# Supplementary material for: Which halogen to choose? Comparing the effects of chlorine and fluorine as bioisosteric substituents in drug design
Source: Royal Society of Chemistry journal article supplement (doi:10.1039/d5sc07348k), 2026-01-01
Supplement: d5sc07348k1.pdf [file d5sc07348k1.pdf]

Matched Pair data final.xlsx

This file cannot be rendered in this PDF. Please download the source file.
