# Supplementary material for: Which halogen to choose? Comparing the effects of chlorine and fluorine as bioisosteric substituents in drug design
Source: Chem Sci. 2026 Jan 8;17(5):2477–505. doi: 10.1039/d5sc07348k (PMC12814216; doi:10.1039/d5sc07348k)
Supplement: SC-017-D5SC07348K-s002 [file SC-017-D5SC07348K-s002.xlsx]

## Sheet: Binding constants
Structure F	Structure Cl	pIC50 F	pIC50 Cl	Diff pIC50	Assay F	Assay Cl	true/false			F	Cl	Difference
CC(=O)NC(Cc1c[nH]c2ccc(F)cc12)C(=O)NC(Cc1ccccc1)C(=O)NCC(N)=O	CC(=O)NC(Cc1c[nH]c2ccc(Cl)cc12)C(=O)NC(Cc1ccccc1)C(=O)NCC(N)=O	4	7.68194	-3.68194	CHEMBL3366385	CHEMBL3366385	TRUE		Mean	6.26012	6.29036	-0.0302305
O=C(c1ccc(-c2cc(Nc3ccccc3Cl)ncn2)cc1)N1CCN(C(=O)c2ccccc2F)CC1	O=C(c1ccc(-c2cc(Nc3ccccc3Cl)ncn2)cc1)N1CCN(C(=O)c2ccccc2Cl)CC1	3.85078	7.1549	-3.30412	CHEMBL3379074	CHEMBL3379074	TRUE		Median	6.1549	6.19928	0
O=S(=O)(NCc1cccc(F)c1)c1cc(Cl)c(Oc2cccc(N3CCNCC3)c2)s1	O=S(=O)(NCc1cccc(Cl)c1)c1cc(Cl)c(Oc2cccc(N3CCNCC3)c2)s1	7.39794	10.699	-3.30103	CHEMBL4616985	CHEMBL4616985	TRUE
COc1cc(-c2cccc(F)c2)c(F)cc1-n1c(=O)ccc2cc(S(=O)(=O)Nc3ccon3)ccc21	COc1cc(-c2cccc(Cl)c2)c(F)cc1-n1c(=O)ccc2cc(S(=O)(=O)Nc3ccon3)ccc21	4.74473	7.95861	-3.21388	CHEMBL4012328	CHEMBL4012328	TRUE
Fc1ccccc1C1=NOC(Cc2ccccc2)C1	Clc1ccccc1C1=NOC(Cc2ccccc2)C1	5.99	9.02998	-3.03998	CHEMBL2327197	CHEMBL2327197	TRUE
Cc1[nH]c2cc(F)ccc2c1Sc1cccc(C(=O)O)n1	Cc1[nH]c2cc(Cl)ccc2c1Sc1cccc(C(=O)O)n1	4.69897	7.60206	-2.90309	CHEMBL4001022	CHEMBL4001022	TRUE
O=C(NN=Cc1cccc(F)c1)c1ccc(-c2cc(=O)c3ccccc3o2)cc1	O=C(NN=Cc1cccc(Cl)c1)c1ccc(-c2cc(=O)c3ccccc3o2)cc1	1.35	4.19044	-2.84044	CHEMBL3736928	CHEMBL3736928	TRUE
CNc1cc(C2(C(=O)Nc3cc(C(=O)Nc4cccc(F)c4)ccc3C)CC2)ncn1	CNc1cc(C2(C(=O)Nc3cc(C(=O)Nc4cccc(Cl)c4)ccc3C)CC2)ncn1	7.22548	9.52288	-2.2974	CHEMBL4050071	CHEMBL4050071	TRUE
CCOC(=O)C1(C)CCCC2(C)C3CCC4(C)CC3(CCC12)CC4=NNC(=S)Nc1ccc(F)cc1	CCOC(=O)C1(C)CCCC2(C)C3CCC4(C)CC3(CCC12)CC4=NNC(=S)Nc1ccc(Cl)cc1	4.55993	6.81593	-2.256	CHEMBL4604302	CHEMBL4604302	TRUE
CC(NC(=O)C1CCC(N2CCOCC2)CC1c1ccc(Br)cc1)c1ccc(F)cc1	CC(NC(=O)C1CCC(N2CCOCC2)CC1c1ccc(Br)cc1)c1ccc(Cl)cc1	6.31876	8.52288	-2.20412	CHEMBL3090540	CHEMBL3090540	TRUE
Cc1cc(C2(C)CC(C)CC=C2C(=O)O)ccc1F	Cc1cc(C2(C)CC(C)CC=C2C(=O)O)ccc1Cl	5	7.16115	-2.16115	CHEMBL3758041	CHEMBL3758041	TRUE
Cc1ccc(-c2ccc(-c3nc4ccc(F)cc4c(C(=O)O)c3C)cc2)c(F)n1	Cc1ccc(-c2ccc(-c3nc4ccc(F)cc4c(C(=O)O)c3C)cc2)c(Cl)n1	5.48017	7.5817	-2.10153	CHEMBL4224224	CHEMBL4224224	TRUE
CC(C)(C)OC(=O)N1CCN(C(=S)SCc2cn(Cc3cc(=O)oc4cc(F)ccc34)nn2)CC1	CC(C)(C)OC(=O)N1CCN(C(=S)SCc2cn(Cc3cc(=O)oc4cc(Cl)ccc34)nn2)CC1	4.07469	6.17393	-2.09924	CHEMBL3134848	CHEMBL3134848	TRUE
C=CC(=O)N(Cc1cc(C)no1)c1nc(-c2ccc(F)cc2O)cs1	C=CC(=O)N(Cc1cc(C)no1)c1nc(-c2ccc(Cl)cc2O)cs1	7.39794	9.49485	-2.09691	CHEMBL4401249	CHEMBL4401249	TRUE
Nc1n[nH]c2cccc(-c3cccc(NC(=O)Nc4cccc(F)c4)c3)c12	Nc1n[nH]c2cccc(-c3cccc(NC(=O)Nc4cccc(Cl)c4)c3)c12	7.22768	9.30103	-2.07335	CHEMBL3636058	CHEMBL3636058	TRUE
CN(CC=Cc1ccc(F)cc1)Cc1ccc2c(c1)OCCC2	CN(CC=Cc1ccc(Cl)cc1)Cc1ccc2c(c1)OCCC2	6	8.04576	-2.04576	CHEMBL4019654	CHEMBL4019654	TRUE
Cn1cc2cc(C(=O)Nc3ccc(F)c(F)c3)ccc2n1	Cn1cc2cc(C(=O)Nc3ccc(F)c(Cl)c3)ccc2n1	6.11691	8.09002	-1.97311	CHEMBL3996822	CHEMBL3996822	TRUE
O=C(COc1ccc(F)cc1)NNC(=S)NCc1ccc(-c2ccccc2)cc1	O=C(COc1ccc(Cl)cc1)NNC(=S)NCc1ccc(-c2ccccc2)cc1	4	5.92082	-1.92082	CHEMBL2438451	CHEMBL2438451	TRUE
O=[N+]([O-])c1cc(F)ccc1CC(O)c1ccc(-n2cccn2)cc1	O=[N+]([O-])c1cc(Cl)ccc1CC(O)c1ccc(-n2cccn2)cc1	5.06048	6.89279	-1.83231	CHEMBL4201221	CHEMBL4201221	TRUE
COc1cc(-c2cccc(F)c2)c(F)cc1-n1c(=O)ccc2cc(S(=O)(=O)Nc3ccon3)ccc21	COc1cc(-c2cccc(F)c2)c(Cl)cc1-n1c(=O)ccc2cc(S(=O)(=O)Nc3ccon3)ccc21	4.74473	6.56864	-1.82391	CHEMBL4012328	CHEMBL4012328	TRUE
Cc1c(Br)cn(Cc2ccccc2F)c(=O)c1NC(=O)C1CCCCCC1	Cc1c(Br)cn(Cc2ccccc2Cl)c(=O)c1NC(=O)C1CCCCCC1	5	6.82391	-1.82391	CHEMBL4820328	CHEMBL4820328	TRUE
Fc1cccc(C2=NOC(Cc3ccccc3)C2)c1	Clc1cccc(C2=NOC(Cc3ccccc3)C2)c1	6	7.81987	-1.81987	CHEMBL2327197	CHEMBL2327197	TRUE
O=C(Nc1ccc(CN2CC[CH](C(=O)O)C2)cn1)c1cccc(-c2ccc3c(c2)OCCO3)c1F	O=C(Nc1ccc(CN2CC[CH](C(=O)O)C2)cn1)c1cccc(-c2ccc3c(c2)OCCO3)c1Cl	6	7.79129	-1.79129	CHEMBL5042465	CHEMBL5042465	TRUE
Cc1ccc(C(=O)Nc2cccc(F)c2)cc1NC(=O)C1(c2ncnc3[nH]ccc23)CC1	Cc1ccc(C(=O)Nc2cccc(Cl)c2)cc1NC(=O)C1(c2ncnc3[nH]ccc23)CC1	7.91009	9.69897	-1.78888	CHEMBL4331432	CHEMBL4331432	TRUE
N#CC1CC(F)(F)CN1C(=O)CNC(=O)c1csc(Cc2ccc(F)cc2Cl)n1	N#CC1CC(F)(F)CN1C(=O)CNC(=O)c1csc(Cc2ccc(Cl)cc2Cl)n1	7.22185	9	-1.77815	CHEMBL4714146	CHEMBL4714146	TRUE
C=CC1CC1(NC(=O)C1CC(Oc2nccc3c(F)cccc23)CN1C(=O)C(NC(=O)OC(C)(C)C)C(C)(C)C)C(=O)NS(=O)(=O)C1CC1	C=CC1CC1(NC(=O)C1CC(Oc2nccc3c(Cl)cccc23)CN1C(=O)C(NC(=O)OC(C)(C)C)C(C)(C)C)C(=O)NS(=O)(=O)C1CC1	7.25964	9	-1.74036	CHEMBL3128635	CHEMBL3128635	TRUE
O=C(O)c1csc(C2CCC3C(CC(O)C3COc3ccccc3F)O2)n1	O=C(O)c1csc(C2CCC3C(CC(O)C3COc3ccccc3Cl)O2)n1	5	6.6925	-1.6925	CHEMBL3808246	CHEMBL3808246	TRUE
Fc1ccc2c3c1CCN3CCNC2	Clc1ccc2c3c1CCN3CCNC2	5.60206	7.284	-1.68194	CHEMBL4617350	CHEMBL4617350	TRUE
O=C(CC(O)c1cccc(F)c1)NO	O=C(CC(O)c1cccc(Cl)c1)NO	5.39903	7.08092	-1.68189	CHEMBL2428642	CHEMBL2428642	TRUE
CN(C)CCCC1(c2ccc(F)cc2)OCc2cc(C(=O)NNC(=O)c3cccc(F)c3)ccc21	CN(C)CCCC1(c2ccc(F)cc2)OCc2cc(C(=O)NNC(=O)c3cccc(Cl)c3)ccc21	3.73386	5.40894	-1.67507	CHEMBL4192266	CHEMBL4192266	TRUE
O=S(=O)(C=Cc1ncccc1Cl)c1cccc(F)c1	O=S(=O)(C=Cc1ncccc1Cl)c1cccc(Cl)c1	5.66615	7.33724	-1.67109	CHEMBL4712767	CHEMBL4712767	TRUE
O=C(O)c1cc(-c2ccc(-c3cccnc3F)cc2)nc2ccccc12	O=C(O)c1cc(-c2ccc(-c3cccnc3Cl)cc2)nc2ccccc12	5.84771	7.48545	-1.63774	CHEMBL4224224	CHEMBL4224224	TRUE
Fc1ccc(C2C=C(c3cccc4ccccc34)Nc3nncn32)cc1	Clc1ccc(C2C=C(c3cccc4ccccc34)Nc3nncn32)cc1	4.4086	6.04576	-1.63716	CHEMBL4390107	CHEMBL4390107	TRUE
O=C1CSC(c2ccc3cccc(O)c3n2)N1c1ccc(F)cc1	O=C1CSC(c2ccc3cccc(O)c3n2)N1c1ccc(Cl)cc1	4.34208	5.95861	-1.61652	CHEMBL4722526	CHEMBL4722526	TRUE
N#Cc1ccnc(N2C(=O)CCC2C(=O)N(c2cccc(F)c2)C2(C(=O)NC3CC(F)(F)C3)CCc3ccccc32)c1	N#Cc1ccnc(N2C(=O)CCC2C(=O)N(c2cccc(Cl)c2)C2(C(=O)NC3CC(F)(F)C3)CCc3ccccc32)c1	5	6.59346	-1.59346	CHEMBL4180676	CHEMBL4180676	TRUE
Cc1cc(C)n2nc(C(=O)NS(=O)(=O)c3ccccc3F)nc2n1	Cc1cc(C)n2nc(C(=O)NS(=O)(=O)c3ccccc3Cl)nc2n1	5.24	6.81999	-1.57999	CHEMBL3271706	CHEMBL3271706	TRUE
CN1CCN(C(=O)c2ccc(NC(=O)c3csc4c(=O)[nH]cnc34)c(F)c2)CC1	CN1CCN(C(=O)c2ccc(NC(=O)c3csc4c(=O)[nH]cnc34)c(Cl)c2)CC1	6.65758	8.23657	-1.57899	CHEMBL3826003	CHEMBL3826003	TRUE
CCC(Nc1ncnc2[nH]cnc12)C1=Nc2cccc(F)c2S(=O)(=O)N1c1ccccc1	CCC(Nc1ncnc2[nH]cnc12)C1=Nc2cccc(Cl)c2S(=O)(=O)N1c1ccccc1	5.52288	7.09151	-1.56864	CHEMBL4385718	CHEMBL4385718	TRUE
COc1cnc2ccc(=O)n(CCN3CCN(C(=O)Nc4ccc(F)cc4)CC3)c2c1	COc1cnc2ccc(=O)n(CCN3CCN(C(=O)Nc4ccc(Cl)cc4)CC3)c2c1	4.93517	6.49485	-1.55968	CHEMBL3745429	CHEMBL3745429	TRUE
Cc1cc(NCc2c(F)ccc(Cl)c2F)c2cccc(C(N)=O)c2n1	Cc1cc(NCc2c(F)ccc(Cl)c2Cl)c2cccc(C(N)=O)c2n1	5.3279	6.88606	-1.55815	CHEMBL3607749	CHEMBL3607749	TRUE
O=C(Nc1scc(-c2ccc(Cl)cc2)c1C(=O)O)c1cc(F)ccc1Br	O=C(Nc1scc(-c2ccc(Cl)cc2)c1C(=O)O)c1cc(Cl)ccc1Br	6.01773	7.5376	-1.51987	CHEMBL5123727	CHEMBL5123727	TRUE
CC(=NNC(=O)C1=C(O)c2ccccc2S(=O)(=O)N1C)c1ccc(F)cc1	CC(=NNC(=O)C1=C(O)c2ccccc2S(=O)(=O)N1C)c1ccc(Cl)cc1	4.60033	6.11919	-1.51886	CHEMBL4141646	CHEMBL4141646	TRUE
O=C(Nc1scc(-c2ccc(Cl)cc2)c1C(=O)O)c1cc(Cl)ccc1F	O=C(Nc1scc(-c2ccc(Cl)cc2)c1C(=O)O)c1cc(Cl)ccc1Cl	5.057	6.56864	-1.51164	CHEMBL5123727	CHEMBL5123727	TRUE
O=C1CCSCC(C(=O)Nc2cc(F)cc(F)c2)N1	O=C1CCSCC(C(=O)Nc2cc(F)cc(Cl)c2)N1	5.05061	6.55596	-1.50535	CHEMBL4737546	CHEMBL4737546	TRUE
Cc1cc(=O)[nH]c(=O)n1C(=NO)c1ccc(F)cc1	Cc1cc(=O)[nH]c(=O)n1C(=NO)c1ccc(Cl)cc1	4.35556	5.85387	-1.49831	CHEMBL4253665	CHEMBL4253665	TRUE
COc1ccc(/C=C/C(=O)N2CCN(c3ccc(F)c(F)c3)CC2)cc1[N+](=O)[O-	COc1ccc(/C=C/C(=O)N2CCN(c3ccc(F)c(Cl)c3)CC2)cc1[N+](=O)[O-	4.81051	6.29243	-1.48192	CHEMBL5134881	CHEMBL5134881	TRUE
O=C(O)Cc1ccccc1Nc1c(F)cccc1F	O=C(O)Cc1ccccc1Nc1c(F)cccc1Cl	5.92082	7.39794	-1.47712	CHEMBL2438466	CHEMBL2438466	TRUE
Cc1ccc(Nc2ccccc2F)c(CC(=O)O)c1	Cc1ccc(Nc2ccccc2Cl)c(CC(=O)O)c1	5.74473	7.22185	-1.47712	CHEMBL2438466	CHEMBL2438466	TRUE
O=C(Nc1ccc(Cl)c(-c2nnc3c(Cl)cccn23)c1)c1ccc(F)cc1Cl	O=C(Nc1ccc(Cl)c(-c2nnc3c(Cl)cccn23)c1)c1ccc(Cl)cc1Cl	5.08523	6.54516	-1.45992	CHEMBL4625857	CHEMBL4625857	TRUE
Fc1ccc2nc(NCCc3c[nH]c4ccccc34)nc(Nc3ccc4[nH]ncc4c3)c2c1	Clc1ccc2nc(NCCc3c[nH]c4ccccc34)nc(Nc3ccc4[nH]ncc4c3)c2c1	6.03621	7.48149	-1.44527	CHEMBL4012135	CHEMBL4012135	TRUE
CC(Nc1nc(N)nc(N)c1C#N)c1nc2c(F)ccc(F)c2c(=O)n1-c1cccnc1	CC(Nc1nc(N)nc(N)c1C#N)c1nc2c(F)ccc(Cl)c2c(=O)n1-c1cccnc1	7.95861	9.39794	-1.43933	CHEMBL4765887	CHEMBL4765887	TRUE
CC1(C)CC(NC(=O)C(=O)Nc2ccnc(F)c2)CC(C)(C)N1	CC1(C)CC(NC(=O)C(=O)Nc2ccnc(Cl)c2)CC(C)(C)N1	4.20066	5.63827	-1.43761	CHEMBL4424064	CHEMBL4424064	TRUE
COc1ccc(-c2csc(N3N=C(c4ccc(F)cc4)CC3c3cccs3)n2)cc1	COc1ccc(-c2csc(N3N=C(c4ccc(Cl)cc4)CC3c3cccs3)n2)cc1	5.29073	6.72125	-1.43052	CHEMBL3371858	CHEMBL3371858	TRUE
COc1ccc(-c2csc(N3N=C(c4ccc(F)cc4)CC3c3cccs3)n2)cc1	COc1ccc(-c2csc(N3N=C(c4ccc(Cl)cc4)CC3c3cccs3)n2)cc1	5.29073	6.72125	-1.43052	CHEMBL3371858	CHEMBL3371858	TRUE
Nc1nc(NCc2ccc(F)cc2)nc2ccccc12	Nc1nc(NCc2ccc(Cl)cc2)nc2ccccc12	4.60206	6.03152	-1.42946	CHEMBL3817084	CHEMBL3817084	TRUE
COCCCCC(=NOCCN)c1ccc(F)cc1	COCCCCC(=NOCCN)c1ccc(Cl)cc1	5.79129	7.21467	-1.42338	CHEMBL4842937	CHEMBL4842937	TRUE
C=CC(=O)Nc1cccc(Nc2nc(Nc3ccc(CP(=O)(OCC)OCC)cc3)ncc2F)c1	C=CC(=O)Nc1cccc(Nc2nc(Nc3ccc(CP(=O)(OCC)OCC)cc3)ncc2Cl)c1	7.49349	8.91009	-1.4166	CHEMBL3874808	CHEMBL3874808	TRUE
Cc1ccoc1C(=O)Nc1cnc(N2C(=O)c3cccc(F)c3C2=O)nc1	Cc1ccoc1C(=O)Nc1cnc(N2C(=O)c3cccc(Cl)c3C2=O)nc1	5.27	6.68194	-1.41194	CHEMBL3635102	CHEMBL3635102	TRUE
Cc1cc(NCc2cccc(Cl)c2F)c2cccc(C(N)=O)c2n1	Cc1cc(NCc2cccc(Cl)c2Cl)c2cccc(C(N)=O)c2n1	4.79588	6.20761	-1.41173	CHEMBL3607749	CHEMBL3607749	TRUE
O=C(Cc1ccc(F)cc1)Nc1cccc(O)c1	O=C(Cc1ccc(Cl)cc1)Nc1cccc(O)c1	4	5.39946	-1.39946	CHEMBL5138374	CHEMBL5138374	TRUE
Cc1ccc(Nc2c(F)cccc2F)c(CC(=O)O)c1	Cc1ccc(Nc2c(F)cccc2Cl)c(CC(=O)O)c1	6	7.39794	-1.39794	CHEMBL2438466	CHEMBL2438466	TRUE
O=C(Nc1scc(-c2ccc(Cl)cc2)c1C(=O)O)c1cc(F)ccc1Cl	O=C(Nc1scc(-c2ccc(Cl)cc2)c1C(=O)O)c1cc(Cl)ccc1Cl	5.18376	6.56864	-1.38488	CHEMBL5123727	CHEMBL5123727	TRUE
CCCCN1CCC(N(Cc2ccccc2)C(=O)Nc2ccc(F)c(Cl)c2)CC1	CCCCN1CCC(N(Cc2ccccc2)C(=O)Nc2ccc(Cl)c(Cl)c2)CC1	5.96257	7.34679	-1.38421	CHEMBL4024549	CHEMBL4024549	TRUE
CNc1cc(C2(C(=O)Nc3cc(C(=O)Nc4ccc(F)cc4)ccc3C)CC2)ncn1	CNc1cc(C2(C(=O)Nc3cc(C(=O)Nc4ccc(Cl)cc4)ccc3C)CC2)ncn1	6.6968	8.07572	-1.37892	CHEMBL4050071	CHEMBL4050071	TRUE
C#CCN(C)Cc1ccc(F)cc1	C#CCN(C)Cc1ccc(Cl)cc1	3.50724	4.88606	-1.37882	CHEMBL4387563	CHEMBL4387563	TRUE
CC#CCn1c(N2CCCC(N)C2)nc2c1c(=O)n(Cc1ccc(F)cc1C(=O)O)c(=O)n2C	CC#CCn1c(N2CCCC(N)C2)nc2c1c(=O)n(Cc1ccc(Cl)cc1C(=O)O)c(=O)n2C	8.62893	10	-1.37107	CHEMBL4368093	CHEMBL4368093	TRUE
CC(C)N1CCC(NC(=O)c2cc3ccccc3n2Cc2cc(-c3ccc(F)s3)on2)CC1	CC(C)N1CCC(NC(=O)c2cc3ccccc3n2Cc2cc(-c3ccc(Cl)s3)on2)CC1	7.1549	8.52288	-1.36798	CHEMBL5107327	CHEMBL5107327	TRUE
NS(=O)(=O)c1ccc2nc(-n3cc(C(=O)O)c(-c4ccc(F)cc4)n3)sc2c1	NS(=O)(=O)c1ccc2nc(-n3cc(C(=O)O)c(-c4ccc(Cl)cc4)n3)sc2c1	7.20482	8.55284	-1.34803	CHEMBL3382963	CHEMBL3382963	TRUE
Fc1ccc(Nc2ccc(Oc3ccccc3)cc2)cc1	Clc1ccc(Nc2ccc(Oc3ccccc3)cc2)cc1	5	6.33348	-1.33348	CHEMBL4189194	CHEMBL4189194	TRUE
Cc1cccc(C2NC(=O)c3c(F)cccc3N2)c1	Cc1cccc(C2NC(=O)c3c(Cl)cccc3N2)c1	5.25181	6.58503	-1.33321	CHEMBL5112650	CHEMBL5112650	TRUE
COc1ccc(C23c4ccccc4C(=O)N2CCN3C(=O)c2cc(F)c(F)c(F)c2)cc1F	COc1ccc(C23c4ccccc4C(=O)N2CCN3C(=O)c2cc(F)c(F)c(F)c2)cc1Cl	4.52288	5.85387	-1.33099	CHEMBL3380864	CHEMBL3380864	TRUE
CC(C)N1CCC(NC(=O)c2cc3ccccc3n2CC(=O)Nc2ccc(F)cc2)CC1	CC(C)N1CCC(NC(=O)c2cc3ccccc3n2CC(=O)Nc2ccc(Cl)cc2)CC1	7.20066	8.52288	-1.32222	CHEMBL5107327	CHEMBL5107327	TRUE
COc1cccc(C(=O)NCc2c(C)cc(C)[nH]c2=O)c1F	COc1cccc(C(=O)NCc2c(C)cc(C)[nH]c2=O)c1Cl	3.82391	5.14267	-1.31876	CHEMBL3858046	CHEMBL3858046	TRUE
CC(NC(=O)c1cc(N)ccc1F)c1cccc2ccccc12	CC(NC(=O)c1cc(N)ccc1Cl)c1cccc2ccccc12	4	5.31876	-1.31876	CHEMBL5043143	CHEMBL5043143	TRUE
O=C(COc1ccccc1F)Nc1cccnc1	O=C(COc1ccccc1Cl)Nc1cccnc1	3.5376	4.85387	-1.31627	CHEMBL4334738	CHEMBL4334738	TRUE
N#CCCN1CCC2CCN(c3ncnc4[nH]c5cc(F)ccc5c34)C2C1	N#CCCN1CCC2CCN(c3ncnc4[nH]c5cc(Cl)ccc5c34)C2C1	5.57381	6.88606	-1.31224	CHEMBL5046564	CHEMBL5046564	TRUE
Fc1ccc(C2=NN(c3nc(-c4ccc(C(F)(F)F)cc4)cs3)C(c3cccs3)C2)cc1	FC(F)(F)c1ccc(-c2csc(N3N=C(c4ccc(Cl)cc4)CC3c3cccs3)n2)cc1	5.99568	7.30103	-1.30535	CHEMBL3371858	CHEMBL3371858	TRUE
Fc1ccc(C2=NN(c3nc(-c4ccc(C(F)(F)F)cc4)cs3)C(c3cccs3)C2)cc1	FC(F)(F)c1ccc(-c2csc(N3N=C(c4ccc(Cl)cc4)CC3c3cccs3)n2)cc1	5.99568	7.30103	-1.30535	CHEMBL3371858	CHEMBL3371858	TRUE
O=C(CN1C(=O)C2(OCCO2)c2ccccc21)c1cccc(F)c1	O=C(CN1C(=O)C2(OCCO2)c2ccccc21)c1cccc(Cl)c1	6.52288	7.82391	-1.30103	CHEMBL3865749	CHEMBL3865749	TRUE
O=[N+]([O-])c1c(Nc2cc(F)cc(F)c2)ccc2nonc12	O=[N+]([O-])c1c(Nc2cc(F)cc(Cl)c2)ccc2nonc12	5.69897	7	-1.30103	CHEMBL2319602	CHEMBL2319602	TRUE
CC(C)N(Cc1nc(-c2ccccc2)no1)C(=O)COc1ccc(F)cc1	CC(C)N(Cc1nc(-c2ccccc2)no1)C(=O)COc1ccc(Cl)cc1	4.99611	6.29243	-1.29632	CHEMBL2352047	CHEMBL2352047	TRUE
COc1ccc2c(OCCC3NC(=O)N(C)CCCCC=CC4CC4(C(=O)NS(=O)(=O)C4CC4)NC3=O)cc(-c3nc(C(C)C)cs3)nc2c1F	COc1ccc2c(OCCC3NC(=O)N(C)CCCCC=CC4CC4(C(=O)NS(=O)(=O)C4CC4)NC3=O)cc(-c3nc(C(C)C)cs3)nc2c1Cl	5.82681	7.11634	-1.28952	CHEMBL3611341	CHEMBL3611341	TRUE
O=c1[nH]c(=S)[nH]c2c(-c3ccc(F)cc3)cnn12	O=c1[nH]c(=S)[nH]c2c(-c3ccc(Cl)cc3)cnn12	4.97881	6.26761	-1.2888	CHEMBL2406882	CHEMBL2406882	TRUE
COc1ccc2c(OCCC3NC(=O)N(C)CCCCC=CC4CC4(C(=O)NS(=O)(=O)C4(C)CC4)NC3=O)cc(-c3nc(C(C)C)cs3)nc2c1F	COc1ccc2c(OCCC3NC(=O)N(C)CCCCC=CC4CC4(C(=O)NS(=O)(=O)C4(C)CC4)NC3=O)cc(-c3nc(C(C)C)cs3)nc2c1Cl	6.25571	7.54212	-1.28641	CHEMBL3611341	CHEMBL3611341	TRUE
Cc1cc(C2CN(C(=O)c3ccc(F)c(F)c3)CC(F)(F)C2)n2ncnc2n1	Cc1cc(C2CN(C(=O)c3ccc(F)c(Cl)c3)CC(F)(F)C2)n2ncnc2n1	6.00568	7.284	-1.27831	CHEMBL4008514	CHEMBL4008514	TRUE
COc1cc2c(Nc3ccc(F)c(C(F)(F)F)c3)ncnc2cc1OCC1CNCCO1	COc1cc2c(Nc3ccc(Cl)c(C(F)(F)F)c3)ncnc2cc1OCC1CNCCO1	5.49349	6.76955	-1.27606	CHEMBL3376294	CHEMBL3376294	TRUE
Fc1ccc2nc(Nc3ccc4[nH]ncc4c3)nc(NCCc3c[nH]c4ccccc34)c2c1	Clc1ccc2nc(Nc3ccc4[nH]ncc4c3)nc(NCCc3c[nH]c4ccccc34)c2c1	5.76045	7.03152	-1.27107	CHEMBL4012135	CHEMBL4012135	TRUE
O=c1c(=Cc2ccc(F)cc2)sc2n1CN(c1ccccc1)CN=2	O=c1c(=Cc2ccc(Cl)cc2)sc2n1CN(c1ccccc1)CN=2	5.658	6.92082	-1.26282	CHEMBL4314448	CHEMBL4314448	TRUE
O=C(CCCc1c[nH]nn1)NC1CCN(C(=O)OCc2cc(F)cc(Cl)c2)CC1	O=C(CCCc1c[nH]nn1)NC1CCN(C(=O)OCc2cc(Cl)cc(Cl)c2)CC1	7.25964	8.50864	-1.249	CHEMBL4123927	CHEMBL4123927	TRUE
O=C(c1cccs1)N1CCN(CCOc2ccc(F)cc2)CC1	O=C(c1cccs1)N1CCN(CCOc2ccc(Cl)cc2)CC1	4.89585	6.14267	-1.24681	CHEMBL3271550	CHEMBL3271550	TRUE
O=S(=O)(C=Cc1cccnc1Cl)c1ccccc1F	O=S(=O)(C=Cc1cccnc1Cl)c1ccccc1Cl	5.47031	6.7167	-1.24639	CHEMBL4712767	CHEMBL4712767	TRUE
Cc1cc(CC(NC(=O)N2CCC(c3ccccc3F)CC2)C(=O)N2CCC(N3CCCCC3)CC2)cc2cn[nH]c12	Cc1cc(CC(NC(=O)N2CCC(c3ccccc3Cl)CC2)C(=O)N2CCC(N3CCCCC3)CC2)cc2cn[nH]c12	6.76955	8.00877	-1.23922	CHEMBL3773899	CHEMBL3773899	TRUE
CC(C(=O)NCc1ccc(C(F)(F)F)cc1F)c1ccc(NS(C)(=O)=O)c(F)c1	CC(C(=O)NCc1ccc(C(F)(F)F)cc1Cl)c1ccc(NS(C)(=O)=O)c(F)c1	7.16304	8.39794	-1.2349	CHEMBL3630759	CHEMBL3630759	TRUE
CC(C(=O)NCc1ccc(C(F)(F)F)cc1F)c1ccc(NS(C)(=O)=O)c(F)c1	CC(C(=O)NCc1ccc(C(F)(F)F)cc1Cl)c1ccc(NS(C)(=O)=O)c(F)c1	7.16304	8.39794	-1.2349	CHEMBL3630759	CHEMBL3630759	TRUE
CN1C(=O)CCC1C(=O)NCc1cccc(C(F)(F)F)c1F	CN1C(=O)CCC1C(=O)NCc1cccc(C(F)(F)F)c1Cl	6.81645	8.05061	-1.23416	CHEMBL4340267	CHEMBL4340267	TRUE
N=C(N)NN=Cc1ccccc1F	N=C(N)NN=Cc1ccccc1Cl	3.69897	4.92445	-1.22548	CHEMBL3854595	CHEMBL3854595	TRUE
CN1c2ccc(-c3cnc(N)c(F)c3N3CCC4(CCNC4=O)CC3)cc2CS1(=O)=O	CN1c2ccc(-c3cnc(N)c(Cl)c3N3CCC4(CCNC4=O)CC3)cc2CS1(=O)=O	7.73518	8.95861	-1.22343	CHEMBL3803421	CHEMBL3803421	TRUE
Nc1ccc(Sc2ccc(F)cc2[N+](=O)[O-])cc1	Nc1ccc(Sc2ccc(Cl)cc2[N+](=O)[O-])cc1	5.20901	6.4318	-1.22279	CHEMBL3383864	CHEMBL3383864	TRUE
COC(=O)C(c1ccc(F)cc1Cl)n1ccc2c(NS(C)(=O)=O)cccc21	COC(=O)C(c1ccc(Cl)cc1Cl)n1ccc2c(NS(C)(=O)=O)cccc21	6.27572	7.48149	-1.20576	CHEMBL4717253	CHEMBL4717253	TRUE
OCC1CC(O)CCN1CCc1ccc(Nc2nc(-c3cccc(F)c3)cs2)cc1	OCC1CC(O)CCN1CCc1ccc(Nc2nc(-c3cccc(Cl)c3)cs2)cc1	6.49485	7.69897	-1.20412	CHEMBL2412224	CHEMBL2412224	TRUE
CC(C)(C)c1ccc(C(=O)NCc2ccc(C(=O)O)c(F)c2)cc1	CC(C)(C)c1ccc(C(=O)NCc2ccc(C(=O)O)c(Cl)c2)cc1	6.85387	8.05552	-1.20165	CHEMBL4019413	CHEMBL4019413	TRUE
N#Cc1cc(F)cc(-c2cc(-n3cccn3)ncn2)c1	N#Cc1cc(Cl)cc(-c2cc(-n3cccn3)ncn2)c1	7.19997	8.40001	-1.20004	CHEMBL3606566	CHEMBL3606566	TRUE
COC1Oc2ccc(F)cc2C(=O)C1=CNc1ccc(S(N)(=O)=O)cc1	COC1Oc2ccc(Cl)cc2C(=O)C1=CNc1ccc(S(N)(=O)=O)cc1	4.16368	5.3536	-1.18992	CHEMBL3804258	CHEMBL3804258	TRUE
CN(CC=Cc1ccc(F)cc1)Cc1coc2ccccc12	CN(CC=Cc1ccc(Cl)cc1)Cc1coc2ccccc12	7.13018	8.3098	-1.17962	CHEMBL4027654	CHEMBL4027654	TRUE
O=C(COc1ccc(F)cc1)NO	O=C(COc1ccc(Cl)cc1)NO	4.72354	5.89963	-1.17609	CHEMBL4233573	CHEMBL4233573	TRUE
N#Cc1c(N)nc(N)nc1N1C[CH](OC(=O)NCc2ccc(C(=O)NO)cc2)C[CH]1c1nc2cccc(F)c2c(=O)n1-c1ccccc1	N#Cc1c(N)nc(N)nc1N1C[CH](OC(=O)NCc2ccc(C(=O)NO)cc2)C[CH]1c1nc2cccc(Cl)c2c(=O)n1-c1ccccc1	7.61979	8.79588	-1.17609	CHEMBL5217050	CHEMBL5217050	TRUE
CCn1ncc2cc3nc(c21)CC(O)COCC(c1cccc(F)c1)NC(=O)N3	CCn1ncc2cc3nc(c21)CC(O)COCC(c1cccc(Cl)c1)NC(=O)N3	7.83893	9.00183	-1.1629	CHEMBL3867361	CHEMBL3867361	TRUE
CCN(C(=O)c1ccccc1OCc1ccccc1F)C1CCCC(N)C1	CCN(C(=O)c1ccccc1OCc1ccccc1Cl)C1CCCC(N)C1	6.36151	7.52433	-1.16282	CHEMBL2445667	CHEMBL2445667	TRUE
Nc1[nH]c(C(=O)c2ccccc2)c(-c2ccc(Cl)cc2Cl)c1C(=O)c1cccc(F)c1	Nc1[nH]c(C(=O)c2ccccc2)c(-c2ccc(Cl)cc2Cl)c1C(=O)c1cccc(Cl)c1	4	5.16115	-1.16115	CHEMBL4133015	CHEMBL4133015	TRUE
Cc1ccc(C(=O)Nc2ccc(F)cc2)cc1NC(=O)C1(c2ncnc3[nH]ccc23)CC1	Cc1ccc(C(=O)Nc2ccc(Cl)cc2)cc1NC(=O)C1(c2ncnc3[nH]ccc23)CC1	7.76955	8.92082	-1.15127	CHEMBL4331432	CHEMBL4331432	TRUE
O=C(NC(CC1CCCCC1)C(=O)NC(CC1CCNC1=O)C(=O)C(=O)NC1CC1)OCc1cccc(F)c1	O=C(NC(CC1CCCCC1)C(=O)NC(CC1CCNC1=O)C(=O)C(=O)NC1CC1)OCc1cccc(Cl)c1	5.45593	6.60206	-1.14613	CHEMBL3429731	CHEMBL3429731	TRUE
O=C(NNS(=O)(=O)c1ccccc1)c1cccc(-c2cccc(F)c2)c1	O=C(NNS(=O)(=O)c1ccccc1)c1cccc(-c2cccc(Cl)c2)c1	4.95861	6.10237	-1.14377	CHEMBL4374936	CHEMBL4374936	TRUE
COCc1nn(Cc2ccc(Cn3ccccc3=O)cc2)cc1C(=O)NCc1ncc(F)cc1F	COCc1nn(Cc2ccc(Cn3ccccc3=O)cc2)cc1C(=O)NCc1ncc(Cl)cc1F	5.65365	6.79588	-1.14223	CHEMBL5112809	CHEMBL5112809	TRUE
CC(C)N(Cc1nc(-c2cccnc2)no1)C(=O)COc1ccc(F)cc1	CC(C)N(Cc1nc(-c2cccnc2)no1)C(=O)COc1ccc(Cl)cc1	5.71444	6.85387	-1.13943	CHEMBL2352047	CHEMBL2352047	TRUE
O=C(c1ccco1)N1CCN(Cc2cc(=O)c(OCc3cccc(F)c3)co2)CC1	O=C(c1ccco1)N1CCN(Cc2cc(=O)c(OCc3cccc(Cl)c3)co2)CC1	5.4318	6.56864	-1.13684	CHEMBL4396232	CHEMBL4396232	TRUE
Cc1ccc(-c2ccc(-c3nc4ccccc4c(C(=O)O)c3C)cc2)c(F)n1	Cc1ccc(-c2ccc(-c3nc4ccccc4c(C(=O)O)c3C)cc2)c(Cl)n1	5.60555	6.73518	-1.12963	CHEMBL4224224	CHEMBL4224224	TRUE
O=C(c1c(O)cc(Cl)cc1F)N1CCC2(CCC2)C1	O=C(c1c(O)cc(Cl)cc1Cl)N1CCC2(CCC2)C1	5.11238	6.23657	-1.12419	CHEMBL4360952	CHEMBL4360952	TRUE
O=c1oc2ccc(F)cc2n1Cc1ccc(Cl)cc1	O=c1oc2ccc(Cl)cc2n1Cc1ccc(Cl)cc1	4.0927	5.2161	-1.1234	CHEMBL4191920	CHEMBL4191920	TRUE
O=C(O)c1ccc(CN2C(=O)c3ccc(Cl)cc3NC(=O)C2Cc2ccccc2F)cc1	O=C(O)c1ccc(CN2C(=O)c3ccc(Cl)cc3NC(=O)C2Cc2ccccc2Cl)cc1	4.52288	5.63827	-1.11539	CHEMBL4187427	CHEMBL4187427	TRUE
C=C(C)C1CCC(C)=CC1c1c(O)cc(CCCCC)cc1OC(=O)N(C)Cc1ccc(F)cc1	C=C(C)C1CCC(C)=CC1c1c(O)cc(CCCCC)cc1OC(=O)N(C)Cc1ccc(Cl)cc1	7.16115	8.27572	-1.11457	CHEMBL4832641	CHEMBL4832641	TRUE
COc1ccc(/C=C/C(=O)N2CCN(c3ccc(F)c(F)c3)CC2)cc1N	COc1ccc(/C=C/C(=O)N2CCN(c3ccc(F)c(Cl)c3)CC2)cc1N	5.16494	6.27572	-1.11078	CHEMBL5134881	CHEMBL5134881	TRUE
CN(Cc1cn(-c2ccccc2)nc1-c1ccc(F)cc1)C(=O)CCC(=O)O	CN(Cc1cn(-c2ccccc2)nc1-c1ccc(Cl)cc1)C(=O)CCC(=O)O	5.59	6.69999	-1.10999	CHEMBL3830508	CHEMBL3830508	TRUE
Cc1ncnc2c1ccn2C1CC2C(Cc3ccc4cc(F)c(N)nc4c3)CCC2(O)C1O	Cc1ncnc2c1ccn2C1CC2C(Cc3ccc4cc(Cl)c(N)nc4c3)CCC2(O)C1O	7.95861	9.06048	-1.10187	CHEMBL4808435	CHEMBL4808435	TRUE
CCC(=O)Nc1ccc(F)c(S(=O)(=O)N2CCCCC2)c1	CCC(=O)Nc1ccc(Cl)c(S(=O)(=O)N2CCCCC2)c1	3	4.1	-1.1	CHEMBL4313211	CHEMBL4313211	TRUE
NC(=O)CC1COc2cc(F)ccc2N1C(=O)c1ccc2c(c1)NC(=O)CO2	NC(=O)CC1COc2cc(Cl)ccc2N1C(=O)c1ccc2c(c1)NC(=O)CO2	6.2	7.29999	-1.09999	CHEMBL4423293	CHEMBL4423293	TRUE
NCCNc1cc(N2CCCc3ccccc3C2)nc2ccc(F)cc12	NCCNc1cc(N2CCCc3ccccc3C2)nc2ccc(Cl)cc12	5.82391	6.92082	-1.09691	CHEMBL4158583	CHEMBL4158583	TRUE
CNS(=O)(=O)c1ccc(F)c(Nc2ncnc3[nH]ccc23)c1	CNS(=O)(=O)c1ccc(Cl)c(Nc2ncnc3[nH]ccc23)c1	6.60206	7.69897	-1.09691	CHEMBL3861903	CHEMBL3861903	TRUE
Fc1cc(-c2ccccc2)c2cn[nH]c2c1	Clc1cc(-c2ccccc2)c2cn[nH]c2c1	6.01773	7.10237	-1.08464	CHEMBL3802682	CHEMBL3802682	TRUE
CC(=O)NCC(=O)N1CCC2(CC1)CCN(Cc1cccc(F)c1)c1ccccc1O2	CC(=O)NCC(=O)N1CCC2(CC1)CCN(Cc1cccc(Cl)c1)c1ccccc1O2	5	6.08092	-1.08092	CHEMBL2321360	CHEMBL2321360	TRUE
Nc1nccc(-c2c[nH]c3ccc(F)cc23)n1	Nc1nccc(-c2c[nH]c3ccc(Cl)cc23)n1	5.74473	6.82391	-1.07918	CHEMBL2346384	CHEMBL2346384	TRUE
O=CC(CC1CCNC1=O)NC(=O)C(CC1CCCCC1)NC(=O)OCc1cccc(F)c1	O=CC(CC1CCNC1=O)NC(=O)C(CC1CCCCC1)NC(=O)OCc1cccc(Cl)c1	5.92082	7	-1.07918	CHEMBL3429731	CHEMBL3429731	TRUE
O=C(c1ccc(F)cc1)N1CCN(c2cc(=O)[nH]c(=O)n2Cc2ccc(OS(=O)(=O)c3cccc4cnccc34)cc2)CC1	O=C(c1ccc(Cl)cc1)N1CCN(c2cc(=O)[nH]c(=O)n2Cc2ccc(OS(=O)(=O)c3cccc4cnccc34)cc2)CC1	6.14874	7.22185	-1.07311	CHEMBL3745026	CHEMBL3745026	TRUE
CN1C(=O)C2(C(C#N)=C(N)Nc3n[nH]cc32)c2cc(F)ccc21	CN1C(=O)C2(C(C#N)=C(N)Nc3n[nH]cc32)c2cc(Cl)ccc21	5.09745	6.16749	-1.07004	CHEMBL4731869	CHEMBL4731869	TRUE
CCC(Nc1ncnc(N)c1C#N)C1=Nc2cccc(F)c2S(=O)(=O)N1c1ccccc1	CCC(Nc1ncnc(N)c1C#N)C1=Nc2cccc(Cl)c2S(=O)(=O)N1c1ccccc1	6.85078	7.92082	-1.07004	CHEMBL4385718	CHEMBL4385718	TRUE
O=[N+]([O-])c1c(Nc2cccc(F)c2)ccc2nonc12	O=[N+]([O-])c1c(Nc2cccc(Cl)c2)ccc2nonc12	5.67778	6.74473	-1.06695	CHEMBL2319602	CHEMBL2319602	TRUE
O=S(=O)(c1cncc2ccccc12)N1CCC(CCN2CCN(c3cccc(F)c3)CC2)CC1	O=S(=O)(c1cncc2ccccc12)N1CCC(CCN2CCN(c3cccc(Cl)c3)CC2)CC1	6.4318	7.49485	-1.06305	CHEMBL4036229	CHEMBL4036229	TRUE
Cc1ccc(NC(=O)c2ccc(CN3CCOCC3)c(F)c2)cc1Oc1ccc(-c2n[nH]c3ncnc(N)c23)cc1	Cc1ccc(NC(=O)c2ccc(CN3CCOCC3)c(Cl)c2)cc1Oc1ccc(-c2n[nH]c3ncnc(N)c23)cc1	4.6135	5.66314	-1.04964	CHEMBL4706036	CHEMBL4706036	TRUE
O=S(=O)(Nc1ncns1)c1cc(F)c(NCC23CCCN2CCC3)cc1F	O=S(=O)(Nc1ncns1)c1cc(Cl)c(NCC23CCCN2CCC3)cc1F	6.95078	8	-1.04922	CHEMBL4017814	CHEMBL4017814	TRUE
O=C(O)c1ccc(CN2C(=O)c3ccc(F)cc3NC(=O)C2Cc2cccnc2)cc1	O=C(O)c1ccc(CN2C(=O)c3ccc(Cl)cc3NC(=O)C2Cc2cccnc2)cc1	5.0655	6.11351	-1.04801	CHEMBL4187427	CHEMBL4187427	TRUE
CC(C)n1nc(Cc2cc(F)cc(F)c2)c2c(N)ncnc21	CC(C)n1nc(Cc2cc(F)cc(Cl)c2)c2c(N)ncnc21	7.29371	8.33819	-1.04448	CHEMBL2330480	CHEMBL2330480	TRUE
CN(CC=Cc1ccccc1F)Cc1ccc2c(c1)OCCO2	CN(CC=Cc1ccccc1Cl)Cc1ccc2c(c1)OCCO2	6	7.04431	-1.04431	CHEMBL4255803	CHEMBL4255803	TRUE
Cn1c(N2CCNC(c3cccc(F)c3)C2)nc(-c2ccncn2)cc1=O	Cn1c(N2CCNC(c3cccc(Cl)c3)C2)nc(-c2ccncn2)cc1=O	7.92082	8.95861	-1.03779	CHEMBL4057861	CHEMBL4057861	TRUE
Oc1nc(SCc2cccc(F)c2)nc2ccccc12	Oc1nc(SCc2cccc(Cl)c2)nc2ccccc12	5.60206	6.63827	-1.03621	CHEMBL4276113	CHEMBL4276113	TRUE
CCN(Cc1cccs1)C(=O)COc1ccc(F)cc1	CCN(Cc1cccs1)C(=O)COc1ccc(Cl)cc1	6.37469	7.40894	-1.03425	CHEMBL4056645	CHEMBL4056645	TRUE
CC(=O)Nc1cc(-c2cc(F)c(OCC(N)CC(C)C)c(F)c2)ccn1	CC(=O)Nc1cc(-c2cc(F)c(OCC(N)CC(C)C)c(Cl)c2)ccn1	7.56864	8.60206	-1.03342	CHEMBL5161146	CHEMBL5161146	TRUE
O=C(Nc1ccc(F)cc1)NC1CCN(CCn2c(=O)ccc3ncc(F)cc32)CC1	O=C(Nc1ccc(Cl)cc1)NC1CCN(CCn2c(=O)ccc3ncc(F)cc32)CC1	5.50585	6.52288	-1.01703	CHEMBL3364655	CHEMBL3364655	TRUE
CCN(c1cc2oc(F)cc2c(C(=O)NCc2c(OC)cc(C)[nH]c2=O)c1C)C1CCOCC1	CCN(c1cc2oc(Cl)cc2c(C(=O)NCc2c(OC)cc(C)[nH]c2=O)c1C)C1CCOCC1	8.38722	9.39794	-1.01072	CHEMBL4144878	CHEMBL4144878	TRUE
COc1nn2cc(-c3ccc(F)cc3)nc2s1	COc1nn2cc(-c3ccc(Cl)cc3)nc2s1	6.39147	7.40001	-1.00853	CHEMBL3863813	CHEMBL3863813	TRUE
CCOc1ccc(-c2cc(NCC(O)c3ccccc3)ncn2)cc1F	CCOc1ccc(-c2cc(NCC(O)c3ccccc3)ncn2)cc1Cl	7.82391	8.82391	-1	CHEMBL3123527	CHEMBL3123527	TRUE
O=C(O)CCCN1C(=O)C(=Cc2ccc(-c3ccccc3F)o2)SC1=S	O=C(O)CCCN1C(=O)C(=Cc2ccc(-c3ccccc3Cl)o2)SC1=S	5.52288	6.52288	-1	CHEMBL2352238	CHEMBL2352238	TRUE
CC(C)S(=O)(=O)c1c(Cl)ccc(NC(=O)NC2CCC=C2F)c1O	CC(C)S(=O)(=O)c1c(Cl)ccc(NC(=O)NC2CCC=C2Cl)c1O	8	9	-1	CHEMBL4037524	CHEMBL4037524	TRUE
O=C(c1cccc(Cl)c1F)n1nc(OCCCN2CCCCC2)c2ccccc21	O=C(c1cccc(Cl)c1Cl)n1nc(OCCCN2CCCCC2)c2ccccc21	6.09691	7.09691	-1	CHEMBL4400975	CHEMBL4400975	TRUE
CC(C)Cc1ccc(C(C)C(=O)N2CCN(c3ccc(F)cc3)CC2)cc1	CC(C)Cc1ccc(C(C)C(=O)N2CCN(c3ccc(Cl)cc3)CC2)cc1	4.76955	5.76955	-1	CHEMBL4683850	CHEMBL4683850	TRUE
O=C(Nc1cccc(F)c1)c1cc(Br)ccc1OCc1ccccc1	O=C(Nc1cccc(Cl)c1)c1cc(Br)ccc1OCc1ccccc1	6.6	7.59998	-0.999983	CHEMBL4058537	CHEMBL4058537	TRUE
CCCCN1CCC(N(Cc2ccccc2)C(=O)Nc2cccc(F)c2)CC1	CCCCN1CCC(N(Cc2ccccc2)C(=O)Nc2cccc(Cl)c2)CC1	5.44733	6.44612	-0.998785	CHEMBL4024549	CHEMBL4024549	TRUE
Cc1ncsc1-c1ccc(CNC(=O)C2CC(O)CN2C(=O)C(NC(=O)COCCCOCCCCOCCCOc2ccc(Nc3ncc(F)c(NCCCN(C)C(=O)C4CCC4)n3)cc2)C(C)(C)C)cc1	Cc1ncsc1-c1ccc(CNC(=O)C2CC(O)CN2C(=O)C(NC(=O)COCCCOCCCCOCCCOc2ccc(Nc3ncc(Cl)c(NCCCN(C)C(=O)C4CCC4)n3)cc2)C(C)(C)C)cc1	6.98506	7.98297	-0.997907	CHEMBL4219631	CHEMBL4219631	TRUE
COc1cc(F)c2nc(-c3cc(C)cc4c(=O)n(C)cnc34)sc2c1	COc1cc(Cl)c2nc(-c3cc(C)cc4c(=O)n(C)cnc34)sc2c1	6.08092	7.07572	-0.994799	CHEMBL4843847	CHEMBL4843847	TRUE
CNCCC(Oc1ccc(F)cc1)c1ccccc1	CNCCC(Oc1ccc(Cl)cc1)c1ccccc1	6.2652	7.25964	-0.994437	CHEMBL4842937	CHEMBL4842937	TRUE
O=C(Nc1ccc2[nH]ccc2n1)c1ccc(Cl)c(F)c1	O=C(Nc1ccc2[nH]ccc2n1)c1ccc(Cl)c(Cl)c1	7.96019	8.95001	-0.989818	CHEMBL4385037	CHEMBL4385037	TRUE
COc1ccc2c(OC3CC4C(=O)N(C)CCCCC=CC5CC5(C(=O)NS(=O)(=O)C5(C)CC5)NC(=O)N4C3)cc(-c3nc(C(C)C)cs3)nc2c1F	COc1ccc2c(OC3CC4C(=O)N(C)CCCCC=CC5CC5(C(=O)NS(=O)(=O)C5(C)CC5)NC(=O)N4C3)cc(-c3nc(C(C)C)cs3)nc2c1Cl	6.26922	7.25181	-0.982594	CHEMBL3636991	CHEMBL3636991	TRUE
CCCS(=O)(=O)Nc1ccc(F)c(Nc2ccc3ncn(C)c(=O)c3c2)c1F	CCCS(=O)(=O)Nc1ccc(F)c(Nc2ccc3ncn(C)c(=O)c3c2)c1Cl	7.72125	8.69897	-0.977724	CHEMBL3240201	CHEMBL3240201	TRUE
Cc1ncnc2c1ccn2C1OC2C(Oc3ccc4cc(F)c(N)nc4c3)CCC2(O)C1O	Cc1ncnc2c1ccn2C1OC2C(Oc3ccc4cc(Cl)c(N)nc4c3)CCC2(O)C1O	7.42022	8.39794	-0.977724	CHEMBL4808435	CHEMBL4808435	TRUE
COc1ccc2c(C3CCc4ccc(F)cc43)ncnc2c1OC	COc1ccc2c(C3CCc4ccc(Cl)cc43)ncnc2c1OC	7.42022	8.39794	-0.977724	CHEMBL3602928	CHEMBL3602928	TRUE
CC(C)(C)c1ccc(CCNC(=O)c2ccc(O)cc2F)cc1	CC(C)(C)c1ccc(CCNC(=O)c2ccc(O)cc2Cl)cc1	5.05061	6.02228	-0.971666	CHEMBL4189162	CHEMBL4189162	TRUE
COc1nn2cc(-c3cccc(F)c3)nc2s1	COc1nn2cc(-c3cccc(Cl)c3)nc2s1	6.17	7.14002	-0.97002	CHEMBL3863813	CHEMBL3863813	TRUE
COc1cnc2c(c1)C(=O)c1c-2n(CCCNC2=NCCS2)c(=O)c2cc(F)ccc12	COc1cnc2c(c1)C(=O)c1c-2n(CCCNC2=NCCS2)c(=O)c2cc(Cl)ccc12	3.95468	4.92445	-0.969776	CHEMBL4040006	CHEMBL4040006	TRUE
Cc1c(-c2ccc(-c3cccnc3F)cc2)nc2ccccc2c1C(=O)O	Cc1c(-c2ccc(-c3cccnc3Cl)cc2)nc2ccccc2c1C(=O)O	6.29757	7.2652	-0.967631	CHEMBL4224224	CHEMBL4224224	TRUE
CC(C)(C)CN1CCC2(CC1)CN(c1ccccc1NC(=O)Nc1ccc(OC(F)(F)F)cc1)c1c(O)ccc(F)c12	CC(C)(C)CN1CCC2(CC1)CN(c1ccccc1NC(=O)Nc1ccc(OC(F)(F)F)cc1)c1c(O)ccc(Cl)c12	9.4318	10.3979	-0.966142	CHEMBL3292933	CHEMBL3292933	TRUE
OCC1CC(O)CCN1CCc1ccc(Nc2nc(-c3ccc(F)cc3)cs2)cc1	OCC1CC(O)CCN1CCc1ccc(Nc2nc(-c3ccc(Cl)cc3)cs2)cc1	5.92082	6.88606	-0.965238	CHEMBL2412222	CHEMBL2412222	TRUE
COc1cc(Nc2ccnc3ccc(F)cc23)cc(OC)c1OC	COc1cc(Nc2ccnc3ccc(Cl)cc23)cc(OC)c1OC	7.23657	8.20066	-0.964087	CHEMBL4667704	CHEMBL4667704	TRUE
Nc1nccc(-n2ccc3ccc(F)cc32)n1	Nc1nccc(-n2ccc3ccc(Cl)cc32)n1	4.46852	5.4318	-0.963277	CHEMBL2353290	CHEMBL2353290	TRUE
Cc1ccc(-c2nc(N)c3nn(Cc4ccccc4F)cc3n2)o1	Cc1ccc(-c2nc(N)c3nn(Cc4ccccc4Cl)cc3n2)o1	7.24413	8.20691	-0.962783	CHEMBL3802552	CHEMBL3802552	TRUE
O=C(O)c1cc(O)n(-c2ccc(F)cc2)n1	O=C(O)c1cc(O)n(-c2ccc(Cl)cc2)n1	4.60206	5.5632	-0.961141	CHEMBL5115882	CHEMBL5115882	TRUE
Cn1c(Cl)cnc1CNc1cc2sncc2cc1F	Cn1c(Cl)cnc1CNc1cc2sncc2cc1Cl	6.99	7.95001	-0.96001	CHEMBL4824105	CHEMBL4824105	TRUE
O=C(C=Cc1ccc(F)cc1)NCCC1CCN(Cc2ccccc2)CC1	O=C(C=Cc1ccc(Cl)cc1)NCCC1CCN(Cc2ccccc2)CC1	5.48149	6.44129	-0.959805	CHEMBL3821774	CHEMBL3821774	TRUE
O=C1CCC(CN(Cc2ccc(F)cc2)S(=O)(=O)c2cccc(F)c2)N1	O=C1CCC(CN(Cc2ccc(F)cc2)S(=O)(=O)c2cccc(Cl)c2)N1	5.14267	6.09691	-0.954243	CHEMBL3129655	CHEMBL3129655	TRUE
CN(CC=Cc1cccc(F)c1)Cc1ccc2c(c1)OCCO2	CN(CC=Cc1cccc(Cl)c1)Cc1ccc2c(c1)OCCO2	6	6.95234	-0.952336	CHEMBL4255803	CHEMBL4255803	TRUE
COc1cc(C=CC(=O)O)ccc1OCc1cn(-c2cccc(F)c2)nn1	COc1cc(C=CC(=O)O)ccc1OCc1cn(-c2cccc(Cl)c2)nn1	4.91222	5.86328	-0.951061	CHEMBL4620215	CHEMBL4620215	TRUE
Fc1ccc2c(CN3CCC(F)(F)C(CCc4ccccc4F)C3)c[nH]c2c1	Fc1ccccc1CCC1CN(Cc2c[nH]c3cc(Cl)ccc23)CCC1(F)F	6.3098	7.25964	-0.949833	CHEMBL3870251	CHEMBL3870251	TRUE
NC(=S)NN=C(COc1ccc(F)c(Cl)c1)c1ccc(Br)cc1	NC(=S)NN=C(COc1ccc(Cl)c(Cl)c1)c1ccc(Br)cc1	7.1549	8.09691	-0.942008	CHEMBL3614916	CHEMBL3614916	TRUE
O=C(c1ccc(Sc2cccc(F)c2)cc1)C1CCN(C(=O)c2cccc(O)c2)CC1	O=C(c1ccc(Sc2cccc(Cl)c2)cc1)C1CCN(C(=O)c2cccc(O)c2)CC1	7.30364	8.24413	-0.940482	CHEMBL4832170	CHEMBL4832170	TRUE
Cc1cc(CC(NC(=O)N2CCN(c3ccccc3F)CC2)C(=O)N2CCC(N3CCCCC3)CC2)cc2cn[nH]c12	Cc1cc(CC(NC(=O)N2CCN(c3ccccc3Cl)CC2)C(=O)N2CCC(N3CCCCC3)CC2)cc2cn[nH]c12	6.88606	7.82391	-0.937852	CHEMBL3773899	CHEMBL3773899	TRUE
N#Cc1ccc2ncn(CC3CCCC4(C3)CN(c3ccccc3F)C(=O)O4)c2c1	N#Cc1ccc2ncn(CC3CCCC4(C3)CN(c3ccccc3Cl)C(=O)O4)c2c1	6.26761	7.20066	-0.933053	CHEMBL4307491	CHEMBL4307491	TRUE
CC(C)(C)c1ccccc1N1CCN(CC(O)COCCOc2ccc(F)cc2)CC1	CC(C)(C)c1ccccc1N1CCN(CC(O)COCCOc2ccc(Cl)cc2)CC1	5.19246	6.12494	-0.932474	CHEMBL3129791	CHEMBL3129791	TRUE
Fc1ccc(CN2CCOC(COc3ccccc3)C2)cc1F	Fc1ccc(CN2CCOC(COc3ccccc3)C2)cc1Cl	6.27572	7.20761	-0.931884	CHEMBL3796307	CHEMBL3796307	TRUE
O=C1NC(Cc2ccc(O)c(F)c2)C(=O)NC1Cc1ccc(O)cc1	O=C1NC(Cc2ccc(O)c(Cl)c2)C(=O)NC1Cc1ccc(O)cc1	4.89279	5.82391	-0.931119	CHEMBL4323513	CHEMBL4323513	TRUE
O=S(=O)(Nc1cscn1)c1cc(Cl)c(OCC2NCCC=C2c2ccc(F)cc2F)cc1F	O=S(=O)(Nc1cscn1)c1cc(Cl)c(OCC2NCCC=C2c2ccc(F)cc2Cl)cc1F	5.83863	6.76955	-0.930919	CHEMBL4017759	CHEMBL4017759	TRUE
CN(C1=CC(=O)C(=O)c2ccccc21)c1ccc(F)cc1	CN(C1=CC(=O)C(=O)c2ccccc21)c1ccc(Cl)cc1	6.78781	7.7167	-0.928886	CHEMBL3998952	CHEMBL3998952	TRUE
CN(C)C(=O)c1ccc2c(c1)c(Sc1c(F)cccc1Cl)nn2-c1ccc(C(=O)O)cc1	CN(C)C(=O)c1ccc2c(c1)c(Sc1c(Cl)cccc1Cl)nn2-c1ccc(C(=O)O)cc1	5.30103	6.22915	-0.928118	CHEMBL3868203	CHEMBL3868203	TRUE
CC(C)N1C(=O)C(NC(=O)C(Cc2ccccc2F)NC(=O)c2ccc(F)cc2C(F)(F)F)CCc2cc(F)ccc21	CC(C)N1C(=O)C(NC(=O)C(Cc2ccccc2F)NC(=O)c2ccc(F)cc2C(F)(F)F)CCc2cc(Cl)ccc21	6.59517	7.52288	-0.927712	CHEMBL2396017	CHEMBL2396017	TRUE
CC1(C)Oc2ncnc(N)c2N=C1c1ccc(F)cc1	CC1(C)Oc2ncnc(N)c2N=C1c1ccc(Cl)cc1	5.48149	6.40894	-0.927449	CHEMBL3240807	CHEMBL3240807	TRUE
CC(=O)NCC(=O)N1CCC2(CC1)CCN(Cc1ccccc1F)c1ccccc1O2	CC(=O)NCC(=O)N1CCC2(CC1)CCN(Cc1ccccc1Cl)c1ccccc1O2	5	5.92082	-0.920819	CHEMBL2321360	CHEMBL2321360	TRUE
Cc1ccc(NC(=O)c2cccc(F)c2)cc1C(=O)Nc1cnc(Nc2cccc(N)c2)nc1	Cc1ccc(NC(=O)c2cccc(Cl)c2)cc1C(=O)Nc1cnc(Nc2cccc(N)c2)nc1	6.77989	7.69897	-0.919078	CHEMBL3296229	CHEMBL3296229	TRUE
O=C(On1c(-c2ccccc2)nc2ccccc2c1=O)c1cccc(F)c1	O=C(On1c(-c2ccccc2)nc2ccccc2c1=O)c1cccc(Cl)c1	4	4.91793	-0.917933	CHEMBL3428753	CHEMBL3428753	TRUE
CN1Cc2cc(-c3ccc(-c4cncc(NS(=O)(=O)c5cccc(F)c5)c4)s3)ccc2C1=O	CN1Cc2cc(-c3ccc(-c4cncc(NS(=O)(=O)c5cccc(Cl)c5)c4)s3)ccc2C1=O	4.69897	5.61618	-0.917215	CHEMBL4130818	CHEMBL4130818	TRUE
Cc1ccc(NC(=O)c2cccc(-n3cc(NC(=O)Nc4ccccc4F)cn3)c2)cn1	Cc1ccc(NC(=O)c2cccc(-n3cc(NC(=O)Nc4ccccc4Cl)cn3)c2)cn1	6.50446	7.42022	-0.915761	CHEMBL3372265	CHEMBL3372265	TRUE
Cc1c(-c2ccc(-c3cccnc3F)cc2)nc2ccc(F)cc2c1C(=O)O	Cc1c(-c2ccc(-c3cccnc3Cl)cc2)nc2ccc(F)cc2c1C(=O)O	7.10018	8.01278	-0.912601	CHEMBL4224224	CHEMBL4224224	TRUE
CC(=O)Nc1nc2ccc(F)cc2s1	CC(=O)Nc1nc2ccc(Cl)cc2s1	4.62709	5.5376	-0.910514	CHEMBL4673836	CHEMBL4673836	TRUE
COc1cc(N2Cc3ccc(-c4ccccc4F)nc3C2=O)ccc1OCCN1CCCC1	COc1cc(N2Cc3ccc(-c4ccccc4Cl)nc3C2=O)ccc1OCCN1CCCC1	5.38405	6.29243	-0.90838	CHEMBL2342870	CHEMBL2342870	TRUE
O=C1NC(=Nc2nnc(-c3ccc(Cl)cc3)s2)SC1=Cc1c(F)cccc1Cl	O=C1NC(=Nc2nnc(-c3ccc(Cl)cc3)s2)SC1=Cc1c(Cl)cccc1Cl	4.3439	5.25181	-0.90791	CHEMBL2438384	CHEMBL2438384	TRUE
O=C(Cc1ccc(F)cc1)Nc1ccccc1-c1cccc2c1[nH]c1ccccc12	O=C(Cc1ccc(Cl)cc1)Nc1ccccc1-c1cccc2c1[nH]c1ccccc12	4.30103	5.20761	-0.906578	CHEMBL4222715	CHEMBL4222715	TRUE
OC(COc1ccc(F)cc1)CN1CCN(Cc2c(F)cccc2Cl)CC1	OC(COc1ccc(Cl)cc1)CN1CCN(Cc2c(F)cccc2Cl)CC1	4.94386	5.84771	-0.903854	CHEMBL2339145	CHEMBL2339145	TRUE
CC(C)(CS(=O)(=O)c1ccc(-c2ccc(F)nc2)cc1)C(=O)NC(C#N)CC(N)=O	CC(C)(CS(=O)(=O)c1ccc(-c2ccc(Cl)nc2)cc1)C(=O)NC(C#N)CC(N)=O	7.01773	7.92082	-0.90309	CHEMBL4341724	CHEMBL4341724	TRUE
COc1ccc2c(OCC3CC4C(=O)N(C)CCCCC=CC5CC5(C(=O)NS(=O)(=O)C5(C)CC5)NC(=O)N34)cc(-c3nc(C(C)C)cs3)nc2c1F	COc1ccc2c(OCC3CC4C(=O)N(C)CCCCC=CC5CC5(C(=O)NS(=O)(=O)C5(C)CC5)NC(=O)N34)cc(-c3nc(C(C)C)cs3)nc2c1Cl	7.77469	8.67778	-0.90309	CHEMBL3362860	CHEMBL3362860	TRUE
NC1=NC2(c3cc(NC(=O)c4ccc(F)cn4)ccc3F)OCCC2CS1	NC1=NC2(c3cc(NC(=O)c4ccc(Cl)cn4)ccc3F)OCCC2CS1	6.79588	7.69897	-0.90309	CHEMBL3868309	CHEMBL3868309	TRUE
Cc1cn(C2CCCN(S(=O)(=O)c3ccc(O)c(Oc4cccc(F)c4)c3)C2)c(=O)[nH]c1=O	Cc1cn(C2CCCN(S(=O)(=O)c3ccc(O)c(Oc4cccc(Cl)c4)c3)C2)c(=O)[nH]c1=O	8.39794	9.30103	-0.90309	CHEMBL2342095	CHEMBL2342095	TRUE
N#Cc1ccc(Nc2nccc(NCc3ccc(F)cc3)n2)cc1	N#Cc1ccc(Nc2nccc(NCc3ccc(Cl)cc3)n2)cc1	6.41794	7.31876	-0.900822	CHEMBL3619838	CHEMBL3619838	TRUE
N#Cc1ccc(Nc2nccc(NCc3ccc(F)cc3)n2)cc1	N#Cc1ccc(Nc2nccc(NCc3ccc(Cl)cc3)n2)cc1	6.41794	7.31876	-0.900822	CHEMBL3619838	CHEMBL3619838	TRUE
Cc1cc(NCc2c(F)cccc2F)c2cccc(C(N)=O)c2n1	Cc1cc(NCc2c(F)cccc2Cl)c2cccc(C(N)=O)c2n1	5.20761	6.10791	-0.900297	CHEMBL3607749	CHEMBL3607749	TRUE
Oc1c(-c2nnc(Cc3ccc(F)cc3)[nH]2)ncc2cccnc12	Oc1c(-c2nnc(Cc3ccc(Cl)cc3)[nH]2)ncc2cccnc12	5.6	6.5	-0.899998	CHEMBL4621667	CHEMBL4621667	TRUE
Fc1ccc(-c2noc(CCCBr)n2)cc1	Clc1ccc(-c2noc(CCCBr)n2)cc1	4.70333	5.60206	-0.898725	CHEMBL4009913	CHEMBL4009913	TRUE
Cc1cc(-c2nc3c(Cl)cc(OCCNS(=O)(=O)c4ccc(F)cc4)cc3s2)c2ncn(C)c(=O)c2c1	Cc1cc(-c2nc3c(Cl)cc(OCCNS(=O)(=O)c4ccc(Cl)cc4)cc3s2)c2ncn(C)c(=O)c2c1	5.08513	5.98297	-0.897838	CHEMBL4843847	CHEMBL4843847	TRUE
COc1c(C(=O)N2CCN(CCCNC(=O)c3cc(O)c(O)c(O)c3)CC2)nc(Cc2ccc(F)cc2)n(C)c1=O	COc1c(C(=O)N2CCN(CCCNC(=O)c3cc(O)c(O)c(O)c3)CC2)nc(Cc2ccc(Cl)cc2)n(C)c1=O	4.72354	5.61979	-0.896251	CHEMBL3399229	CHEMBL3399229	TRUE
COc1c(C(=O)N2CCN(CCCNC(=O)c3cc(O)c(O)c(O)c3)CC2)nc(Cc2ccc(F)cc2)n(C)c1=O	COc1c(C(=O)N2CCN(CCCNC(=O)c3cc(O)c(O)c(O)c3)CC2)nc(Cc2ccc(Cl)cc2)n(C)c1=O	4.72354	5.61979	-0.896251	CHEMBL3399229	CHEMBL3399229	TRUE
CC1(C)CN2CCNCc3ccc(F)c1c32	CC1(C)CN2CCNCc3ccc(Cl)c1c32	7.29243	8.18709	-0.894657	CHEMBL4617350	CHEMBL4617350	TRUE
CC1(F)C(n2ccc(=O)[nH]c2=O)OC(F)(COP(=O)(O)OP(=O)(O)OP(=O)(O)O)C1O	CC1(Cl)C(n2ccc(=O)[nH]c2=O)OC(F)(COP(=O)(O)OP(=O)(O)OP(=O)(O)O)C1O	6.0655	6.95861	-0.893106	CHEMBL4394392	CHEMBL4394392	TRUE
Cc1cc(CNS(=O)(=O)c2ccc(F)cc2)c(C)o1	Cc1cc(CNS(=O)(=O)c2ccc(Cl)cc2)c(C)o1	4.61979	5.51286	-0.893073	CHEMBL4480546	CHEMBL4480546	TRUE
O=c1[nH]ccc2c(Nc3c(F)cc(F)cc3F)nc3ccncc3c12	O=c1[nH]ccc2c(Nc3c(F)cc(F)cc3Cl)nc3ccncc3c12	8.1549	9.04576	-0.890856	CHEMBL3131376	CHEMBL3131376	TRUE
COC(=O)C(CCC(=O)O)NC(=O)C(CC(=O)O)NC(=O)C(Cc1ccc2ccccc2c1)NC(=O)c1cc2cc(F)ccc2[nH]1	COC(=O)C(CCC(=O)O)NC(=O)C(CC(=O)O)NC(=O)C(Cc1ccc2ccccc2c1)NC(=O)c1cc2cc(Cl)ccc2[nH]1	3.45717	4.34679	-0.889613	CHEMBL4339580	CHEMBL4339580	TRUE
CCOC(=O)C1=C(CN2CCOCC2)NC(c2nccs2)=NC1c1ccc(F)cc1Cl	CCOC(=O)C1=C(CN2CCOCC2)NC(c2nccs2)=NC1c1ccc(Cl)cc1Cl	5.63639	6.52288	-0.886491	CHEMBL4028623	CHEMBL4028623	TRUE
CCCCOc1ccc(-c2ccc(C(=O)O)cc2F)cc1CNC(=O)c1ccc(C(F)(F)F)cc1	CCCCOc1ccc(-c2ccc(C(=O)O)cc2Cl)cc1CNC(=O)c1ccc(C(F)(F)F)cc1	7	7.88606	-0.886057	CHEMBL2416516	CHEMBL2416516	TRUE
Fc1ccc(CN2CCOC(COc3ccccc3)C2)cc1F	Fc1cc(CN2CCOC(COc3ccccc3)C2)ccc1Cl	6.27572	7.16115	-0.885427	CHEMBL3796307	CHEMBL3796307	TRUE
CS(=O)(=O)c1ccc(OC2c3cc(Cl)cc(F)c3CC2N2CCNCC2)cc1	CS(=O)(=O)c1ccc(OC2c3cc(Cl)cc(Cl)c3CC2N2CCNCC2)cc1	6.77469	7.65758	-0.882887	CHEMBL3861031	CHEMBL3861031	TRUE
Cc1ccc2oc(-c3cccc(NC(=S)Nc4ccc(F)cc4)c3)nc2c1	Cc1ccc2oc(-c3cccc(NC(=S)Nc4ccc(Cl)cc4)c3)nc2c1	5.07831	5.95861	-0.880294	CHEMBL4254710	CHEMBL4254710	TRUE
C#CCN(C)Cc1ccc(F)cc1Br	C#CCN(C)Cc1ccc(Cl)cc1Br	3.30103	4.18046	-0.879426	CHEMBL4387563	CHEMBL4387563	TRUE
NC(=O)c1c(NC(=O)c2ccccc2Cl)sc2c1CCN(Cc1ccccc1F)C2	NC(=O)c1c(NC(=O)c2ccccc2Cl)sc2c1CCN(Cc1ccccc1Cl)C2	4.66115	5.5376	-0.876457	CHEMBL4344500	CHEMBL4344500	TRUE
Nc1ccc(-c2ccc(OCc3ccc4ccccc4n3)cc2)c(-c2ccc(F)cc2)n1	Nc1ccc(-c2ccc(OCc3ccc4ccccc4n3)cc2)c(-c2ccc(Cl)cc2)n1	5.56223	6.43866	-0.876426	CHEMBL3635514	CHEMBL3635514	TRUE
COC(=O)C1=C(C(C)(C)C)NC(=S)NC1C=Cc1ccc(F)cc1	COC(=O)C1=C(C(C)(C)C)NC(=S)NC1C=Cc1ccc(Cl)cc1	4.30103	5.17718	-0.876148	CHEMBL4434241	CHEMBL4434241	TRUE
CN(C)CCOc1ccc(C(=C(CCCO)c2ccccc2)c2ccc(F)cc2)cc1	CN(C)CCOc1ccc(C(=C(CCCO)c2ccccc2)c2ccc(Cl)cc2)cc1	5.40894	6.284	-0.875061	CHEMBL3857086	CHEMBL3857086	TRUE
CCCC(C)Oc1ccc(C(=O)Nc2ccc3nc(SCC(=O)NC(C)c4ccccc4)sc3c2)c(F)c1	CCCC(C)Oc1ccc(C(=O)Nc2ccc3nc(SCC(=O)NC(C)c4ccccc4)sc3c2)c(Cl)c1	5	5.8729	-0.872895	CHEMBL4816214	CHEMBL4816214	TRUE
Fc1ccc(C2=NN(c3nc(-c4ccccc4)cs3)C(c3cccs3)C2)cc1	Clc1ccc(C2=NN(c3nc(-c4ccccc4)cs3)C(c3cccs3)C2)cc1	6.17393	7.04576	-0.871832	CHEMBL3371858	CHEMBL3371858	TRUE
Fc1ccc(C2=NN(c3nc(-c4ccccc4)cs3)C(c3cccs3)C2)cc1	Clc1ccc(C2=NN(c3nc(-c4ccccc4)cs3)C(c3cccs3)C2)cc1	6.17393	7.04576	-0.871832	CHEMBL3371858	CHEMBL3371858	TRUE
Cn1c(CCc2ccc(NC(=O)Nc3ccccc3F)cc2)nc2ccccc21	Cn1c(CCc2ccc(NC(=O)Nc3ccccc3Cl)cc2)nc2ccccc21	5.30103	6.17231	-0.871278	CHEMBL4308448	CHEMBL4308448	TRUE
CC(=O)c1cccc(OCc2ccc(F)cc2)c1	CC(=O)c1cccc(OCc2ccc(Cl)cc2)c1	7.06349	7.93181	-0.868328	CHEMBL3772179	CHEMBL3772179	TRUE
Fc1cccc2c1C1=NCCCN1C(=S)S2	S=C1Sc2cccc(Cl)c2C2=NCCCN12	4.30103	5.16749	-0.866461	CHEMBL4409766	CHEMBL4409766	TRUE
O=C(CCNC(=O)c1ccc(F)cc1)NC1CCCc2ccccc21	O=C(CCNC(=O)c1ccc(Cl)cc1)NC1CCCc2ccccc21	5.02228	5.88606	-0.86378	CHEMBL3865521	CHEMBL3865521	TRUE
C#CCN(C)CC(=C)c1ccc(F)c(F)c1	C#CCN(C)CC(=C)c1ccc(F)c(Cl)c1	5.30103	6.1549	-0.853872	CHEMBL3418529	CHEMBL3418529	TRUE
COc1cc(C(=O)c2c(-c3ccccc3)[nH]c3cc(F)ccc23)cc(OC)c1OC	COc1cc(C(=O)c2c(-c3ccccc3)[nH]c3cc(Cl)ccc23)cc(OC)c1OC	5	5.85387	-0.853872	CHEMBL3599631	CHEMBL3599631	TRUE
CN(C)CCCNc1nc(C=Cc2ccc(F)cc2)nc2cc3ccccc3cc12	CN(C)CCCNc1nc(C=Cc2ccc(Cl)cc2)nc2cc3ccccc3cc12	4.90309	5.75696	-0.853872	CHEMBL4315097	CHEMBL4315097	TRUE
O=C(O)c1ccc(-n2cc(C(=O)c3c(F)cccc3Cl)c3ccccc32)cc1	O=C(O)c1ccc(-n2cc(C(=O)c3c(Cl)cccc3Cl)c3ccccc32)cc1	6.70115	7.55284	-0.851695	CHEMBL4349913	CHEMBL4349913	TRUE
Cc1cnc(-c2ccc(F)cc2)n1Cc1ccccc1OCCCC(C)CC(=O)O	Cc1cnc(-c2ccc(Cl)cc2)n1Cc1ccccc1OCCCC(C)CC(=O)O	7.40894	8.25964	-0.850702	CHEMBL4721894	CHEMBL4721894	TRUE
COc1cc(N2Cc3ccc(-c4ccc(F)cc4)nc3C2=O)ccc1OCCN1CCCC1	COc1cc(N2Cc3ccc(-c4ccc(Cl)cc4)nc3C2=O)ccc1OCCN1CCCC1	5.50864	6.35655	-0.847909	CHEMBL2342870	CHEMBL2342870	TRUE
CN(CC=Cc1ccc(F)cc1)Cc1cccc2cc[nH]c12	CN(CC=Cc1ccc(Cl)cc1)Cc1cccc2cc[nH]c12	6	6.84588	-0.84588	CHEMBL4027654	CHEMBL4027654	TRUE
O=C(O)c1cccnc1Nc1ccc(F)cc1	O=C(O)c1cccnc1Nc1ccc(Cl)cc1	5.55284	6.39794	-0.845098	CHEMBL3865521	CHEMBL3865521	TRUE
CCOC(=O)C1=C(CN2CCOCC2C(=O)O)NC(c2nccs2)=NC1c1ccc(F)cc1F	CCOC(=O)C1=C(CN2CCOCC2C(=O)O)NC(c2nccs2)=NC1c1ccc(F)cc1Cl	7.85387	8.69897	-0.845098	CHEMBL4416859	CHEMBL4416859	TRUE
CC(O)C(N)C(=O)NCC=CCn1cnc2cc(Cl)c(F)cc2c1=O	CC(O)C(N)C(=O)NCC=CCn1cnc2cc(Cl)c(Cl)cc2c1=O	5.01323	5.85387	-0.840644	CHEMBL4403853	CHEMBL4403853	TRUE
COCCCCC(=NOCCN)c1ccc(Cl)c(F)c1	COCCCCC(=NOCCN)c1ccc(Cl)c(Cl)c1	7.20761	8.04576	-0.838149	CHEMBL4842937	CHEMBL4842937	TRUE
COc1cccc2cc[n+](-c3cccc(F)c3)cc12	COc1cccc2cc[n+](-c3cccc(Cl)c3)cc12	3.60206	4.4389	-0.836839	CHEMBL4770654	CHEMBL4770654	TRUE
CN1CCN(c2ccc(Nc3ncc4ncc(=O)n(-c5ccc(N)cc5)c4n3)cc2F)CC1	CN1CCN(c2ccc(Nc3ncc4ncc(=O)n(-c5ccc(N)cc5)c4n3)cc2Cl)CC1	7.44612	8.28067	-0.834552	CHEMBL4478225	CHEMBL4478225	TRUE
Cc1cccc2nc(-c3ccccc3F)[nH]c12	Cc1cccc2nc(-c3ccccc3Cl)[nH]c12	4.46852	5.30103	-0.832509	CHEMBL5128357	CHEMBL5128357	TRUE
O=C(Nc1ccc(F)cc1)NC1CCC(Oc2ccc(C(=O)O)cc2)CC1	O=C(Nc1ccc(Cl)cc1)NC1CCC(Oc2ccc(C(=O)O)cc2)CC1	5.33724	6.16749	-0.830249	CHEMBL4187626	CHEMBL4187626	TRUE
O=C(O)C1CC2CC(Oc3ccc(F)cc3-c3nnn[nH]3)CCC2CN1	O=C(O)C1CC2CC(Oc3ccc(Cl)cc3-c3nnn[nH]3)CCC2CN1	5.56864	6.39794	-0.829304	CHEMBL3089691	CHEMBL3089691	TRUE
CCCS(=O)(=O)Nc1ccc(F)c(C(=O)Nc2cnc3[nH]c(-c4ccc(F)cc4)nc3c2)c1F	CCCS(=O)(=O)Nc1ccc(F)c(C(=O)Nc2cnc3[nH]c(-c4ccc(Cl)cc4)nc3c2)c1F	5.97798	6.8041	-0.826116	CHEMBL2438528	CHEMBL2438528	TRUE
CC(=O)NCC1CNCCOC1c1ccc(Cl)c(F)c1	CC(=O)NCC1CNCCOC1c1ccc(Cl)c(Cl)c1	6	6.82391	-0.823909	CHEMBL3595874	CHEMBL3595874	TRUE
CC(=O)NCC1CNCCOC1c1ccc(Cl)c(F)c1	CC(=O)NCC1CNCCOC1c1ccc(Cl)c(Cl)c1	6	6.82391	-0.823909	CHEMBL3595874	CHEMBL3595874	TRUE
O=C(O)C(S)=Cc1c(F)cccc1F	O=C(O)C(S)=Cc1c(F)cccc1Cl	6.69897	7.52288	-0.823909	CHEMBL4121747	CHEMBL4121747	TRUE
CC1=C(c2ccc(F)cc2)C(c2ccc(OCCN3CC(CF)C3)cc2)Oc2ccc(O)c(F)c21	CC1=C(c2ccc(F)cc2)C(c2ccc(OCCN3CC(CF)C3)cc2)Oc2ccc(O)c(Cl)c21	9.69897	10.5229	-0.823909	CHEMBL4390558	CHEMBL4390558	TRUE
N#CC(CC(N)=O)NC(=O)C1CCCN1C(=O)OCc1ccc(-c2cccc(F)c2)cc1	N#CC(CC(N)=O)NC(=O)C1CCCN1C(=O)OCc1ccc(-c2cccc(Cl)c2)cc1	7.22185	8.04576	-0.823909	CHEMBL3267446	CHEMBL3267446	TRUE
NC1CCCCCC=CC2CC2(C(=O)NS(=O)(=O)C2CC2)NC(=O)C2CC(OC(=O)N3Cc4cccc(F)c4C3)CN2C1=O	NC1CCCCCC=CC2CC2(C(=O)NS(=O)(=O)C2CC2)NC(=O)C2CC(OC(=O)N3Cc4cccc(Cl)c4C3)CN2C1=O	7.69897	8.52288	-0.823909	CHEMBL3122260	CHEMBL3122260	TRUE
Cc1ccccc1Oc1cc(-n2c(=O)cc(C(F)(F)F)[nH]c2=O)c(F)cc1C#N	Cc1ccccc1Oc1cc(-n2c(=O)cc(C(F)(F)F)[nH]c2=O)c(Cl)cc1C#N	4.87615	5.69897	-0.822822	CHEMBL5217582	CHEMBL5217582	TRUE
OC(CN1CCN(c2ccccc2F)CC1)c1ccc(Br)cc1	OC(CN1CCN(c2ccccc2Cl)CC1)c1ccc(Br)cc1	4.78622	5.60889	-0.822672	CHEMBL3399742	CHEMBL3399742	TRUE
CCCOc1cc(=O)oc2cc(OCc3cccc(F)c3)ccc12	CCCOc1cc(=O)oc2cc(OCc3cccc(Cl)c3)ccc12	6.39	7.21	-0.819996	CHEMBL3096735	CHEMBL3096735	TRUE
COC(=O)c1ccccc1NC(=O)CSc1nc2cc(F)ccc2[nH]1	COC(=O)c1ccccc1NC(=O)CSc1nc2cc(Cl)ccc2[nH]1	5.48149	6.30103	-0.819544	CHEMBL4013545	CHEMBL4013545	TRUE
NCC(NC(=O)c1ccc(-c2ccc(F)cn2)[nH]1)c1nc(CO)cs1	NCC(NC(=O)c1ccc(-c2ccc(Cl)cn2)[nH]1)c1nc(CO)cs1	4.95861	5.76955	-0.810944	CHEMBL4404352	CHEMBL4404352	TRUE
CS(=O)(=O)c1ccc(OC2c3cc(F)ccc3CC2N2CCNCC2)cc1	CS(=O)(=O)c1ccc(OC2c3cc(Cl)ccc3CC2N2CCNCC2)cc1	5.45717	6.26761	-0.810432	CHEMBL3861031	CHEMBL3861031	TRUE
CC(C)n1nc(-c2cnc3[nH]cc(F)c3c2)cc1C1CCN(C2COC2)CC1	CC(C)n1nc(-c2cnc3[nH]cc(Cl)c3c2)cc1C1CCN(C2COC2)CC1	7.01773	7.82391	-0.80618	CHEMBL4119867	CHEMBL4119867	TRUE
Fc1ccc2c(CN3CCOC(COc4cccc(F)n4)C3)c[nH]c2c1	Fc1ccc2c(CN3CCOC(COc4cccc(Cl)n4)C3)c[nH]c2c1	7.11919	7.92445	-0.805267	CHEMBL3796307	CHEMBL3796307	TRUE
CCCS(=O)(=O)Nc1ccc(F)c(-c2cc3cnc4[nH]ncc4c3cc2OC)c1F	CCCS(=O)(=O)Nc1ccc(F)c(-c2cc3cnc4[nH]ncc4c3cc2OC)c1Cl	7.1549	7.95861	-0.803705	CHEMBL3755449	CHEMBL3755449	TRUE
Fc1ccc2c(-c3ccc4ccccc4n3)c[nH]c2c1F	Fc1ccc2c(-c3ccc4ccccc4n3)c[nH]c2c1Cl	6.72125	7.52288	-0.801632	CHEMBL4828552	CHEMBL4828552	TRUE
CC=CCn1cc(-c2ccc(C(=O)N3CCN(S(C)(=O)=O)CC3)c(F)c2)n2cncc2c1=O	CC=CCn1cc(-c2ccc(C(=O)N3CCN(S(C)(=O)=O)CC3)c(Cl)c2)n2cncc2c1=O	6.18575	6.98716	-0.80141	CHEMBL4481830	CHEMBL4481830	TRUE
Cc1ccc(NC(=O)c2ccc(CN3CCN(C)CC3)c(F)c2)cc1Nc1nccc(-c2cccnc2)n1	Cc1ccc(NC(=O)c2ccc(CN3CCN(C)CC3)c(Cl)c2)cc1Nc1nccc(-c2cccnc2)n1	7.19997	8	-0.800029	CHEMBL2379863	CHEMBL2379863	TRUE
Fc1cnc(Cl)nc1-n1ccc2ncccc21	Clc1ncc(Cl)c(-n2ccc3ncccc32)n1	5.9	6.69999	-0.799993	CHEMBL5149637	CHEMBL5149637	TRUE
CN(C)C(=O)C1C(O)C2(O)c3ncc(Cl)cc3OC2(c2ccc(F)cc2)C1c1ccccc1	CN(C)C(=O)C1C(O)C2(O)c3ncc(Cl)cc3OC2(c2ccc(Cl)cc2)C1c1ccccc1	6	6.79588	-0.79588	CHEMBL4616466	CHEMBL4616466	TRUE
Fc1cc(C(Cn2ccnc2)OCc2nc3ccccc3s2)ccc1Cl	Clc1ccc(C(Cn2ccnc2)OCc2nc3ccccc3s2)cc1Cl	5.20761	6	-0.792392	CHEMBL4724360	CHEMBL4724360	TRUE
CNCCC(Oc1ccc(Cl)c(F)c1)c1ccccc1	CNCCC(Oc1ccc(Cl)c(Cl)c1)c1ccccc1	7.50864	8.30103	-0.792392	CHEMBL4842937	CHEMBL4842937	TRUE
COc1ccc(S(=O)(=O)n2ccc3ccc(F)cc32)cc1N1CCNCC1	COc1ccc(S(=O)(=O)n2ccc3ccc(Cl)cc32)cc1N1CCNCC1	8.88606	9.67778	-0.791724	CHEMBL5118310	CHEMBL5118310	TRUE
COc1ccccc1S(=O)(=O)C=Cc1ncccc1F	COc1ccccc1S(=O)(=O)C=Cc1ncccc1Cl	6.057	6.84771	-0.790711	CHEMBL4331808	CHEMBL4331808	TRUE
O=C(CCCN1CCC(O)(c2ccc(F)cc2)CC1)c1ccc(F)cc1	O=C(CCCN1CCC(O)(c2ccc(Cl)cc2)CC1)c1ccc(F)cc1	8.51999	9.30998	-0.789988	CHEMBL4416273	CHEMBL4416273	TRUE
CNCC(O)CN1CCc2c(cccc2OCc2ccc(F)cc2)C1	CNCC(O)CN1CCc2c(cccc2OCc2ccc(Cl)cc2)C1	6.64207	7.4318	-0.789733	CHEMBL4398063	CHEMBL4398063	TRUE
O=S(=O)(C=Cc1cccc(Cl)n1)c1ccccc1F	O=S(=O)(C=Cc1cccc(Cl)n1)c1ccccc1Cl	6.04672	6.83268	-0.785959	CHEMBL4712767	CHEMBL4712767	TRUE
O=C(O)Cc1ccc(Nc2nc(-c3cccc(F)c3)nc(C3CC3)n2)cc1	O=C(O)Cc1ccc(Nc2nc(-c3cccc(Cl)c3)nc(C3CC3)n2)cc1	5.84254	6.62525	-0.782708	CHEMBL3362239	CHEMBL3362239	TRUE
NC1CCCN(c2cc(Nc3cc(F)ccn3)n3nccc3n2)C1	NC1CCCN(c2cc(Nc3cc(Cl)ccn3)n3nccc3n2)C1	4.84164	5.61979	-0.778151	CHEMBL4711280	CHEMBL4711280	TRUE
Cc1nc2sc(-c3ccc(F)cc3)nc2c(=O)[nH]1	Cc1nc2sc(-c3ccc(Cl)cc3)nc2c(=O)[nH]1	6.97062	7.74473	-0.774111	CHEMBL3418856	CHEMBL3418856	TRUE
COC(=O)C(c1ccc(F)cc1)n1ccc2c(NS(C)(=O)=O)cccc21	COC(=O)C(c1ccc(Cl)cc1)n1ccc2c(NS(C)(=O)=O)cccc21	5	5.76955	-0.769551	CHEMBL4717253	CHEMBL4717253	TRUE
Nc1c2c(nc3c1C(c1ccc(F)cc1)NC(=S)N3)CCCC2	Nc1c2c(nc3c1C(c1ccc(Cl)cc1)NC(=S)N3)CCCC2	4.50864	5.27737	-0.768728	CHEMBL4156282	CHEMBL4156282	TRUE
O=S(=O)(C=Cc1ncccc1F)c1ccccc1F	O=S(=O)(C=Cc1ncccc1Cl)c1ccccc1F	6.75449	7.52288	-0.768391	CHEMBL4712767	CHEMBL4712767	TRUE
COc1cc(Nc2ccnc3cc(F)ccc23)cc(OC)c1OC	COc1cc(Nc2ccnc3cc(Cl)ccc23)cc(OC)c1OC	7.11919	7.88606	-0.76687	CHEMBL4667704	CHEMBL4667704	TRUE
O=C(Nc1ccc(F)cc1)Nc1ccc(CNc2nc3ccc(OCCN4CCOCC4)cc3s2)cc1	O=C(Nc1ccc(Cl)cc1)Nc1ccc(CNc2nc3ccc(OCCN4CCOCC4)cc3s2)cc1	6.1549	6.92082	-0.765917	CHEMBL4036222	CHEMBL4036222	TRUE
COC(=N)c1nc2ccc3ncnc(Nc4ccc(Cl)cc4F)c3c2s1	COC(=N)c1nc2ccc3ncnc(Nc4ccc(Cl)cc4Cl)c3c2s1	8.78781	9.55284	-0.76503	CHEMBL5127028	CHEMBL5127028	TRUE
Fc1ccc(OCc2ccc(I)cc2)cc1	Clc1ccc(OCc2ccc(I)cc2)cc1	6.97001	7.73002	-0.760012	CHEMBL3363288	CHEMBL3363288	TRUE
CC(=O)Nc1ncc(CN2CCN(CC(=O)Nc3ccc(F)cc3)CC2C)s1	CC(=O)Nc1ncc(CN2CCN(CC(=O)Nc3ccc(Cl)cc3)CC2C)s1	6.63827	7.39794	-0.759668	CHEMBL5115654	CHEMBL5115654	TRUE
COc1ccc(CNc2nn(C3CCCC3)c3ccc(C(F)(F)F)cc23)cc1F	COc1ccc(CNc2nn(C3CCCC3)c3ccc(C(F)(F)F)cc23)cc1Cl	5.25964	6.01773	-0.758091	CHEMBL4398699	CHEMBL4398699	TRUE
Cc1ccoc1C(=O)Nc1ccc(N2C(=O)c3cccc(F)c3C2=O)nc1	Cc1ccoc1C(=O)Nc1ccc(N2C(=O)c3cccc(Cl)c3C2=O)nc1	6.70333	7.46005	-0.756711	CHEMBL3635102	CHEMBL3635102	TRUE
O=C(NNS(=O)(=O)c1ccccc1)c1cccc(F)c1F	O=C(NNS(=O)(=O)c1ccccc1)c1cccc(Cl)c1F	6.13077	6.88606	-0.755288	CHEMBL4374936	CHEMBL4374936	TRUE
Fc1ccc(-c2nc3ccc(Nc4ccnc5ccccc45)cc3[nH]2)cc1	Clc1ccc(-c2nc3ccc(Nc4ccnc5ccccc45)cc3[nH]2)cc1	5.86646	6.61979	-0.753328	CHEMBL3373860	CHEMBL3373860	TRUE
C=CC(=O)N(c1ccc(F)c(F)c1)c1ncnc2cc(OC)c(OCCCN3CCOCC3)cc12	C=CC(=O)N(c1ccc(F)c(Cl)c1)c1ncnc2cc(OC)c(OCCCN3CCOCC3)cc12	6.43415	7.18575	-0.7516	CHEMBL4385373	CHEMBL4385373	TRUE
CC(=O)c1cccc(OCc2cccc(F)c2)c1	CC(=O)c1cccc(OCc2cccc(Cl)c2)c1	6.71444	7.46597	-0.751531	CHEMBL3772179	CHEMBL3772179	TRUE
Cn1cc2cc(C(=O)Nc3ccc(F)c(Cl)c3)ccc2n1	Cn1cc2cc(C(=O)Nc3ccc(Cl)c(Cl)c3)ccc2n1	8.09002	8.84013	-0.750116	CHEMBL3996822	CHEMBL3996822	TRUE
COP(=O)(Nc1cc(-c2ccc(F)cc2)sc1C(=O)O)c1ccc(C)cc1C	COP(=O)(Nc1cc(-c2ccc(Cl)cc2)sc1C(=O)O)c1ccc(C)cc1C	6.92812	7.67778	-0.749663	CHEMBL4432408	CHEMBL4432408	TRUE
CS(=O)(=O)c1ccc(OC2c3cc(F)cc(Cl)c3CC2N2CCNCC2)cc1	CS(=O)(=O)c1ccc(OC2c3cc(Cl)cc(Cl)c3CC2N2CCNCC2)cc1	6.91009	7.65758	-0.747482	CHEMBL3861031	CHEMBL3861031	TRUE
O=c1c2c(F)ccn2nc(C2CCCN2c2ncnc3[nH]cnc23)n1-c1ccccc1	O=c1c2c(Cl)ccn2nc(C2CCCN2c2ncnc3[nH]cnc23)n1-c1ccccc1	7.17393	7.92082	-0.746894	CHEMBL4352638	CHEMBL4352638	TRUE
CCCC(C)N1CCC(N(Cc2ccccc2)C(=O)Nc2cccc(F)c2)CC1	CCCC(C)N1CCC(N(Cc2ccccc2)C(=O)Nc2cccc(Cl)c2)CC1	5.77211	6.51713	-0.745013	CHEMBL4024549	CHEMBL4024549	TRUE
O=c1[nH]c2ncccc2n1-c1nc(N2CCCNCC2)ccc1F	O=c1[nH]c2ncccc2n1-c1nc(N2CCCNCC2)ccc1Cl	7	7.74473	-0.744727	CHEMBL4017958	CHEMBL4017958	TRUE
Fc1ccc2nc(-c3ccco3)c(-c3ccco3)nc2c1	Clc1ccc2nc(-c3ccco3)c(-c3ccco3)nc2c1	4	4.74232	-0.742321	CHEMBL4273921	CHEMBL4273921	TRUE
O=C(Nc1ccc(F)cc1)Nc1ccc(N=C2C(=O)Nc3ccc(Cl)cc32)cc1	O=C(Nc1ccc(Cl)cc1)Nc1ccc(N=C2C(=O)Nc3ccc(Cl)cc32)cc1	5.40671	6.14874	-0.742028	CHEMBL3590864	CHEMBL3590864	TRUE
C=CC(=O)N1CCN(c2nc(=O)n(-c3c(C)cccc3C(C)C)c3nc(-c4c(O)cccc4F)c(F)cc23)C(C)C1	C=CC(=O)N1CCN(c2nc(=O)n(-c3c(C)cccc3C(C)C)c3nc(-c4c(O)cccc4F)c(Cl)cc23)C(C)C1	7.95861	8.69897	-0.740363	CHEMBL4357260	CHEMBL4357260	TRUE
CCOC(=O)C1=C(CN2CCOCC2C(=O)O)NC(c2nccs2)=NC1c1ccc(F)c(F)c1	CCOC(=O)C1=C(CN2CCOCC2C(=O)O)NC(c2nccs2)=NC1c1ccc(Cl)c(F)c1	7.95861	8.69897	-0.740363	CHEMBL4416859	CHEMBL4416859	TRUE
O=S(=O)(C=Cc1ncccc1F)c1cccc(Cl)c1	O=S(=O)(C=Cc1ncccc1Cl)c1cccc(Cl)c1	6.5986	7.33724	-0.738643	CHEMBL4712767	CHEMBL4712767	TRUE
O=C1C(O)=C(Nc2ccc(F)cc2)C(=O)c2ccccc21	O=C1C(O)=C(Nc2ccc(Cl)cc2)C(=O)c2ccccc21	6	6.73283	-0.732828	CHEMBL4390974	CHEMBL4390974	TRUE
Cc1nccn1-c1ccc(CNS(=O)(=O)c2ccccc2F)cc1	Cc1nccn1-c1ccc(CNS(=O)(=O)c2ccccc2Cl)cc1	5.73424	6.46597	-0.731735	CHEMBL3090522	CHEMBL3090522	TRUE
CCn1cnc2c(-c3nc4c(F)cc(OC)cc4s3)cc(C)cc2c1=O	CCn1cnc2c(-c3nc4c(Cl)cc(OC)cc4s3)cc(C)cc2c1=O	5.00218	5.73283	-0.730651	CHEMBL4843847	CHEMBL4843847	TRUE
Fc1ccccc1C1=NOC(Cc2ccccc2)O1	Clc1ccccc1C1=NOC(Cc2ccccc2)O1	8.55006	9.28001	-0.729947	CHEMBL2327197	CHEMBL2327197	TRUE
CCC1(CC(=O)O)CCc2cc(-c3ccc(NC(=O)Nc4cccc(F)c4)cc3)ccc2C1=O	CCC1(CC(=O)O)CCc2cc(-c3ccc(NC(=O)Nc4cccc(Cl)c4)cc3)ccc2C1=O	7.49485	8.22185	-0.726999	CHEMBL4144917	CHEMBL4144917	TRUE
C=CC(=O)N1CCN(c2nc(=O)n(-c3c(C(C)C)ccnc3C)c3nc(-c4c(O)cccc4F)c(F)cc23)C(C)C1	C=CC(=O)N1CCN(c2nc(=O)n(-c3c(C(C)C)ccnc3C)c3nc(-c4c(O)cccc4F)c(Cl)cc23)C(C)C1	7.79588	8.52288	-0.726999	CHEMBL4357260	CHEMBL4357260	TRUE
CC(=O)N1N=C(NC2=NC(=O)C(=Cc3ccccc3F)S2)SC1(C)c1ccccc1	CC(=O)N1N=C(NC2=NC(=O)C(=Cc3ccccc3Cl)S2)SC1(C)c1ccccc1	4.1549	4.87943	-0.724524	CHEMBL4234988	CHEMBL4234988	TRUE
Cc1c(C(=O)Nc2ccc(Oc3ncnc4[nH]cc(-c5ccccc5)c34)c(F)c2)c(=O)c2cc(F)ccc2n1C	Cc1c(C(=O)Nc2ccc(Oc3ncnc4[nH]cc(-c5ccccc5)c34)c(F)c2)c(=O)c2cc(Cl)ccc2n1C	5	5.72354	-0.723538	CHEMBL4426892	CHEMBL4426892	TRUE
CNCCC(Oc1cccc(F)c1)c1ccccc1	CNCCC(Oc1cccc(Cl)c1)c1ccccc1	6.45717	7.18046	-0.723281	CHEMBL4842937	CHEMBL4842937	TRUE
CN1CCC(N2CCC(NC(=O)c3ccc(COc4ccc(F)cc4)cc3)C2)CC1	CN1CCC(N2CCC(NC(=O)c3ccc(COc4ccc(Cl)cc4)cc3)C2)CC1	5.63451	6.35655	-0.722035	CHEMBL3390091	CHEMBL3390091	TRUE
CCOC(=O)C1=C(CN2CCOCC2)NC(c2nccs2)=NC1c1ccc(F)cc1F	CCOC(=O)C1=C(CN2CCOCC2)NC(c2nccs2)=NC1c1ccc(F)cc1Cl	7.58503	8.30103	-0.716003	CHEMBL4177855	CHEMBL4177855	TRUE
CC(C)(CS(=O)(=O)c1ccc(-c2cncc(F)c2)cc1)C(=O)NC(C#N)CC(N)=O	CC(C)(CS(=O)(=O)c1ccc(-c2cncc(Cl)c2)cc1)C(=O)NC(C#N)CC(N)=O	7.10791	7.82391	-0.716003	CHEMBL4341724	CHEMBL4341724	TRUE
CC(=O)Nc1cc(-c2ccc(OCC(N)CC(C)C)c(F)c2)ccn1	CC(=O)Nc1cc(-c2ccc(OCC(N)CC(C)C)c(Cl)c2)ccn1	8.58503	9.30103	-0.716003	CHEMBL5161145	CHEMBL5161145	TRUE
O=C(O)C1CCCN(CCCC=Cc2ccccc2-c2ccc(F)cc2Cl)C1	O=C(O)C1CCCN(CCCC=Cc2ccccc2-c2ccc(Cl)cc2Cl)C1	5.399	6.114	-0.715	CHEMBL2317558	CHEMBL2317558	TRUE
Cc1cccn2c(=O)cc(CSc3nnc(NC(=O)Nc4cccc(F)c4)s3)nc12	Cc1cccn2c(=O)cc(CSc3nnc(NC(=O)Nc4cccc(Cl)c4)s3)nc12	5	5.71377	-0.713768	CHEMBL4308449	CHEMBL4308449	TRUE
Nc1ncnc2c1c(-c1ccc(F)cc1)nn2CC(Cl)c1ccccc1	Nc1ncnc2c1c(-c1ccc(Cl)cc1)nn2CC(Cl)c1ccccc1	6.4437	7.1549	-0.711204	CHEMBL3580016	CHEMBL3580016	TRUE
CC(C)Oc1ccc(Nc2nc(=O)n(CCC(=O)O)c(=O)n2Cc2ccc(Cl)cc2)cc1F	CC(C)Oc1ccc(Nc2nc(=O)n(CCC(=O)O)c(=O)n2Cc2ccc(Cl)cc2)cc1Cl	7.18046	7.88606	-0.705601	CHEMBL4737205	CHEMBL4737205	TRUE
O=C(Nc1cccc(F)c1)Nc1nc(-c2cc3ccccc3o2)cs1	O=C(Nc1cccc(Cl)c1)Nc1nc(-c2cc3ccccc3o2)cs1	4.30989	5.01457	-0.704681	CHEMBL3619983	CHEMBL3619983	TRUE
Cn1c(N2CCNC(c3ccc(F)cc3)C2)nc(-c2ccncn2)cc1=O	Cn1c(N2CCNC(c3ccc(Cl)cc3)C2)nc(-c2ccncn2)cc1=O	8.0655	8.76955	-0.70405	CHEMBL4057861	CHEMBL4057861	TRUE
COc1cc(F)c(CN2C(=O)N(c3ccc(OC)c(OC)c3)S(=O)(=O)c3ccccc32)c(F)c1	COc1cc(F)c(CN2C(=O)N(c3ccc(OC)c(OC)c3)S(=O)(=O)c3ccccc32)c(Cl)c1	9.29999	10	-0.700011	CHEMBL3742876	CHEMBL3742876	TRUE
CCOC(=O)CN1C(=O)SC(=Cc2ccc(-c3cc(C(=O)O)ccc3F)o2)C1=O	CCOC(=O)CN1C(=O)SC(=Cc2ccc(-c3cc(C(=O)O)ccc3Cl)o2)C1=O	4	4.7	-0.7	CHEMBL4430907	CHEMBL4430907	TRUE
Cc1nc(CN2CCC(OCc3ccc(F)c(F)c3)CC2)c2ccccn12	Cc1nc(CN2CCC(OCc3ccc(Cl)c(F)c3)CC2)c2ccccn12	6.32	7.02	-0.699997	CHEMBL5145660	CHEMBL5145660	TRUE
Nc1nc(NCc2ccc(F)cc2)c2ccccc2n1	Nc1nc(NCc2ccc(Cl)cc2)c2ccccc2n1	5.50864	6.20761	-0.69897	CHEMBL3817084	CHEMBL3817084	TRUE
O=C(c1ccc(-c2ccc(F)cc2)cc1)N1CCN(c2ncccn2)CC1	O=C(c1ccc(-c2ccc(Cl)cc2)cc1)N1CCN(c2ncccn2)CC1	6.58503	7.284	-0.69897	CHEMBL3370229	CHEMBL3370229	TRUE
CCOc1ccc(-c2cnc(NC)c(C(=O)c3ccc(F)cc3)c2)cc1	CCOc1ccc(-c2cnc(NC)c(C(=O)c3ccc(Cl)cc3)c2)cc1	5.72125	6.42022	-0.69897	CHEMBL2447428	CHEMBL2447428	TRUE
CCNCCCn1c2c(c3ccc(F)cc3c1=O)C(=O)c1cc(OC)cnc1-2	CCNCCCn1c2c(c3ccc(Cl)cc3c1=O)C(=O)c1cc(OC)cnc1-2	3.95468	4.65365	-0.69897	CHEMBL4040006	CHEMBL4040006	TRUE
Nc1nc(N)c2c(COc3cccc(F)c3)cccc2n1	Nc1nc(N)c2c(COc3cccc(Cl)c3)cccc2n1	9.60206	10.301	-0.69897	CHEMBL4010335	CHEMBL4010335	TRUE
O=c1[nH]nc2ccc(Sc3cccc(F)c3)nn12	O=c1[nH]nc2ccc(Sc3cccc(Cl)c3)nn12	7.52288	8.22185	-0.69897	CHEMBL5041229	CHEMBL5041229	TRUE
O=C(O)c1cc2sc(Nc3ccc(F)cc3)nc2cc1O	O=C(O)c1cc2sc(Nc3ccc(Cl)cc3)nc2cc1O	4.18709	4.88606	-0.69897	CHEMBL3598586	CHEMBL3598586	TRUE
CC(=O)Oc1ccc(C(c2ccc(F)cc2)c2cccc[n+]2[O-])cc1	CC(=O)Oc1ccc(C(c2ccc(Cl)cc2)c2cccc[n+]2[O-])cc1	3	3.69897	-0.69897	CHEMBL4711205	CHEMBL4711205	TRUE
NC(=O)c1c(NC(=O)c2ccccc2Cl)sc2c1CCN(C(=S)Nc1ccccc1F)C2	NC(=O)c1c(NC(=O)c2ccccc2Cl)sc2c1CCN(C(=S)Nc1ccccc1Cl)C2	4.89997	5.59346	-0.693486	CHEMBL4344501	CHEMBL4344501	TRUE
CC(Nc1ncnc2[nH]cnc12)c1nn(-c2cccnc2)c2cc(F)ccc12	CC(Nc1ncnc2[nH]cnc12)c1nn(-c2cccnc2)c2cc(Cl)ccc12	7.42022	8.11351	-0.693293	CHEMBL5159594	CHEMBL5159594	TRUE
CC(=O)Nc1ccc(S(=O)(=O)Nc2ccc(Oc3ccc(Cl)c(F)c3)c(C#N)c2)cc1	CC(=O)Nc1ccc(S(=O)(=O)Nc2ccc(Oc3ccc(Cl)c(Cl)c3)c(C#N)c2)cc1	6.65365	7.34679	-0.69314	CHEMBL4027199	CHEMBL4027199	TRUE
COc1cccc(-c2cn3cc(-c4ccc(F)cc4)ccc3n2)c1	COc1cccc(-c2cn3cc(-c4ccc(Cl)cc4)ccc3n2)c1	6.45593	7.14752	-0.691588	CHEMBL4405768	CHEMBL4405768	TRUE
Cc1nc2ccccc2c(-c2ccc(F)cc2)c1C(OC(C)(C)C)C(=O)O	Cc1nc2ccccc2c(-c2ccc(Cl)cc2)c1C(OC(C)(C)C)C(=O)O	6.3098	7	-0.690196	CHEMBL4269517	CHEMBL4269517	TRUE
C=CC(=O)NCCCC[CH](NC(=O)Cc1cccc(F)c1)C(=O)N1CCN(C(=O)c2cccc3ccccc23)CC1	C=CC(=O)NCCCC[CH](NC(=O)Cc1cccc(Cl)c1)C(=O)N1CCN(C(=O)c2cccc3ccccc23)CC1	5.3098	6	-0.690196	CHEMBL5158930	CHEMBL5158930	TRUE
CC(C)(O)CNC(=O)c1cc(NC(=O)c2cc(-c3ncccc3F)c(F)cc2Cl)n(-c2ccccc2)n1	CC(C)(O)CNC(=O)c1cc(NC(=O)c2cc(-c3ncccc3F)c(Cl)cc2Cl)n(-c2ccccc2)n1	7.63827	8.3279	-0.68963	CHEMBL4309191	CHEMBL4309191	TRUE
O=c1cc(-c2ccc(F)cc2)oc2cc(Br)cc(Br)c12	O=c1cc(-c2ccc(Cl)cc2)oc2cc(Br)cc(Br)c12	7.68825	8.37675	-0.688505	CHEMBL4714274	CHEMBL4714274	TRUE
Cc1cc(CC(NC(=O)N2CCN(c3ccc(S(C)(=O)=O)cc3F)CC2)C(=O)N2CCC(N3CCCCC3)CC2)cc2cn[nH]c12	Cc1cc(CC(NC(=O)N2CCN(c3ccc(S(C)(=O)=O)cc3Cl)CC2)C(=O)N2CCC(N3CCCCC3)CC2)cc2cn[nH]c12	7.46852	8.1549	-0.686381	CHEMBL3773899	CHEMBL3773899	TRUE
O=C1NC2(CO1)CC(C(=O)N1CC(OCc3ccc(F)cc3Cl)C1)C2	O=C1NC2(CO1)CC(C(=O)N1CC(OCc3ccc(Cl)cc3Cl)C1)C2	7.46852	8.1549	-0.686381	CHEMBL4810578	CHEMBL4810578	TRUE
O=C(Cc1ccccc1F)Nc1onc(-c2ccc(F)cc2)c1-c1ccncn1	O=C(Cc1ccccc1Cl)Nc1onc(-c2ccc(F)cc2)c1-c1ccncn1	7.47886	8.16241	-0.68355	CHEMBL3370278	CHEMBL3370278	TRUE
Nc1ncnc2c1nc(F)n2C1CCC(O)C1O	Nc1ncnc2c1nc(Cl)n2C1CCC(O)C1O	5	5.67778	-0.677781	CHEMBL3294636	CHEMBL3294636	TRUE
CN(C)Cc1ccc(-c2cc3c(F)cccc3c(=O)[nH]2)cc1	CN(C)Cc1ccc(-c2cc3c(Cl)cccc3c(=O)[nH]2)cc1	5.76195	6.4389	-0.676945	CHEMBL3766280	CHEMBL3766280	TRUE
O=C(Nc1cccc(F)c1)Nc1cccnc1Oc1cccc(C(F)(F)F)c1	O=C(Nc1cccc(Cl)c1)Nc1cccnc1Oc1cccc(C(F)(F)F)c1	6.21681	6.89279	-0.675979	CHEMBL2339550	CHEMBL2339550	TRUE
COc1ccc(C=CC=CC(=O)c2cc(F)ccc2O)cc1	COc1ccc(C=CC=CC(=O)c2cc(Cl)ccc2O)cc1	6.13911	6.81491	-0.6758	CHEMBL2342563	CHEMBL2342563	TRUE
NCCc1ccc(-c2cccc(F)c2)cc1	NCCc1ccc(-c2cccc(Cl)c2)cc1	5	5.67572	-0.675718	CHEMBL4182524	CHEMBL4182524	TRUE
O=C(Nc1ccc(F)cc1)C1(c2ccc3c(n2)CCN3c2ccccn2)CCC1	O=C(Nc1ccc(Cl)cc1)C1(c2ccc3c(n2)CCN3c2ccccn2)CCC1	7.96257	8.63827	-0.675699	CHEMBL4813761	CHEMBL4813761	TRUE
COc1ccc(CNC(=O)c2cc(-c3cc(F)cc(F)c3)cnc2-c2cccnc2)cc1OC	COc1ccc(CNC(=O)c2cc(-c3cc(F)cc(Cl)c3)cnc2-c2cccnc2)cc1OC	5.28819	5.96377	-0.675578	CHEMBL3101094	CHEMBL3101094	TRUE
Fc1cccc(CN2CCN(c3nnc(Nc4ccc(N5CCOCC5)cc4)c4ccccc34)CC2)c1	Clc1cccc(CN2CCN(c3nnc(Nc4ccc(N5CCOCC5)cc4)c4ccccc34)CC2)c1	5.13253	5.80688	-0.674343	CHEMBL4832361	CHEMBL4832361	TRUE
O=C(CC(O)c1ccccc1F)NO	O=C(CC(O)c1ccccc1Cl)NO	5.25181	5.92445	-0.672641	CHEMBL2428642	CHEMBL2428642	TRUE
COc1cc(=O)oc2cc(OCc3cccc(F)c3)ccc12	COc1cc(=O)oc2cc(OCc3cccc(Cl)c3)ccc12	7.43997	8.11003	-0.670053	CHEMBL3096735	CHEMBL3096735	TRUE
O=C(CCCCCCN1C(=O)C(=C2Nc3ccccc3C2=NO)c2cc(F)ccc21)NO	O=C(CCCCCCN1C(=O)C(=C2Nc3ccccc3C2=NO)c2cc(Cl)ccc21)NO	7.85387	8.52288	-0.669007	CHEMBL4702018	CHEMBL4702018	TRUE
COc1ccc(S(=O)(=O)n2cc(C)c3ccc(F)cc32)cc1N1CCNCC1	COc1ccc(S(=O)(=O)n2cc(C)c3ccc(Cl)cc32)cc1N1CCNCC1	9.07572	9.74473	-0.669007	CHEMBL5118310	CHEMBL5118310	TRUE
CS(=O)(=O)Nc1ccc(C2=NN(C(=O)c3ccc(F)cc3)C(c3ccco3)C2)cc1	CS(=O)(=O)Nc1ccc(C2=NN(C(=O)c3ccc(Cl)cc3)C(c3ccco3)C2)cc1	4.89757	5.56543	-0.667865	CHEMBL5149881	CHEMBL5149881	TRUE
NS(=O)(=O)c1cccc(-c2nnc(-c3ccc(F)cc3)o2)c1	NS(=O)(=O)c1cccc(-c2nnc(-c3ccc(Cl)cc3)o2)c1	6.011	6.67778	-0.666785	CHEMBL4308253	CHEMBL4308253	TRUE
O=C1C(=Cc2ccc(N3CCN(c4ccc(F)cc4)CC3)cc2)C(=O)c2ccccc21	O=C1C(=Cc2ccc(N3CCN(c4ccc(Cl)cc4)CC3)cc2)C(=O)c2ccccc21	5.28954	5.95507	-0.665524	CHEMBL3820887	CHEMBL3820887	TRUE
CCOC(=O)C1=C(CN2CCOCC2)NC(c2nccs2)=NC1c1ccccc1F	CCOC(=O)C1=C(CN2CCOCC2)NC(c2nccs2)=NC1c1ccccc1Cl	7.13077	7.79588	-0.665112	CHEMBL4177855	CHEMBL4177855	TRUE
Fc1cccc(OCC2CN(Cc3ccc(Cl)cc3)CCO2)n1	Clc1ccc(CN2CCOC(COc3cccc(Cl)n3)C2)cc1	6.33724	7	-0.662758	CHEMBL3796307	CHEMBL3796307	TRUE
COC(=O)C1=C(CN2CCOCC2C(=O)O)NC(c2nccs2)=NC1c1ccc(F)c(F)c1	COC(=O)C1=C(CN2CCOCC2C(=O)O)NC(c2nccs2)=NC1c1ccc(Cl)c(F)c1	7.33724	8	-0.662758	CHEMBL4416859	CHEMBL4416859	TRUE
Cc1c(-c2ccc(-c3cccnc3F)cc2)nc2ccc(Cl)cc2c1C(=O)O	Cc1c(-c2ccc(-c3cccnc3Cl)cc2)nc2ccc(Cl)cc2c1C(=O)O	6.78252	7.4437	-0.661181	CHEMBL4224224	CHEMBL4224224	TRUE
CCC(=O)NC(Cc1nc2ccc(F)cc2s1)C(=O)NC(C(=O)NC(CCCCN)C(=O)NC(c1ccccc1)c1ccccc1)C1CCCC1	CCC(=O)NC(Cc1nc2ccc(Cl)cc2s1)C(=O)NC(C(=O)NC(CCCCN)C(=O)NC(c1ccccc1)c1ccccc1)C1CCCC1	7.4318	8.09151	-0.659717	CHEMBL4121123	CHEMBL4121123	TRUE
COc1cc2c(cc1Nc1ncc(C(N)=O)c(Nc3ccccc3F)n1)CN(C)CC2	COc1cc2c(cc1Nc1ncc(C(N)=O)c(Nc3ccccc3Cl)n1)CN(C)CC2	9.22915	9.88606	-0.656909	CHEMBL4818576	CHEMBL4818576	TRUE
COc1cccc(S(=O)(=O)C=Cc2ncccc2F)c1	COc1cccc(S(=O)(=O)C=Cc2ncccc2Cl)c1	6.35262	7.00877	-0.656157	CHEMBL4331808	CHEMBL4331808	TRUE
O=C(NNS(=O)(=O)c1ccc2ccccc2c1)c1cccc(F)c1F	O=C(NNS(=O)(=O)c1ccc2ccccc2c1)c1cccc(Cl)c1F	5.56864	6.22185	-0.653213	CHEMBL4374938	CHEMBL4374938	TRUE
Fc1ccc(Nc2nc(-c3ccccc3)nc3sc4c(c23)CCCC4)cc1	Clc1ccc(Nc2nc(-c3ccccc3)nc3sc4c(c23)CCCC4)cc1	4.91435	5.56543	-0.651078	CHEMBL3855802	CHEMBL3855802	TRUE
CN(CC=Cc1ccc(F)cc1)Cc1ccc2c(c1)CCCCC2	CN(CC=Cc1ccc(Cl)cc1)Cc1ccc2c(c1)CCCCC2	7.4045	8.05552	-0.651014	CHEMBL3829384	CHEMBL3829384	TRUE
O=c1[nH]nc2ccc(Sc3ccc(F)cc3)nn12	O=c1[nH]nc2ccc(Sc3ccc(Cl)cc3)nn12	7.02687	7.67778	-0.650909	CHEMBL5041229	CHEMBL5041229	TRUE
O=c1[nH]cc(C2COc3cc(F)ccc3S2)[nH]c1=O	O=c1[nH]cc(C2COc3cc(Cl)ccc3S2)[nH]c1=O	7.02687	7.67778	-0.650909	CHEMBL5166382	CHEMBL5166382	TRUE
O=C(O)CCC(=O)NC(CC(=O)O)Cc1ccc(-c2cccc(F)c2)cc1	O=C(O)CCC(=O)NC(CC(=O)O)Cc1ccc(-c2cccc(Cl)c2)cc1	8.17393	8.82391	-0.649984	CHEMBL4339144	CHEMBL4339144	TRUE
COc1cc(-n2nnc(S(=O)(=O)c3ccc(C(C)(C)C)cc3)c2C)c(OC)cc1F	COc1cc(-n2nnc(S(=O)(=O)c3ccc(C(C)(C)C)cc3)c2C)c(OC)cc1Cl	5.39794	6.04576	-0.647817	CHEMBL4834539	CHEMBL4834539	TRUE
COc1ccc2[nH]c3c(c2c1)CCNC31CCN(Cc2cc(F)cc(F)c2)CC1	COc1ccc2[nH]c3c(c2c1)CCNC31CCN(Cc2cc(F)cc(Cl)c2)CC1	4.95468	5.60206	-0.647383	CHEMBL4733683	CHEMBL4733683	TRUE
O=C(Nc1ccc(F)cc1C(=O)O)c1ccc(SC(F)(F)F)cc1	O=C(Nc1ccc(Cl)cc1C(=O)O)c1ccc(SC(F)(F)F)cc1	4.52288	5.16749	-0.644612	CHEMBL4667323	CHEMBL4667323	TRUE
CC(NC(=O)c1ccncc1F)C(=O)N1CCCC1B(O)O	CC(NC(=O)c1ccncc1Cl)C(=O)N1CCCC1B(O)O	7.82391	8.46852	-0.644612	CHEMBL2346129	CHEMBL2346129	TRUE
O=S(=O)(C=Cc1ncccc1F)c1ccc(Cl)cc1	O=S(=O)(C=Cc1ncccc1Cl)c1ccc(Cl)cc1	6.54363	7.18709	-0.643453	CHEMBL4712767	CHEMBL4712767	TRUE
COc1ccc(NC(=O)c2ccc(N3CCCCC3=O)cc2)c(C(=O)Nc2ccc(F)cc2)c1	COc1ccc(NC(=O)c2ccc(N3CCCCC3=O)cc2)c(C(=O)Nc2ccc(Cl)cc2)c1	5.96698	6.60906	-0.642086	CHEMBL4383871	CHEMBL4383871	TRUE
O=C1Cn2c(cc3cc(F)ccc32)C(=O)N1O	O=C1Cn2c(cc3cc(Cl)ccc32)C(=O)N1O	3.30103	3.9431	-0.642065	CHEMBL3807263	CHEMBL3807263	TRUE
NC(=O)c1cccc(NC(=O)C=CC(=O)N2CCN(c3ccc(F)cc3)CC2)c1	NC(=O)c1cccc(NC(=O)C=CC(=O)N2CCN(c3ccc(Cl)cc3)CC2)c1	6.1549	6.79588	-0.640978	CHEMBL4122806	CHEMBL4122806	TRUE
O=c1cc(O)c2ccc(OCc3cccc(F)c3)cc2o1	O=c1cc(O)c2ccc(OCc3cccc(Cl)c3)cc2o1	5.68	6.32	-0.640001	CHEMBL3096735	CHEMBL3096735	TRUE
NC(=O)c1c(NC(=O)c2ccccc2F)sc2c1CCN(C(=S)Nc1ccccc1Cl)C2	NC(=O)c1c(NC(=O)c2ccccc2Cl)sc2c1CCN(C(=S)Nc1ccccc1Cl)C2	4.95585	5.59346	-0.637607	CHEMBL4344501	CHEMBL4344501	TRUE
Fc1ccc(OCc2nnc(SC3CCCC3)n2-c2cccnc2)cc1	Clc1ccc(OCc2nnc(SC3CCCC3)n2-c2cccnc2)cc1	6.21896	6.85387	-0.634909	CHEMBL2317274	CHEMBL2317274	TRUE
CC12CCOCC1C1(COC(N)=N1)c1cc(-c3cncc(F)c3)ccc1O2	CC12CCOCC1C1(COC(N)=N1)c1cc(-c3cncc(Cl)c3)ccc1O2	7.00436	7.63827	-0.633907	CHEMBL3131971	CHEMBL3131971	TRUE
NS(=O)(=O)c1cc(NC(=O)Cc2ccccc2F)ccc1OCC1CCOCC1	NS(=O)(=O)c1cc(NC(=O)Cc2ccccc2Cl)ccc1OCC1CCOCC1	6.22403	6.85699	-0.63296	CHEMBL4324752	CHEMBL4324752	TRUE
Fc1cccc(NCc2coc(/C=C/c3ccc(C(F)(F)F)cc3)n2)c1	FC(F)(F)c1ccc(/C=C/c2nc(CNc3cccc(Cl)c3)co2)cc1	5.06399	5.6968	-0.632815	CHEMBL5122916	CHEMBL5122916	TRUE
Cc1nn(-c2ccccn2)c2c1C(=O)CC(C)(C)C2F	Cc1nn(-c2ccccn2)c2c1C(=O)CC(C)(C)C2Cl	4.67778	5.3098	-0.632023	CHEMBL4737441	CHEMBL4737441	TRUE
Nc1cccc(Nc2ncc(NC(=O)c3cc(NC(=O)c4cccc(C(F)(F)F)c4)ccc3F)cn2)c1	Nc1cccc(Nc2ncc(NC(=O)c3cc(NC(=O)c4cccc(C(F)(F)F)c4)ccc3Cl)cn2)c1	7.3279	7.95861	-0.630705	CHEMBL3296229	CHEMBL3296229	TRUE
Nc1cc(F)ccc1NC(=O)c1ccc(CN2CCC/C(=C\c3ccc(F)cc3)C2=O)cc1	Nc1cc(F)ccc1NC(=O)c1ccc(CN2CCC/C(=C\c3ccc(Cl)cc3)C2=O)cc1	5.57971	6.20971	-0.630001	CHEMBL5156365	CHEMBL5156365	TRUE
COc1ccc(C=CC(=O)NO)cc1OCC(=O)Nc1ccc(F)c(Cl)c1	COc1ccc(C=CC(=O)NO)cc1OCC(=O)Nc1ccc(Cl)c(Cl)c1	5.23508	5.86328	-0.628202	CHEMBL3271696	CHEMBL3271696	TRUE
Cc1c(C(C#N)c2ccc(F)cc2)nc(SC(C)C)[nH]c1=O	Cc1c(C(C#N)c2ccc(Cl)cc2)nc(SC(C)C)[nH]c1=O	4.8457	5.47289	-0.627188	CHEMBL5140369	CHEMBL5140369	TRUE
CCCCCCCCS(=O)(=O)Nc1ccc(-c2cccc(F)c2)cc1C(=O)O	CCCCCCCCS(=O)(=O)Nc1ccc(-c2cccc(Cl)c2)cc1C(=O)O	4.42481	5.05061	-0.625798	CHEMBL3583672	CHEMBL3583672	TRUE
COc1ccccc1N1CCN(CCCCC(=O)NCc2ccccc2-c2ccccc2F)CC1	COc1ccccc1N1CCN(CCCCC(=O)NCc2ccccc2-c2ccccc2Cl)CC1	7.43771	8.06098	-0.623273	CHEMBL3365905	CHEMBL3365905	TRUE
COc1cc(-c2cc(C(=O)O)c3ccccc3n2)ccc1OCC(=O)Nc1cccc(F)c1	COc1cc(-c2cc(C(=O)O)c3ccccc3n2)ccc1OCC(=O)Nc1cccc(Cl)c1	5.67778	6.30103	-0.623249	CHEMBL4813390	CHEMBL4813390	TRUE
O=C(Nc1cccc(C2CCCN(c3ncnc4[nH]ccc34)C2)c1)Nc1ccccc1F	O=C(Nc1cccc(C2CCCN(c3ncnc4[nH]ccc34)C2)c1)Nc1ccccc1Cl	6.30103	6.92082	-0.619789	CHEMBL4389078	CHEMBL4389078	TRUE
COc1cc(C=CC(=O)NO)ccc1OCC(Cc1c[nH]c2ccccc12)NC(=O)c1cccc(F)c1	COc1cc(C=CC(=O)NO)ccc1OCC(Cc1c[nH]c2ccccc12)NC(=O)c1cccc(Cl)c1	7.22185	7.84164	-0.619789	CHEMBL4017597	CHEMBL4017597	TRUE
O=C1CC(c2ccccc2)CC(O)=C1Sc1ccc(F)cc1F	O=C1CC(c2ccccc2)CC(O)=C1Sc1ccc(F)cc1Cl	4	4.61979	-0.619789	CHEMBL3369984	CHEMBL3369984	TRUE
CNC(=O)CC(NC(=O)C1CC(O)CN1C(=O)C(c1cc(C)no1)C(C)C)c1ccc(F)cc1	CNC(=O)CC(NC(=O)C1CC(O)CN1C(=O)C(c1cc(C)no1)C(C)C)c1ccc(Cl)cc1	4.97881	5.5986	-0.619789	CHEMBL4325017	CHEMBL4325017	TRUE
Cc1ccccc1Oc1ccc(F)c(-n2c(=O)cc(C(F)(F)F)[nH]c2=O)c1	Cc1ccccc1Oc1ccc(Cl)c(-n2c(=O)cc(C(F)(F)F)[nH]c2=O)c1	4.30103	4.92082	-0.619789	CHEMBL5217582	CHEMBL5217582	TRUE
O=C1NC(=O)C(CCC(=O)N2CCN(c3ccc(F)cc3)CC2)N1	O=C1NC(=O)C(CCC(=O)N2CCN(c3ccc(Cl)cc3)CC2)N1	5.65111	6.27084	-0.619724	CHEMBL4835172	CHEMBL4835172	TRUE
N=C(N)Nc1ccc(F)cn1	N=C(N)Nc1ccc(Cl)cn1	3.84164	4.45967	-0.618033	CHEMBL4727019	CHEMBL4727019	TRUE
COc1cc2c(c(OC)c1OC)C(c1cc(F)ccc1F)NC(=O)N2	COc1cc2c(c(OC)c1OC)C(c1cc(Cl)ccc1F)NC(=O)N2	4.76955	5.38722	-0.617665	CHEMBL4186172	CHEMBL4186172	TRUE
Cn1c(COc2cccc(C(=O)O)c2)nc2ccc(Oc3cc(F)cc(F)c3)cc21	Cn1c(COc2cccc(C(=O)O)c2)nc2ccc(Oc3cc(F)cc(Cl)c3)cc21	7.02228	7.63827	-0.615996	CHEMBL4158091	CHEMBL4158091	TRUE
Cn1c(N2CCNC(c3cccc(F)c3)C2)nc(-c2ccncc2)cc1=O	Cn1c(N2CCNC(c3cccc(Cl)c3)C2)nc(-c2ccncc2)cc1=O	7.65758	8.26761	-0.610029	CHEMBL4057861	CHEMBL4057861	TRUE
CNS(=O)(=O)c1cccc(Nc2ncnc3[nH]cc(F)c23)c1	CNS(=O)(=O)c1cccc(Nc2ncnc3[nH]cc(Cl)c23)c1	6.88606	7.49485	-0.608793	CHEMBL3816884	CHEMBL3816884	TRUE
CC(O)C(N)C(=O)NCC=CCn1cnc2cc(F)c(F)cc2c1=O	CC(O)C(N)C(=O)NCC=CCn1cnc2cc(Cl)c(F)cc2c1=O	4.4045	5.01323	-0.608724	CHEMBL4403853	CHEMBL4403853	TRUE
N#Cc1c(N)ncnc1N1CC2(CC2)CC1c1nc2cccc(F)c2c(=O)n1-c1ccccc1	N#Cc1c(N)ncnc1N1CC2(CC2)CC1c1nc2cccc(Cl)c2c(=O)n1-c1ccccc1	7.82391	8.4318	-0.60789	CHEMBL4685225	CHEMBL4685225	TRUE
CCn1c(Sc2cccc(F)c2)cc(=O)n(O)c1=O	CCn1c(Sc2cccc(Cl)c2)cc(=O)n(O)c1=O	4.63827	5.24413	-0.605853	CHEMBL4824591	CHEMBL4824591	TRUE
O=c1cc(OCC(O)CN2CCN(c3ccccc3F)CC2)c2ccccc2o1	O=c1cc(OCC(O)CN2CCN(c3ccccc3Cl)CC2)c2ccccc2o1	4.14819	4.75301	-0.604818	CHEMBL3387730	CHEMBL3387730	TRUE
CC(C)n1nc(-c2ccc3oc(N)nc3c2)c2c(F)nc(N)nc21	CC(C)n1nc(-c2ccc3oc(N)nc3c2)c2c(Cl)nc(N)nc21	7.09691	7.69897	-0.60206	CHEMBL4410951	CHEMBL4410951	TRUE
O=C(Nc1ccc(F)cc1C(=O)O)c1ccc(-c2ccccc2)cc1	O=C(Nc1ccc(Cl)cc1C(=O)O)c1ccc(-c2ccccc2)cc1	4.81816	5.42022	-0.60206	CHEMBL3129686	CHEMBL3129686	TRUE
CC1OC2(CCN(CCc3ccccc3)CC2)CN(c2ccccc2F)C1=O	CC1OC2(CCN(CCc3ccccc3)CC2)CN(c2ccccc2Cl)C1=O	8.39794	9	-0.60206	CHEMBL4356649	CHEMBL4356649	TRUE
CN(C)CCNC(=O)c1ccccc1Sc1ccccc1F	CN(C)CCNC(=O)c1ccccc1Sc1ccccc1Cl	3.69897	4.30103	-0.60206	CHEMBL4026494	CHEMBL4026494	TRUE
NOCc1cccc(F)c1	NOCc1cccc(Cl)c1	5.09691	5.69897	-0.60206	CHEMBL5149482	CHEMBL5149482	TRUE
Oc1ccc(C(c2ccc(F)cc2)c2ccccn2)cc1	Oc1ccc(C(c2ccc(Cl)cc2)c2ccccn2)cc1	3.39794	4	-0.60206	CHEMBL4711205	CHEMBL4711205	TRUE
Cn1ccc2cc(CNC(=O)N3CC(COc4ccc(F)cc4)C3)ccc21	Cn1ccc2cc(CNC(=O)N3CC(COc4ccc(Cl)cc4)C3)ccc21	6.65758	7.25964	-0.60206	CHEMBL4826685	CHEMBL4826685	TRUE
COc1ccc2[nH]cc(C3CCCN(CCCCn4c(=O)c(-c5ccccc5F)c5n(c4=O)CCCC5)C3)c2c1	COc1ccc2[nH]cc(C3CCCN(CCCCn4c(=O)c(-c5ccccc5Cl)c5n(c4=O)CCCC5)C3)c2c1	6.21681	6.81816	-0.601345	CHEMBL4367996	CHEMBL4367996	TRUE
CS(=O)(=O)c1ccc(C(=Cc2ccc(F)cc2)C(=O)O)cc1	CS(=O)(=O)c1ccc(C(=Cc2ccc(Cl)cc2)C(=O)O)cc1	4.36552	4.96658	-0.601054	CHEMBL2345591	CHEMBL2345591	TRUE
CNC(=O)Nc1ccc(OC)cc1OCC(O)CN1CCC2(CC1)Cc1cc(F)ccc1O2	CNC(=O)Nc1ccc(OC)cc1OCC(O)CN1CCC2(CC1)Cc1cc(Cl)ccc1O2	5.74958	6.34969	-0.600112	CHEMBL3102089	CHEMBL3102089	TRUE
Cc1nn(C)c(C)c1-c1ccc(-c2nnc(N(C)Cc3ccc4nccn4c3)o2)c(F)c1	Cc1nn(C)c(C)c1-c1ccc(-c2nnc(N(C)Cc3ccc4nccn4c3)o2)c(Cl)c1	5.5	6.1	-0.599999	CHEMBL4828161	CHEMBL4828161	TRUE
O=C(c1cc(-c2ccc(=O)[nH]c2)on1)N1CCC(Cc2ccc(F)cc2)CC1	O=C(c1cc(-c2ccc(=O)[nH]c2)on1)N1CCC(Cc2ccc(Cl)cc2)CC1	7.40001	8	-0.599992	CHEMBL4321003	CHEMBL4321003	TRUE
Cc1nc(C)c(-c2ccc(-c3ccc(CC(=O)O)cc3F)cc2)nc1C(N)=O	Cc1nc(C)c(-c2ccc(-c3ccc(CC(=O)O)cc3Cl)cc2)nc1C(N)=O	7.59998	8.19997	-0.59999	CHEMBL3136463	CHEMBL3136463	TRUE
Fc1cc2sncc2cc1NCc1ncc(Cl)s1	Clc1cnc(CNc2cc3cnsc3cc2Cl)s1	7.01002	7.60995	-0.599932	CHEMBL4824105	CHEMBL4824105	TRUE
O=C1COc2cc3ncnc(Nc4cccc(F)c4)c3cc2N1CCCN1CCCCC1	O=C1COc2cc3ncnc(Nc4cccc(Cl)c4)c3cc2N1CCCN1CCCCC1	6.33724	6.93592	-0.598674	CHEMBL3776094	CHEMBL3776094	TRUE
OCc1cn(-c2cccc(F)c2)nn1	OCc1cn(-c2cccc(Cl)c2)nn1	4.60206	5.20066	-0.598599	CHEMBL5166901	CHEMBL5166901	TRUE
CC(=O)N1CCN(c2ccc3c(c2)CCN(S(=O)(=O)N(C)Cc2cccc(F)c2)C3)CC1	CC(=O)N1CCN(c2ccc3c(c2)CCN(S(=O)(=O)N(C)Cc2cccc(Cl)c2)C3)CC1	6.26281	6.86012	-0.597314	CHEMBL4827012	CHEMBL4827012	TRUE
O=C(O)CSC(=O)C(Cc1c[nH]c2ccccc12)NC(=O)c1ccc(F)cc1	O=C(O)CSC(=O)C(Cc1c[nH]c2ccccc12)NC(=O)c1ccc(Cl)cc1	6.12494	6.72125	-0.596308	CHEMBL4259222	CHEMBL4259222	TRUE
Cc1ccc2nc(C3=C(N)N(c4cccc(F)c4)CC3=O)[nH]c2c1	Cc1ccc2nc(C3=C(N)N(c4cccc(Cl)c4)CC3=O)[nH]c2c1	5.13668	5.73283	-0.596151	CHEMBL3782932	CHEMBL3782932	TRUE
CN(C)CCCNc1nc(C=Cc2ccc(F)cc2)nc2ccc(F)cc12	CN(C)CCCNc1nc(C=Cc2ccc(F)cc2)nc2ccc(Cl)cc12	5.44491	6.04096	-0.596053	CHEMBL4315097	CHEMBL4315097	TRUE
CC1(CC(=O)O)CCc2cc(-c3ccc(NC(=O)Nc4cccc(F)c4)cc3)ccc2C1=O	CC1(CC(=O)O)CCc2cc(-c3ccc(NC(=O)Nc4cccc(Cl)c4)cc3)ccc2C1=O	7.20066	7.79588	-0.595221	CHEMBL4144917	CHEMBL4144917	TRUE
Cc1cc(S(=O)(=O)C2CC2)cc(=O)n1C(CC1CCCC1)C(=O)Nc1ncc(F)s1	Cc1cc(S(=O)(=O)C2CC2)cc(=O)n1C(CC1CCCC1)C(=O)Nc1ncc(Cl)s1	6.20066	6.79588	-0.595221	CHEMBL2353001	CHEMBL2353001	TRUE
O=C(Nc1nnc(-c2ccc3c(c2)CCCC3)o1)c1ccc(F)cc1	O=C(Nc1nnc(-c2ccc3c(c2)CCCC3)o1)c1ccc(Cl)cc1	5.22915	5.82391	-0.594761	CHEMBL4384517	CHEMBL4384517	TRUE
CC1CN(CC(=O)N2CCc3ccc(F)cc32)CCN1	CC1CN(CC(=O)N2CCc3ccc(Cl)cc32)CCN1	4.29243	4.88606	-0.593627	CHEMBL3602876	CHEMBL3602876	TRUE
CC1CN(CC(=O)N2CCc3ccc(F)cc32)CCN1	CC1CN(CC(=O)N2CCc3ccc(Cl)cc32)CCN1	7.29243	7.88606	-0.593627	CHEMBL5139181	CHEMBL5139181	TRUE
Nc1n[nH]c2c1c(Nc1ccc(F)cc1)nc1ccccc12	Nc1n[nH]c2c1c(Nc1ccc(Cl)cc1)nc1ccccc12	6.86487	7.45842	-0.593553	CHEMBL4026922	CHEMBL4026922	TRUE
CCNC(=O)C1OC(n2cnc3c(N)nc(NCCN4CCN(c5ccc(F)cc5)CC4)nc32)C(O)C1O	CCNC(=O)C1OC(n2cnc3c(N)nc(NCCN4CCN(c5ccc(Cl)cc5)CC4)nc32)C(O)C1O	7.00877	7.60206	-0.593286	CHEMBL3419484	CHEMBL3419484	TRUE
CC1(C)Oc2cc(C#Cc3cc(Cl)ccc3F)ccc2-c2[nH]c(-c3c(F)cccc3Cl)nc21	CC1(C)Oc2cc(C#Cc3cc(Cl)ccc3Cl)ccc2-c2[nH]c(-c3c(F)cccc3Cl)nc21	7.44033	8.03152	-0.591184	CHEMBL4029858	CHEMBL4029858	TRUE
O=C1CCc2cc(C(c3ccncc3)c3cccc(F)c3)cc3c2N1CC3	O=C1CCc2cc(C(c3ccncc3)c3cccc(Cl)c3)cc3c2N1CC3	7.13077	7.72125	-0.590478	CHEMBL2321525	CHEMBL2321525	TRUE
COc1cc(C=CC(=O)NCC(=O)Nc2cccc(F)c2)ccc1O	COc1cc(C=CC(=O)NCC(=O)Nc2cccc(Cl)c2)ccc1O	4.65521	5.24565	-0.590437	CHEMBL4769502	CHEMBL4769502	TRUE
O=C1COc2cc3ncnc(Nc4cccc(F)c4)c3cc2N1CCCN1CCOCC1	O=C1COc2cc3ncnc(Nc4cccc(Cl)c4)c3cc2N1CCCN1CCOCC1	6.61066	7.19997	-0.589314	CHEMBL3776094	CHEMBL3776094	TRUE
COC(=O)CCC1NC(=O)c2cc(Oc3cccc(N(C)C)c3)c(NC(=O)COCc3ccc(F)cc3)cc2NC1=O	COC(=O)CCC1NC(=O)c2cc(Oc3cccc(N(C)C)c3)c(NC(=O)COCc3ccc(Cl)cc3)cc2NC1=O	5.62709	6.21467	-0.587582	CHEMBL4016493	CHEMBL4016493	TRUE
COc1cc(C(=O)NC2CC3CCCC(C2)N3CC(=O)Nc2ccc(F)cc2)cc(OC)c1OC	COc1cc(C(=O)NC2CC3CCCC(C2)N3CC(=O)Nc2ccc(Cl)cc2)cc(OC)c1OC	5.23657	5.82391	-0.587337	CHEMBL4611266	CHEMBL4611266	TRUE
CN1C(=O)CCC1CN(Cc1ccc(F)cc1)S(=O)(=O)c1cccc(C#N)c1	CN1C(=O)CCC1CN(Cc1ccc(Cl)cc1)S(=O)(=O)c1cccc(C#N)c1	6.09151	6.67778	-0.586266	CHEMBL3129655	CHEMBL3129655	TRUE
O=C(Nc1cc2cc[nH]c2cn1)c1ccc(F)c(F)c1	O=C(Nc1cc2cc[nH]c2cn1)c1ccc(F)c(Cl)c1	6.55752	7.14267	-0.585147	CHEMBL4385037	CHEMBL4385037	TRUE
NS(=O)(=O)c1ccc(NC(=O)NCCN2CCN(c3ccc(F)cc3)CC2)cc1	NS(=O)(=O)c1ccc(NC(=O)NCCN2CCN(c3ccc(Cl)cc3)CC2)cc1	5.45717	6.04144	-0.584262	CHEMBL4010241	CHEMBL4010241	TRUE
O=C(O)c1cc2c(s1)-c1ccc(F)c(Cl)c1CC2	O=C(O)c1cc2c(s1)-c1ccc(Cl)c(Cl)c1CC2	7.33724	7.92082	-0.583577	CHEMBL3762926	CHEMBL3762926	TRUE
Fc1cccc(Nc2ncnc3cc(OCCCN4CCOCC4)c4c(c23)OCCO4)c1	Clc1cccc(Nc2ncnc3cc(OCCCN4CCOCC4)c4c(c23)OCCO4)c1	7.07634	7.65857	-0.582224	CHEMBL3807186	CHEMBL3807186	TRUE
O=S(=O)(NC1CC1)c1ccc(-c2ccsc2)c(Nc2nc3ccc(F)c(Cl)c3[nH]2)c1	O=S(=O)(NC1CC1)c1ccc(-c2ccsc2)c(Nc2nc3ccc(Cl)c(Cl)c3[nH]2)c1	4.98506	5.56543	-0.580371	CHEMBL4628662	CHEMBL4628662	TRUE
CCS(=O)(=O)c1ccc(CC(=O)Nc2ccc(C(C)(C)C(=O)Nc3cc(F)ccn3)cc2)cc1	CCS(=O)(=O)c1ccc(CC(=O)Nc2ccc(C(C)(C)C(=O)Nc3cc(Cl)ccn3)cc2)cc1	7.50864	8.08619	-0.577548	CHEMBL4264789	CHEMBL4264789	TRUE
CCN(Cc1ccccc1)C(=O)c1nc(-c2ccccc2F)c2ccccc2n1	CCN(Cc1ccccc1)C(=O)c1nc(-c2ccccc2Cl)c2ccccc2n1	9.05159	9.62893	-0.577345	CHEMBL3269398	CHEMBL3269398	TRUE
O=[N+]([O-])c1ccc(NCCNc2ncc(-n3ccnc3)c(-c3ccc(F)cc3)n2)nc1	O=[N+]([O-])c1ccc(NCCNc2ncc(-n3ccnc3)c(-c3ccc(Cl)cc3)n2)nc1	6.69897	7.27572	-0.576754	CHEMBL4022683	CHEMBL4022683	TRUE
COc1cc(C=CC(=O)NCC(=O)Nc2ccc(F)cc2)ccc1O	COc1cc(C=CC(=O)NCC(=O)Nc2ccc(Cl)cc2)ccc1O	4.8884	5.46471	-0.576304	CHEMBL4769502	CHEMBL4769502	TRUE
Fc1cccc(C[n+]2ccc(Cn3c4c(c5ccccc53)CCCC4)cc2)c1	Clc1cccc(C[n+]2ccc(Cn3c4c(c5ccccc53)CCCC4)cc2)c1	6.00877	6.58503	-0.576253	CHEMBL4155445	CHEMBL4155445	TRUE
O=C(CF)CNC(=O)C(Cc1cccc(F)c1)NC(=O)OCc1ccccc1	O=C(CF)CNC(=O)C(Cc1cccc(Cl)c1)NC(=O)OCc1ccccc1	5.3851	5.95861	-0.573505	CHEMBL4480313	CHEMBL4480313	TRUE
CCn1cc(C(=NNc2nc(-c3ccc(F)cc3)c(C#N)s2)C(F)(F)F)c2cc(-c3nc(CN4CCCC4CO)cs3)ccc21	CCn1cc(C(=NNc2nc(-c3ccc(Cl)cc3)c(C#N)s2)C(F)(F)F)c2cc(-c3nc(CN4CCCC4CO)cs3)ccc21	5.27819	5.85078	-0.572592	CHEMBL4771183	CHEMBL4771183	TRUE
CN(C)CCNc1cc(C=Cc2cccs2)nc2ccc(F)cc12	CN(C)CCNc1cc(C=Cc2cccs2)nc2ccc(Cl)cc12	6.95507	7.52724	-0.572175	CHEMBL4671338	CHEMBL4671338	TRUE
NC1CC1(F)c1ccc(F)cc1	NC1CC1(F)c1ccc(Cl)cc1	4.60206	5.17393	-0.571865	CHEMBL4039114	CHEMBL4039114	TRUE
COc1ccc2nc(C)cc(N3CCC(NC(=S)Nc4ccc(F)cc4)CC3)c2c1	COc1ccc2nc(C)cc(N3CCC(NC(=S)Nc4ccc(Cl)cc4)CC3)c2c1	5.63639	6.20761	-0.57122	CHEMBL3405737	CHEMBL3405737	TRUE
COc1ccc2nc(C)cc(N3CCC(NC(=S)Nc4ccc(F)cc4)CC3)c2c1	COc1ccc2nc(C)cc(N3CCC(NC(=S)Nc4ccc(Cl)cc4)CC3)c2c1	5.63639	6.20761	-0.57122	CHEMBL3405737	CHEMBL3405737	TRUE
COCCCNc1cc(-c2cnc(C)nc2-c2ccc(F)cc2Cl)nc(-c2cccnc2)n1	COCCCNc1cc(-c2cnc(C)nc2-c2ccc(Cl)cc2Cl)nc(-c2cccnc2)n1	5.87615	6.44733	-0.571183	CHEMBL3399440	CHEMBL3399440	TRUE
CCOc1ccc(-c2cncnc2-c2cc(OC)c(OC)c(OC)c2)cc1F	CCOc1ccc(-c2cncnc2-c2cc(OC)c(OC)c(OC)c2)cc1Cl	4.767	5.33724	-0.570238	CHEMBL5162756	CHEMBL5162756	TRUE
O=C(CCCN1CCC(O)(c2ccc(F)cc2)CC1)c1ccc(Cl)cc1	O=C(CCCN1CCC(O)(c2ccc(Cl)cc2)CC1)c1ccc(Cl)cc1	7.73002	8.29999	-0.569969	CHEMBL4416273	CHEMBL4416273	TRUE
CC(COc1ccccc1)Oc1ccn(-c2ccc(F)cc2)c(=O)c1	CC(COc1ccccc1)Oc1ccn(-c2ccc(Cl)cc2)c(=O)c1	5	5.56864	-0.568636	CHEMBL4350329	CHEMBL4350329	TRUE
CCC(=Cc1ccc(OCCN(C)C)cc1)c1ccc(F)cc1	CCC(=Cc1ccc(OCCN(C)C)cc1)c1ccc(Cl)cc1	4.69897	5.26761	-0.568636	CHEMBL4603647	CHEMBL4603647	TRUE
CCOC(=O)c1cc(-c2ccc(F)cc2)n(-c2ccc(S(N)(=O)=O)cc2)n1	CCOC(=O)c1cc(-c2ccc(Cl)cc2)n(-c2ccc(S(N)(=O)=O)cc2)n1	5.13077	5.69897	-0.568202	CHEMBL4737248	CHEMBL4737248	TRUE
CC(=NNC(=O)C1=C(O)c2ccccc2S(=O)(=O)N1)c1ccc(F)cc1	CC(=NNC(=O)C1=C(O)c2ccccc2S(=O)(=O)N1)c1ccc(Cl)cc1	4.39469	4.96257	-0.567879	CHEMBL4141646	CHEMBL4141646	TRUE
O=C(NCc1ncc(-c2ccc(F)cc2)[nH]1)C1=Cc2ccccc2OC1	O=C(NCc1ncc(-c2ccc(Cl)cc2)[nH]1)C1=Cc2ccccc2OC1	6.37675	6.9431	-0.566344	CHEMBL3875688	CHEMBL3875688	TRUE
Cc1c(NC(=O)c2ccc(F)c(C#N)c2)cnc2c1c(C1CCN(C(=O)C(C)C)CC1)cn2C	Cc1c(NC(=O)c2ccc(Cl)c(C#N)c2)cnc2c1c(C1CCN(C(=O)C(C)C)CC1)cn2C	7.55284	8.11919	-0.566344	CHEMBL4266702	CHEMBL4266702	TRUE
CN1CCN(C(=O)COc2ccc(S(=O)(=O)C=Cc3ncccc3F)cc2)CC1	CN1CCN(C(=O)COc2ccc(S(=O)(=O)C=Cc3ncccc3Cl)cc2)CC1	5.91937	6.48545	-0.566079	CHEMBL4331808	CHEMBL4331808	TRUE
O=S(=O)(c1ccc(F)c(F)c1)c1cnc2cc(F)ccc2c1-c1ccc(F)cc1	O=S(=O)(c1ccc(F)c(Cl)c1)c1cnc2cc(F)ccc2c1-c1ccc(F)cc1	7.71897	8.284	-0.56503	CHEMBL4008945	CHEMBL4008945	TRUE
Cc1nc2cnc3ccc(-c4cc(F)c(O)c(F)c4)cc3c2n1C1CCN(C)CC1	Cc1nc2cnc3ccc(-c4cc(F)c(O)c(Cl)c4)cc3c2n1C1CCN(C)CC1	6.30103	6.8655	-0.564474	CHEMBL5119345	CHEMBL5119345	TRUE
O=C(c1ccc2c(c1)OCO2)c1c[nH]c2cc(F)ccc12	O=C(c1ccc2c(c1)OCO2)c1c[nH]c2cc(Cl)ccc12	5.35655	5.92082	-0.564271	CHEMBL4611608	CHEMBL4611608	TRUE
O=C(NNS(=O)(=O)c1ccc2ccccc2c1)c1cccc(F)c1	O=C(NNS(=O)(=O)c1ccc2ccccc2c1)c1cccc(Cl)c1	4.48149	5.04576	-0.564271	CHEMBL4374938	CHEMBL4374938	TRUE
N#CC1=C(N)Oc2c(c(=O)oc3ccccc23)C1c1ccc[n+](Cc2ccccc2F)c1	N#CC1=C(N)Oc2c(c(=O)oc3ccccc23)C1c1ccc[n+](Cc2ccccc2Cl)c1	4.38722	4.95078	-0.563566	CHEMBL2428568	CHEMBL2428568	TRUE
COc1ccccc1CC(=O)Nc1nc2ccc(F)cc2s1	COc1ccccc1CC(=O)Nc1nc2ccc(Cl)cc2s1	5.93181	6.49485	-0.563036	CHEMBL3239314	CHEMBL3239314	TRUE
NC(=O)c1cc(-c2ccccc2)sc1NC(=O)Nc1ccc(F)cc1	NC(=O)c1cc(-c2ccccc2)sc1NC(=O)Nc1ccc(Cl)cc1	4.94119	5.50279	-0.561599	CHEMBL3405427	CHEMBL3405427	TRUE
NC(=O)c1cc(-c2ccccc2)sc1NC(=O)Nc1ccc(F)cc1	NC(=O)c1cc(-c2ccccc2)sc1NC(=O)Nc1ccc(Cl)cc1	4.94119	5.50279	-0.561599	CHEMBL3405427	CHEMBL3405427	TRUE
CCCS(=O)(=O)Nc1ccc(F)c(NC(=O)c2csc3c(N)ncnc23)c1F	CCCS(=O)(=O)Nc1ccc(Cl)c(NC(=O)c2csc3c(N)ncnc23)c1F	8.48999	9.04998	-0.559985	CHEMBL4262904	CHEMBL4262904	TRUE
Cc1c2c(nn1CC(=O)NCc1ccccc1F)-c1ccccc1S(=O)(=O)N2C	Cc1c2c(nn1CC(=O)NCc1ccccc1Cl)-c1ccccc1S(=O)(=O)N2C	4.24033	4.7986	-0.558271	CHEMBL3405885	CHEMBL3405885	TRUE
O=C1C(=Cc2ccc(F)cc2)Cc2cc(O)ccc21	O=C1C(=Cc2ccc(Cl)cc2)Cc2cc(O)ccc21	7.3279	7.88606	-0.558155	CHEMBL3858835	CHEMBL3858835	TRUE
O=C(CC(c1ccc(F)cc1)C(C(=O)Nc1ccccn1)C(=O)Nc1ccccn1)c1ccccc1	O=C(CC(c1ccc(Cl)cc1)C(C(=O)Nc1ccccn1)C(=O)Nc1ccccn1)c1ccccc1	4.28735	4.84466	-0.557314	CHEMBL3773701	CHEMBL3773701	TRUE
NC(=NC(=NS(=O)(=O)N1CCC(C(F)(F)F)CC1)N1CC(c2ccccc2)C(c2ccc(Cl)cc2)=N1)c1ccc(F)cc1	NC(=NC(=NS(=O)(=O)N1CCC(C(F)(F)F)CC1)N1CC(c2ccccc2)C(c2ccc(Cl)cc2)=N1)c1ccc(Cl)cc1	7.70333	8.25964	-0.556303	CHEMBL5048445	CHEMBL5048445	TRUE
O=C(CSc1nnc(-c2ccccc2)c(-c2ccccc2)n1)Nc1ccc(F)cc1	O=C(CSc1nnc(-c2ccccc2)c(-c2ccccc2)n1)Nc1ccc(Cl)cc1	4.29559	4.85109	-0.555497	CHEMBL3997405	CHEMBL3997405	TRUE
CN1CCN(Cc2cn(S(=O)(=O)c3cccc(F)c3)c3ccccc23)CC1	CN1CCN(Cc2cn(S(=O)(=O)c3cccc(Cl)c3)c3ccccc23)CC1	7.23657	7.78781	-0.55124	CHEMBL4009037	CHEMBL4009037	TRUE
O=S(=O)(C=Cc1ncccc1Cl)c1ccc(F)cc1	O=S(=O)(C=Cc1ncccc1Cl)c1ccc(Cl)cc1	6.63639	7.18709	-0.550699	CHEMBL4712767	CHEMBL4712767	TRUE
Cc1cc(C)nc(NC(=S)N2CCN(Cc3cccc(F)c3)CC2)c1	Cc1cc(C)nc(NC(=S)N2CCN(Cc3cccc(Cl)c3)CC2)c1	4.40894	4.95861	-0.549672	CHEMBL4121210	CHEMBL4121210	TRUE
O=C1NC(=Nc2nnc(-c3ccc(F)cc3)s2)SC1=Cc1c(Cl)cccc1Cl	O=C1NC(=Nc2nnc(-c3ccc(Cl)cc3)s2)SC1=Cc1c(Cl)cccc1Cl	4.70333	5.25181	-0.548477	CHEMBL2438384	CHEMBL2438384	TRUE
NS(=O)(=O)c1ccc(-n2c(S)nc3c(F)cccc3c2=O)cc1	NS(=O)(=O)c1ccc(-n2c(S)nc3c(Cl)cccc3c2=O)cc1	6.54516	7.09151	-0.54636	CHEMBL3767104	CHEMBL3767104	TRUE
O=C(O)CCc1ccc(OCc2coc(-c3cccc(F)c3)n2)cc1	O=C(O)CCc1ccc(OCc2coc(-c3cccc(Cl)c3)n2)cc1	6.25181	6.79588	-0.544068	CHEMBL3602370	CHEMBL3602370	TRUE
O=C(CC1CCCCN1)Cn1cnc2cc(F)c(F)cc2c1=O	O=C(CC1CCCCN1)Cn1cnc2cc(Cl)c(F)cc2c1=O	6.20066	6.74473	-0.544068	CHEMBL5153089	CHEMBL5153089	TRUE
O=C(O)c1ccc(S(=O)(=O)N(Cc2ccccc2)c2ncc(C(F)(F)F)cc2F)cc1	O=C(O)c1ccc(S(=O)(=O)N(Cc2ccccc2)c2ncc(C(F)(F)F)cc2Cl)cc1	6.67162	7.21467	-0.54305	CHEMBL3383300	CHEMBL3383300	TRUE
CC(COc1ccccc1)COc1ccn(-c2ccc(F)cc2)c(=O)c1	CC(COc1ccccc1)COc1ccn(-c2ccc(Cl)cc2)c(=O)c1	5.49485	6.03621	-0.541362	CHEMBL4350329	CHEMBL4350329	TRUE
O=C(c1ccc(Nc2ncc(F)c(-c3cc4ccccc4s3)n2)cc1)N1CCC(N2CCCC2)CC1	O=C(c1ccc(Nc2ncc(Cl)c(-c3cc4ccccc4s3)n2)cc1)N1CCC(N2CCCC2)CC1	7.18046	7.72125	-0.54079	CHEMBL5107043	CHEMBL5107043	TRUE
Nc1ccccc1NC(=O)c1ccc(NC(=O)CN2C(=O)C3(OCCCO3)c3cc(F)ccc32)cc1	Nc1ccccc1NC(=O)c1ccc(NC(=O)CN2C(=O)C3(OCCCO3)c3cc(Cl)ccc32)cc1	5.42597	5.96658	-0.540608	CHEMBL4035693	CHEMBL4035693	TRUE
Cc1c(N2CCN(Cc3ccc(F)cc3)CC2)c(=O)n(CC(N)c2ccccc2)c(=O)n1Cc1c(F)cccc1F	Cc1c(N2CCN(Cc3ccc(Cl)cc3)CC2)c(=O)n(CC(N)c2ccccc2)c(=O)n1Cc1c(F)cccc1F	7.31336	7.85387	-0.540508	CHEMBL4430591	CHEMBL4430591	TRUE
Cc1cc(Nc2cc(N3CCN(C)CC3)nc(Nc3ccc(F)c(F)c3)n2)n[nH]1	Cc1cc(Nc2cc(N3CCN(C)CC3)nc(Nc3ccc(F)c(Cl)c3)n2)n[nH]1	7.04964	7.59007	-0.540432	CHEMBL4147248	CHEMBL4147248	TRUE
O=C(Cc1cc(Br)cc(Br)c1OC(=O)c1ccccc1F)Nc1ccccc1[N+](=O)[O-	O=C(Cc1cc(Br)cc(Br)c1OC(=O)c1ccccc1Cl)Nc1ccccc1[N+](=O)[O-	5.88941	6.42946	-0.540047	CHEMBL3869510	CHEMBL3869510	TRUE
CCC1OC(=O)C(C)C(OC2CC(C)(OC)C(O)C(C)O2)C(C)C(OC2OC(C)CC(N(C)C)C2O)C(C)(O)CC(C)CN(Cc2ccc(-c3cn(CCc4c[nH]c5ccc(F)cc45)nn3)cc2)C(C)C(O)C1(C)O	CCC1OC(=O)C(C)C(OC2CC(C)(OC)C(O)C(C)O2)C(C)C(OC2OC(C)CC(N(C)C)C2O)C(C)(O)CC(C)CN(Cc2ccc(-c3cn(CCc4c[nH]c5ccc(Cl)cc45)nn3)cc2)C(C)C(O)C1(C)O	5.6925	6.2321	-0.539598	CHEMBL3602325	CHEMBL3602325	TRUE
CCC1OC(=O)C(C)C(OC2CC(C)(OC)C(O)C(C)O2)C(C)C(OC2OC(C)CC(N(C)C)C2O)C(C)(O)CC(C)CN(Cc2ccc(-c3cn(CCc4c[nH]c5ccc(F)cc45)nn3)cc2)C(C)C(O)C1(C)O	CCC1OC(=O)C(C)C(OC2CC(C)(OC)C(O)C(C)O2)C(C)C(OC2OC(C)CC(N(C)C)C2O)C(C)(O)CC(C)CN(Cc2ccc(-c3cn(CCc4c[nH]c5ccc(Cl)cc45)nn3)cc2)C(C)C(O)C1(C)O	5.6925	6.2321	-0.539598	CHEMBL3602325	CHEMBL3602325	TRUE
Fc1ccc(NCn2nc(-c3ccc4ccccc4n3)oc2=S)cc1	S=c1oc(-c2ccc3ccccc3n2)nn1CNc1ccc(Cl)cc1	5.50864	6.04576	-0.537119	CHEMBL2319538	CHEMBL2319538	TRUE
Fc1ccc(N=Cc2ccc3[nH]ncc3c2)cc1Cl	Clc1ccc(N=Cc2ccc3[nH]ncc3c2)cc1Cl	9.03152	9.56864	-0.537119	CHEMBL4354288	CHEMBL4354288	TRUE
O=C1N/C(=N\c2nnc(-c3ccccc3F)s2)S/C1=C\c1cccc(F)c1	O=C1N/C(=N\c2nnc(-c3ccccc3Cl)s2)S/C1=C\c1cccc(F)c1	5.14267	5.67778	-0.535113	CHEMBL5109292	CHEMBL5109292	TRUE
O=C(O)c1cccc(N2CCN(C(=O)COc3cccc(F)c3)CC2)c1	O=C(O)c1cccc(N2CCN(C(=O)COc3cccc(Cl)c3)CC2)c1	5.05061	5.58503	-0.534417	CHEMBL4432710	CHEMBL4432710	TRUE
CC1=NC(c2cn(S(=O)(=O)c3ccccc3F)c3ccc(C)cc23)CN1	CC1=NC(c2cn(S(=O)(=O)c3ccccc3Cl)c3ccc(C)cc23)CN1	5.38722	5.92082	-0.533603	CHEMBL4372250	CHEMBL4372250	TRUE
O=C1C(=Cc2ccc(F)cc2)CC2(O)C3Cc4ccc(O)c5c4C2(CCN3CC2CC2)C1O5	O=C1C(=Cc2ccc(Cl)cc2)CC2(O)C3Cc4ccc(O)c5c4C2(CCN3CC2CC2)C1O5	7.67985	8.21254	-0.532686	CHEMBL4044348	CHEMBL4044348	TRUE
Fc1ccccc1Cn1ccc2c(N3CCC(F)(F)CC3)nc3ccccc3c21	FC1(F)CCN(c2nc3ccccc3c3c2ccn3Cc2ccccc2Cl)CC1	6.89963	7.4318	-0.532169	CHEMBL5164095	CHEMBL5164095	TRUE
COc1cc(C=CC(=O)NO)ccc1OCC(Cc1c[nH]c2ccccc12)NC(=O)c1ccccc1F	COc1cc(C=CC(=O)NO)ccc1OCC(Cc1c[nH]c2ccccc12)NC(=O)c1ccccc1Cl	7.11634	7.64782	-0.531479	CHEMBL4017597	CHEMBL4017597	TRUE
CC1(C)NC(=O)N(c2ccc(F)c(C(F)(F)F)c2)C1=O	CC1(C)NC(=O)N(c2ccc(Cl)c(C(F)(F)F)c2)C1=O	5.35655	5.88606	-0.529509	CHEMBL4681685	CHEMBL4681685	TRUE
CCOC(=O)c1cc(C#N)c(N2CCN(C(=O)NS(=O)(=O)c3ccc(F)cc3)CC2)nc1C(F)(F)F	CCOC(=O)c1cc(C#N)c(N2CCN(C(=O)NS(=O)(=O)c3ccc(Cl)cc3)CC2)nc1C(F)(F)F	6.63827	7.16749	-0.529219	CHEMBL2404825	CHEMBL2404825	TRUE
CCC1(NC(=O)c2ccc(OC)c(F)c2)CC2CN(CCc3c([nH]c4ccccc34)C(C(=O)OC)(c3cc4c(cc3OC)N(C)C3C(O)(C(=O)OC)C(OC(C)=O)C5(CC)C=CCN6CCC43C65)C2)C1	CCC1(NC(=O)c2ccc(OC)c(Cl)c2)CC2CN(CCc3c([nH]c4ccccc34)C(C(=O)OC)(c3cc4c(cc3OC)N(C)C3C(O)(C(=O)OC)C(OC(C)=O)C5(CC)C=CCN6CCC43C65)C2)C1	7.52288	8.05061	-0.527731	CHEMBL4019566	CHEMBL4019566	TRUE
CCCS(=O)(=O)Nc1ccc(F)c(NC(=O)c2cccc3c(N)ncnc23)c1F	CCCS(=O)(=O)Nc1ccc(F)c(NC(=O)c2cccc3c(N)ncnc23)c1Cl	8.73993	9.26761	-0.527678	CHEMBL4262904	CHEMBL4262904	TRUE
N#CC(=Cc1ccc(F)cc1)c1c[nH]c2ccccc12	N#CC(=Cc1ccc(Cl)cc1)c1c[nH]c2ccccc12	4.46852	4.99568	-0.527158	CHEMBL3755390	CHEMBL3755390	TRUE
O=C(O)C1CCC(CNc2nc(-c3ccccc3)cc(-c3ccc(F)cc3)n2)CC1	O=C(O)C1CCC(CNc2nc(-c3ccccc3)cc(-c3ccc(Cl)cc3)n2)CC1	6.1296	6.65561	-0.526012	CHEMBL3375358	CHEMBL3375358	TRUE
O=C(Nc1ccc(F)cc1Cl)c1cc(Cl)ccc1O	O=C(Nc1ccc(Cl)cc1Cl)c1cc(Cl)ccc1O	5.85078	6.37675	-0.52597	CHEMBL3606286	CHEMBL3606286	TRUE
O=C(Nc1ccc(F)cc1Cl)c1cc(Cl)ccc1O	O=C(Nc1ccc(Cl)cc1Cl)c1cc(Cl)ccc1O	5.85078	6.37675	-0.52597	CHEMBL3606286	CHEMBL3606286	TRUE
CCC(=O)NC1CCCc2c(-c3ccc(F)c(F)c3)cncc21	CCC(=O)NC1CCCc2c(-c3ccc(Cl)c(F)c3)cncc21	7.3279	7.85387	-0.52597	CHEMBL3626114	CHEMBL3626114	TRUE
O=[N+]([O-])CC(c1cccc(F)c1)c1c(-c2ccccc2)[nH]c2ccccc12	O=[N+]([O-])CC(c1cccc(Cl)c1)c1c(-c2ccccc2)[nH]c2ccccc12	5	5.52564	-0.525638	CHEMBL4672176	CHEMBL4672176	TRUE
CCN(CC)c1nc(Nc2ccc(F)cc2)c2cn[nH]c2n1	CCN(CC)c1nc(Nc2ccc(Cl)cc2)c2cn[nH]c2n1	5.4807	6.00393	-0.523229	CHEMBL2396138	CHEMBL2396138	TRUE
O=C(OC1C[N+]2(CCCc3ccc(F)cc3)CCC1CC2)C(O)(c1ccccc1)c1ccccc1	O=C(OC1C[N+]2(CCCc3ccc(Cl)cc3)CCC1CC2)C(O)(c1ccccc1)c1ccccc1	8.76955	9.29243	-0.522879	CHEMBL4390203	CHEMBL4390203	TRUE
Nc1nc(Nc2ccc(N3CCN(C4CC5CCC4C5)CC3)cc2)nn1-c1ncnc2ccc(F)cc12	Nc1nc(Nc2ccc(N3CCN(C4CC5CCC4C5)CC3)cc2)nn1-c1ncnc2ccc(Cl)cc12	8	8.52288	-0.522879	CHEMBL4057778	CHEMBL4057778	TRUE
NC1=NC2(c3cc(F)cc(NC(=O)c4ccc(F)cn4)c3)OCCC2CS1	NC1=NC2(c3cc(F)cc(NC(=O)c4ccc(Cl)cn4)c3)OCCC2CS1	5.69897	6.22185	-0.522879	CHEMBL3868309	CHEMBL3868309	TRUE
Nc1ncnc2c1sc1ncc(-c3ccc(F)cc3F)cc12	Nc1ncnc2c1sc1ncc(-c3ccc(F)cc3Cl)cc12	5.95861	6.48149	-0.522879	CHEMBL3412950	CHEMBL3412950	TRUE
CC(N)=NC(=NS(=O)(=O)c1ccc(F)cc1)N1CC(c2ccccc2)C(c2ccc(Cl)cc2)=N1	CC(N)=NC(=NS(=O)(=O)c1ccc(Cl)cc1)N1CC(c2ccccc2)C(c2ccc(Cl)cc2)=N1	7.22185	7.74473	-0.522879	CHEMBL3993768	CHEMBL3993768	TRUE
O=c1c(O)c(-c2ccc(F)cc2)oc2cc(Br)cc(Br)c12	O=c1c(O)c(-c2ccc(Cl)cc2)oc2cc(Br)cc(Br)c12	8.62709	9.14874	-0.521654	CHEMBL4714274	CHEMBL4714274	TRUE
CC(=O)Nc1ccc(S(=O)(=O)Nc2ccc(Oc3ccc(F)cc3)c(C#N)c2)cc1	CC(=O)Nc1ccc(S(=O)(=O)Nc2ccc(Oc3ccc(Cl)cc3)c(C#N)c2)cc1	5.97062	6.49214	-0.521528	CHEMBL4027199	CHEMBL4027199	TRUE
CCC(CC)OC1C=C(C(=O)NCc2cn(Cc3ccccc3F)nn2)CC(N)C1NC(C)=O	CCC(CC)OC1C=C(C(=O)NCc2cn(Cc3ccccc3Cl)nn2)CC(N)C1NC(C)=O	5.7986	6.31876	-0.520156	CHEMBL4403914	CHEMBL4403914	TRUE
O=c1c2c(F)cccc2nc(C2CC3(CC3)CN2c2ncnc3[nH]cnc23)n1-c1ccccc1	O=c1c2c(Cl)cccc2nc(C2CC3(CC3)CN2c2ncnc3[nH]cnc23)n1-c1ccccc1	7.36653	7.88606	-0.519525	CHEMBL4685225	CHEMBL4685225	TRUE
O=C(Cc1cccc(F)c1)n1sc2ccccc2c1=O	O=C(Cc1cccc(Cl)c1)n1sc2ccccc2c1=O	6.04648	6.56559	-0.519109	CHEMBL3371728	CHEMBL3371728	TRUE
COc1ccc2[nH]cc(C3CCCN(CCCCn4c(=O)c(-c5ccc(F)cc5)c5n(c4=O)CCCC5)C3)c2c1	COc1ccc2[nH]cc(C3CCCN(CCCCn4c(=O)c(-c5ccc(Cl)cc5)c5n(c4=O)CCCC5)C3)c2c1	7.11919	7.63827	-0.519086	CHEMBL4367995	CHEMBL4367995	TRUE
O=C(c1ccc(Cl)cc1)C1CCN(C(=O)c2ccc(F)cc2)CC1	O=C(c1ccc(Cl)cc1)C1CCN(C(=O)c2ccc(Cl)cc2)CC1	4.74958	5.26761	-0.518026	CHEMBL4681616	CHEMBL4681616	TRUE
CC(Cc1ccc(OCc2cccc(F)c2)cc1)N(C)CC(=O)O	CC(Cc1ccc(OCc2cccc(Cl)c2)cc1)N(C)CC(=O)O	6.06098	6.5784	-0.517416	CHEMBL4233812	CHEMBL4233812	TRUE
CC(Nc1ccccc1F)c1cc(C(=O)NCCN(C)C)cn2c(=O)cc(N3CCOCC3)nc12	CC(Nc1ccccc1Cl)c1cc(C(=O)NCCN(C)C)cn2c(=O)cc(N3CCOCC3)nc12	7.63827	8.1549	-0.51663	CHEMBL3366862	CHEMBL3366862	TRUE
Fc1cccc(Nc2nc(NC3CCNCC3)c3cc[nH]c3n2)c1	Clc1cccc(Nc2nc(NC3CCNCC3)c3cc[nH]c3n2)c1	6.78383	7.29843	-0.514598	CHEMBL5146658	CHEMBL5146658	TRUE
O=C1c2ccccc2C(=O)c2c1nnn2-c1ccc(F)cc1	O=C1c2ccccc2C(=O)c2c1nnn2-c1ccc(Cl)cc1	7.3098	7.82391	-0.514105	CHEMBL4709781	CHEMBL4709781	TRUE
Cc1cn(C2CCN(Cc3cccc(Oc4cccc(F)c4)c3)CC2)c(=O)[nH]c1=O	Cc1cn(C2CCN(Cc3cccc(Oc4cccc(Cl)c4)c3)CC2)c(=O)[nH]c1=O	5.5376	6.05061	-0.513008	CHEMBL4832952	CHEMBL4832952	TRUE
O=C(NNC(=O)c1occ(-c2ccccc2)c1-c1ccccc1)c1ccc(O)c(F)c1	O=C(NNC(=O)c1occ(-c2ccccc2)c1-c1ccccc1)c1ccc(O)c(Cl)c1	5.85387	6.36653	-0.51266	CHEMBL3372166	CHEMBL3372166	TRUE
N#Cc1ccc(N(CC(=O)N2CCC(CN)CC2)Cc2ccc(F)cc2)cc1	N#Cc1ccc(N(CC(=O)N2CCC(CN)CC2)Cc2ccc(Cl)cc2)cc1	5.88606	6.39794	-0.511883	CHEMBL4019803	CHEMBL4019803	TRUE
O=C(COc1ccc2c(-c3ccccc3)cc(=O)oc2c1)NN1C(=O)CSC1c1ccc(F)cc1	O=C(COc1ccc2c(-c3ccccc3)cc(=O)oc2c1)NN1C(=O)CSC1c1ccc(Cl)cc1	5.02826	5.5391	-0.510842	CHEMBL4123910	CHEMBL4123910	TRUE
Cc1cc(-c2ccc(F)cc2)nc(NCC2CCC(C(=O)O)CC2)n1	Cc1cc(-c2ccc(Cl)cc2)nc(NCC2CCC(C(=O)O)CC2)n1	5.07572	5.58503	-0.509306	CHEMBL3375358	CHEMBL3375358	TRUE
Fc1ccc(CCNCc2c(-c3ccc(Cl)cc3)nc3sccn23)cc1	Clc1ccc(CCNCc2c(-c3ccc(Cl)cc3)nc3sccn23)cc1	5.67778	6.18709	-0.509306	CHEMBL4354090	CHEMBL4354090	TRUE
C#CCN(C)C(C)Cc1ccc(NCc2cc(F)ccc2O)cc1	C#CCN(C)C(C)Cc1ccc(NCc2cc(Cl)ccc2O)cc1	6	6.50864	-0.508638	CHEMBL3587096	CHEMBL3587096	TRUE
C#CCN(C)C(C)Cc1ccc(NCc2cc(F)ccc2O)cc1	C#CCN(C)C(C)Cc1ccc(NCc2cc(Cl)ccc2O)cc1	6	6.50864	-0.508638	CHEMBL3587096	CHEMBL3587096	TRUE
Fc1ccccc1-c1ccc2[nH]ncc2c1	Clc1ccccc1-c1ccc2[nH]ncc2c1	5.4034	5.91009	-0.506692	CHEMBL3299551	CHEMBL3299551	TRUE
CC12CCC(OC(=O)c3ccc(F)cc3)CC1=CCC1C2CCC2(C)C(n3ccnc3)=C(C=O)CC12	CC12CCC(OC(=O)c3ccc(Cl)cc3)CC1=CCC1C2CCC2(C)C(n3ccnc3)=C(C=O)CC12	3.49485	4	-0.50515	CHEMBL3373392	CHEMBL3373392	TRUE
COc1cc(-c2cc(C(=O)O)c3ccccc3n2)ccc1OCC(=O)Nc1ccc(F)cc1	COc1cc(-c2cc(C(=O)O)c3ccccc3n2)ccc1OCC(=O)Nc1ccc(Cl)cc1	5.79588	6.30103	-0.50515	CHEMBL4813390	CHEMBL4813390	TRUE
CN(Cc1cc(=O)c(O)co1)c1cccc(F)c1	CN(Cc1cc(=O)c(O)co1)c1cccc(Cl)c1	5.49485	6	-0.50515	CHEMBL4478546	CHEMBL4478546	TRUE
NCCCCC1(C(=O)O)CN(Cc2ccccc2F)CCP1(=O)O	NCCCCC1(C(=O)O)CN(Cc2ccccc2Cl)CCP1(=O)O	6.28819	6.79317	-0.504981	CHEMBL4835313	CHEMBL4835313	TRUE
CC(N1CN(C2c3ccccc3SCc3cccc(F)c32)n2ccc(=O)c(O)c2C1=O)C(F)(F)F	CC(N1CN(C2c3ccccc3SCc3cccc(Cl)c32)n2ccc(=O)c(O)c2C1=O)C(F)(F)F	7.49757	8.00218	-0.504604	CHEMBL4702192	CHEMBL4702192	TRUE
Cn1c(-c2cccc(NC(=O)C(=O)Nc3cccc(F)c3)c2)c(I)c2cc(C(=O)O)c(O)cc21	Cn1c(-c2cccc(NC(=O)C(=O)Nc3cccc(Cl)c3)c2)c(I)c2cc(C(=O)O)c(O)cc21	5.33161	5.83565	-0.504033	CHEMBL3369282	CHEMBL3369282	TRUE
Cc1cc(-c2nnc3n2CCCCC3)c(C)n1-c1ccc(F)cc1	Cc1cc(-c2nnc3n2CCCCC3)c(C)n1-c1ccc(Cl)cc1	6.91721	7.42022	-0.503002	CHEMBL3107150	CHEMBL3107150	TRUE
O=C(Nc1cccnc1)c1ccccc1OCc1ccccc1F	O=C(Nc1cccnc1)c1ccccc1OCc1ccccc1Cl	5.45593	5.95861	-0.502675	CHEMBL4412720	CHEMBL4412720	TRUE
O=S(=O)(NCCCNc1cc(-c2[nH]c(-c3ccccc3)nc2-c2cccc(O)c2)ccn1)c1cccc(F)c1	O=S(=O)(NCCCNc1cc(-c2[nH]c(-c3ccccc3)nc2-c2cccc(O)c2)ccn1)c1cccc(Cl)c1	6.49349	6.99568	-0.502184	CHEMBL4689220	CHEMBL4689220	TRUE
Nc1ncc(-c2ccc(C(=O)O)cc2)cc1-c1ccc(F)cc1	Nc1ncc(-c2ccc(C(=O)O)cc2)cc1-c1ccc(Cl)cc1	8.11919	8.61979	-0.500602	CHEMBL4681994	CHEMBL4681994	TRUE
CC1CN(C(=O)C(=O)Nc2ccc3[nH]c(=O)oc3c2)CCN1c1ccc(F)c(F)c1	CC1CN(C(=O)C(=O)Nc2ccc3[nH]c(=O)oc3c2)CCN1c1ccc(Cl)c(F)c1	8	8.50004	-0.500038	CHEMBL4321003	CHEMBL4321003	TRUE
CN(Cc1ccc2nccn2c1)c1nnc(-c2ccc(-c3ccccc3F)cc2)o1	CN(Cc1ccc2nccn2c1)c1nnc(-c2ccc(-c3ccccc3Cl)cc2)o1	7.79997	8.29999	-0.500018	CHEMBL4828157	CHEMBL4828157	TRUE
COc1cc(N2C(=O)N(Cc3c(F)cc(F)cc3F)c3ccccc3S2(=O)=O)cnc1OC	COc1cc(N2C(=O)N(Cc3c(F)cc(F)cc3Cl)c3ccccc3S2(=O)=O)cnc1OC	8.29999	8.79997	-0.499982	CHEMBL3742876	CHEMBL3742876	TRUE
Cn1c(N2CCNC(c3ccccc3F)C2)nc(-c2ccncn2)cc1=O	Cn1c(N2CCNC(c3ccccc3Cl)C2)nc(-c2ccncn2)cc1=O	8.08619	8.58503	-0.498841	CHEMBL4057861	CHEMBL4057861	TRUE
Cc1cc(C=CC(=O)c2ccc(F)cc2)cc(C)c1O	Cc1cc(C=CC(=O)c2ccc(Cl)cc2)cc(C)c1O	4.91009	5.40894	-0.498841	CHEMBL4818405	CHEMBL4818405	TRUE
Cc1c2cc(-n3ccc(OCc4ccc(F)cc4)cc3=O)ccc2nn1C	Cc1c2cc(-n3ccc(OCc4ccc(Cl)cc4)cc3=O)ccc2nn1C	6.95861	7.45593	-0.497325	CHEMBL3795818	CHEMBL3795818	TRUE
Fc1cccc(C[n+]2ccc(Cn3c4ccccc4c4ccccc43)cc2)c1	Clc1cccc(C[n+]2ccc(Cn3c4ccccc4c4ccccc43)cc2)c1	5.95861	6.45593	-0.497325	CHEMBL4236742	CHEMBL4236742	TRUE
Cc1cc(S(=O)(=O)C2CCCC2)cc(=O)n1C(CC1CCCCO1)C(=O)Nc1ncc(F)s1	Cc1cc(S(=O)(=O)C2CCCC2)cc(=O)n1C(CC1CCCCO1)C(=O)Nc1ncc(Cl)s1	6.30103	6.79588	-0.49485	CHEMBL2353001	CHEMBL2353001	TRUE
COc1ccc(S(=O)(=O)C=Cc2ncccc2F)cc1	COc1ccc(S(=O)(=O)C=Cc2ncccc2Cl)cc1	5.96537	6.45967	-0.494299	CHEMBL4331808	CHEMBL4331808	TRUE
NCCc1ccc(OCc2cccc(F)c2)cc1	NCCc1ccc(OCc2cccc(Cl)c2)cc1	6.71444	7.20761	-0.493166	CHEMBL4182524	CHEMBL4182524	TRUE
O=C(NO)c1ccc(CCCN2CCC(CNC3CC3c3ccc(-c4ccc(F)cc4)cc3)CC2)cc1	O=C(NO)c1ccc(CCCN2CCC(CNC3CC3c3ccc(-c4ccc(Cl)cc4)cc3)CC2)cc1	7.22915	7.72125	-0.492098	CHEMBL4724379	CHEMBL4724379	TRUE
Fc1ccccc1-c1nc(NCc2ccc(-c3cccnc3)cc2)c2ccccc2n1	Clc1ccccc1-c1nc(NCc2ccc(-c3cccnc3)cc2)c2ccccc2n1	5.18709	5.67778	-0.490694	CHEMBL3375263	CHEMBL3375263	TRUE
O=C1OC(c2ccc(F)cc2)CN1c1cccc(F)c1	O=C1OC(c2ccc(F)cc2)CN1c1cccc(Cl)c1	6.76955	7.25964	-0.490086	CHEMBL4026560	CHEMBL4026560	TRUE
COC(=O)Cn1cnc2cc(C(=O)NCCOCc3ccc(C(F)(F)F)cc3)c(-c3cccc(F)c3)cc2c1=O	COC(=O)Cn1cnc2cc(C(=O)NCCOCc3ccc(C(F)(F)F)cc3)c(-c3cccc(Cl)c3)cc2c1=O	5.46092	5.95078	-0.489858	CHEMBL4710716	CHEMBL4710716	TRUE
CCCS(=O)(=O)Nc1ccc(F)c(NC(=O)c2cccc3c(N)ncnc23)c1F	CCCS(=O)(=O)Nc1ccc(Cl)c(NC(=O)c2cccc3c(N)ncnc23)c1F	8.73993	9.22915	-0.489219	CHEMBL4262904	CHEMBL4262904	TRUE
O=S1(=O)c2ccccc2CN1c1cc(F)cc(Oc2ccccn2)c1	O=S1(=O)c2ccccc2CN1c1cc(Cl)cc(Oc2ccccn2)c1	6.90999	7.39794	-0.487951	CHEMBL3860586	CHEMBL3860586	TRUE
O=S(=O)(c1ccc(F)c(F)c1)N1CCCC(Cn2ccnc2)C1	O=S(=O)(c1ccc(F)c(Cl)c1)N1CCCC(Cn2ccnc2)C1	7.36653	7.85387	-0.48734	CHEMBL3806799	CHEMBL3806799	TRUE
O=C(NCCOCc1ccc(C(F)(F)F)cc1)c1cc2nc[nH]c(=O)c2cc1-c1cccc(F)c1	O=C(NCCOCc1ccc(C(F)(F)F)cc1)c1cc2nc[nH]c(=O)c2cc1-c1cccc(Cl)c1	5.38616	5.8729	-0.486737	CHEMBL4710716	CHEMBL4710716	TRUE
O=S(=O)(Nc1nccs1)c1ccc(NCc2cccc(F)c2O)cc1	O=S(=O)(Nc1nccs1)c1ccc(NCc2cccc(Cl)c2O)cc1	4.72125	5.20761	-0.486362	CHEMBL3116602	CHEMBL3116602	TRUE
CC(C)C1(C(=O)N2CCc3ccc(C(F)(F)F)cc3C2)CCC(NC2CCc3cc(F)ccc32)C1	CC(C)C1(C(=O)N2CCc3ccc(C(F)(F)F)cc3C2)CCC(NC2CCc3cc(Cl)ccc32)C1	8.3098	8.79588	-0.486076	CHEMBL3418234	CHEMBL3418234	TRUE
COc1ccc(S(=O)(=O)n2cc(C(F)F)c3ccc(F)cc32)cc1N1CCNCC1	COc1ccc(S(=O)(=O)n2cc(C(F)F)c3ccc(Cl)cc32)cc1N1CCNCC1	9.58503	10.0706	-0.485554	CHEMBL5118310	CHEMBL5118310	TRUE
O=C(O)COc1ccc(C=C2C(=O)N(c3ccc(F)cc3)N=C2c2ccccc2)cc1	O=C(O)COc1ccc(C=C2C(=O)N(c3ccc(Cl)cc3)N=C2c2ccccc2)cc1	4.4022	4.88739	-0.4852	CHEMBL4771698	CHEMBL4771698	TRUE
O=C(NCc1cc(Cl)ccc1-n1cnnn1)C1CC2CC2N1C(=O)C(O)c1cccc(F)c1	O=C(NCc1cc(Cl)ccc1-n1cnnn1)C1CC2CC2N1C(=O)C(O)c1cccc(Cl)c1	8.23657	8.72125	-0.484674	CHEMBL3788412	CHEMBL3788412	TRUE
Fc1cccc(C[n+]2cccc(Cn3c4ccccc4c4ccccc43)c2)c1	Clc1cccc(C[n+]2cccc(Cn3c4ccccc4c4ccccc43)c2)c1	4	4.48413	-0.484126	CHEMBL4236741	CHEMBL4236741	TRUE
O=C1Nc2ccc(C(=O)NC(CO)c3ccccc3)cc2C1=C(c1ccc(F)c(F)c1)c1ncc[nH]1	O=C1Nc2ccc(C(=O)NC(CO)c3ccccc3)cc2C1=C(c1ccc(Cl)c(F)c1)c1ncc[nH]1	5	5.48346	-0.483465	CHEMBL4155717	CHEMBL4155717	TRUE
Cc1noc(C)c1-c1ccc2nc(N3CCN(CCN(C)C)CC3)nc(NCc3cccc(F)c3)c2c1	Cc1noc(C)c1-c1ccc2nc(N3CCN(CCN(C)C)CC3)nc(NCc3cccc(Cl)c3)c2c1	6.76955	7.25181	-0.482261	CHEMBL4264627	CHEMBL4264627	TRUE
C=CC(=O)N1CCN2c3ncnc4cc(-c5c(O)cccc5F)c(Cl)c(c34)OCC2C1	C=CC(=O)N1CCN2c3ncnc4cc(-c5c(O)cccc5Cl)c(Cl)c(c34)OCC2C1	7.01323	7.49485	-0.481622	CHEMBL4385318	CHEMBL4385318	TRUE
O=C(CCCN1CCC(O)(c2ccc(Cl)cc2)CC1)c1ccccc1F	O=C(CCCN1CCC(O)(c2ccc(Cl)cc2)CC1)c1ccccc1Cl	7.99012	8.47006	-0.479932	CHEMBL4416273	CHEMBL4416273	TRUE
COc1cc(C=CC(=O)NCC(=O)Nc2ccccc2F)ccc1O	COc1cc(C=CC(=O)NCC(=O)Nc2ccccc2Cl)ccc1O	4.76371	5.2426	-0.478889	CHEMBL4769502	CHEMBL4769502	TRUE
COc1ccc(-c2nnc(-c3ccc(C(=O)NN=Cc4ccccc4F)cc3)o2)c(OC)c1	COc1ccc(-c2nnc(-c3ccc(C(=O)NN=Cc4ccccc4Cl)cc3)o2)c(OC)c1	4.73377	5.21183	-0.478063	CHEMBL3599824	CHEMBL3599824	TRUE
COc1ccc(-c2nnc(-c3ccc(C(=O)NN=Cc4ccccc4F)cc3)o2)c(OC)c1	COc1ccc(-c2nnc(-c3ccc(C(=O)NN=Cc4ccccc4Cl)cc3)o2)c(OC)c1	4.73377	5.21183	-0.478063	CHEMBL3599824	CHEMBL3599824	TRUE
NC(=S)Nc1nn2c(=O)[nH]c(=S)[nH]c2c1Cc1ccc(F)cc1	NC(=S)Nc1nn2c(=O)[nH]c(=S)[nH]c2c1Cc1ccc(Cl)cc1	4.645	5.123	-0.478	CHEMBL3242472	CHEMBL3242472	TRUE
Cc1cc(C)c(Nc2ccc(Cl)c(F)c2)c(C)c1	Cc1cc(C)c(Nc2ccc(Cl)c(Cl)c2)c(C)c1	5.48149	5.95861	-0.477121	CHEMBL3810792	CHEMBL3810792	TRUE
Cc1cc(C)c(Nc2ccc(F)c(F)c2)c(C)c1	Cc1cc(C)c(Nc2ccc(F)c(Cl)c2)c(C)c1	5.06048	5.5376	-0.477121	CHEMBL3810792	CHEMBL3810792	TRUE
NC1CCc2cccc(-c3ccc(F)cc3)c2CC1=O	NC1CCc2cccc(-c3ccc(Cl)cc3)c2CC1=O	8.22185	8.69897	-0.477121	CHEMBL3599783	CHEMBL3599783	TRUE
NC(C(=O)Nc1cncc(F)c1CCC1CNC(COC(=O)NCC(F)(F)F)CO1)C(c1ccc(F)cc1)c1cc(F)cc(F)c1	NC(C(=O)Nc1cncc(F)c1CCC1CNC(COC(=O)NCC(F)(F)F)CO1)C(c1ccc(Cl)cc1)c1cc(F)cc(F)c1	8.61979	9.09691	-0.477121	CHEMBL3829230	CHEMBL3829230	TRUE
CN(CC=Cc1ccc(F)cc1)Cc1ccc2c(c1)OCCO2	CN(CC=Cc1ccc(Cl)cc1)Cc1ccc2c(c1)OCCO2	7.6968	8.17393	-0.477121	CHEMBL4255803	CHEMBL4255803	TRUE
O=C(O)CCC(=O)NC(CC(=O)O)Cc1ccc(-c2ccccc2F)cc1	O=C(O)CCC(=O)NC(CC(=O)O)Cc1ccc(-c2ccccc2Cl)cc1	7.61979	8.09691	-0.477121	CHEMBL4339144	CHEMBL4339144	TRUE
N#CC1(Cc2ccc(O)cc2F)CCc2cc(O)ccc21	N#CC1(Cc2ccc(O)cc2Cl)CCc2cc(O)ccc21	9.82391	10.301	-0.477121	CHEMBL4719154	CHEMBL4719154	TRUE
NC1CCc2cccc(-c3ccc(F)cc3)c2CC1=O	NC1CCc2cccc(-c3ccc(Cl)cc3)c2CC1=O	8.22185	8.69897	-0.477121	CHEMBL3599783	CHEMBL3599783	TRUE
CCn1ncc2c1CCC(Nc1nc3c(-c4ccc(F)cc4)cccn3n1)C2	CCn1ncc2c1CCC(Nc1nc3c(-c4ccc(Cl)cc4)cccn3n1)C2	6.74473	7.22185	-0.477121	CHEMBL4122732	CHEMBL4122732	TRUE
O=C(O)C(S)=Cc1c(F)cccc1Cl	O=C(O)C(S)=Cc1c(Cl)cccc1Cl	7.52288	8	-0.477121	CHEMBL4121747	CHEMBL4121747	TRUE
O=C(Nc1cnc(-n2nccn2)c(Cl)c1)Nc1cnc2ccc(F)cc2c1C1CC1	O=C(Nc1cnc(-n2nccn2)c(Cl)c1)Nc1cnc2ccc(Cl)cc2c1C1CC1	8.22185	8.69897	-0.477121	CHEMBL4667669	CHEMBL4667669	TRUE
CCOc1nc(NC(=O)C(C)(C)NC(=O)c2ccc3c(C4CCCC4)c(-c4ccc(F)cn4)n(C)c3c2)cnc1C=CC(=O)O	CCOc1nc(NC(=O)C(C)(C)NC(=O)c2ccc3c(C4CCCC4)c(-c4ccc(Cl)cn4)n(C)c3c2)cnc1C=CC(=O)O	7.74473	8.22185	-0.477121	CHEMBL3412083	CHEMBL3412083	TRUE
O=C(Nc1ccc(F)cc1C(=O)O)c1ccc(-c2ccccc2)cc1	O=C(Nc1ccc(Cl)cc1C(=O)O)c1ccc(-c2ccccc2)cc1	3.86012	4.33724	-0.477121	CHEMBL2446350	CHEMBL2446350	TRUE
CC1COc2c(N3CCC(C4(N)CC4)C3)cc(F)c3cc(C(=O)O)c(=O)n1c23	CC1COc2c(N3CCC(C4(N)CC4)C3)cc(Cl)c3cc(C(=O)O)c(=O)n1c23	3.89963	4.37675	-0.477121	CHEMBL4809364	CHEMBL4809364	TRUE
O=C(O)CCc1nc(-c2ccc(F)cc2)c(-c2ccccc2)o1	O=C(O)CCc1nc(-c2ccc(Cl)cc2)c(-c2ccccc2)o1	5.04576	5.52288	-0.477121	CHEMBL4415258	CHEMBL4415258	TRUE
O=C(C=Cc1ccc(F)cc1)Nc1ccccc1C(=O)O	O=C(C=Cc1ccc(Cl)cc1)Nc1ccccc1C(=O)O	4.52288	5	-0.477121	CHEMBL4347275	CHEMBL4347275	TRUE
O=C(CNc1ccc(F)cc1)NO	O=C(CNc1ccc(Cl)cc1)NO	5.13018	5.6073	-0.477121	CHEMBL4156363	CHEMBL4156363	TRUE
Fc1ccc(COC2CCN(Cc3ccc4[nH]ncc4c3)CC2)cc1F	Fc1cc(COC2CCN(Cc3ccc4[nH]ncc4c3)CC2)ccc1Cl	5.76195	6.23657	-0.474618	CHEMBL5145660	CHEMBL5145660	TRUE
O=C1SC(=Cc2ccc3c(c2)OCO3)C(=O)N1Cc1cn(-c2ccc(F)cc2)nn1	O=C1SC(=Cc2ccc3c(c2)OCO3)C(=O)N1Cc1cn(-c2ccc(Cl)cc2)nn1	7	7.47366	-0.473661	CHEMBL3089764	CHEMBL3089764	TRUE
Cn1cc(C(=O)Nc2ccc3oc(SCc4cccc(F)c4)nc3c2)c(C(F)F)n1	Cn1cc(C(=O)Nc2ccc3oc(SCc4cccc(Cl)c4)nc3c2)c(C(F)F)n1	6.61261	7.08619	-0.473576	CHEMBL3418823	CHEMBL3418823	TRUE
CCC1OC(=O)C(C)C(OC2CC(C)(OC)C(O)C(C)O2)C(C)C(OC2OC(C)CC(N(C)C)C2O)C(C)(O)CC(C)CN(CCCCc2cn(CCc3c[nH]c4ccc(F)cc34)nn2)C(C)C(O)C1(C)O	CCC1OC(=O)C(C)C(OC2CC(C)(OC)C(O)C(C)O2)C(C)C(OC2OC(C)CC(N(C)C)C2O)C(C)(O)CC(C)CN(CCCCc2cn(CCc3c[nH]c4ccc(Cl)cc34)nn2)C(C)C(O)C1(C)O	5.58503	6.05552	-0.470491	CHEMBL3602325	CHEMBL3602325	TRUE
CCC1OC(=O)C(C)C(OC2CC(C)(OC)C(O)C(C)O2)C(C)C(OC2OC(C)CC(N(C)C)C2O)C(C)(O)CC(C)CN(CCCCc2cn(CCc3c[nH]c4ccc(F)cc34)nn2)C(C)C(O)C1(C)O	CCC1OC(=O)C(C)C(OC2CC(C)(OC)C(O)C(C)O2)C(C)C(OC2OC(C)CC(N(C)C)C2O)C(C)(O)CC(C)CN(CCCCc2cn(CCc3c[nH]c4ccc(Cl)cc34)nn2)C(C)C(O)C1(C)O	5.58503	6.05552	-0.470491	CHEMBL3602325	CHEMBL3602325	TRUE
O=C(Nc1ccc(F)cc1)c1cc(Cl)ccc1O	O=C(Nc1ccc(Cl)cc1)c1cc(Cl)ccc1O	5.41567	5.88606	-0.470388	CHEMBL3606286	CHEMBL3606286	TRUE
O=C(Nc1ccc(F)cc1)c1cc(Cl)ccc1O	O=C(Nc1ccc(Cl)cc1)c1cc(Cl)ccc1O	5.41567	5.88606	-0.470388	CHEMBL3606286	CHEMBL3606286	TRUE
Cc1ccc(S(=O)(=O)N2CC3(CC2C(=O)NN=Cc2ccccc2F)SCCS3)cc1	Cc1ccc(S(=O)(=O)N2CC3(CC2C(=O)NN=Cc2ccccc2Cl)SCCS3)cc1	5.72354	6.19382	-0.470282	CHEMBL3776792	CHEMBL3776792	TRUE
O=S(=O)(c1cccc(F)c1)N1CCN(c2nc(NCCN3CCOCC3)nc(N3CCOCC3)n2)CC1	O=S(=O)(c1cccc(Cl)c1)N1CCN(c2nc(NCCN3CCOCC3)nc(N3CCOCC3)n2)CC1	6.95683	7.42655	-0.469714	CHEMBL4689246	CHEMBL4689246	TRUE
O=C(Nc1nc(-c2ccccc2)c(F)s1)N(CCC(c1ccccc1)c1ccccc1)CCN1CCOCC1	O=C(Nc1nc(-c2ccccc2)c(Cl)s1)N(CCC(c1ccccc1)c1ccccc1)CCN1CCOCC1	7.27572	7.74473	-0.469003	CHEMBL3096900	CHEMBL3096900	TRUE
O=C(c1ccc(Sc2ccc(F)cc2)cc1)C1CCN(C(=O)c2cccc(O)c2)CC1	O=C(c1ccc(Sc2ccc(Cl)cc2)cc1)C1CCN(C(=O)c2cccc(O)c2)CC1	7.29585	7.76447	-0.468622	CHEMBL4832170	CHEMBL4832170	TRUE
CCCS(=O)(=O)Nc1ccc(F)c(NC(=O)c2csc3c(N)ncnc23)c1F	CCCS(=O)(=O)Nc1ccc(F)c(NC(=O)c2csc3c(N)ncnc23)c1Cl	8.48999	8.95861	-0.468616	CHEMBL4262904	CHEMBL4262904	TRUE
CC(Oc1ccc(F)cc1F)C(=O)NCc1ccc2c(c1)OCO2	CC(Oc1ccc(F)cc1Cl)C(=O)NCc1ccc2c(c1)OCO2	4	4.46852	-0.468521	CHEMBL3399534	CHEMBL3399534	TRUE
CC(Oc1ccc(F)cc1F)C(=O)NCc1ccc2c(c1)OCO2	CC(Oc1ccc(F)cc1Cl)C(=O)NCc1ccc2c(c1)OCO2	4	4.46852	-0.468521	CHEMBL3399534	CHEMBL3399534	TRUE
O=C(O)CCN1C(=O)C(=Cc2ccc(F)cc2)SC1=S	O=C(O)CCN1C(=O)C(=Cc2ccc(Cl)cc2)SC1=S	4.35655	4.82391	-0.467361	CHEMBL4188872	CHEMBL4188872	TRUE
Cc1cc(C)cc(Nc2nccc(-c3c(-c4ccc(F)cc4)ncn3C3CCNCC3)n2)c1	Cc1cc(C)cc(Nc2nccc(-c3c(-c4ccc(Cl)cc4)ncn3C3CCNCC3)n2)c1	5.42022	5.88606	-0.46584	CHEMBL5044554	CHEMBL5044554	TRUE
O=c1oc2ccc(F)cc2n1Cc1cccc(F)c1	O=c1oc2ccc(Cl)cc2n1Cc1cccc(F)c1	4.54531	5.011	-0.465688	CHEMBL4191920	CHEMBL4191920	TRUE
Nc1nccn2c(C3CCC3)nc(-c3ccc(Oc4ccc(F)cc4)cc3)c12	Nc1nccn2c(C3CCC3)nc(-c3ccc(Oc4ccc(Cl)cc4)cc3)c12	5.26281	5.72816	-0.465351	CHEMBL2329236	CHEMBL2329236	TRUE
OC(CNc1cc(-c2ccc(F)cc2)ncn1)c1ccccc1	OC(CNc1cc(-c2ccc(Cl)cc2)ncn1)c1ccccc1	5	5.46433	-0.464326	CHEMBL3123528	CHEMBL3123528	TRUE
O=C(COc1ccc(F)cc1)N1CCN(c2ccc([N+](=O)[O-])cc2)CC1	O=C(COc1ccc(Cl)cc1)N1CCN(c2ccc([N+](=O)[O-])cc2)CC1	5.19382	5.65758	-0.463757	CHEMBL4432710	CHEMBL4432710	TRUE
Cc1ncc2sc(C(=O)N3CCCC3c3ccc(F)cc3)nn12	Cc1ncc2sc(C(=O)N3CCCC3c3ccc(Cl)cc3)nn12	6.5376	7	-0.462398	CHEMBL3854802	CHEMBL3854802	TRUE
O=c1[nH]nc2ccc(Sc3ccccc3F)nn12	O=c1[nH]nc2ccc(Sc3ccccc3Cl)nn12	7.06048	7.52288	-0.462398	CHEMBL5041229	CHEMBL5041229	TRUE
CN1c2ccc(-c3cnc(N)c(F)c3N3CCC4(CC3)CNC(=O)O4)cc2CS1(=O)=O	CN1c2ccc(-c3cnc(N)c(Cl)c3N3CCC4(CC3)CNC(=O)O4)cc2CS1(=O)=O	8.25964	8.72125	-0.461609	CHEMBL3803436	CHEMBL3803436	TRUE
O=S(=O)(Nc1ncns1)c1cc(F)c(OCC2CNCCC2c2ccc(F)c(F)c2)cc1F	O=S(=O)(Nc1ncns1)c1cc(F)c(OCC2CNCCC2c2ccc(Cl)c(F)c2)cc1F	8.58503	9.04576	-0.460731	CHEMBL3390669	CHEMBL3390669	TRUE
O=C(Nc1ccc2[nH]ccc2n1)c1ccc(F)c(Cl)c1	O=C(Nc1ccc2[nH]ccc2n1)c1ccc(Cl)c(Cl)c1	8.48999	8.95001	-0.460016	CHEMBL4385037	CHEMBL4385037	TRUE
O=c1c2cnn(-c3ccc(F)cc3)c2ncn1CC1(O)CCN(Cc2ccccc2F)CC1	O=c1c2cnn(-c3ccc(F)cc3)c2ncn1CC1(O)CCN(Cc2ccccc2Cl)CC1	5.00877	5.46852	-0.459747	CHEMBL4687433	CHEMBL4687433	TRUE
NS(=O)(=O)c1ccc(N2CCN=C2c2cccc(F)c2)cc1	NS(=O)(=O)c1ccc(N2CCN=C2c2cccc(Cl)c2)cc1	5.14267	5.60206	-0.459392	CHEMBL3365665	CHEMBL3365665	TRUE
COc1ccc(F)cc1-c1ccnc(Nc2ccc(N3CCOCC3)c(OC)c2)c1	COc1ccc(Cl)cc1-c1ccnc(Nc2ccc(N3CCOCC3)c(OC)c2)c1	6.92812	7.38722	-0.459098	CHEMBL2320000	CHEMBL2320000	TRUE
CC(C)(C)NC(=O)[CH]1C[CH]2CCCC[CH]2CN1C[CH](O)CNCc1ccc(F)cc1	CC(C)(C)NC(=O)[CH]1C[CH]2CCCC[CH]2CN1C[CH](O)CNCc1ccc(Cl)cc1	6.16115	6.61979	-0.458638	CHEMBL5118626	CHEMBL5118626	TRUE
O=C(CC(CC1CCCC1)C(=O)N1CC2(CC2)CC1c1nc(-c2ccc(C(F)(F)F)cc2F)no1)NO	O=C(CC(CC1CCCC1)C(=O)N1CC2(CC2)CC1c1nc(-c2ccc(C(F)(F)F)cc2Cl)no1)NO	5	5.45717	-0.457175	CHEMBL4619396	CHEMBL4619396	TRUE
O=c1ccc2cc(N=Cc3ccc(F)cc3)ccc2o1	O=c1ccc2cc(N=Cc3ccc(Cl)cc3)ccc2o1	6.64589	7.10292	-0.457031	CHEMBL4408814	CHEMBL4408814	TRUE
CC(N1CN(C2c3ccccc3CSc3c(F)cccc32)n2ccc(=O)c(O)c2C1=O)C(F)(F)F	CC(N1CN(C2c3ccccc3CSc3c(Cl)cccc32)n2ccc(=O)c(O)c2C1=O)C(F)(F)F	7.17783	7.63451	-0.45668	CHEMBL4702192	CHEMBL4702192	TRUE
OCCN1CCN(c2nc(Nc3ccc(F)cc3)c3ccccc3n2)CC1	OCCN1CCN(c2nc(Nc3ccc(Cl)cc3)c3ccccc3n2)CC1	4.67244	5.12901	-0.456574	CHEMBL3610647	CHEMBL3610647	TRUE
Cc1ccnc(NC(c2ccc3cccnc3c2O)c2c(F)cccc2Cl)c1	Cc1ccnc(NC(c2ccc3cccnc3c2O)c2c(Cl)cccc2Cl)c1	4.68613	5.14267	-0.456535	CHEMBL4729814	CHEMBL4729814	TRUE
O=c1[nH]c(CSc2nc3c(-c4ccc(F)cc4)cnn3c(=O)[nH]2)c(Cl)c(=O)[nH]1	O=c1[nH]c(CSc2nc3c(-c4ccc(Cl)cc4)cnn3c(=O)[nH]2)c(Cl)c(=O)[nH]1	5.09691	5.55284	-0.455932	CHEMBL3088704	CHEMBL3088704	TRUE
NC(=O)c1cc(NC(=O)c2cc(-c3ccccn3)c(F)cc2Cl)n(-c2ccccc2)n1	NC(=O)c1cc(NC(=O)c2cc(-c3ccccn3)c(Cl)cc2Cl)n(-c2ccccc2)n1	7.39794	7.85387	-0.455932	CHEMBL4309191	CHEMBL4309191	TRUE
CN1CCN(c2ncnc3oc(-c4ccccc4F)nc23)CC1	CN1CCN(c2ncnc3oc(-c4ccccc4Cl)nc23)CC1	6	6.45593	-0.455932	CHEMBL4147288	CHEMBL4147288	TRUE
O=S(=O)(c1ccc(F)cc1)N1CCN(c2nc(NCCN3CCOCC3)nc(N3CCOCC3)n2)CC1	O=S(=O)(c1ccc(Cl)cc1)N1CCN(c2nc(NCCN3CCOCC3)nc(N3CCOCC3)n2)CC1	7.05537	7.51046	-0.455094	CHEMBL4689246	CHEMBL4689246	TRUE
O=C(Nc1ccc(F)cc1F)c1cc(Cl)ccc1O	O=C(Nc1ccc(F)cc1Cl)c1cc(Cl)ccc1O	5.39577	5.85078	-0.455007	CHEMBL3606286	CHEMBL3606286	TRUE
O=C(Nc1ccc(F)cc1F)c1cc(Cl)ccc1O	O=C(Nc1ccc(F)cc1Cl)c1cc(Cl)ccc1O	5.39577	5.85078	-0.455007	CHEMBL3606286	CHEMBL3606286	TRUE
O=C(Nc1ccc(NCc2ccc(F)cc2)cc1Cl)c1cc(Cl)ccc1O	O=C(Nc1ccc(NCc2ccc(Cl)cc2)cc1Cl)c1cc(Cl)ccc1O	5.46852	5.92082	-0.452298	CHEMBL4704510	CHEMBL4704510	TRUE
CCCS(=O)(=O)Nc1ccc(F)c(C(=O)Nc2cnc3[nH]cc(OC)c3c2)c1F	CCCS(=O)(=O)Nc1ccc(Cl)c(C(=O)Nc2cnc3[nH]cc(OC)c3c2)c1F	8.31876	8.77006	-0.451304	CHEMBL4262904	CHEMBL4262904	TRUE
Fc1ccc(Oc2c(F)cc(COc3ccn4c(-c5cncnc5)cnc4n3)cc2F)cc1C(F)(F)F	Fc1cc(COc2ccn3c(-c4cncnc4)cnc3n2)cc(F)c1Oc1ccc(Cl)c(C(F)(F)F)c1	8.18709	8.63827	-0.451186	CHEMBL3635122	CHEMBL3635122	TRUE
CC1(c2cc(NC(=O)c3ccc(F)cn3)ccc2F)CCSC(N)=N1	CC1(c2cc(NC(=O)c3ccc(Cl)cn3)ccc2F)CCSC(N)=N1	7.88606	8.33724	-0.451186	CHEMBL4304965	CHEMBL4304965	TRUE
Cc1ccc(OCc2nc(CN(CC(C)C)C(=O)c3cccc(F)c3)cs2)cc1	Cc1ccc(OCc2nc(CN(CC(C)C)C(=O)c3cccc(Cl)c3)cs2)cc1	5.61439	6.0655	-0.451108	CHEMBL5134982	CHEMBL5134982	TRUE
NC(=O)C1CCC(CNc2nc(NCc3ccccc3)cc(-c3ccc(F)cc3)n2)CC1	NC(=O)C1CCC(CNc2nc(NCc3ccccc3)cc(-c3ccc(Cl)cc3)n2)CC1	6.52433	6.97469	-0.450365	CHEMBL3375358	CHEMBL3375358	TRUE
O=C(c1ccc(-c2ccccc2F)o1)N1CCN(Cc2ccc(OC3CCNCC3)c(Cl)c2)CC1	O=C(c1ccc(-c2ccccc2Cl)o1)N1CCN(Cc2ccc(OC3CCNCC3)c(Cl)c2)CC1	7.03152	7.48149	-0.449969	CHEMBL4332940	CHEMBL4332940	TRUE
O=c1c(O)c(-c2ccc(O)c(O)c2)oc2c(CNCc3cccc(F)c3)c(O)cc(O)c12	O=c1c(O)c(-c2ccc(O)c(O)c2)oc2c(CNCc3cccc(Cl)c3)c(O)cc(O)c12	6.20761	6.65758	-0.449969	CHEMBL3376036	CHEMBL3376036	TRUE
CC(=NNC(=O)CNC1CC1c1ccc(F)c(F)c1)c1ccc(F)cc1	CC(=NNC(=O)CNC1CC1c1ccc(F)c(F)c1)c1ccc(Cl)cc1	6.19984	6.64954	-0.449699	CHEMBL4180198	CHEMBL4180198	TRUE
COc1cc(N(CC2CC2)c2ccc(F)c3ccccc23)cnc1C(=O)C1CC1C(=O)O	COc1cc(N(CC2CC2)c2ccc(Cl)c3ccccc23)cnc1C(=O)C1CC1C(=O)O	7.57675	8.02641	-0.449656	CHEMBL4378184	CHEMBL4378184	TRUE
Fc1ccc(COC2CCN(Cc3ccc4[nH]cnc4c3)CC2)cc1F	Fc1cc(COC2CCN(Cc3ccc4[nH]cnc4c3)CC2)ccc1Cl	5.37	5.81879	-0.448786	CHEMBL5145660	CHEMBL5145660	TRUE
Cn1cc(C(=O)Nc2ccc3oc(SCc4cccc(F)c4)nc3c2)c(C(F)(F)F)n1	Cn1cc(C(=O)Nc2ccc3oc(SCc4cccc(Cl)c4)nc3c2)c(C(F)(F)F)n1	6.37882	6.82681	-0.44799	CHEMBL3418823	CHEMBL3418823	TRUE
Nc1ccccc1NC(=O)CCCCCNC(=O)CN1C(=O)C2(OCCO2)c2cc(F)ccc21	Nc1ccccc1NC(=O)CCCCCNC(=O)CN1C(=O)C2(OCCO2)c2cc(Cl)ccc21	4.56575	5.01323	-0.447478	CHEMBL4035693	CHEMBL4035693	TRUE
O=C(c1ccc(-c2nc(-c3ccc(C(F)(F)F)cc3)no2)nc1)N1CCN(Cc2ccc(F)cc2)CC1	O=C(c1ccc(-c2nc(-c3ccc(C(F)(F)F)cc3)no2)nc1)N1CCN(Cc2ccc(Cl)cc2)CC1	6.51713	6.96457	-0.447444	CHEMBL5111285	CHEMBL5111285	TRUE
Fc1ccc(CCSc2ncnc3[nH]cnc23)cc1	Clc1ccc(CCSc2ncnc3[nH]cnc23)cc1	6.40894	6.85387	-0.444937	CHEMBL4734042	CHEMBL4734042	TRUE
Cc1nn(Cc2ccccc2F)c(C)c1CN(C)CC(O)COc1cccc2[nH]c3ccccc3c12	Cc1nn(Cc2ccccc2Cl)c(C)c1CN(C)CC(O)COc1cccc2[nH]c3ccccc3c12	4.46042	4.90483	-0.444409	CHEMBL4155233	CHEMBL4155233	TRUE
CN(CC=Cc1ccccc1F)Cc1coc2ccccc12	CN(CC=Cc1ccccc1Cl)Cc1coc2ccccc12	6	6.44394	-0.443939	CHEMBL4027654	CHEMBL4027654	TRUE
CC(SC1=NS(=O)(=O)c2cc(F)ccc2N1)c1ccccc1	CC(SC1=NS(=O)(=O)c2cc(Cl)ccc2N1)c1ccccc1	4.82391	5.26761	-0.443697	CHEMBL2330473	CHEMBL2330473	TRUE
CCC(CC)OC1C=C(C(=O)O)CC(NCc2ccccc2F)C1NC(C)=O	CCC(CC)OC1C=C(C(=O)O)CC(NCc2ccccc2Cl)C1NC(C)=O	5.56543	6.00877	-0.443343	CHEMBL3390211	CHEMBL3390211	TRUE
Nc1ccccc1NC(=O)c1ccc(NC(=O)CN2C(=O)C3(OCCO3)c3cc(F)ccc32)cc1	Nc1ccccc1NC(=O)c1ccc(NC(=O)CN2C(=O)C3(OCCO3)c3cc(Cl)ccc32)cc1	5.22185	5.66354	-0.441692	CHEMBL4035693	CHEMBL4035693	TRUE
CCCS(=O)(=O)Nc1ccc(F)c(-c2cc3cnc4[nH]nc(C5CC5)c4c3cc2OC)c1F	CCCS(=O)(=O)Nc1ccc(F)c(-c2cc3cnc4[nH]nc(C5CC5)c4c3cc2OC)c1Cl	6.65758	7.09691	-0.439333	CHEMBL3755449	CHEMBL3755449	TRUE
CCC(=O)c1cc(-c2ccc(F)cc2)n(-c2ccc(S(N)(=O)=O)cc2)c1	CCC(=O)c1cc(-c2ccc(Cl)cc2)n(-c2ccc(S(N)(=O)=O)cc2)c1	5.95861	6.39794	-0.439333	CHEMBL4737248	CHEMBL4737248	TRUE
CN1CCN(c2ccc(Nc3ncc(F)c(Nc4cccc(C(F)(F)F)c4)n3)nc2)CC1	CN1CCN(c2ccc(Nc3ncc(Cl)c(Nc4cccc(C(F)(F)F)c4)n3)nc2)CC1	7.17522	7.61439	-0.43917	CHEMBL4829860	CHEMBL4829860	TRUE
O=C(O)C1CCc2c([nH]c3ccc(F)cc23)C1	O=C(O)C1CCc2c([nH]c3ccc(Cl)cc23)C1	3.08778	3.52433	-0.436551	CHEMBL3579723	CHEMBL3579723	TRUE
CCCCC1CN(c2cccc(OC(F)(F)F)c2)C(=O)CN1Cc1cncn1Cc1ccc(F)cc1	CCCCC1CN(c2cccc(OC(F)(F)F)c2)C(=O)CN1Cc1cncn1Cc1ccc(Cl)cc1	6.14874	6.58503	-0.436285	CHEMBL5112502	CHEMBL5112502	TRUE
C=CC(=O)Nc1cccc(Nc2nc(Nc3ccc(Cn4ccnc4)cc3)ncc2F)c1	C=CC(=O)Nc1cccc(Nc2nc(Nc3ccc(Cn4ccnc4)cc3)ncc2Cl)c1	8.04576	8.48149	-0.435729	CHEMBL3861200	CHEMBL3861200	TRUE
O=C(Nc1ccc(Cl)cc1)Nc1ccc(N=C2C(=O)Nc3ccc(F)cc32)cc1	O=C(Nc1ccc(Cl)cc1)Nc1ccc(N=C2C(=O)Nc3ccc(Cl)cc32)cc1	5.71444	6.14874	-0.434299	CHEMBL3590864	CHEMBL3590864	TRUE
Fc1cccc(-c2nnc(C=Cc3ccc(Br)s3)o2)c1	Clc1cccc(-c2nnc(C=Cc3ccc(Br)s3)o2)c1	4.78781	5.22185	-0.434036	CHEMBL3768180	CHEMBL3768180	TRUE
CC(NS(=O)(=O)c1ccc(-c2c(C#N)c3cc(F)cnc3n2C2CCC2)nc1)C(F)(F)F	CC(NS(=O)(=O)c1ccc(-c2c(C#N)c3cc(Cl)cnc3n2C2CCC2)nc1)C(F)(F)F	7.33724	7.76955	-0.432309	CHEMBL3396886	CHEMBL3396886	TRUE
NC(=O)C(c1ccccc1)N(Cc1cccc(F)c1)C(=O)c1ccccc1	NC(=O)C(c1ccccc1)N(Cc1cccc(Cl)c1)C(=O)c1ccccc1	5.09151	5.52288	-0.431364	CHEMBL3874851	CHEMBL3874851	TRUE
Cc1c(OCCCCOc2ccc(C(=O)O)cc2F)ccc(C(=O)CC2CCCC2)c1O	Cc1c(OCCCCOc2ccc(C(=O)O)cc2Cl)ccc(C(=O)CC2CCCC2)c1O	6.1945	6.62525	-0.430753	CHEMBL3293516	CHEMBL3293516	TRUE
Cc1cc(N2CCC(NC(=O)Nc3ccc(F)cc3)CC2)c2ccccc2n1	Cc1cc(N2CCC(NC(=O)Nc3ccc(Cl)cc3)CC2)c2ccccc2n1	4.45742	4.88807	-0.430642	CHEMBL3405734	CHEMBL3405734	TRUE
Cc1cc(N2CCC(NC(=O)Nc3ccc(F)cc3)CC2)c2ccccc2n1	Cc1cc(N2CCC(NC(=O)Nc3ccc(Cl)cc3)CC2)c2ccccc2n1	4.45742	4.88807	-0.430642	CHEMBL3405734	CHEMBL3405734	TRUE
CCCS(=O)(=O)Nc1ccc(F)c(C(=O)Nc2cnc3[nH]ccc3c2)c1F	CCCS(=O)(=O)Nc1ccc(Cl)c(C(=O)Nc2cnc3[nH]ccc3c2)c1F	7.76955	8.19997	-0.43042	CHEMBL4262904	CHEMBL4262904	TRUE
O=C(c1ccc(Cl)c([N+](=O)[O-])c1)N1CCN(c2ccccc2F)CC1	O=C(c1ccc(Cl)c([N+](=O)[O-])c1)N1CCN(c2ccccc2Cl)CC1	5.10023	5.53062	-0.430386	CHEMBL4705347	CHEMBL4705347	TRUE
O=C(Nc1cccc(C(F)(F)F)c1-c1ncccc1F)c1cccc(-c2ncccc2C(F)(F)F)c1	O=C(Nc1cccc(C(F)(F)F)c1-c1ncccc1Cl)c1cccc(-c2ncccc2C(F)(F)F)c1	7.36653	7.79588	-0.429348	CHEMBL4056898	CHEMBL4056898	TRUE
COc1ccc(F)c(CC2CCN(CCc3ccccc3)CC2)c1	COc1ccc(Cl)c(CC2CCN(CCc3ccccc3)CC2)c1	6.56225	6.9914	-0.42915	CHEMBL3871875	CHEMBL3871875	TRUE
CCCS(=O)(=O)Nc1ccc(F)c(Nc2ccc3ncncc3c2)c1F	CCCS(=O)(=O)Nc1ccc(F)c(Nc2ccc3ncncc3c2)c1Cl	6.92812	7.35655	-0.428429	CHEMBL3240202	CHEMBL3240202	TRUE
O=S(=O)(C=Cc1ccccc1F)c1ccc(OCCCN2CCOCC2)cc1	O=S(=O)(C=Cc1ccccc1Cl)c1ccc(OCCCN2CCOCC2)cc1	5.06253	5.4908	-0.428265	CHEMBL4331808	CHEMBL4331808	TRUE
CC(N1CN(C2c3cc(F)ccc3CSc3ccccc32)n2ccc(=O)c(O)c2C1=O)C(F)(F)F	CC(N1CN(C2c3cc(Cl)ccc3CSc3ccccc32)n2ccc(=O)c(O)c2C1=O)C(F)(F)F	7.3536	7.77989	-0.426296	CHEMBL4702192	CHEMBL4702192	TRUE
O=C(NC1CC(c2ccc(F)cc2)Oc2ccccc21)C1(c2ccc3c(c2)OC(F)(F)O3)CC1	O=C(NC1CC(c2ccc(Cl)cc2)Oc2ccccc21)C1(c2ccc3c(c2)OC(F)(F)O3)CC1	5.60206	6.02687	-0.424812	CHEMBL4022894	CHEMBL4022894	TRUE
COc1cc2ncnc(Nc3ccc(F)cc3)c2cc1OCCCCCCC(=O)NO	COc1cc2ncnc(Nc3ccc(Cl)cc3)c2cc1OCCCCCCC(=O)NO	8.07058	8.49485	-0.424269	CHEMBL3762764	CHEMBL3762764	TRUE
Cc1cc(Nc2nc(NCc3cccc(F)c3)nc3[nH]ncc23)n[nH]1	Cc1cc(Nc2nc(NCc3cccc(Cl)c3)nc3[nH]ncc23)n[nH]1	7.83565	8.25964	-0.42399	CHEMBL5115458	CHEMBL5115458	TRUE
O=C(Nc1ccc(N=C2C(=O)Nc3ccc(F)cc32)cc1)Nc1cccc(Cl)c1	O=C(Nc1ccc(N=C2C(=O)Nc3ccc(Cl)cc32)cc1)Nc1cccc(Cl)c1	5.70115	6.12494	-0.423792	CHEMBL3590864	CHEMBL3590864	TRUE
O=C(Nc1cc(F)ccc1C(=O)O)c1ccc(-c2ccccc2)cc1	O=C(Nc1cc(Cl)ccc1C(=O)O)c1ccc(-c2ccccc2)cc1	4.00877	4.4318	-0.423024	CHEMBL2446350	CHEMBL2446350	TRUE
O=c1[nH]c(=O)n(C(=NO)c2ccc(F)cc2)cc1I	O=c1[nH]c(=O)n(C(=NO)c2ccc(Cl)cc2)cc1I	4.38405	4.80688	-0.422825	CHEMBL4253665	CHEMBL4253665	TRUE
Fc1ccc(Sc2nc(Cl)nc(Nc3ccc(OC(F)(F)F)cc3)n2)cc1	FC(F)(F)Oc1ccc(Nc2nc(Cl)nc(Sc3ccc(Cl)cc3)n2)cc1	5.34679	5.76955	-0.422764	CHEMBL4827883	CHEMBL4827883	TRUE
CC(NC(=O)c1ccc(F)cc1)c1ccc2c(n1)CCCN2C(=O)c1cccc(Cl)c1	CC(NC(=O)c1ccc(Cl)cc1)c1ccc2c(n1)CCCN2C(=O)c1cccc(Cl)c1	4.63827	5.06048	-0.422209	CHEMBL4689681	CHEMBL4689681	TRUE
Nc1ncnc2c1sc1ncc(-c3ccc(Cl)cc3F)cc12	Nc1ncnc2c1sc1ncc(-c3ccc(Cl)cc3Cl)cc12	5.85387	6.27572	-0.421852	CHEMBL3412950	CHEMBL3412950	TRUE
Cc1cc(C)c(Nc2ccc(F)c(Cl)c2)c(C)c1	Cc1cc(C)c(Nc2ccc(Cl)c(Cl)c2)c(C)c1	5.5376	5.95861	-0.421005	CHEMBL3810792	CHEMBL3810792	TRUE
Cc1cc(C)c(Nc2ccc(F)c(F)c2)c(C)c1	Cc1cc(C)c(Nc2ccc(Cl)c(F)c2)c(C)c1	5.06048	5.48149	-0.421005	CHEMBL3810792	CHEMBL3810792	TRUE
O=C(Nc1cc(C(F)(F)F)cc(C(F)(F)F)c1)c1cc(F)ccc1O	O=C(Nc1cc(C(F)(F)F)cc(C(F)(F)F)c1)c1cc(Cl)ccc1O	4.5376	4.95861	-0.421005	CHEMBL2343323	CHEMBL2343323	TRUE
O=c1[nH]c(=S)[nH]c2nc(Cc3ccc(F)cc3)nn12	O=c1[nH]c(=S)[nH]c2nc(Cc3ccc(Cl)cc3)nn12	4.64917	5.06854	-0.419371	CHEMBL2423138	CHEMBL2423138	TRUE
C#CCSc1nc(Cl)c(C#N)c(-c2ccc(F)cc2)n1	C#CCSc1nc(Cl)c(C#N)c(-c2ccc(Cl)cc2)n1	4.66115	5.07935	-0.41821	CHEMBL3420662	CHEMBL3420662	TRUE
C#CCSc1nc(Cl)c(C#N)c(-c2ccc(F)cc2)n1	C#CCSc1nc(Cl)c(C#N)c(-c2ccc(Cl)cc2)n1	4.661	5.079	-0.418	CHEMBL4036634	CHEMBL4036634	TRUE
Fc1ccc(-c2c[nH]c(C3Cc4c([nH]c5ccccc45)C(C4CCOCC4)N3)n2)cc1	Clc1ccc(-c2c[nH]c(C3Cc4c([nH]c5ccccc45)C(C4CCOCC4)N3)n2)cc1	6.42366	6.84164	-0.417979	CHEMBL3779605	CHEMBL3779605	TRUE
O=C1Nc2ccccc2C1=Cc1cc[n+](Cc2cccc(F)c2)cc1	O=C1Nc2ccccc2C1=Cc1cc[n+](Cc2cccc(Cl)c2)cc1	7.89279	8.3098	-0.417014	CHEMBL3365679	CHEMBL3365679	TRUE
COc1cc(F)c2nc(-c3cc(C)cc4c(=O)n(C)c(C)nc34)sc2c1	COc1cc(Cl)c2nc(-c3cc(C)cc4c(=O)n(C)c(C)nc34)sc2c1	5.2636	5.67985	-0.41625	CHEMBL4843847	CHEMBL4843847	TRUE
Oc1ccc(-c2n[nH]cc2-c2ccccc2F)c(O)c1O	Oc1ccc(-c2n[nH]cc2-c2ccccc2Cl)c(O)c1O	4.40561	4.82102	-0.415416	CHEMBL4268347	CHEMBL4268347	TRUE
CC(C(=O)NCc1ccc(C(F)(F)F)nc1-c1cccc(F)c1)c1ccc(NS(C)(=O)=O)c(F)c1	CC(C(=O)NCc1ccc(C(F)(F)F)nc1-c1cccc(Cl)c1)c1ccc(NS(C)(=O)=O)c(F)c1	8.88606	9.30103	-0.414973	CHEMBL3361606	CHEMBL3361606	TRUE
O=C(NNC(=O)c1csc(-c2cccc(F)c2)n1)c1ccccn1	O=C(NNC(=O)c1csc(-c2cccc(Cl)c2)n1)c1ccccn1	5.58503	6	-0.414973	CHEMBL4195474	CHEMBL4195474	TRUE
O=C(COc1cccc(F)c1)NO	O=C(COc1cccc(Cl)c1)NO	4.56864	4.98297	-0.41433	CHEMBL4233573	CHEMBL4233573	TRUE
COc1cc2c(cc1OC)CN(C(=O)c1ccc(-c3ccc(F)cc3)o1)CC2	COc1cc2c(cc1OC)CN(C(=O)c1ccc(-c3ccc(Cl)cc3)o1)CC2	5.0716	5.48545	-0.413848	CHEMBL4153366	CHEMBL4153366	TRUE
NC1CCN(C(=O)CO/N=C2C(=C3/C(=O)Nc4ccc(F)cc43)/Nc3ccccc3/2)CC1	NC1CCN(C(=O)CO/N=C2C(=C3/C(=O)Nc4ccc(Cl)cc43)/Nc3ccccc3/2)CC1	8.46218	8.8729	-0.410714	CHEMBL5123485	CHEMBL5123485	TRUE
CNc1ncc(C(=O)OCc2ccc(F)cc2)c2nc(-c3ccco3)nn12	CNc1ncc(C(=O)OCc2ccc(Cl)cc2)c2nc(-c3ccco3)nn12	6.25493	6.66555	-0.410621	CHEMBL4275270	CHEMBL4275270	TRUE
COC(=O)c1ccc(C2C(C(=O)c3cccnc3)=C(O)C(=O)N2CCc2c[nH]c3c(F)cccc23)cc1	COC(=O)c1ccc(C2C(C(=O)c3cccnc3)=C(O)C(=O)N2CCc2c[nH]c3c(Cl)cccc23)cc1	4.74473	5.1549	-0.410174	CHEMBL3241939	CHEMBL3241939	TRUE
Fc1cccc(CSc2ncnc3[nH]cnc23)c1	Clc1cccc(CSc2ncnc3[nH]cnc23)c1	6.4437	6.85387	-0.410174	CHEMBL4734042	CHEMBL4734042	TRUE
Fc1cc(F)cc(Cc2sc(NCc3ccc4c(c3)CCO4)nc2-c2ccccc2F)c1	Fc1cc(F)cc(Cc2sc(NCc3ccc4c(c3)CCO4)nc2-c2ccccc2Cl)c1	7.19382	7.60206	-0.40824	CHEMBL3875251	CHEMBL3875251	TRUE
N=C(N)Nc1ccc(F)cc1	N=C(N)Nc1ccc(Cl)cc1	4.31605	4.72354	-0.407485	CHEMBL4046326	CHEMBL4046326	TRUE
CCOc1nc(NC(=O)C(C)(C)NC(=O)c2ccc3c(C4CCCC4)c(-c4ccc(F)cn4)n(C)c3c2)ccc1C=CC(=O)O	CCOc1nc(NC(=O)C(C)(C)NC(=O)c2ccc3c(C4CCCC4)c(-c4ccc(Cl)cn4)n(C)c3c2)ccc1C=CC(=O)O	7.63827	8.04576	-0.407485	CHEMBL3412639	CHEMBL3412639	TRUE
Cc1cc(C#N)cc(C)c1Oc1ccnc(S(=O)(=O)CC(=O)Nc2ccc(F)cc2)n1	Cc1cc(C#N)cc(C)c1Oc1ccnc(S(=O)(=O)CC(=O)Nc2ccc(Cl)cc2)n1	5.73518	6.14267	-0.407485	CHEMBL3626463	CHEMBL3626463	TRUE
CCOc1cc(=O)n(C)cc1-c1cc(NS(=O)(=O)CC)ccc1Oc1ccc(F)cc1	CCOc1cc(=O)n(C)cc1-c1cc(NS(=O)(=O)CC)ccc1Oc1ccc(Cl)cc1	7.16115	7.56864	-0.407485	CHEMBL4051111	CHEMBL4051111	TRUE
Fc1ccccc1C[n+]1cccc(Cn2c3c(c4ccccc42)CCCC3)c1	Clc1ccccc1C[n+]1cccc(Cn2c3c(c4ccccc42)CCCC3)c1	6.29243	6.69897	-0.40654	CHEMBL4155445	CHEMBL4155445	TRUE
O=C(O)c1ccc(N(Cc2ccc(C3CCCCC3)cc2)C(=O)CN(Cc2ccccc2F)S(=O)(=O)c2c(F)c(F)c(F)c(F)c2F)cc1O	O=C(O)c1ccc(N(Cc2ccc(C3CCCCC3)cc2)C(=O)CN(Cc2ccccc2Cl)S(=O)(=O)c2c(F)c(F)c(F)c(F)c2F)cc1O	4.55284	4.95861	-0.405765	CHEMBL2434703	CHEMBL2434703	TRUE
O=C(Nc1cnccc1Cl)N1CCN(Cc2cccc(Oc3ccc(F)cc3)c2)CC1	O=C(Nc1cnccc1Cl)N1CCN(Cc2cccc(Oc3ccc(Cl)cc3)c2)CC1	8.48149	8.88606	-0.404571	CHEMBL3812745	CHEMBL3812745	TRUE
CC1C(F)CC(C(=O)NCc2cc(-c3cnc(C(F)(F)F)nc3)c(F)cn2)N1S(=O)(=O)c1ccc(F)cc1	CC1C(F)CC(C(=O)NCc2cc(-c3cnc(C(F)(F)F)nc3)c(Cl)cn2)N1S(=O)(=O)c1ccc(F)cc1	7.48149	7.88606	-0.404571	CHEMBL4049011	CHEMBL4049011	TRUE
Cn1cc(C2=C(c3nnc4ccccn34)C(=O)NC2=O)c2cc(F)ccc21	Cn1cc(C2=C(c3nnc4ccccn34)C(=O)NC2=O)c2cc(Cl)ccc21	6.72584	7.13018	-0.40434	CHEMBL3398953	CHEMBL3398953	TRUE
Cn1cc(C2=C(c3nnc4ccccn34)C(=O)NC2=O)c2cc(F)ccc21	Cn1cc(C2=C(c3nnc4ccccn34)C(=O)NC2=O)c2cc(Cl)ccc21	6.72584	7.13018	-0.40434	CHEMBL3398953	CHEMBL3398953	TRUE
CC(NC(=O)NCc1nc2cccnc2n1Cc1ccc(F)cc1)c1ccc(F)cc1	CC(NC(=O)NCc1nc2cccnc2n1Cc1ccc(F)cc1)c1ccc(Cl)cc1	5.97881	6.383	-0.404189	CHEMBL3865063	CHEMBL3865063	TRUE
Cc1cc(C)nc(NC(=S)N2CCN(Cc3ccc(F)cc3)CC2)c1	Cc1cc(C)nc(NC(=S)N2CCN(Cc3ccc(Cl)cc3)CC2)c1	4.42022	4.82391	-0.403692	CHEMBL4121210	CHEMBL4121210	TRUE
Fc1ccc(COC2CCN(Cc3cn4ccccc4n3)CC2)cc1F	Fc1cc(COC2CCN(Cc3cn4ccccc4n3)CC2)ccc1Cl	6.47001	6.87322	-0.403214	CHEMBL5145660	CHEMBL5145660	TRUE
CCOC(=O)c1c(C)nc(N2CCN(S(=O)(=O)c3ccc(N)c(F)c3)CC2)nc1-c1ccccc1	CCOC(=O)c1c(C)nc(N2CCN(S(=O)(=O)c3ccc(N)c(Cl)c3)CC2)nc1-c1ccccc1	6.69897	7.10171	-0.402744	CHEMBL4738011	CHEMBL4738011	TRUE
N#Cc1c(Cn2c(=O)n(CC3CCC(C(=O)O)CC3)c(=O)c3c(F)cccc32)cccc1C(F)(F)F	N#Cc1c(Cn2c(=O)n(CC3CCC(C(=O)O)CC3)c(=O)c3c(Cl)cccc32)cccc1C(F)(F)F	7.40012	7.80134	-0.401226	CHEMBL4715531	CHEMBL4715531	TRUE
O=C(Nc1ccc(F)cc1)c1coc2ccccc2c1=O	O=C(Nc1ccc(Cl)cc1)c1coc2ccccc2c1=O	8.13668	8.5376	-0.400925	CHEMBL4478104	CHEMBL4478104	TRUE
Nc1ccc(Oc2ccc(NC(=O)Nc3ccc(F)c(C(F)(F)F)c3)cc2)cn1	Nc1ccc(Oc2ccc(NC(=O)Nc3ccc(Cl)c(C(F)(F)F)c3)cc2)cn1	6.89076	7.29158	-0.40082	CHEMBL5106814	CHEMBL5106814	TRUE
O=C1CC2CCC(C1)N2CCc1ccc(F)cc1	O=C1CC2CCC(C1)N2CCc1ccc(Cl)cc1	5.6	6	-0.400001	CHEMBL4391033	CHEMBL4391033	TRUE
O=C(Nc1cccnc1)c1cc(F)ccc1OCc1ccccc1	O=C(Nc1cccnc1)c1cc(Cl)ccc1OCc1ccccc1	7.40001	7.79997	-0.399963	CHEMBL4058537	CHEMBL4058537	TRUE
O=C(Nc1cccc(F)c1)c1cc(C(F)(F)F)ccc1OCc1ccc(F)cc1	O=C(Nc1cccc(Cl)c1)c1cc(C(F)(F)F)ccc1OCc1ccc(F)cc1	7.50004	7.89997	-0.399936	CHEMBL4372253	CHEMBL4372253	TRUE
Cc1nc(Oc2ccc(C(=O)O)cc2)ccc1CN1CCC(N2C(=O)N(C3CCOCC3)CC2c2cccc(F)c2)CC1	Cc1nc(Oc2ccc(C(=O)O)cc2)ccc1CN1CCC(N2C(=O)N(C3CCOCC3)CC2c2cccc(Cl)c2)CC1	8.82391	9.22185	-0.39794	CHEMBL2439744	CHEMBL2439744	TRUE
CC(C)(C)c1cc(NC(=O)Nc2ccc(Oc3ncnc4[nH]ncc34)c(F)c2)no1	CC(C)(C)c1cc(NC(=O)Nc2ccc(Oc3ncnc4[nH]ncc34)c(Cl)c2)no1	8.30103	8.69897	-0.39794	CHEMBL4429476	CHEMBL4429476	TRUE
CCn1cc(C(=NNc2nc(-c3ccc(F)cc3)c(C#N)s2)C(F)(F)F)c2cc(-c3nc(CN4CCN(C)CC4)cs3)ccc21	CCn1cc(C(=NNc2nc(-c3ccc(Cl)cc3)c(C#N)s2)C(F)(F)F)c2cc(-c3nc(CN4CCN(C)CC4)cs3)ccc21	5.51999	5.91721	-0.397222	CHEMBL4771183	CHEMBL4771183	TRUE
COC(=O)N1CCN(C(=O)Cc2ccc(F)c(F)c2)C2C(N3CCC(O)C3)CCCC21	COC(=O)N1CCN(C(=O)Cc2ccc(Cl)c(F)c2)C2C(N3CCC(O)C3)CCCC21	6.20551	6.60206	-0.396548	CHEMBL4009144	CHEMBL4009144	TRUE
O=C(N/N=C/c1cccc(F)c1)c1ccc(CN2CCC(CO)CC2)cc1	O=C(N/N=C/c1cccc(Cl)c1)c1ccc(CN2CCC(CO)CC2)cc1	5.08619	5.48149	-0.3953	CHEMBL5109574	CHEMBL5109574	TRUE
Fc1ccccc1COc1cccc2onc(Nc3cccnc3)c12	Clc1ccccc1COc1cccc2onc(Nc3cccnc3)c12	6.17393	6.56864	-0.394711	CHEMBL4200192	CHEMBL4200192	TRUE
O=C(c1ccc(F)cc1O)N1CCC2(CCC2)C1	O=C(c1ccc(Cl)cc1O)N1CCC2(CCC2)C1	5	5.39362	-0.393619	CHEMBL4360952	CHEMBL4360952	TRUE
CC(C)C(Nc1ncnc2nc[nH]c12)c1nc2cccc(F)c2c(=O)n1-c1ccccc1	CC(C)C(Nc1ncnc2nc[nH]c12)c1nc2cccc(Cl)c2c(=O)n1-c1ccccc1	6.05651	6.44855	-0.392045	CHEMBL4836858	CHEMBL4836858	TRUE
COC(=O)C(c1ccc(F)cc1Cl)n1ccc2c(F)cccc21	COC(=O)C(c1ccc(F)cc1Cl)n1ccc2c(Cl)cccc21	5.63639	6.02687	-0.390484	CHEMBL4717253	CHEMBL4717253	TRUE
O=C(NN=Cc1ccc(F)cc1)c1nc2ccccc2[nH]1	O=C(NN=Cc1ccc(Cl)cc1)c1nc2ccccc2[nH]1	4.74715	5.13668	-0.38953	CHEMBL4618028	CHEMBL4618028	TRUE
O=C1c2ccc(F)cc2CC1CCN1CCCN(c2ccc(Cl)cc2)CC1	O=C1c2ccc(Cl)cc2CC1CCN1CCCN(c2ccc(Cl)cc2)CC1	7.20066	7.59007	-0.389407	CHEMBL4392610	CHEMBL4392610	TRUE
CC(=O)n1cc(C(=O)Nc2cc(C(=O)O)cc(-c3cccc(F)c3)c2)c2ccccc21	CC(=O)n1cc(C(=O)Nc2cc(C(=O)O)cc(-c3cccc(Cl)c3)c2)c2ccccc21	5.45346	5.84164	-0.38818	CHEMBL4148665	CHEMBL4148665	TRUE
O=C(Nc1cc(F)cc(C(F)(F)F)c1)N1CCC(O)(c2ccc(F)cc2)CC1	O=C(Nc1cc(F)cc(C(F)(F)F)c1)N1CCC(O)(c2ccc(Cl)cc2)CC1	5.02228	5.40894	-0.386659	CHEMBL3619044	CHEMBL3619044	TRUE
O=C(NN=Cc1cc([N+](=O)[O-])ccc1F)c1ccc2c(c1)OCCCO2	O=C(NN=Cc1cc([N+](=O)[O-])ccc1Cl)c1ccc2c(c1)OCCCO2	5.02228	5.40894	-0.386659	CHEMBL3994743	CHEMBL3994743	TRUE
O=C(O)C=Cc1ccc(Cc2c(-c3ccc(F)cc3)c(=O)oc3cc(O)ccc23)cc1	O=C(O)C=Cc1ccc(Cc2c(-c3ccc(Cl)cc3)c(=O)oc3cc(O)ccc23)cc1	8.04576	8.4318	-0.386041	CHEMBL3429910	CHEMBL3429910	TRUE
O=C(O)C1CCCN(CCNN=Cc2ccccc2-c2ccc(F)cc2F)C1	O=C(O)C1CCCN(CCNN=Cc2ccccc2-c2ccc(F)cc2Cl)C1	7.44904	7.83505	-0.386014	CHEMBL2317559	CHEMBL2317559	TRUE
CC(O)(COc1ccccc1F)C(=O)N1CCc2c(C#N)cccc21	CC(O)(COc1ccccc1Cl)C(=O)N1CCc2c(C#N)cccc21	7.82974	8.21467	-0.384932	CHEMBL3243252	CHEMBL3243252	TRUE
N#Cc1c(N2CCOCC2)sc(-c2nc[nH]n2)c1-c1ccc(NC(=O)Nc2ccccc2F)cc1	N#Cc1c(N2CCOCC2)sc(-c2nc[nH]n2)c1-c1ccc(NC(=O)Nc2ccccc2Cl)cc1	7.6517	8.03621	-0.384517	CHEMBL4769544	CHEMBL4769544	TRUE
COc1ccc(F)cc1OC1CN(S(=O)(=O)c2ccc3c(c2)OCO3)C1	COc1ccc(Cl)cc1OC1CN(S(=O)(=O)c2ccc3c(c2)OCO3)C1	5.91721	6.30103	-0.383815	CHEMBL4251999	CHEMBL4251999	TRUE
C=CC1CC1(NC(=O)C1CC(Oc2nccc3cc(F)ccc23)CN1C(=O)C(NC(=O)OC(C)(C)C)C(C)(C)C)C(=O)NS(=O)(=O)C1CC1	C=CC1CC1(NC(=O)C1CC(Oc2nccc3cc(Cl)ccc23)CN1C(=O)C(NC(=O)OC(C)(C)C)C(C)(C)C)C(=O)NS(=O)(=O)C1CC1	7.06048	7.4437	-0.383217	CHEMBL3128635	CHEMBL3128635	TRUE
CC(Cn1ncc2c(Nc3cccc(F)c3)nc(SCCN3CCOCC3)nc21)c1ccccc1	CC(Cn1ncc2c(Nc3cccc(Cl)c3)nc(SCCN3CCOCC3)nc21)c1ccccc1	5.63078	6.01323	-0.382444	CHEMBL3395759	CHEMBL3395759	TRUE
Cc1cc(OCc2nnc(SC3CCCC3)n2-c2cccnc2)ccc1F	Cc1cc(OCc2nnc(SC3CCCC3)n2-c2cccnc2)ccc1Cl	6.3536	6.73518	-0.381586	CHEMBL2317274	CHEMBL2317274	TRUE
CC1CC=C(C(=O)O)C(C)(c2ccc(F)cc2)C1	CC1CC=C(C(=O)O)C(C)(c2ccc(Cl)cc2)C1	5.7734	6.1549	-0.381502	CHEMBL3758041	CHEMBL3758041	TRUE
O=S(=O)(C=Cc1cccnc1)c1ccccc1F	O=S(=O)(C=Cc1cccnc1)c1ccccc1Cl	5.16399	5.54546	-0.381467	CHEMBL4712767	CHEMBL4712767	TRUE
CCCCCCCCS(=O)(=O)Nc1ccc(-c2ccccc2F)cc1C(=O)O	CCCCCCCCS(=O)(=O)Nc1ccc(-c2ccccc2Cl)cc1C(=O)O	4.46092	4.84164	-0.380714	CHEMBL3583672	CHEMBL3583672	TRUE
O=C(O)CN1C(=O)C(=Cc2ccc(-c3ccccc3F)o2)SC1=S	O=C(O)CN1C(=O)C(=Cc2ccc(-c3ccccc3Cl)o2)SC1=S	5.52288	5.90309	-0.380211	CHEMBL2352238	CHEMBL2352238	TRUE
O=c1c2c(F)cccc2nc(CSc2ncnc3[nH]cnc23)n1-c1ccccc1Cl	O=c1c2c(Cl)cccc2nc(CSc2ncnc3[nH]cnc23)n1-c1ccccc1Cl	4.88372	5.2636	-0.379879	CHEMBL3366680	CHEMBL3366680	TRUE
O=c1c(C=Nc2cc(F)ccc2O)coc2ccccc12	O=c1c(C=Nc2cc(Cl)ccc2O)coc2ccccc12	5.33255	5.7122	-0.379651	CHEMBL4055293	CHEMBL4055293	TRUE
O=C([O-])CCN(Cc1ccc(C(=O)[O-])c(C(=O)[O-])c1)Cc1ccc(C(=O)[O-])cc1F	O=C([O-])CCN(Cc1ccc(C(=O)[O-])c(C(=O)[O-])c1)Cc1ccc(C(=O)[O-])cc1Cl	5.39147	5.76955	-0.378077	CHEMBL3876663	CHEMBL3876663	TRUE
CN1CCN(c2cc(Nc3ncc(F)c(Nc4cccc(CO)c4)n3)cc(S(C)(=O)=O)c2)CC1	CN1CCN(c2cc(Nc3ncc(Cl)c(Nc4cccc(CO)c4)n3)cc(S(C)(=O)=O)c2)CC1	4.52288	4.89963	-0.376751	CHEMBL4145185	CHEMBL4145185	TRUE
CNC(=O)c1c(-c2ccc(F)cc2)oc2ccc(-c3cc(C(=O)NC4(c5ccccc5)CC4)ccc3F)cc12	CNC(=O)c1c(-c2ccc(F)cc2)oc2ccc(-c3cc(C(=O)NC4(c5ccccc5)CC4)ccc3Cl)cc12	6.82391	7.20066	-0.376751	CHEMBL4015579	CHEMBL4015579	TRUE
O=c1cc2n(cc1O)CCN(Cc1c(F)cccc1F)C2	O=c1cc2n(cc1O)CCN(Cc1c(F)cccc1Cl)C2	7.42022	7.79588	-0.375664	CHEMBL4411225	CHEMBL4411225	TRUE
O=c1[nH]c(-c2cccc(OCc3ccc(F)cc3)c2)nc2ccccc12	O=c1[nH]c(-c2cccc(OCc3ccc(Cl)cc3)c2)nc2ccccc12	4.72125	5.09691	-0.375664	CHEMBL4036414	CHEMBL4036414	TRUE
COc1nc(C2=NOCC(c3ccc(F)c(C(F)(F)F)c3)N2)ccc1-n1cnc(C)c1	COc1nc(C2=NOCC(c3ccc(Cl)c(C(F)(F)F)c3)N2)ccc1-n1cnc(C)c1	7.72125	8.09691	-0.375664	CHEMBL4839804	CHEMBL4839804	TRUE
O=C(NNS(=O)(=O)c1ccccc1)c1cccc(-c2ccc(F)cc2)c1	O=C(NNS(=O)(=O)c1ccccc1)c1cccc(-c2ccc(Cl)cc2)c1	5.02228	5.39794	-0.375664	CHEMBL4374936	CHEMBL4374936	TRUE
O=C1Nc2ccc(C(=O)NC(CO)c3ccccc3)cc2C1=C(c1ccc(F)cc1)c1ncc[nH]1	O=C1Nc2ccc(C(=O)NC(CO)c3ccccc3)cc2C1=C(c1ccc(Cl)cc1)c1ncc[nH]1	5	5.37551	-0.375512	CHEMBL4155717	CHEMBL4155717	TRUE
O=C1Nc2cc(NC(=O)c3c[nH]cc(-c4ccc(F)cc4)c3=O)ccc2C1=Cc1ccc[nH]1	O=C1Nc2cc(NC(=O)c3c[nH]cc(-c4ccc(Cl)cc4)c3=O)ccc2C1=Cc1ccc[nH]1	6.89415	7.26922	-0.375068	CHEMBL3362102	CHEMBL3362102	TRUE
Cn1ccc2nc(COc3ccc(-c4ccc(=O)[nH]c4-c4ccc(F)cc4)cc3)ccc21	Cn1ccc2nc(COc3ccc(-c4ccc(=O)[nH]c4-c4ccc(Cl)cc4)cc3)ccc21	8.76195	9.13668	-0.374723	CHEMBL3635514	CHEMBL3635514	TRUE
OB1OCc2ccc(C(O)c3cccc(F)c3)cc21	OB1OCc2ccc(C(O)c3cccc(Cl)c3)cc21	4.25104	4.62525	-0.374215	CHEMBL4677849	CHEMBL4677849	TRUE
Fc1ccc(-c2cccc3ncnn23)cc1	Clc1ccc(-c2cccc3ncnn23)cc1	5.88606	6.25964	-0.373581	CHEMBL4017304	CHEMBL4017304	TRUE
Fc1ccc(C[n+]2cccc(Cn3c4c(c5ccccc53)CCCC4)c2)cc1	Clc1ccc(C[n+]2cccc(Cn3c4c(c5ccccc53)CCCC4)c2)cc1	6.284	6.65758	-0.373581	CHEMBL4155445	CHEMBL4155445	TRUE
O=C(CC(O)c1ccc(F)cc1)NO	O=C(CC(O)c1ccc(Cl)cc1)NO	5.09637	5.4698	-0.373433	CHEMBL2428642	CHEMBL2428642	TRUE
Fc1ccc2c(CN3CCOC(COc4ccccc4)C3)c[nH]c2c1	Clc1ccc2c(CN3CCOC(COc4ccccc4)C3)c[nH]c2c1	7.72354	8.09691	-0.373372	CHEMBL3796307	CHEMBL3796307	TRUE
CCCCCCCCS(=O)(=O)Nc1cc(-c2cccc(F)c2)ccc1C(=O)O	CCCCCCCCS(=O)(=O)Nc1cc(-c2cccc(Cl)c2)ccc1C(=O)O	4.48678	4.86012	-0.373339	CHEMBL3583672	CHEMBL3583672	TRUE
O=C(O)CCCOc1ccccc1-c1cc(-c2ccccc2)n(-c2ccc(F)cc2)n1	O=C(O)CCCOc1ccccc1-c1cc(-c2ccccc2)n(-c2ccc(Cl)cc2)n1	4.9914	5.36452	-0.373116	CHEMBL2339128	CHEMBL2339128	TRUE
NS(=O)(=O)c1ccc(-n2nc(C(=O)NN=Cc3ccc(F)cc3)cc2-c2cccs2)cc1	NS(=O)(=O)c1ccc(-n2nc(C(=O)NN=Cc3ccc(Cl)cc3)cc2-c2cccs2)cc1	7.80134	8.17393	-0.372582	CHEMBL4817246	CHEMBL4817246	TRUE
O=C1OCc2ccc(OCCOc3ccc(F)cc3)cc21	O=C1OCc2ccc(OCCOc3ccc(Cl)cc3)cc21	6.4908	6.86328	-0.372482	CHEMBL2394316	CHEMBL2394316	TRUE
O=S(=O)(c1ccc(F)cc1)N1CCCc2ccc(Oc3cc(-c4nc(C5CC5)no4)cc(Cl)n3)cc21	O=S(=O)(c1ccc(Cl)cc1)N1CCCc2ccc(Oc3cc(-c4nc(C5CC5)no4)cc(Cl)n3)cc21	6.48149	6.85387	-0.372386	CHEMBL3118586	CHEMBL3118586	TRUE
O=C(Nc1ccncc1)c1c(F)cccc1F	O=C(Nc1ccncc1)c1c(F)cccc1Cl	6.26761	6.63827	-0.370666	CHEMBL2421816	CHEMBL2421816	TRUE
CS(=O)(=O)c1ccc(NC(=O)NNC(=S)Nc2ccc(F)cc2)cc1	CS(=O)(=O)c1ccc(NC(=O)NNC(=S)Nc2ccc(Cl)cc2)cc1	4.90344	5.27409	-0.370651	CHEMBL4153311	CHEMBL4153311	TRUE
O=S(=O)(C=Cc1ncccc1F)c1ccc(F)cc1	O=S(=O)(C=Cc1ncccc1Cl)c1ccc(F)cc1	6.266	6.63639	-0.370387	CHEMBL4712767	CHEMBL4712767	TRUE
O=C(Nc1ccc(F)c(F)c1)c1ccc2[nH]ncc2c1	O=C(Nc1ccc(F)c(Cl)c1)c1ccc2[nH]ncc2c1	8.7986	9.16813	-0.369527	CHEMBL3996824	CHEMBL3996824	TRUE
O=C(NC1CCNCC1)c1n[nH]cc1NC(=O)c1c(F)cccc1Cl	O=C(NC1CCNCC1)c1n[nH]cc1NC(=O)c1c(Cl)cccc1Cl	6.95861	7.3279	-0.369295	CHEMBL4151776	CHEMBL4151776	TRUE
Cn1c(COc2cccc(C(=O)O)c2)nc2ccc(Oc3cccc(F)c3)cc21	Cn1c(COc2cccc(C(=O)O)c2)nc2ccc(Oc3cccc(Cl)c3)cc21	6.6968	7.0655	-0.368698	CHEMBL4158091	CHEMBL4158091	TRUE
O=C(NC1CCN(C(c2ccncc2)c2cc3c(cc2O)OCO3)C1)c1ccccc1F	O=C(NC1CCN(C(c2ccncc2)c2cc3c(cc2O)OCO3)C1)c1ccccc1Cl	6.35952	6.72816	-0.36864	CHEMBL4832320	CHEMBL4832320	TRUE
CN1CCC(n2cc(-c3cnc(N4CCOC(Cn5nc(-c6ccc(F)c(F)c6)ccc5=O)C4)nc3)cn2)CC1	CN1CCC(n2cc(-c3cnc(N4CCOC(Cn5nc(-c6ccc(F)c(Cl)c6)ccc5=O)C4)nc3)cn2)CC1	7.67778	8.04576	-0.367977	CHEMBL3389844	CHEMBL3389844	TRUE
O=C(Nc1ccc(OC(F)(F)F)cc1)N1CCC2(CCN(C(=O)c3ccccc3F)CC2)C1	O=C(Nc1ccc(OC(F)(F)F)cc1)N1CCC2(CCN(C(=O)c3ccccc3Cl)CC2)C1	9.1549	9.52288	-0.367977	CHEMBL2437612	CHEMBL2437612	TRUE
CCOC(=O)C(=O)CC(=O)C=Cc1cccn1Cc1ccc(F)cc1	CCOC(=O)C(=O)CC(=O)C=Cc1cccn1Cc1ccc(Cl)cc1	4.00877	4.37675	-0.367977	CHEMBL3088597	CHEMBL3088597	TRUE
Cc1cc(CNc2nc(N)nc3ccn(Cc4ncccc4F)c23)no1	Cc1cc(CNc2nc(N)nc3ccn(Cc4ncccc4Cl)c23)no1	5.67778	6.04576	-0.367977	CHEMBL4030710	CHEMBL4030710	TRUE
COc1cc(OC)c(Cl)c(N2Cc3cnc(Nc4ccc(F)c(F)c4)nc3N(C3CCN(C(=O)C=CCN(C)C)CC3)C2=O)c1Cl	COc1cc(OC)c(Cl)c(N2Cc3cnc(Nc4ccc(F)c(Cl)c4)nc3N(C3CCN(C(=O)C=CCN(C)C)CC3)C2=O)c1Cl	8.33819	8.70553	-0.367346	CHEMBL4043777	CHEMBL4043777	TRUE
O=C(CN(Cc1ccc(F)cc1)Cc1cccc(C(=O)O)c1)NO	O=C(CN(Cc1ccc(Cl)cc1)Cc1cccc(C(=O)O)c1)NO	6.75203	7.11919	-0.36716	CHEMBL4189611	CHEMBL4189611	TRUE
Fc1ccc(-n2cc(NCCN3CCCCC3)nn2)cc1	Clc1ccc(-n2cc(NCCN3CCCCC3)nn2)cc1	6.84164	7.20761	-0.365971	CHEMBL3419512	CHEMBL3419512	TRUE
CN1CCN(CCCCCOc2cccc(N3C(=O)SC(=Cc4ccc(Oc5ccc(F)cc5)cc4)C3=O)c2)CC1	CN1CCN(CCCCCOc2cccc(N3C(=O)SC(=Cc4ccc(Oc5ccc(Cl)cc5)cc4)C3=O)c2)CC1	5.21753	5.58336	-0.365832	CHEMBL4683211	CHEMBL4683211	TRUE
COc1cc(-c2nnc3n2CCCC3(Oc2ccc(F)c(F)c2)C(C)(C)O)ccc1-c1cnc(C)o1	COc1cc(-c2nnc3n2CCCC3(Oc2ccc(F)c(Cl)c2)C(C)(C)O)ccc1-c1cnc(C)o1	7.05552	7.42022	-0.364699	CHEMBL3815584	CHEMBL3815584	TRUE
CS(=O)(=O)c1ccc(C(=Cc2cccc(F)c2)C(=O)O)cc1	CS(=O)(=O)c1ccc(C(=Cc2cccc(Cl)c2)C(=O)O)cc1	4.41005	4.77469	-0.36464	CHEMBL2345591	CHEMBL2345591	TRUE
O=C(c1ccccc1O)c1[nH]c(Cl)c(Cl)c1-n1c(C(=O)c2ccc(F)cc2O)cc(Cl)c1Cl	O=C(c1ccccc1O)c1[nH]c(Cl)c(Cl)c1-n1c(C(=O)c2ccc(Cl)cc2O)cc(Cl)c1Cl	4.67162	5.03621	-0.364592	CHEMBL3396870	CHEMBL3396870	TRUE
COc1cc(C=C2CCCN3C2=NOCCC3c2cc(F)cc(F)c2)ccc1-n1cnc(C)c1	COc1cc(C=C2CCCN3C2=NOCCC3c2cc(F)cc(Cl)c2)ccc1-n1cnc(C)c1	7.4318	7.79588	-0.364082	CHEMBL2318752	CHEMBL2318752	TRUE
O=S(=O)(c1ccccc1F)n1cc(C(F)F)c2cc(N3CCNCC3)ccc21	O=S(=O)(c1ccccc1Cl)n1cc(C(F)F)c2cc(N3CCNCC3)ccc21	7.52288	7.88606	-0.363178	CHEMBL5109505	CHEMBL5109505	TRUE
O=C(Nc1ccc(F)cc1)N1CCC[CH]1c1nc(-c2ccc(F)cc2)cs1	O=C(Nc1ccc(Cl)cc1)N1CCC[CH]1c1nc(-c2ccc(F)cc2)cs1	7.60977	7.97265	-0.362879	CHEMBL5161276	CHEMBL5161276	TRUE
C#CCN(C)CC(=C)c1ccc(F)c(C)c1	C#CCN(C)CC(=C)c1ccc(Cl)c(C)c1	6.63827	7	-0.361728	CHEMBL3418726	CHEMBL3418726	TRUE
COc1nc(C2=NOCC(c3ccc(Cl)c(F)c3)N2)ccc1-n1cnc(C)c1	COc1nc(C2=NOCC(c3ccc(Cl)c(Cl)c3)N2)ccc1-n1cnc(C)c1	7.63827	8	-0.361728	CHEMBL4839804	CHEMBL4839804	TRUE
COc1nc(C2=NOCC(c3ccc(F)c(Cl)c3)N2)ccc1-n1cnc(C)c1	COc1nc(C2=NOCC(c3ccc(Cl)c(Cl)c3)N2)ccc1-n1cnc(C)c1	7.63827	8	-0.361728	CHEMBL4839804	CHEMBL4839804	TRUE
CC(C)(C)c1cc(NC(=O)C2CCC(=O)N2c2ccc(F)cc2)on1	CC(C)(C)c1cc(NC(=O)C2CCC(=O)N2c2ccc(Cl)cc2)on1	7.85387	8.21467	-0.360798	CHEMBL3373564	CHEMBL3373564	TRUE
CC(C)Nc1ccc(-c2ccn3c(CC4CC4)nnc3c2C(F)(F)F)cc1F	CC(C)Nc1ccc(-c2ccn3c(CC4CC4)nnc3c2C(F)(F)F)cc1Cl	8.04998	8.41005	-0.360074	CHEMBL4040510	CHEMBL4040510	TRUE
CCOc1cc(=O)oc2cc(OCc3cccc(F)c3)ccc12	CCOc1cc(=O)oc2cc(OCc3cccc(Cl)c3)ccc12	6.57999	6.93998	-0.359988	CHEMBL3096735	CHEMBL3096735	TRUE
CN1CCN(c2nc(N)nc(Cc3cccc(F)c3)n2)CC1	CN1CCN(c2nc(N)nc(Cc3cccc(Cl)c3)n2)CC1	7.19382	7.55284	-0.359022	CHEMBL4035125	CHEMBL4035125	TRUE
O=C(Nc1nc2cc(-c3ccccc3)ccn2n1)c1cccc(F)c1	O=C(Nc1nc2cc(-c3ccccc3)ccn2n1)c1cccc(Cl)c1	4	4.35853	-0.358526	CHEMBL4372320	CHEMBL4372320	TRUE
O=C(O)CCNC(=O)c1ccc2c(c1)CCC2n1nc(-c2cc(Cl)cc(Cl)c2)cc1-c1ccc(F)cc1	O=C(O)CCNC(=O)c1ccc2c(c1)CCC2n1nc(-c2cc(Cl)cc(Cl)c2)cc1-c1ccc(Cl)cc1	5.05061	5.40894	-0.358325	CHEMBL3800951	CHEMBL3800951	TRUE
Cc1nc(Oc2ccc3c(c2)OC(N)=C(C#N)C3c2ccc(F)cc2)cc(N2CCN(CCO)CC2)n1	Cc1nc(Oc2ccc3c(c2)OC(N)=C(C#N)C3c2ccc(Cl)cc2)cc(N2CCN(CCO)CC2)n1	3.77989	4.13668	-0.356785	CHEMBL4045572	CHEMBL4045572	TRUE
COc1ccc(-c2ccc(Oc3cccc4c3CCCC4)c(NC(=O)Nc3ccccc3F)c2)cc1C(=O)O	COc1ccc(-c2ccc(Oc3cccc4c3CCCC4)c(NC(=O)Nc3ccccc3Cl)c2)cc1C(=O)O	7.30103	7.65758	-0.356547	CHEMBL4001268	CHEMBL4001268	TRUE
O=S(=O)(Nc1nccs1)c1cc(F)c(NCC2NCCC=C2c2ccc(F)cc2)cc1F	O=S(=O)(Nc1nccs1)c1cc(Cl)c(NCC2NCCC=C2c2ccc(F)cc2)cc1F	7.1549	7.50864	-0.353736	CHEMBL4017759	CHEMBL4017759	TRUE
CS(=O)(=O)NC(=O)c1cc(Cl)c(-n2nc(F)c3cc(-c4cccc(F)c4)ccc32)cc1F	CS(=O)(=O)NC(=O)c1cc(Cl)c(-n2nc(F)c3cc(-c4cccc(Cl)c4)ccc32)cc1F	7.04576	7.39794	-0.352183	CHEMBL4002420	CHEMBL4002420	TRUE
Fc1ccc(C=Cc2ccccc2F)cc1	Fc1ccccc1C=Cc1ccc(Cl)cc1	5.4437	5.79588	-0.352183	CHEMBL3879610	CHEMBL3879610	TRUE
CN(CCCNc1cc(=O)oc2ccccc12)C(=O)c1cccc(F)c1	CN(CCCNc1cc(=O)oc2ccccc12)C(=O)c1cccc(Cl)c1	5.08725	5.43771	-0.35046	CHEMBL4012419	CHEMBL4012419	TRUE
Fc1cccc(C[n+]2cccc(Cn3c4c(c5ccccc53)CCCC4)c2)c1	Clc1cccc(C[n+]2cccc(Cn3c4c(c5ccccc53)CCCC4)c2)c1	6.25181	6.60206	-0.350248	CHEMBL4155445	CHEMBL4155445	TRUE
O=C(O)CCC(=O)N1N=C(c2c(-c3ccc(Cl)cc3)c3ccccc3[nH]c2=O)CC1c1ccc(F)cc1	O=C(O)CCC(=O)N1N=C(c2c(-c3ccc(Cl)cc3)c3ccccc3[nH]c2=O)CC1c1ccc(Cl)cc1	4.3279	4.67778	-0.349879	CHEMBL2427899	CHEMBL2427899	TRUE
O=C(O)c1ccc(-n2cc(C(=O)c3c(F)cccc3F)c3ccccc32)cc1	O=C(O)c1ccc(-n2cc(C(=O)c3c(F)cccc3Cl)c3ccccc32)cc1	6.35164	6.70115	-0.349507	CHEMBL4349913	CHEMBL4349913	TRUE
C#CCNS(=O)(=O)c1ccc(CCN(Cc2cc(F)ccc2OCCC)C(=O)Cc2ccsc2)cc1	C#CCNS(=O)(=O)c1ccc(CCN(Cc2cc(Cl)ccc2OCCC)C(=O)Cc2ccsc2)cc1	6.17393	6.52288	-0.348954	CHEMBL4416608	CHEMBL4416608	TRUE
CN(C)CCNc1cc(C=Cc2ccco2)nc2ccc(F)cc12	CN(C)CCNc1cc(C=Cc2ccco2)nc2ccc(Cl)cc12	7.08302	7.4318	-0.348778	CHEMBL4671338	CHEMBL4671338	TRUE
Cc1nc2ccccc2c(-c2ccccc2F)c1C(OC(C)(C)C)C(=O)O	Cc1nc2ccccc2c(-c2ccccc2Cl)c1C(OC(C)(C)C)C(=O)O	6.23657	6.58503	-0.348455	CHEMBL4269517	CHEMBL4269517	TRUE
O=c1c2cccc(COc3ccc(-c4cc(F)c(F)cc4F)cc3)c2[nH]n1CC(O)CO	O=c1c2cccc(COc3ccc(-c4cc(F)c(F)cc4Cl)cc3)c2[nH]n1CC(O)CO	6.23657	6.58503	-0.348455	CHEMBL2384006	CHEMBL2384006	TRUE
O=C(c1ccc(-c2ccc(F)cc2)o1)n1cncn1	O=C(c1ccc(-c2ccc(Cl)cc2)o1)n1cncn1	5.06048	5.40894	-0.348455	CHEMBL3826277	CHEMBL3826277	TRUE
CCn1nnc(C2OC(n3cnc4c(NCc5cccc(F)c5)nc(Cl)nc43)C(O)C2O)n1	CCn1nnc(C2OC(n3cnc4c(NCc5cccc(Cl)c5)nc(Cl)nc43)C(O)C2O)n1	8.21896	8.56703	-0.348068	CHEMBL4052147	CHEMBL4052147	TRUE
O=S(=O)(c1ccccc1F)N1CCN(c2nc(NCCN3CCOCC3)nc(N3CCOCC3)n2)CC1	O=S(=O)(c1ccccc1Cl)N1CCN(c2nc(NCCN3CCOCC3)nc(N3CCOCC3)n2)CC1	6.90928	7.25665	-0.347363	CHEMBL4689246	CHEMBL4689246	TRUE
NOCc1ccccc1F	NOCc1ccccc1Cl	5.85387	6.20066	-0.346787	CHEMBL3767626	CHEMBL3767626	TRUE
O=S(=O)(c1ccc(Cl)cc1)N1CCCc2ccc(Oc3cc(-c4nc(C5CC5)no4)cc(F)n3)cc21	O=S(=O)(c1ccc(Cl)cc1)N1CCCc2ccc(Oc3cc(-c4nc(C5CC5)no4)cc(Cl)n3)cc21	6.50864	6.85387	-0.345234	CHEMBL3118586	CHEMBL3118586	TRUE
N#CC1CCOCC1n1cc(C(N)=O)c(Nc2ccc(F)cc2)n1	N#CC1CCOCC1n1cc(C(N)=O)c(Nc2ccc(Cl)cc2)n1	7.50864	7.85387	-0.345234	CHEMBL4033006	CHEMBL4033006	TRUE
CNCC(O)CN1CCc2c(cccc2Oc2ccc(F)cc2)C1	CNCC(O)CN1CCc2c(cccc2Oc2ccc(Cl)cc2)C1	5.58336	5.92812	-0.344759	CHEMBL4398063	CHEMBL4398063	TRUE
Fc1ccc(-c2ncnc3c2cnn3CCN2CCCCC2)cc1	Clc1ccc(-c2ncnc3c2cnn3CCN2CCCCC2)cc1	7.02228	7.36653	-0.344255	CHEMBL4262391	CHEMBL4262391	TRUE
O=C(CC(c1ccc(F)cc1)C(C(=O)Nc1ccccn1)C(=O)Nc1ccccn1)c1ccc(F)cc1	O=C(CC(c1ccc(Cl)cc1)C(C(=O)Nc1ccccn1)C(=O)Nc1ccccn1)c1ccc(F)cc1	4.43652	4.77989	-0.343373	CHEMBL3773701	CHEMBL3773701	TRUE
CCN(Cc1ccccc1)C(=O)c1nc(-c2ccc(F)cc2)c2ccccc2n1	CCN(Cc1ccccc1)C(=O)c1nc(-c2ccc(Cl)cc2)c2ccccc2n1	8.77469	9.11805	-0.343354	CHEMBL3269398	CHEMBL3269398	TRUE
N#Cc1ccnc(N2C(=O)CCC2C(=O)N(c2cccc(F)c2)C2(C(=O)NC3CC(F)(F)C3)CCc3cc(F)ccc32)c1	N#Cc1ccnc(N2C(=O)CCC2C(=O)N(c2cccc(F)c2)C2(C(=O)NC3CC(F)(F)C3)CCc3cc(Cl)ccc32)c1	6.96658	7.3098	-0.343228	CHEMBL4180676	CHEMBL4180676	TRUE
O=S1(=O)c2ccc(Oc3cc(F)cc(F)c3)c(C(F)F)c2C(O)C1(F)F	O=S1(=O)c2ccc(Oc3cc(F)cc(Cl)c3)c(C(F)F)c2C(O)C1(F)F	7.95861	8.30103	-0.342423	CHEMBL4158376	CHEMBL4158376	TRUE
O=c1[nH]c(CSc2nc3cc(-c4ccc(F)cc4)nn3c(=O)[nH]2)c(Cl)c(=O)[nH]1	O=c1[nH]c(CSc2nc3cc(-c4ccc(Cl)cc4)nn3c(=O)[nH]2)c(Cl)c(=O)[nH]1	4.64589	4.98716	-0.341271	CHEMBL3088704	CHEMBL3088704	TRUE
CC1(C)CCC23CCC4(C)C5(C)CCC6C(C)(C)C(=O)C(=Cc7ccc(F)cc7)CC6(C)C5CC(F)C4(OC2=O)C3C1	CC1(C)CCC23CCC4(C)C5(C)CCC6C(C)(C)C(=O)C(=Cc7ccc(Cl)cc7)CC6(C)C5CC(F)C4(OC2=O)C3C1	5.82102	6.16115	-0.340128	CHEMBL4424116	CHEMBL4424116	TRUE
CC(C)(C)n1nc(Cc2cccc(Cl)c2F)c2c(N)ncnc21	CC(C)(C)n1nc(Cc2cccc(Cl)c2Cl)c2c(N)ncnc21	8.13253	8.47108	-0.338551	CHEMBL2330480	CHEMBL2330480	TRUE
Cc1cc(C)cc(-c2cncc(-c3nc4cc(F)ccc4[nH]3)c2N2CCC(N)CC2)c1	Cc1cc(C)cc(-c2cncc(-c3nc4cc(Cl)ccc4[nH]3)c2N2CCC(N)CC2)c1	5.4318	5.76955	-0.337753	CHEMBL4841563	CHEMBL4841563	TRUE
O=C(Nc1cccnc1)c1ccccc1OCc1c(F)cccc1Cl	O=C(Nc1cccnc1)c1ccccc1OCc1c(Cl)cccc1Cl	5.82391	6.16115	-0.337242	CHEMBL4412720	CHEMBL4412720	TRUE
Fc1ccccc1C[n+]1ccc(Cn2c3c(c4ccccc42)CCCC3)cc1	Clc1ccccc1C[n+]1ccc(Cn2c3c(c4ccccc42)CCCC3)cc1	6.20066	6.5376	-0.336943	CHEMBL4155445	CHEMBL4155445	TRUE
O=C(Nc1ccc(CP(=O)(O)O)cc1)C1CCN(C(=O)OCc2ccccc2F)CC1	O=C(Nc1ccc(CP(=O)(O)O)cc1)C1CCN(C(=O)OCc2ccccc2Cl)CC1	8.14691	8.4828	-0.335894	CHEMBL4197618	CHEMBL4197618	TRUE
O=C(O)C1CCS(=O)(=O)N1Cc1cccc(COc2ccc(-c3cc(F)c(F)cc3F)cc2)c1	O=C(O)C1CCS(=O)(=O)N1Cc1cccc(COc2ccc(-c3cc(F)c(F)cc3Cl)cc2)c1	5.73993	6.07572	-0.335792	CHEMBL3225902	CHEMBL3225902	TRUE
O=C1C[CH](C(=O)NC(c2ccc(Cl)cc2)c2ccc(F)c(C(F)(F)F)c2)CN1	O=C1C[CH](C(=O)NC(c2ccc(Cl)cc2)c2ccc(Cl)c(C(F)(F)F)c2)CN1	8.58503	8.92082	-0.335792	CHEMBL5135965	CHEMBL5135965	TRUE
Cn1cc(-c2cnc3ccc(CCn4nc(-c5cccc(F)c5)ccc4=O)cc3c2)cn1	Cn1cc(-c2cnc3ccc(CCn4nc(-c5cccc(Cl)c5)ccc4=O)cc3c2)cn1	7.97469	8.3098	-0.33511	CHEMBL5100223	CHEMBL5100223	TRUE
CCc1ccc(-c2nc3c(c(C)nn3-c3ccccc3)c(-c3ccccc3F)c2C#N)cc1	CCc1ccc(-c2nc3c(c(C)nn3-c3ccccc3)c(-c3ccccc3Cl)c2C#N)cc1	6.10624	6.44009	-0.333855	CHEMBL4671169	CHEMBL4671169	TRUE
O=c1c2cccc(COc3ccc(-c4cc(F)c(F)cc4F)cc3)c2[nH]n1-c1cccnc1	O=c1c2cccc(COc3ccc(-c4cc(F)c(F)cc4Cl)cc3)c2[nH]n1-c1cccnc1	5.39686	5.73049	-0.333631	CHEMBL2384006	CHEMBL2384006	TRUE
O=C(NCc1cccc(F)c1)c1nc(-c2ccc(F)cc2)[nH]c(=O)c1O	O=C(NCc1cccc(Cl)c1)c1nc(-c2ccc(F)cc2)[nH]c(=O)c1O	5.52288	5.85387	-0.330993	CHEMBL3373172	CHEMBL3373172	TRUE
COc1cccc(F)c1CC1CNC(=NN(C)C)CN(CC(=O)Nc2cccc(-c3cnn(C)c3)c2)C1=O	COc1cccc(Cl)c1CC1CNC(=NN(C)C)CN(CC(=O)Nc2cccc(-c3cnn(C)c3)c2)C1=O	4.52288	4.85387	-0.330993	CHEMBL4125122	CHEMBL4125122	TRUE
CCN(CC)C(=O)C1Sc2ccccc2-c2c1c1cc(F)ccc1n2CCF	CCN(CC)C(=O)C1Sc2ccccc2-c2c1c1cc(Cl)ccc1n2CCF	9.3098	9.63827	-0.328468	CHEMBL2378342	CHEMBL2378342	TRUE
CC1(C)CCCC(C)(C2CCC3(C)C2C(O)CC2C4(C)CC(=Cc5ccc(F)cc5)C(=NNC(N)=O)C(C)(C)C4CCC23C)O1	CC1(C)CCCC(C)(C2CCC3(C)C2C(O)CC2C4(C)CC(=Cc5ccc(Cl)cc5)C(=NNC(N)=O)C(C)(C)C4CCC23C)O1	4.93181	5.25964	-0.327823	CHEMBL4704788	CHEMBL4704788	TRUE
COc1cc2c(c(OC)c1OC)C(c1ccc(F)cc1)NC(=O)N2	COc1cc2c(c(OC)c1OC)C(c1ccc(Cl)cc1)NC(=O)N2	4.85387	5.18046	-0.326584	CHEMBL4186172	CHEMBL4186172	TRUE
N#Cc1ccc2cc3c(=O)n(-c4ccc(F)cc4)c(=O)nc-3n(-c3ccc(O)cc3)c2c1	N#Cc1ccc2cc3c(=O)n(-c4ccc(Cl)cc4)c(=O)nc-3n(-c3ccc(O)cc3)c2c1	7.1549	7.48149	-0.326584	CHEMBL4386568	CHEMBL4386568	TRUE
CC(C)(C)c1cc(C(=O)C(C#N)=NNc2cc(F)cc(F)c2)no1	CC(C)(C)c1cc(C(=O)C(C#N)=NNc2cc(F)cc(Cl)c2)no1	5.27572	5.60206	-0.326336	CHEMBL3595150	CHEMBL3595150	TRUE
NC(=NC(=NS(=O)(=O)N1CCCCC1)N1CC(c2ccccc2)C(c2ccc(Cl)cc2)=N1)c1ccc(F)cc1	NC(=NC(=NS(=O)(=O)N1CCCCC1)N1CC(c2ccccc2)C(c2ccc(Cl)cc2)=N1)c1ccc(Cl)cc1	7.4437	7.76955	-0.325854	CHEMBL5048446	CHEMBL5048446	TRUE
N#CN=C1SCCN1C(=O)c1ccc(-c2ccc(F)cc2)o1	N#CN=C1SCCN1C(=O)c1ccc(-c2ccc(Cl)cc2)o1	4.25414	4.5784	-0.324251	CHEMBL4775064	CHEMBL4775064	TRUE
O=C1CCc2cc(C(c3ccncc3)c3ccc(F)cc3)cc3c2N1CC3	O=C1CCc2cc(C(c3ccncc3)c3ccc(Cl)cc3)cc3c2N1CC3	6.93554	7.25964	-0.324095	CHEMBL2321525	CHEMBL2321525	TRUE
O=C(Nc1ccc(F)cc1)Nc1cccnc1Oc1cccc(C(F)(F)F)c1	O=C(Nc1ccc(Cl)cc1)Nc1cccnc1Oc1cccc(C(F)(F)F)c1	6.83863	7.16115	-0.322519	CHEMBL2339550	CHEMBL2339550	TRUE
COc1nc(C2=NOCC(c3ccc(C(F)(F)F)c(F)c3)N2)ccc1-n1cnc(C)c1	COc1nc(C2=NOCC(c3ccc(C(F)(F)F)c(Cl)c3)N2)ccc1-n1cnc(C)c1	7.67778	8	-0.322219	CHEMBL4839804	CHEMBL4839804	TRUE
O=C(NCCCN1CCCC1)c1cc(-c2ccccc2F)nc2[nH]ncc12	O=C(NCCCN1CCCC1)c1cc(-c2ccccc2Cl)nc2[nH]ncc12	4.77469	5.09691	-0.322219	CHEMBL4681720	CHEMBL4681720	TRUE
NS(=O)(=O)c1ccc(NC(=O)Cc2ccccc2Br)c(F)c1	NS(=O)(=O)c1ccc(NC(=O)Cc2ccccc2Br)c(Cl)c1	8.0655	8.38722	-0.321715	CHEMBL2406031	CHEMBL2406031	TRUE
O=C(NNC(=O)c1csc(-c2ccc(F)cc2)n1)c1ccccn1	O=C(NNC(=O)c1csc(-c2ccc(Cl)cc2)n1)c1ccccn1	5.35655	5.67778	-0.321233	CHEMBL4195474	CHEMBL4195474	TRUE
O=C(Nc1cc(F)ccc1C(=O)O)c1ccc(-c2ccccc2)cc1	O=C(Nc1cc(Cl)ccc1C(=O)O)c1ccc(-c2ccccc2)cc1	4.73993	5.06048	-0.320552	CHEMBL3129686	CHEMBL3129686	TRUE
CN1CCC(c2c(O)cc(O)c3c2OC(c2ccccc2F)CC3=O)C(O)C1	CN1CCC(c2c(O)cc(O)c3c2OC(c2ccccc2Cl)CC3=O)C(O)C1	8.63827	8.95861	-0.320335	CHEMBL5123365	CHEMBL5123365	TRUE
CC1(C)Oc2cc(C#Cc3ccccc3C(F)(F)F)ccc2-c2nc(-c3c(F)cncc3Cl)[nH]c21	CC1(C)Oc2cc(C#Cc3ccccc3C(F)(F)F)ccc2-c2nc(-c3c(Cl)cncc3Cl)[nH]c21	6.77032	7.09002	-0.319698	CHEMBL4029858	CHEMBL4029858	TRUE
COc1cc(C=CC(=O)NO)ccc1OCC(Cc1c[nH]c2ccccc12)NC(=O)c1ccc(F)cc1	COc1cc(C=CC(=O)NO)ccc1OCC(Cc1c[nH]c2ccccc12)NC(=O)c1ccc(Cl)cc1	7.31336	7.63264	-0.31928	CHEMBL4017597	CHEMBL4017597	TRUE
Cc1cccc(C(=O)NC2CC(n3cnc4c(NCc5cccc(F)c5)ncnc43)C2)n1	Cc1cccc(C(=O)NC2CC(n3cnc4c(NCc5cccc(Cl)c5)ncnc43)C2)n1	7.82391	8.14267	-0.318759	CHEMBL4046562	CHEMBL4046562	TRUE
CCc1cccc(CC)c1NC(=O)Nc1ccc(-c2sc(C)nc2-c2ccc(F)cc2)cc1	CCc1cccc(CC)c1NC(=O)Nc1ccc(-c2sc(C)nc2-c2ccc(Cl)cc2)cc1	5.075	5.39362	-0.318619	CHEMBL4049898	CHEMBL4049898	TRUE
CC1(Cn2cnc3ccc(C#N)cc32)CCCC2(CN(c3ccccc3F)C(=O)O2)C1	CC1(Cn2cnc3ccc(C#N)cc32)CCCC2(CN(c3ccccc3Cl)C(=O)O2)C1	8.284	8.60206	-0.318063	CHEMBL4307491	CHEMBL4307491	TRUE
CC=CCn1cc(-c2ccc(C(=O)N3CCOCC3)c(F)c2)n2cncc2c1=O	CC=CCn1cc(-c2ccc(C(=O)N3CCOCC3)c(Cl)c2)n2cncc2c1=O	6.01457	6.33255	-0.317974	CHEMBL4481830	CHEMBL4481830	TRUE
Fc1ccccc1NCc1coc(/C=C/c2ccc(C(F)(F)F)cc2)n1	FC(F)(F)c1ccc(/C=C/c2nc(CNc3ccccc3Cl)co2)cc1	5.23732	5.5544	-0.317074	CHEMBL5122916	CHEMBL5122916	TRUE
COc1cc2ncnc(Nc3ccc(F)cc3)c2cc1OCCCC(=O)NO	COc1cc2ncnc(Nc3ccc(Cl)cc3)c2cc1OCCCC(=O)NO	6.42481	6.73993	-0.315116	CHEMBL3762407	CHEMBL3762407	TRUE
O=c1c(-c2ccc(F)cc2)c2ccccn2c(=O)n1CCCCN1CC=C(c2c[nH]c3ccc(F)cc23)CC1	O=c1c(-c2ccc(F)cc2)c2ccccn2c(=O)n1CCCCN1CC=C(c2c[nH]c3ccc(Cl)cc23)CC1	6.65817	6.97306	-0.314888	CHEMBL3399329	CHEMBL3399329	TRUE
O=S(=O)(c1ccc(F)c(F)c1)c1cnc2cc(F)ccc2c1-c1ccc(Cl)cc1	O=S(=O)(c1ccc(F)c(Cl)c1)c1cnc2cc(F)ccc2c1-c1ccc(Cl)cc1	7.767	8.08092	-0.313918	CHEMBL4008945	CHEMBL4008945	TRUE
CS(=O)(=O)c1ccc(NC(=O)N/N=C\c2ccc(F)cc2)cc1	CS(=O)(=O)c1ccc(NC(=O)N/N=C\c2ccc(Cl)cc2)cc1	6.1549	6.46852	-0.313619	CHEMBL5146863	CHEMBL5146863	TRUE
C=CC(=O)N(c1ccc(F)c(Cl)c1)c1ncnc2cc(OC)c(OCCCN3CCOCC3)cc12	C=CC(=O)N(c1ccc(Cl)c(Cl)c1)c1ncnc2cc(OC)c(OCCCN3CCOCC3)cc12	7.18575	7.49894	-0.313188	CHEMBL4385373	CHEMBL4385373	TRUE
Cc1cccc(-c2ccc3c(c2)c(F)nn3-c2cc(F)c(C(=O)NS(C)(=O)=O)cc2Cl)c1	Cc1cccc(-c2ccc3c(c2)c(Cl)nn3-c2cc(F)c(C(=O)NS(C)(=O)=O)cc2Cl)c1	7.09691	7.40894	-0.312025	CHEMBL4002420	CHEMBL4002420	TRUE
CCCCC#Cc1nc(NCc2cccc(F)c2)c2ncn(C3C(O)C(O)C4CC43)c2n1	CCCCC#Cc1nc(NCc2cccc(Cl)c2)c2ncn(C3C(O)C(O)C4CC43)c2n1	7.79588	8.10791	-0.312025	CHEMBL3132627	CHEMBL3132627	TRUE
CCOC(=O)c1sc(Nc2ccc(C)c(F)c2)nc1C	CCOC(=O)c1sc(Nc2ccc(C)c(Cl)c2)nc1C	5.7018	6.01368	-0.311874	CHEMBL3413103	CHEMBL3413103	TRUE
Cc1cc(F)ccc1-c1cc2cc(CCC(=O)O)ccc2[nH]1	Cc1cc(Cl)ccc1-c1cc2cc(CCC(=O)O)ccc2[nH]1	4.24458	4.55642	-0.311842	CHEMBL4808635	CHEMBL4808635	TRUE
Cc1cc(C)nc(NC(=S)N2CCN(Cc3ccccc3F)CC2)c1	Cc1cc(C)nc(NC(=S)N2CCN(Cc3ccccc3Cl)CC2)c1	4.38722	4.69897	-0.311754	CHEMBL4121210	CHEMBL4121210	TRUE
COCC1NC(=O)c2ccc(F)cc2OCCCCCCOCC(C(=O)NC(Cc2ccccc2)C(=O)C2(C)CO2)NC1=O	COCC1NC(=O)c2ccc(Cl)cc2OCCCCCCOCC(C(=O)NC(Cc2ccccc2)C(=O)C2(C)CO2)NC1=O	6.68825	7	-0.311754	CHEMBL4371708	CHEMBL4371708	TRUE
Cc1cc(C)n(C(=O)c2coc(-c3ccc(F)cc3)n2)n1	Cc1cc(C)n(C(=O)c2coc(-c3ccc(Cl)cc3)n2)n1	5.07572	5.38722	-0.311495	CHEMBL3994053	CHEMBL3994053	TRUE
COc1cc(C(=O)NC2CC3CCCC(C2)N3CC(=O)Nc2cccc(F)c2)cc(OC)c1OC	COc1cc(C(=O)NC2CC3CCCC(C2)N3CC(=O)Nc2cccc(Cl)c2)cc(OC)c1OC	6.07572	6.38722	-0.311495	CHEMBL4611266	CHEMBL4611266	TRUE
O=S(=O)(NCCCNc1nccc(-c2[nH]c(-c3ccccc3)nc2-c2ccc(F)c(O)c2)n1)c1cccc(F)c1	O=S(=O)(NCCCNc1nccc(-c2[nH]c(-c3ccccc3)nc2-c2ccc(Cl)c(O)c2)n1)c1cccc(F)c1	7.51856	7.82974	-0.311181	CHEMBL4738306	CHEMBL4738306	TRUE
O=S(=O)(c1ccc(F)cc1)n1cnc2ccccc21	O=S(=O)(c1ccc(Cl)cc1)n1cnc2ccccc21	3.92	4.23	-0.31	CHEMBL4480800	CHEMBL4480800	TRUE
COc1ccc(F)cc1NC(=O)CN1CCN(S(=O)(=O)N2CCC(C)CC2)CC1	COc1ccc(Cl)cc1NC(=O)CN1CCN(S(=O)(=O)N2CCC(C)CC2)CC1	5.3098	5.61979	-0.309985	CHEMBL5217094	CHEMBL5217094	TRUE
C=CC(=O)Nc1cccc(Nc2nc(Nc3ccc(OCCCP(=O)(OCC)OCC)cc3)ncc2F)c1	C=CC(=O)Nc1cccc(Nc2nc(Nc3ccc(OCCCP(=O)(OCC)OCC)cc3)ncc2Cl)c1	7.66555	7.97469	-0.309148	CHEMBL3874808	CHEMBL3874808	TRUE
NS(=O)(=O)c1ccc(N2CCN=C2c2ccc(F)cc2)cc1	NS(=O)(=O)c1ccc(N2CCN=C2c2ccc(Cl)cc2)cc1	5.16115	5.46852	-0.30737	CHEMBL3365665	CHEMBL3365665	TRUE
O=c1cc(-c2ccnc(NC3CCOCC3)n2)ccn1C(CO)c1cc(F)cc(F)c1	O=c1cc(-c2ccnc(NC3CCOCC3)n2)ccn1C(CO)c1cc(F)cc(Cl)c1	7.08092	7.38722	-0.306294	CHEMBL3412888	CHEMBL3412888	TRUE
OCC1C(O)C(O)C2CSC(=NCc3ccc(F)cc3)N12	OCC1C(O)C(O)C2CSC(=NCc3ccc(Cl)cc3)N12	5.74473	6.05061	-0.305882	CHEMBL3869398	CHEMBL3869398	TRUE
NC(=O)C(c1ccccc1)N(C(=O)c1ccccc1)C1CCc2c(F)cc(F)cc21	NC(=O)C(c1ccccc1)N(C(=O)c1ccccc1)C1CCc2c(F)cc(Cl)cc21	5.02228	5.3279	-0.305626	CHEMBL4688480	CHEMBL4688480	TRUE
CCNC(=O)C1OC(n2cnc3c(N)nc(NCCN4CCN(c5ccc(F)c(Cl)c5)CC4)nc32)C(O)C1O	CCNC(=O)C1OC(n2cnc3c(N)nc(NCCN4CCN(c5ccc(Cl)c(Cl)c5)CC4)nc32)C(O)C1O	5.81304	6.11691	-0.303863	CHEMBL3419489	CHEMBL3419489	TRUE
CC(C)CNC(=O)c1c(-c2ccc(/C(C#N)=C/c3ccc(F)cc3)cc2)oc2ccccc12	CC(C)CNC(=O)c1c(-c2ccc(/C(C#N)=C/c3ccc(Cl)cc3)cc2)oc2ccccc12	4.70553	5.00877	-0.30324	CHEMBL5047656	CHEMBL5047656	TRUE
O=C(NCc1ccc(F)cc1)c1nn(CCO)c2c1CN(Cc1c[nH]c3ccccc13)CC2	O=C(NCc1ccc(Cl)cc1)c1nn(CCO)c2c1CN(Cc1c[nH]c3ccccc13)CC2	4.9393	5.24109	-0.301786	CHEMBL4380602	CHEMBL4380602	TRUE
O=C(O)c1cc(F)c2c(c1)C(=O)c1ccccc1C2=O	O=C(O)c1cc(Cl)c2c(c1)C(=O)c1ccccc1C2=O	4.61979	4.92082	-0.30103	CHEMBL4813813	CHEMBL4813813	TRUE
CS(=O)(=O)NC(=O)c1cc(Cl)c(-n2cc(Cl)c3cc(-c4ccc(F)cc4F)cnc32)cc1F	CS(=O)(=O)NC(=O)c1cc(Cl)c(-n2cc(Cl)c3cc(-c4ccc(F)cc4Cl)cnc32)cc1F	7.09691	7.39794	-0.30103	CHEMBL4002420	CHEMBL4002420	TRUE
Cc1nc2ccc(C(=O)c3cnn(C)c3O)cc2c(=O)n1-c1cccc(F)c1	Cc1nc2ccc(C(=O)c3cnn(C)c3O)cc2c(=O)n1-c1cccc(Cl)c1	7.69897	8	-0.30103	CHEMBL3388490	CHEMBL3388490	TRUE
O=C(Nc1ncc(F)s1)C(CC1CCOCC1)n1cc(S(=O)(=O)C2CC2)cn1	O=C(Nc1ncc(Cl)s1)C(CC1CCOCC1)n1cc(S(=O)(=O)C2CC2)cn1	5.39794	5.69897	-0.30103	CHEMBL4022283	CHEMBL4022283	TRUE
Fc1ccc(CNc2ccnc(-c3ccc4c(c3)OCO4)n2)cc1F	Fc1ccc(CNc2ccnc(-c3ccc4c(c3)OCO4)n2)cc1Cl	4.98297	5.284	-0.30103	CHEMBL2394347	CHEMBL2394347	TRUE
O=C(O)c1nccc(-c2ccc(F)cc2F)n1	O=C(O)c1nccc(-c2ccc(Cl)cc2F)n1	7.11919	7.42022	-0.30103	CHEMBL3871819	CHEMBL3871819	TRUE
CCC(CC)C(=O)Nc1ccc(N2CCN(C(C(=O)N(CC)CC)c3ccc(F)cc3)CC2)c(F)c1	CCC(CC)C(=O)Nc1ccc(N2CCN(C(C(=O)N(CC)CC)c3ccc(Cl)cc3)CC2)c(F)c1	6.69897	7	-0.30103	CHEMBL3107076	CHEMBL3107076	TRUE
NC1CC(N2Cc3cn[nH]c3C2)COC1c1cc(F)ccc1F	NC1CC(N2Cc3cn[nH]c3C2)COC1c1cc(F)ccc1Cl	4	4.30103	-0.30103	CHEMBL2429419	CHEMBL2429419	TRUE
Cc1cc(NC(=O)Nc2nnc(-c3ccncc3)s2)ccc1F	Cc1cc(NC(=O)Nc2nnc(-c3ccncc3)s2)ccc1Cl	4.80134	5.10237	-0.30103	CHEMBL2428261	CHEMBL2428261	TRUE
O=C(Nc1nccs1)C(CC1CCCCC1)n1cnc2ccc(F)cc2c1=O	O=C(Nc1nccs1)C(CC1CCCCC1)n1cnc2ccc(Cl)cc2c1=O	5.39794	5.69897	-0.30103	CHEMBL2353001	CHEMBL2353001	TRUE
O=C1CC(c2c(F)cccc2F)CC(O)=C1Sc1ccccc1Cl	O=C1CC(c2c(F)cccc2Cl)CC(O)=C1Sc1ccccc1Cl	5.13077	5.4318	-0.30103	CHEMBL3369984	CHEMBL3369984	TRUE
CC(C)(CC(=O)NC1C2CC3CC1CC(C(N)=O)(C3)C2)NS(=O)(=O)c1cccc(F)c1	CC(C)(CC(=O)NC1C2CC3CC1CC(C(N)=O)(C3)C2)NS(=O)(=O)c1cccc(Cl)c1	8.69897	9	-0.30103	CHEMBL3122300	CHEMBL3122300	TRUE
CN(C(=O)C(C#N)=Cc1cn(CC(=O)O)c2c(F)cccc12)c1ccccc1	CN(C(=O)C(C#N)=Cc1cn(CC(=O)O)c2c(Cl)cccc12)c1ccccc1	7	7.30103	-0.30103	CHEMBL2395624	CHEMBL2395624	TRUE
CN(C(=O)C(C#N)=Cc1cn(CC(=O)O)c2cccc(F)c12)c1ccccc1	CN(C(=O)C(C#N)=Cc1cn(CC(=O)O)c2cccc(Cl)c12)c1ccccc1	8	8.30103	-0.30103	CHEMBL2395624	CHEMBL2395624	TRUE
OCC1CC(O)CCN1CCc1ccc(Nc2nc(-c3ccccc3F)cs2)cc1	OCC1CC(O)CCN1CCc1ccc(Nc2nc(-c3ccccc3Cl)cs2)cc1	7.69897	8	-0.30103	CHEMBL2412224	CHEMBL2412224	TRUE
C#CCN(Cc1nc2cc(C(F)(F)F)ccc2nc1-c1ccccc1)c1ccc(F)cc1	C#CCN(Cc1nc2cc(C(F)(F)F)ccc2nc1-c1ccccc1)c1ccc(Cl)cc1	5.09691	5.39794	-0.30103	CHEMBL3122687	CHEMBL3122687	TRUE
O=C(O)C1CN(Cc2ccc(OCc3cccc(C(F)(F)F)c3)c(F)c2)C1	O=C(O)C1CN(Cc2ccc(OCc3cccc(C(F)(F)F)c3)c(Cl)c2)C1	8.69897	9	-0.30103	CHEMBL3744618	CHEMBL3744618	TRUE
O=c1[nH]c(-c2ccc(F)c(S(=O)(=O)NC3CCCC3)c2)cs1	O=c1[nH]c(-c2ccc(Cl)c(S(=O)(=O)NC3CCCC3)c2)cs1	6.30103	6.60206	-0.30103	CHEMBL3414207	CHEMBL3414207	TRUE
COc1cc(Sc2c(-c3ccccc3)[nH]c3cc(F)ccc23)cc(OC)c1OC	COc1cc(Sc2c(-c3ccccc3)[nH]c3cc(Cl)ccc23)cc(OC)c1OC	5.61979	5.92082	-0.30103	CHEMBL3599631	CHEMBL3599631	TRUE
O=C(NNS(=O)(=O)c1ccc2ccccc2c1)c1ccc(F)cc1	O=C(NNS(=O)(=O)c1ccc2ccccc2c1)c1ccc(Cl)cc1	3.92082	4.22185	-0.30103	CHEMBL4374938	CHEMBL4374938	TRUE
CNC(=O)c1ccc2c(c1)C(=O)c1ccc(Nc3cc(NC(=O)c4ccc(F)cc4)c(F)cc3F)cc1CC2	CNC(=O)c1ccc2c(c1)C(=O)c1ccc(Nc3cc(NC(=O)c4ccc(Cl)cc4)c(F)cc3F)cc1CC2	9.39794	9.69897	-0.30103	CHEMBL4019402	CHEMBL4019402	TRUE
N=C(N)NN=Cc1ccc(F)cc1	N=C(N)NN=Cc1ccc(Cl)cc1	4.85387	5.1549	-0.30103	CHEMBL3854585	CHEMBL3854585	TRUE
O=C(NCc1c(F)cccc1F)c1cnn(Cc2ccc(Cn3ccccc3=O)cc2)c1	O=C(NCc1c(F)cccc1Cl)c1cnn(Cc2ccc(Cn3ccccc3=O)cc2)c1	7.20761	7.50864	-0.30103	CHEMBL5112809	CHEMBL5112809	TRUE
Fc1c(-c2cccc3cccc(F)c23)ncc2c(N3CC4CCC(C3)N4)nc(OCC34CCCN3CCC4)nc12	Fc1c(-c2cccc3cccc(Cl)c23)ncc2c(N3CC4CCC(C3)N4)nc(OCC34CCCN3CCC4)nc12	6.42022	6.72125	-0.30103	CHEMBL5047300	CHEMBL5047300	TRUE
OCc1cn(-c2ccccc2F)nn1	OCc1cn(-c2ccccc2Cl)nn1	4.19382	4.49485	-0.30103	CHEMBL5166901	CHEMBL5166901	TRUE
COc1cc(N2CCC3(CCN(C)CC3)CC2)c(F)cc1Nc1ncc(Cl)c(Nc2ccccc2P(C)(C)=O)n1	COc1cc(N2CCC3(CCN(C)CC3)CC2)c(Cl)cc1Nc1ncc(Cl)c(Nc2ccccc2P(C)(C)=O)n1	8.69897	9	-0.30103	CHEMBL5147461	CHEMBL5147461	TRUE
CCC(=O)c1cc(-c2ccc(F)cc2)n(-c2ccc(S(N)(=O)=O)cc2)c1C	CCC(=O)c1cc(-c2ccc(Cl)cc2)n(-c2ccc(S(N)(=O)=O)cc2)c1C	5.92082	6.22185	-0.30103	CHEMBL4737248	CHEMBL4737248	TRUE
CN(Cc1ccc(F)cc1)Cc1nn(-c2ccccc2F)c2c1CCS(=O)(=O)O2	CN(Cc1ccc(Cl)cc1)Cc1nn(-c2ccccc2F)c2c1CCS(=O)(=O)O2	7.39794	7.69897	-0.30103	CHEMBL4708126	CHEMBL4708126	TRUE
O=c1ccc(-c2ccc3cn[nH]c3c2)cn1Cc1cccc(F)c1	O=c1ccc(-c2ccc3cn[nH]c3c2)cn1Cc1cccc(Cl)c1	7.13077	7.4318	-0.30103	CHEMBL4735373	CHEMBL4735373	TRUE
O=C(Nc1cc(F)c(F)c(F)c1)c1cc(S(=O)(=O)N2CCOCC2)c(Cl)cc1Cl	O=C(Nc1cc(F)c(Cl)c(F)c1)c1cc(S(=O)(=O)N2CCOCC2)c(Cl)cc1Cl	5.83033	6.13053	-0.300208	CHEMBL3998937	CHEMBL3998937	TRUE
CN(Cc1cc(=O)c(O)co1)c1ccc(F)cc1	CN(Cc1cc(=O)c(O)co1)c1ccc(Cl)cc1	5.7	6	-0.299999	CHEMBL4478546	CHEMBL4478546	TRUE
NC(=O)c1[nH]c2ccc(F)cc2c1-c1ccccc1	NC(=O)c1[nH]c2ccc(Cl)cc2c1-c1ccccc1	6.2	6.5	-0.299999	CHEMBL4670870	CHEMBL4670870	TRUE
CC(C)CC(NC(=O)C(Cc1ccccc1)NC(=O)c1cc(F)ccc1F)B(O)O	CC(C)CC(NC(=O)C(Cc1ccccc1)NC(=O)c1cc(Cl)ccc1F)B(O)O	7.04001	7.33999	-0.299984	CHEMBL5119452	CHEMBL5119452	TRUE
COc1ccc(N2C(=O)N(Cc3c(F)cc(F)cc3F)c3ccccc3S2(=O)=O)cc1OC	COc1ccc(N2C(=O)N(Cc3c(F)cc(F)cc3Cl)c3ccccc3S2(=O)=O)cc1OC	8.70006	9	-0.299943	CHEMBL3742876	CHEMBL3742876	TRUE
COc1ccc(-c2nnc(-c3ccc(C(=O)NN=Cc4ccc(F)cc4)cc3)o2)c(OC)c1	COc1ccc(-c2nnc(-c3ccc(C(=O)NN=Cc4ccc(Cl)cc4)cc3)o2)c(OC)c1	4.31731	4.6169	-0.29959	CHEMBL3599824	CHEMBL3599824	TRUE
COc1ccc(-c2nnc(-c3ccc(C(=O)NN=Cc4ccc(F)cc4)cc3)o2)c(OC)c1	COc1ccc(-c2nnc(-c3ccc(C(=O)NN=Cc4ccc(Cl)cc4)cc3)o2)c(OC)c1	4.31731	4.6169	-0.29959	CHEMBL3599824	CHEMBL3599824	TRUE
COC(=O)Cn1cnc2cc(C(=O)NCCCc3ccc(Cl)cc3)c(-c3cccc(F)c3)cc2c1=O	COC(=O)Cn1cnc2cc(C(=O)NCCCc3ccc(Cl)cc3)c(-c3cccc(Cl)c3)cc2c1=O	5.48945	5.78516	-0.295701	CHEMBL4710716	CHEMBL4710716	TRUE
O=C(O)c1cc2c(s1)-c1ccc(F)c(Cl)c1OC2	O=C(O)c1cc2c(s1)-c1ccc(Cl)c(Cl)c1OC2	7.11351	7.40894	-0.295426	CHEMBL3762926	CHEMBL3762926	TRUE
O=C(CCCCCCc1cccc(F)c1)N1CCCC1	O=C(CCCCCCc1cccc(Cl)c1)N1CCCC1	5.13668	5.4318	-0.295121	CHEMBL4369475	CHEMBL4369475	TRUE
O=C(COc1cc(=O)oc2ccccc12)N1CCN(c2ccccc2F)CC1	O=C(COc1cc(=O)oc2ccccc12)N1CCN(c2ccccc2Cl)CC1	4.36432	4.65876	-0.294448	CHEMBL3387730	CHEMBL3387730	TRUE
O=C(Nc1ccccc1F)c1c(NC(=O)C(F)(F)F)sc2c1CCCCC2	O=C(Nc1ccccc1Cl)c1c(NC(=O)C(F)(F)F)sc2c1CCCCC2	5.88606	6.18046	-0.294399	CHEMBL4015867	CHEMBL4015867	TRUE
O=C1Nc2ccc(C(=O)NC(CO)c3ccccc3)cc2C1=C(c1ncc[nH]1)c1ccccc1F	O=C1Nc2ccc(C(=O)NC(CO)c3ccccc3)cc2C1=C(c1ncc[nH]1)c1ccccc1Cl	7.20066	7.49485	-0.294191	CHEMBL4155717	CHEMBL4155717	TRUE
O=C(O)C(=Cc1ccc(F)cc1)CCCP(=O)(O)O	O=C(O)C(=Cc1ccc(Cl)cc1)CCCP(=O)(O)O	5.3098	5.6038	-0.293997	CHEMBL4269263	CHEMBL4269263	TRUE
Cc1cc(C)c(Nc2cc(F)cc(F)c2)c(C)c1	Cc1cc(C)c(Nc2cc(F)cc(Cl)c2)c(C)c1	5.24413	5.5376	-0.293477	CHEMBL3810792	CHEMBL3810792	TRUE
COc1cc(CN2CCN(c3ccccc3F)CC2)c2cc3[n+](cc2c1O)CCc1cc2c(cc1-3)OCO2	COc1cc(CN2CCN(c3ccccc3Cl)CC2)c2cc3[n+](cc2c1O)CCc1cc2c(cc1-3)OCO2	5.284	5.57675	-0.292757	CHEMBL4179267	CHEMBL4179267	TRUE
Nc1ccccc1NC(=O)c1ccc(CNC(=O)c2cc3ccc(OCc4ccccc4F)cc3oc2=O)cc1	Nc1ccccc1NC(=O)c1ccc(CNC(=O)c2cc3ccc(OCc4ccccc4Cl)cc3oc2=O)cc1	5.03058	5.32239	-0.291809	CHEMBL4029643	CHEMBL4029643	TRUE
COc1cc2c(Nc3ccc(Br)cc3F)ncnc2cc1OCC1CNCCO1	COc1cc2c(Nc3ccc(Br)cc3Cl)ncnc2cc1OCC1CNCCO1	6.34679	6.63827	-0.291485	CHEMBL3376294	CHEMBL3376294	TRUE
CCOC(=O)C(C#N)=C[C-](C(=O)c1ccc(F)cc1)[n+]1ccc(N(C)C)cc1	CCOC(=O)C(C#N)=C[C-](C(=O)c1ccc(Cl)cc1)[n+]1ccc(N(C)C)cc1	4.20551	4.49635	-0.290834	CHEMBL2439342	CHEMBL2439342	TRUE
CC#CCn1c(N2CCCC(N)C2)cc(=O)n(Cc2ccc(F)cc2C(=O)O)c1=O	CC#CCn1c(N2CCCC(N)C2)cc(=O)n(Cc2ccc(Cl)cc2C(=O)O)c1=O	8.11919	8.40894	-0.289749	CHEMBL4413686	CHEMBL4413686	TRUE
CNCCN1CCC(OCc2ccccc2F)CC1	CNCCN1CCC(OCc2ccccc2Cl)CC1	7.45593	7.74473	-0.288796	CHEMBL3859042	CHEMBL3859042	TRUE
O=C(O)c1ccc(F)s1	O=C(O)c1ccc(Cl)s1	5.85387	6.14267	-0.288796	CHEMBL4268780	CHEMBL4268780	TRUE
O=C(Nc1ccc(F)cc1)C1(c2ccc3c(c2)CCN3c2ccccn2)CCC1	O=C(Nc1ccc(Cl)cc1)C1(c2ccc3c(c2)CCN3c2ccccn2)CCC1	8.50864	8.79588	-0.287242	CHEMBL4813761	CHEMBL4813761	TRUE
O=c1[nH]c2[nH]ncc2c2nc(-c3ccc(F)cc3)nn12	O=c1[nH]c2[nH]ncc2c2nc(-c3ccc(Cl)cc3)nn12	7.20761	7.49485	-0.287242	CHEMBL4054662	CHEMBL4054662	TRUE
COc1cc2c[n+](C)c3ccc(F)cc3c2cc1OC	COc1cc2c[n+](C)c3ccc(Cl)cc3c2cc1OC	2.57025	2.85699	-0.286737	CHEMBL3295577	CHEMBL3295577	TRUE
COC(=O)c1c(O)cc(O)c(Cl)c1CCc1nccn1Cc1ccc(F)cc1	COC(=O)c1c(O)cc(O)c(Cl)c1CCc1nccn1Cc1ccc(Cl)cc1	4.63078	4.91721	-0.28643	CHEMBL3806601	CHEMBL3806601	TRUE
N#CC1=C(N)Oc2c(c(=O)oc3ccccc23)C1c1cc[n+](Cc2ccccc2F)cc1	N#CC1=C(N)Oc2c(c(=O)oc3ccccc23)C1c1cc[n+](Cc2ccccc2Cl)cc1	5.5376	5.82391	-0.286307	CHEMBL2428569	CHEMBL2428569	TRUE
Fc1ccc(C=NC2CCN(Cc3ccccc3)CC2)cc1	Clc1ccc(C=NC2CCN(Cc3ccccc3)CC2)cc1	5.5376	5.82391	-0.286307	CHEMBL4433401	CHEMBL4433401	TRUE
CN1Cc2cc(-c3ccc(-c4cnc(F)c(NS(=O)(=O)c5ccc(F)cc5F)c4)s3)ccc2C1=O	CN1Cc2cc(-c3ccc(-c4cnc(Cl)c(NS(=O)(=O)c5ccc(F)cc5F)c4)s3)ccc2C1=O	5.70115	5.98716	-0.286016	CHEMBL4130818	CHEMBL4130818	TRUE
CC(=O)NC1C(NC(=N)NC(=O)Cn2cc(-c3ccc(F)cc3)nn2)C=C(C(=O)O)OC1C(O)C(O)CO	CC(=O)NC1C(NC(=N)NC(=O)Cn2cc(-c3ccc(Cl)cc3)nn2)C=C(C(=O)O)OC1C(O)C(O)CO	7.56864	7.85387	-0.285236	CHEMBL3871453	CHEMBL3871453	TRUE
O=c1ccc(OCCCN2CCCCC2)nn1-c1ccc(F)c(F)c1	O=c1ccc(OCCCN2CCCCC2)nn1-c1ccc(F)c(Cl)c1	5.72354	6.00877	-0.285236	CHEMBL3806618	CHEMBL3806618	TRUE
Cn1c(NCC(=O)c2cccc(F)c2)nc(-c2ccncc2)cc1=O	Cn1c(NCC(=O)c2cccc(Cl)c2)nc(-c2ccncc2)cc1=O	7.60206	7.88606	-0.283997	CHEMBL3097577	CHEMBL3097577	TRUE
CN1CCN(c2nc(N)nc(Cc3ccc(F)cc3)n2)CC1	CN1CCN(c2nc(N)nc(Cc3ccc(Cl)cc3)n2)CC1	7	7.284	-0.283997	CHEMBL4035125	CHEMBL4035125	TRUE
O=C(O)C=C1CCCc2cc(F)ccc2C1O	O=C(O)C=C1CCCc2cc(Cl)ccc2C1O	7	7.284	-0.283997	CHEMBL5099988	CHEMBL5099988	TRUE
O=C1NC(=Nc2nnc(-c3ccc(F)cc3)s2)SC1=Cc1ccccc1Cl	O=C1NC(=Nc2nnc(-c3ccc(Cl)cc3)s2)SC1=Cc1ccccc1Cl	4.18776	4.47108	-0.283328	CHEMBL2438384	CHEMBL2438384	TRUE
Nc1nc2cc(CC3CCC4(O)C(O)C(n5ccc6c(N)ncnc65)OC34)ccc2cc1F	Nc1nc2cc(CC3CCC4(O)C(O)C(n5ccc6c(N)ncnc65)OC34)ccc2cc1Cl	8.63827	8.92082	-0.282547	CHEMBL4808435	CHEMBL4808435	TRUE
CC(=O)c1nnn(-c2ccc(F)cc2)c1C	CC(=O)c1nnn(-c2ccc(Cl)cc2)c1C	6.63827	6.92082	-0.282547	CHEMBL4770893	CHEMBL4770893	TRUE
Nc1nc(NCc2cccc(F)c2)nc2ccccc12	Nc1nc(NCc2cccc(Cl)c2)nc2ccccc12	4.94692	5.22915	-0.282226	CHEMBL3817084	CHEMBL3817084	TRUE
CCS(=O)(=O)Nc1cccc(-c2cc(=O)n(-c3ccc(F)c(Cl)c3)nc2C)c1	CCS(=O)(=O)Nc1cccc(-c2cc(=O)n(-c3ccc(Cl)c(Cl)c3)nc2C)c1	5.29499	5.57675	-0.281762	CHEMBL2399205	CHEMBL2399205	TRUE
O=S(=O)(C=Cc1cccc(Cl)n1)c1ccc(F)cc1	O=S(=O)(C=Cc1cccc(Cl)n1)c1ccc(Cl)cc1	5.55471	5.83594	-0.281237	CHEMBL4712767	CHEMBL4712767	TRUE
O=C(Nc1nnc(-c2ccc(F)cc2)o1)c1ccc(F)cc1	O=C(Nc1nnc(-c2ccc(F)cc2)o1)c1ccc(Cl)cc1	4.76955	5.05061	-0.281059	CHEMBL4384517	CHEMBL4384517	TRUE
O=c1ccc2ncc(F)cc2n1CCN1CCC(NC(=S)Nc2ccc(F)cc2)CC1	O=c1ccc2ncc(F)cc2n1CCN1CCC(NC(=S)Nc2ccc(Cl)cc2)CC1	5.14874	5.42946	-0.280715	CHEMBL3364655	CHEMBL3364655	TRUE
O=C(CN(c1cccc([N+](=O)[O-])c1)S(=O)(=O)c1ccc(F)cc1)NO	O=C(CN(c1cccc([N+](=O)[O-])c1)S(=O)(=O)c1ccc(Cl)cc1)NO	5.47756	5.75696	-0.279406	CHEMBL5152850	CHEMBL5152850	TRUE
O=C(NCCC1CC1)c1ccc(N2CCN(C(=O)c3cc(F)ccc3Cl)CC2)nn1	O=C(NCCC1CC1)c1ccc(N2CCN(C(=O)c3cc(Cl)ccc3Cl)CC2)nn1	6.7167	6.99568	-0.27898	CHEMBL2321455	CHEMBL2321455	TRUE
CC(C(=O)NCc1ccc(C(F)(F)F)cc1-c1cccc(F)c1)c1ccc(NS(C)(=O)=O)c(F)c1	CC(C(=O)NCc1ccc(C(F)(F)F)cc1-c1cccc(Cl)c1)c1ccc(NS(C)(=O)=O)c(F)c1	8.72125	9	-0.278754	CHEMBL3630759	CHEMBL3630759	TRUE
CC(C(=O)NCc1ccc(C(F)(F)F)cc1-c1cccc(F)c1)c1ccc(NS(C)(=O)=O)c(F)c1	CC(C(=O)NCc1ccc(C(F)(F)F)cc1-c1cccc(Cl)c1)c1ccc(NS(C)(=O)=O)c(F)c1	8.72125	9	-0.278754	CHEMBL3630759	CHEMBL3630759	TRUE
CC1(C)Oc2cc(NS(=O)(=O)c3ccc(F)cc3F)ccc2NC1=O	CC1(C)Oc2cc(NS(=O)(=O)c3ccc(F)cc3Cl)ccc2NC1=O	5.56384	5.84164	-0.2778	CHEMBL4255966	CHEMBL4255966	TRUE
O=S(=O)(C=Cc1ncccc1F)c1ccc(F)cc1	O=S(=O)(C=Cc1ncccc1F)c1ccc(Cl)cc1	6.266	6.54363	-0.277633	CHEMBL4712767	CHEMBL4712767	TRUE
CCN(CC)CCCNc1nc(C=Cc2ccc(F)cc2)nc2ccc(F)cc12	CCN(CC)CCCNc1nc(C=Cc2ccc(F)cc2)nc2ccc(Cl)cc12	5.31426	5.59176	-0.277502	CHEMBL4315097	CHEMBL4315097	TRUE
Cn1cc(C(=O)Nc2ccc3oc(SCc4ccc(F)cc4)nc3c2)c(C(F)(F)F)n1	Cn1cc(C(=O)Nc2ccc3oc(SCc4ccc(Cl)cc4)nc3c2)c(C(F)(F)F)n1	6.67778	6.95468	-0.276896	CHEMBL3418823	CHEMBL3418823	TRUE
Cc1ccc(-n2c(C)nc3ccc(C(=O)c4cnn(C)c4O)cc3c2=O)c(F)c1	Cc1ccc(-n2c(C)nc3ccc(C(=O)c4cnn(C)c4O)cc3c2=O)c(Cl)c1	6.76955	7.04576	-0.276206	CHEMBL3388490	CHEMBL3388490	TRUE
COc1cc(-c2cc(F)cc(F)c2)c(F)cc1-n1c(=O)ccc2cc(S(=O)(=O)Nc3ccon3)ccc21	COc1cc(-c2cc(F)cc(F)c2)c(Cl)cc1-n1c(=O)ccc2cc(S(=O)(=O)Nc3ccon3)ccc21	7.76955	8.04576	-0.276206	CHEMBL4012328	CHEMBL4012328	TRUE
CN(C)c1cc[n+]([C-](C=C(C#N)C#N)C(=O)c2ccc(F)cc2)cc1	CN(C)c1cc[n+]([C-](C=C(C#N)C#N)C(=O)c2ccc(Cl)cc2)cc1	4.62764	4.90344	-0.275797	CHEMBL2439342	CHEMBL2439342	TRUE
Fc1ccc(-c2nc(-c3ccccc3)c(-c3ccccc3)n2CCCCCCNc2c3c(nc4ccccc24)CCCC3)cc1	Clc1ccc(-c2nc(-c3ccccc3)c(-c3ccccc3)n2CCCCCCNc2c3c(nc4ccccc24)CCCC3)cc1	7.25767	7.53343	-0.275761	CHEMBL2345930	CHEMBL2345930	TRUE
O=S(=O)(C=Cc1ncccc1F)c1cccc(F)c1	O=S(=O)(C=Cc1ncccc1F)c1cccc(Cl)c1	6.32422	6.5986	-0.274378	CHEMBL4712767	CHEMBL4712767	TRUE
Fc1ccccc1Nc1nc(-c2ccncc2)cs1	Clc1ccccc1Nc1nc(-c2ccncc2)cs1	5.3279	5.60206	-0.274158	CHEMBL4734095	CHEMBL4734095	TRUE
CCC(=C(c1ccc(C=CC(=O)O)cc1)c1ccc2[nH]ncc2c1F)c1ccccc1	CCC(=C(c1ccc(C=CC(=O)O)cc1)c1ccc2[nH]ncc2c1Cl)c1ccccc1	8.52288	8.79588	-0.273001	CHEMBL3637453	CHEMBL3637453	TRUE
Fc1ccc(-c2cn(C3CN4CCC3CC4)nn2)cc1	Clc1ccc(-c2cn(C3CN4CCC3CC4)nn2)cc1	7.82391	8.09691	-0.273001	CHEMBL3748597	CHEMBL3748597	TRUE
CCNC(=O)Nc1ccc(C(=O)Nc2cccc(F)c2)cn1	CCNC(=O)Nc1ccc(C(=O)Nc2cccc(Cl)c2)cn1	5.52288	5.79588	-0.273001	CHEMBL3373164	CHEMBL3373164	TRUE
Cc1ccc(Nc2nccc3ccc(NC(=O)CCCCCCC(=O)NO)cc23)c(F)c1	Cc1ccc(Nc2nccc3ccc(NC(=O)CCCCCCC(=O)NO)cc23)c(Cl)c1	7.40154	7.67366	-0.272126	CHEMBL3602647	CHEMBL3602647	TRUE
Cc1ccc(Nc2nccc3ccc(NC(=O)CCCCCCC(=O)NO)cc23)c(F)c1	Cc1ccc(Nc2nccc3ccc(NC(=O)CCCCCCC(=O)NO)cc23)c(Cl)c1	7.40154	7.67366	-0.272126	CHEMBL3602647	CHEMBL3602647	TRUE
CC(=O)OCC1Cc2c(-c3ccc(F)cn3)cccc2-c2c(O)ccc(C)c21	CC(=O)OCC1Cc2c(-c3ccc(Cl)cn3)cccc2-c2c(O)ccc(C)c21	4.17522	4.44648	-0.271258	CHEMBL5156187	CHEMBL5156187	TRUE
CN1CCN(c2nc(N)nc(-c3ccc(F)cc3)n2)CC1	CN1CCN(c2nc(N)nc(-c3ccc(Cl)cc3)n2)CC1	6.42251	6.6925	-0.269996	CHEMBL3293718	CHEMBL3293718	TRUE
Cc1occc1C(=O)NN=Cc1cccc(F)c1O	Cc1occc1C(=O)NN=Cc1cccc(Cl)c1O	4.58503	4.85387	-0.268845	CHEMBL3423828	CHEMBL3423828	TRUE
O=C1c2ccccc2C(=O)c2c1cc(NS(=O)(=O)c1ccc(-c3ccc(F)cc3)cc1)c(O)c2O	O=C1c2ccccc2C(=O)c2c1cc(NS(=O)(=O)c1ccc(-c3ccc(Cl)cc3)cc1)c(O)c2O	6.58503	6.85387	-0.268845	CHEMBL4666358	CHEMBL4666358	TRUE
Cc1c(C(=O)NN=Cc2cc(F)ccc2O)oc2cccc(O)c12	Cc1c(C(=O)NN=Cc2cc(Cl)ccc2O)oc2cccc(O)c12	7.23597	7.50446	-0.268482	CHEMBL4618022	CHEMBL4618022	TRUE
N=C(N)NCCCCC(=O)NCCN1CCC(NC(=O)C(=O)Nc2cncc(F)c2)CC12CCCCC2	N=C(N)NCCCCC(=O)NCCN1CCC(NC(=O)C(=O)Nc2cncc(Cl)c2)CC12CCCCC2	4	4.26761	-0.267606	CHEMBL5133924	CHEMBL5133924	TRUE
CC(C)(C)NC(=O)C(c1c(C(=O)O)[nH]c2cc(Cl)ccc12)N(C=O)Cc1ccc(OCc2ccccc2F)cc1	CC(C)(C)NC(=O)C(c1c(C(=O)O)[nH]c2cc(Cl)ccc12)N(C=O)Cc1ccc(OCc2ccccc2Cl)cc1	5.06349	5.33068	-0.267197	CHEMBL4362817	CHEMBL4362817	TRUE
CC(Nc1nc(N)nc(N)c1C#N)c1nn(-c2cccnc2)c2cc(F)ccc12	CC(Nc1nc(N)nc(N)c1C#N)c1nn(-c2cccnc2)c2cc(Cl)ccc12	8.4318	8.69897	-0.267172	CHEMBL5159594	CHEMBL5159594	TRUE
O=C(c1coc(-c2ccc(F)cc2)n1)n1cccn1	O=C(c1coc(-c2ccc(Cl)cc2)n1)n1cccn1	5.00877	5.27572	-0.26695	CHEMBL3994053	CHEMBL3994053	TRUE
O=C(O)CC1CCC(Oc2ccc(-c3ccc(-c4nc5cc(F)ccc5[nH]4)cn3)cn2)CC1	O=C(O)CC1CCC(Oc2ccc(-c3ccc(-c4nc5cc(Cl)ccc5[nH]4)cn3)cn2)CC1	8.61979	8.88606	-0.266268	CHEMBL4392490	CHEMBL4392490	TRUE
O=S(=O)(NCCCCN1CCC(c2noc3cc(F)ccc23)CC1)c1ccc(F)c(Cl)c1	O=S(=O)(NCCCCN1CCC(c2noc3cc(F)ccc23)CC1)c1ccc(Cl)c(Cl)c1	7.31876	7.58503	-0.266268	CHEMBL3297241	CHEMBL3297241	TRUE
O=C(O)C1CCCN(CCNN=Cc2ccccc2-c2ccc(F)cc2)C1	O=C(O)C1CCCN(CCNN=Cc2ccccc2-c2ccc(Cl)cc2)C1	5.746	6.012	-0.265998	CHEMBL2317558	CHEMBL2317558	TRUE
O=P(O)(O)C(F)(F)c1ccc(-c2cccc(Cc3ccc(F)cc3)c2)cc1	O=P(O)(O)C(F)(F)c1ccc(-c2cccc(Cc3ccc(Cl)cc3)c2)cc1	4.45593	4.72125	-0.265314	CHEMBL2432851	CHEMBL2432851	TRUE
COc1cc([CH](C)C(=O)N2CC[C]3(CCc4cc(-c5ncccn5)c(C)nc4N3)C2)c(F)cn1	COc1cc([CH](C)C(=O)N2CC[C]3(CCc4cc(-c5ncccn5)c(C)nc4N3)C2)c(Cl)cn1	9.33724	9.60206	-0.264818	CHEMBL5141272	CHEMBL5141272	TRUE
CCOC(=O)C1(c2ccccc2)N=C(c2ccccc2)N(Cc2ccc(F)cc2)C1c1ccccc1	CCOC(=O)C1(c2ccccc2)N=C(c2ccccc2)N(Cc2ccc(Cl)cc2)C1c1ccccc1	5.43063	5.69465	-0.264023	CHEMBL2411903	CHEMBL2411903	TRUE
NC(=O)c1csc2ncn(Cc3nnn(C[CH](O)c4cc5cc(F)ccc5o4)n3)c(=O)c12	NC(=O)c1csc2ncn(Cc3nnn(C[CH](O)c4cc5cc(Cl)ccc5o4)n3)c(=O)c12	7.65758	7.92082	-0.263241	CHEMBL5126028	CHEMBL5126028	TRUE
Cn1cnc(-c2ccc(CN)cc2F)c1-c1ccc(C#N)cc1	Cn1cnc(-c2ccc(CN)cc2Cl)c1-c1ccc(C#N)cc1	4.95117	5.21396	-0.262789	CHEMBL5124717	CHEMBL5124717	TRUE
Cc1nn(-c2ccccc2)c2nc(-c3ccc(F)cc3)c(C#N)c(-c3ccccc3O)c12	Cc1nn(-c2ccccc2)c2nc(-c3ccc(Cl)cc3)c(C#N)c(-c3ccccc3O)c12	6.34486	6.6073	-0.262441	CHEMBL4671169	CHEMBL4671169	TRUE
COc1ccccc1Sc1c[nH]c2ccc(F)cc12	COc1ccccc1Sc1c[nH]c2ccc(Cl)cc12	4.49485	4.75696	-0.262112	CHEMBL4719139	CHEMBL4719139	TRUE
CC1(C)CCCC(C)(C2CCC3(C)C2C(O)CC2C4(C)CCC(=NNc5cccc(F)c5)C(C)(C)C4CCC23C)O1	CC1(C)CCCC(C)(C2CCC3(C)C2C(O)CC2C4(C)CCC(=NNc5cccc(Cl)c5)C(C)(C)C4CCC23C)O1	4.17393	4.43533	-0.261409	CHEMBL4704788	CHEMBL4704788	TRUE
O=C(c1ccc(-c2ccc(O)c(F)c2)s1)c1cc(F)c(F)c(O)c1F	O=C(c1ccc(-c2ccc(O)c(Cl)c2)s1)c1cc(F)c(F)c(O)c1F	8.50864	8.76955	-0.260913	CHEMBL4261347	CHEMBL4261347	TRUE
Cc1cccc(Cl)c1-n1cnc2nc(SCc3ccc(F)cc3)sc2c1=O	Cc1cccc(Cl)c1-n1cnc2nc(SCc3ccc(Cl)cc3)sc2c1=O	5.66354	5.92445	-0.260913	CHEMBL4309086	CHEMBL4309086	TRUE
O=C(c1ccc(-c2ccc(F)cc2)o1)n1cccn1	O=C(c1ccc(-c2ccc(Cl)cc2)o1)n1cccn1	4.9914	5.25181	-0.260412	CHEMBL3826277	CHEMBL3826277	TRUE
CN(C)CCN(C)Cc1ccccc1Sc1ccccc1F	CN(C)CCN(C)Cc1ccccc1Sc1ccccc1Cl	6.14874	6.40894	-0.260194	CHEMBL4026494	CHEMBL4026494	TRUE
Nc1ccc(NS(=O)(=O)c2ccc(F)cc2)cc1C(F)(F)F	Nc1ccc(NS(=O)(=O)c2ccc(Cl)cc2)cc1C(F)(F)F	5.05	5.31	-0.26	CHEMBL4704712	CHEMBL4704712	TRUE
COc1cccc2c1C=[N+](c1ccc(F)cc1)CC2	COc1cccc2c1C=[N+](c1ccc(Cl)cc1)CC2	3.94692	4.20691	-0.259987	CHEMBL4770654	CHEMBL4770654	TRUE
CNc1nc(-c2ccccc2)c(C#N)c(-c2cccc(F)c2)n1	CNc1nc(-c2ccccc2)c(C#N)c(-c2cccc(Cl)c2)n1	7.54516	7.8041	-0.258945	CHEMBL5044912	CHEMBL5044912	TRUE
COc1cc2c(cc1OC)C(=O)C(=Cc1ccc(N3CCN(c4ccc(F)cc4)CC3)cc1)C2	COc1cc2c(cc1OC)C(=O)C(=Cc1ccc(N3CCN(c4ccc(Cl)cc4)CC3)cc1)C2	6.27737	6.53611	-0.258741	CHEMBL3878278	CHEMBL3878278	TRUE
Cc1ccn2c(=O)cc(CSc3nnc(NC(=O)Nc4ccc(C)c(F)c4)s3)nc2c1	Cc1ccn2c(=O)cc(CSc3nnc(NC(=O)Nc4ccc(C)c(Cl)c4)s3)nc2c1	7.15927	7.41794	-0.25867	CHEMBL4308448	CHEMBL4308448	TRUE
C=CC(=O)Nc1cccc(Nc2nc(Nc3ccc4c(c3)B(O)OC4)ncc2F)c1	C=CC(=O)Nc1cccc(Nc2nc(Nc3ccc4c(c3)B(O)OC4)ncc2Cl)c1	8.07058	8.3279	-0.257321	CHEMBL4610787	CHEMBL4610787	TRUE
Cc1cnc(Nc2ccc(C#N)cc2)nc1OCC(=O)Nc1ccccc1F	Cc1cnc(Nc2ccc(C#N)cc2)nc1OCC(=O)Nc1ccccc1Cl	7.08092	7.33724	-0.25632	CHEMBL3399856	CHEMBL3399856	TRUE
Cc1cnc(Nc2ccc(C#N)cc2)nc1OCC(=O)Nc1ccccc1F	Cc1cnc(Nc2ccc(C#N)cc2)nc1OCC(=O)Nc1ccccc1Cl	7.08092	7.33724	-0.25632	CHEMBL3399856	CHEMBL3399856	TRUE
O=C(COc1cc(O)c2c(=O)cc(-c3ccccc3)oc2c1)OCc1cc(-c2ccc(F)cc2)n(-c2ccccc2)n1	O=C(COc1cc(O)c2c(=O)cc(-c3ccccc3)oc2c1)OCc1cc(-c2ccc(Cl)cc2)n(-c2ccccc2)n1	5.59517	5.85078	-0.255615	CHEMBL4234507	CHEMBL4234507	TRUE
O=S(=O)(C=Cc1ccncc1)c1cccc(F)c1	O=S(=O)(C=Cc1ccncc1)c1cccc(Cl)c1	6.02228	6.27737	-0.25509	CHEMBL4712767	CHEMBL4712767	TRUE
CN1CC2C(=O)N(c3ccc(F)cc3)C(=O)C2C12C(=O)c1ccccc1C2=O	CN1CC2C(=O)N(c3ccc(Cl)cc3)C(=O)C2C12C(=O)c1ccccc1C2=O	4.29999	4.55502	-0.25503	CHEMBL4022474	CHEMBL4022474	TRUE
Cc1c(C(C#N)c2cc(F)cc(F)c2)nc(SC(C)C)[nH]c1=O	Cc1c(C(C#N)c2cc(F)cc(Cl)c2)nc(SC(C)C)[nH]c1=O	5.89008	6.14509	-0.255003	CHEMBL5140369	CHEMBL5140369	TRUE
C=CC(=O)Nc1nc(-c2ccccc2F)cs1	C=CC(=O)Nc1nc(-c2ccccc2Cl)cs1	5.80134	6.05552	-0.254174	CHEMBL4401249	CHEMBL4401249	TRUE
O=C(NCc1cccc(OCCCOc2nc[nH]n2)c1)c1nc2scc(-c3cccc(F)c3)c2c(=O)[nH]1	O=C(NCc1cccc(OCCCOc2nc[nH]n2)c1)c1nc2scc(-c3cccc(Cl)c3)c2c(=O)[nH]1	9.85387	10.1079	-0.254033	CHEMBL4000924	CHEMBL4000924	TRUE
O=S(=O)(C=Cc1ccccn1)c1ccc(F)cc1	O=S(=O)(C=Cc1ccccn1)c1ccc(Cl)cc1	5.50836	5.76145	-0.253094	CHEMBL4712767	CHEMBL4712767	TRUE
CN1Cc2cc(-c3ccc(-c4cncc(NS(=O)(=O)c5ccc(F)cc5)c4)s3)ccc2C1=O	CN1Cc2cc(-c3ccc(-c4cncc(NS(=O)(=O)c5ccc(Cl)cc5)c4)s3)ccc2C1=O	5.01547	5.26841	-0.252939	CHEMBL4130818	CHEMBL4130818	TRUE
Cc1cc(F)ccc1-c1cccc(COc2ccc(C(CC(=O)O)c3nccn3C)cc2)c1	Cc1cc(Cl)ccc1-c1cccc(COc2ccc(C(CC(=O)O)c3nccn3C)cc2)c1	7.22915	7.48149	-0.252338	CHEMBL3755626	CHEMBL3755626	TRUE
O=C(CN(Cc1ccccc1)c1ccc(Cl)cc1)N1CCN(c2ccc(F)cc2)CC1	O=C(CN(Cc1ccccc1)c1ccc(Cl)cc1)N1CCN(c2ccc(Cl)cc2)CC1	4.24995	4.50197	-0.252011	CHEMBL3871047	CHEMBL3871047	TRUE
Cc1cc(N2CCCCc3cc(F)ccc32)cc(C)c1NC(=O)CC(C)(C)C	Cc1cc(N2CCCCc3cc(Cl)ccc32)cc(C)c1NC(=O)CC(C)(C)C	6.60206	6.85387	-0.251812	CHEMBL4235019	CHEMBL4235019	TRUE
COc1cnc2ccc(=O)n(CCN3CCC(NC(=S)Nc4ccc(F)cc4)CC3)c2c1	COc1cnc2ccc(=O)n(CCN3CCC(NC(=S)Nc4ccc(Cl)cc4)CC3)c2c1	5.38722	5.63827	-0.251056	CHEMBL3364655	CHEMBL3364655	TRUE
Cc1ccc2occ(C=Nc3cc(F)ccc3O)c(=O)c2c1	Cc1ccc2occ(C=Nc3cc(Cl)ccc3O)c(=O)c2c1	5.4168	5.66756	-0.25076	CHEMBL4055293	CHEMBL4055293	TRUE
Cc1ccc(C(=O)N2CCC(O)C2)c(OCC(O)CN2CCC3(CC2)Cc2cc(F)ccc2O3)c1	Cc1ccc(C(=O)N2CCC(O)C2)c(OCC(O)CN2CCC3(CC2)Cc2cc(Cl)ccc2O3)c1	8.05061	8.30103	-0.25042	CHEMBL2396023	CHEMBL2396023	TRUE
O=C(O)C1CCN(CCON=Cc2ccccc2-c2ccc(F)cc2Cl)C1	O=C(O)C1CCN(CCON=Cc2ccccc2-c2ccc(Cl)cc2Cl)C1	6.16	6.40999	-0.249994	CHEMBL4342202	CHEMBL4342202	TRUE
O=C(O)CC(NC(=O)C1CCN(C(=O)Oc2ccccc2F)CC1)C(=O)COc1c(F)c(F)cc(F)c1F	O=C(O)CC(NC(=O)C1CCN(C(=O)Oc2ccccc2Cl)CC1)C(=O)COc1c(F)c(F)cc(F)c1F	7.79588	8.04576	-0.249877	CHEMBL4223549	CHEMBL4223549	TRUE
CC(=O)Nc1ccc(O)cc1OCC(N)CN1CCC2(CC1)Cc1cc(F)ccc1O2	CC(=O)Nc1ccc(O)cc1OCC(N)CN1CCC2(CC1)Cc1cc(Cl)ccc1O2	8.85387	9.10237	-0.248501	CHEMBL2340879	CHEMBL2340879	TRUE
Cn1cc(C(=O)Nc2ccc3oc(SCc4ccc(F)cc4)nc3c2)c(C(F)F)n1	Cn1cc(C(=O)Nc2ccc3oc(SCc4ccc(Cl)cc4)nc3c2)c(C(F)F)n1	6.99568	7.24413	-0.248447	CHEMBL3418823	CHEMBL3418823	TRUE
O=C(COc1ccccc1F)NCCc1nc2ccccc2[nH]1	O=C(COc1ccccc1Cl)NCCc1nc2ccccc2[nH]1	5.27572	5.52288	-0.247155	CHEMBL3243043	CHEMBL3243043	TRUE
O=C(Nc1cccc(C(=O)Nc2ccc3[nH]ncc3c2)c1)c1cccc(F)c1	O=C(Nc1cccc(C(=O)Nc2ccc3[nH]ncc3c2)c1)c1cccc(Cl)c1	5.05998	5.30627	-0.246291	CHEMBL4222975	CHEMBL4222975	TRUE
CC(N1CN(C2c3ccc(F)cc3CSc3ccccc32)n2ccc(=O)c(O)c2C1=O)C(F)(F)F	CC(N1CN(C2c3ccc(Cl)cc3CSc3ccccc32)n2ccc(=O)c(O)c2C1=O)C(F)(F)F	7.91009	8.15552	-0.245428	CHEMBL4702192	CHEMBL4702192	TRUE
O=C(C=Cc1cccc(F)c1)c1ccc2ccccc2c1O	O=C(C=Cc1cccc(Cl)c1)c1ccc2ccccc2c1O	7.08672	7.33161	-0.244898	CHEMBL4334805	CHEMBL4334805	TRUE
CCCCCCCCS(=O)(=O)Nc1cc(-c2ccccc2F)ccc1C(=O)O	CCCCCCCCS(=O)(=O)Nc1cc(-c2ccccc2Cl)ccc1C(=O)O	4.32606	4.57025	-0.24419	CHEMBL3583672	CHEMBL3583672	TRUE
CNCc1cc(-c2cccnc2F)n(S(=O)(=O)c2cccnc2)c1	CNCc1cc(-c2cccnc2Cl)n(S(=O)(=O)c2cccnc2)c1	6.67778	6.92082	-0.243038	CHEMBL4021482	CHEMBL4021482	TRUE
Cc1noc(C)c1-c1cc(F)c(Nc2ccccc2C(=O)O)c(Cl)c1	Cc1noc(C)c1-c1cc(Cl)c(Nc2ccccc2C(=O)O)c(Cl)c1	6.1549	6.39794	-0.243038	CHEMBL5125060	CHEMBL5125060	TRUE
CCC(Nc1nc(N)nc(N)c1C#N)c1nn(-c2cccnc2)c2cc(F)ccc12	CCC(Nc1nc(N)nc(N)c1C#N)c1nn(-c2cccnc2)c2cc(Cl)ccc12	8.67778	8.92082	-0.243038	CHEMBL5159594	CHEMBL5159594	TRUE
NS(=O)(=O)c1ccc(-n2nnc(CO)c2-c2ccc(F)cc2)cc1	NS(=O)(=O)c1ccc(-n2nnc(CO)c2-c2ccc(Cl)cc2)cc1	7.28567	7.52871	-0.243038	CHEMBL4231386	CHEMBL4231386	TRUE
CCN(Cc1ccc(F)cc1)Cc1nn(-c2ccccc2F)c2c1CCS(=O)(=O)O2	CCN(Cc1ccc(Cl)cc1)Cc1nn(-c2ccccc2F)c2c1CCS(=O)(=O)O2	7.1549	7.39794	-0.243038	CHEMBL4708126	CHEMBL4708126	TRUE
Cc1ccc(-c2cc3c(NC(Cc4cccc(F)c4)P(=O)(O)O)ncnc3s2)cc1F	Cc1ccc(-c2cc3c(NC(Cc4cccc(F)c4)P(=O)(O)O)ncnc3s2)cc1Cl	5.82391	6.0655	-0.241593	CHEMBL4006785	CHEMBL4006785	TRUE
O=C(c1ccc(-c2ccc(F)cc2)o1)N1CCCc2ccccc21	O=C(c1ccc(-c2ccc(Cl)cc2)o1)N1CCCc2ccccc21	5.21467	5.45593	-0.241262	CHEMBL4266761	CHEMBL4266761	TRUE
COc1ccc(C=Cc2ccccc2F)cc1	COc1ccc(C=Cc2ccccc2Cl)cc1	5.26761	5.50864	-0.241032	CHEMBL3879610	CHEMBL3879610	TRUE
O=C(Nc1ccc(F)cc1)Nc1nc(-c2cc3cc(Br)ccc3o2)cs1	O=C(Nc1ccc(Cl)cc1)Nc1nc(-c2cc3cc(Br)ccc3o2)cs1	4.19165	4.43262	-0.240967	CHEMBL3619984	CHEMBL3619984	TRUE
CC1(C(=O)NC(Cc2ccc(NC(=O)c3c(Cl)cccc3Cl)cc2)C(=O)O)CC(c2ccccc2F)=NO1	CC1(C(=O)NC(Cc2ccc(NC(=O)c3c(Cl)cccc3Cl)cc2)C(=O)O)CC(c2ccccc2Cl)=NO1	5.92082	6.16115	-0.240332	CHEMBL2394665	CHEMBL2394665	TRUE
CN(Cc1ncc(Cl)s1)c1cc2cnsc2cc1F	CN(Cc1ncc(Cl)s1)c1cc2cnsc2cc1Cl	5.55	5.79	-0.24	CHEMBL4824105	CHEMBL4824105	TRUE
CC(c1ccc(F)cc1)N1CCC(CCC(N)=O)(c2ccc(F)cc2)OC1=O	CC(c1ccc(Cl)cc1)N1CCC(CCC(N)=O)(c2ccc(F)cc2)OC1=O	7.64975	7.88941	-0.239658	CHEMBL4036190	CHEMBL4036190	TRUE
N#CC1=C(c2ccc(F)cc2)CC(c2ccc(OCCCC(F)(F)F)cc2)(C(F)(F)F)NC1=O	N#CC1=C(c2ccc(Cl)cc2)CC(c2ccc(OCCCC(F)(F)F)cc2)(C(F)(F)F)NC1=O	6.21325	6.45223	-0.238977	CHEMBL4845049	CHEMBL4845049	TRUE
COc1cc(-c2nc3ccc(F)cn3c2NC2CCCCC2)ccc1OCCCNC(=O)Nc1ccc(C(F)(F)F)cc1	COc1cc(-c2nc3ccc(Cl)cn3c2NC2CCCCC2)ccc1OCCCNC(=O)Nc1ccc(C(F)(F)F)cc1	7.284	7.52288	-0.238882	CHEMBL2344666	CHEMBL2344666	TRUE
O=C(c1ccc(F)cc1Cl)c1c[nH]c2ncc(-c3cnn(C4CCNCC4)c3)cc12	O=C(c1ccc(Cl)cc1Cl)c1c[nH]c2ncc(-c3cnn(C4CCNCC4)c3)cc12	7.88606	8.12494	-0.238882	CHEMBL3598610	CHEMBL3598610	TRUE
CC(C)c1cc(CNC(=O)c2ccc(F)c(OC3CCN(C)CC3)c2)on1	CC(C)c1cc(CNC(=O)c2ccc(Cl)c(OC3CCN(C)CC3)c2)on1	6.33068	6.56864	-0.237953	CHEMBL3860689	CHEMBL3860689	TRUE
O=C(NN=Cc1ccc(F)cc1)c1ccc(CN2CCCC(O)C2)cc1	O=C(NN=Cc1ccc(Cl)cc1)c1ccc(CN2CCCC(O)C2)cc1	4.87257	5.11014	-0.237567	CHEMBL4148261	CHEMBL4148261	TRUE
CCCCCn1cc(-c2ccccc2F)nc1N	CCCCCn1cc(-c2ccccc2Cl)nc1N	5.62893	5.86646	-0.237529	CHEMBL4765504	CHEMBL4765504	TRUE
Cc1ncc(-c2ccnc(-c3cccnc3)c2)c(-c2ccc(F)cc2Cl)n1	Cc1ncc(-c2ccnc(-c3cccnc3)c2)c(-c2ccc(Cl)cc2Cl)n1	6.24413	6.48149	-0.237361	CHEMBL3399440	CHEMBL3399440	TRUE
OCC1OC(n2cc(F)c3c(-c4ccco4)ncnc32)C(O)C1O	OCC1OC(n2cc(Cl)c3c(-c4ccco4)ncnc32)C(O)C1O	6.72125	6.95861	-0.237361	CHEMBL3135672	CHEMBL3135672	TRUE
C=C(C)C1CCC(C)=CC1c1c(O)cc(CCCCC)cc1OC(=O)N(C)Cc1cccc(F)c1	C=C(C)C1CCC(C)=CC1c1c(O)cc(CCCCC)cc1OC(=O)N(C)Cc1cccc(Cl)c1	5.31247	5.54975	-0.23728	CHEMBL4832641	CHEMBL4832641	TRUE
CC1C(=O)N(C)c2ccc(C(=O)Nc3ccc(F)cc3)cc2N1C1CC1	CC1C(=O)N(C)c2ccc(C(=O)Nc3ccc(Cl)cc3)cc2N1C1CC1	6.734	6.96859	-0.234588	CHEMBL4198470	CHEMBL4198470	TRUE
O=C(NCc1ccc(F)cc1)C1C(=O)N(O)C(=O)c2cc(F)ccc21	O=C(NCc1ccc(F)cc1)C1C(=O)N(O)C(=O)c2cc(Cl)ccc21	6.61979	6.85387	-0.234083	CHEMBL3294150	CHEMBL3294150	TRUE
CCc1cc(Nc2nc(NC(C)c3ccc(F)cc3)nc3ccccc23)n[nH]1	CCc1cc(Nc2nc(NC(C)c3ccc(Cl)cc3)nc3ccccc23)n[nH]1	6.92082	7.1549	-0.234083	CHEMBL4810421	CHEMBL4810421	TRUE
Cn1nc(-c2ccccc2F)cc1Nc1cc(O)cc(O)c1C(=O)N1Cc2ccccc2C1	Cn1nc(-c2ccccc2Cl)cc1Nc1cc(O)cc(O)c1C(=O)N1Cc2ccccc2C1	6.74473	6.97881	-0.234083	CHEMBL4834529	CHEMBL4834529	TRUE
N#CN=C1SCCN1C(=O)c1coc(-c2ccc(F)cc2)n1	N#CN=C1SCCN1C(=O)c1coc(-c2ccc(Cl)cc2)n1	4.33819	4.57187	-0.233678	CHEMBL4775064	CHEMBL4775064	TRUE
O=C(c1ccc(F)c(F)c1)N1CCN(c2cc(=O)[nH]c(=O)n2Cc2ccc(OS(=O)(=O)c3cccc4cnccc34)cc2)CC1	O=C(c1ccc(Cl)c(F)c1)N1CCN(c2cc(=O)[nH]c(=O)n2Cc2ccc(OS(=O)(=O)c3cccc4cnccc34)cc2)CC1	6.77211	7.00436	-0.232252	CHEMBL3745026	CHEMBL3745026	TRUE
N#Cc1ccc(-c2cnn3c2CCC3)c(F)c1	N#Cc1ccc(-c2cnn3c2CCC3)c(Cl)c1	8.03621	8.26761	-0.231394	CHEMBL4124785	CHEMBL4124785	TRUE
NC1CCC(Nc2ccc3ncc(-c4ccc(Nc5ncc(F)cc5F)cc4)n3n2)CC1	NC1CCC(Nc2ccc3ncc(-c4ccc(Nc5ncc(Cl)cc5F)cc4)n3n2)CC1	7.76955	8	-0.230449	CHEMBL3265824	CHEMBL3265824	TRUE
CCCCNc1nc(N)nc(C)c1F	CCCCNc1nc(N)nc(C)c1Cl	4.46852	4.69897	-0.230449	CHEMBL4429195	CHEMBL4429195	TRUE
CC(C)(C)NC(=O)C(c1c(C(=O)O)[nH]c2cc(Cl)ccc12)N(C=O)Cc1ccc(OCc2ccc(F)cc2)cc1	CC(C)(C)NC(=O)C(c1c(C(=O)O)[nH]c2cc(Cl)ccc12)N(C=O)Cc1ccc(OCc2ccc(Cl)cc2)cc1	5.9914	6.22185	-0.230449	CHEMBL4362816	CHEMBL4362816	TRUE
O=C(O)C1CCCN(CCON=Cc2ccccc2-c2ccc(F)cc2Cl)C1	O=C(O)C1CCCN(CCON=Cc2ccccc2-c2ccc(Cl)cc2Cl)C1	8	8.23003	-0.230032	CHEMBL4401746	CHEMBL4401746	TRUE
Cc1ccc(Oc2ccc(-c3ccn4c(CC5CC5)nnc4c3C(F)(F)F)cc2F)c(C)n1	Cc1ccc(Oc2ccc(-c3ccn4c(CC5CC5)nnc4c3C(F)(F)F)cc2Cl)c(C)n1	8.59007	8.81987	-0.229807	CHEMBL4040510	CHEMBL4040510	TRUE
Cc1n[nH]c2c1C(c1ccc(F)c(F)c1)c1c(C)n[nH]c1O2	Cc1n[nH]c2c1C(c1ccc(F)c(Cl)c1)c1c(C)n[nH]c1O2	6.35556	6.58503	-0.229465	CHEMBL3867377	CHEMBL3867377	TRUE
COc1ccc(-c2nc3cc(F)ccc3[nH]2)c(Cl)c1OC	COc1ccc(-c2nc3cc(Cl)ccc3[nH]2)c(Cl)c1OC	5.59176	5.82102	-0.229263	CHEMBL4198674	CHEMBL4198674	TRUE
Cc1occc(=O)c1OCC(=O)N1CCN(c2cccc(F)c2)CC1	Cc1occc(=O)c1OCC(=O)N1CCN(c2cccc(Cl)c2)CC1	5	5.22915	-0.229148	CHEMBL4708690	CHEMBL4708690	TRUE
Cn1c(=NOCc2ccc(F)cc2)ccn(C2OC(COP(=O)(O)CP(=O)(O)O)C(O)C2O)c1=O	Cn1c(=NOCc2ccc(Cl)cc2)ccn(C2OC(COP(=O)(O)CP(=O)(O)O)C(O)C2O)c1=O	8.9431	9.17198	-0.22889	CHEMBL5041876	CHEMBL5041876	TRUE
O=S(=O)(C=Cc1ccccn1)c1ccccc1F	O=S(=O)(C=Cc1ccccn1)c1ccccc1Cl	5.98047	6.20901	-0.228543	CHEMBL4712767	CHEMBL4712767	TRUE
CN(C)CCCC1(c2ccc(F)cc2)OCc2cc(-c3nnc(-c4cccc(F)c4)[nH]3)ccc21	CN(C)CCCC1(c2ccc(F)cc2)OCc2cc(-c3nnc(-c4cccc(Cl)c4)[nH]3)ccc21	4.34843	4.57626	-0.227831	CHEMBL3607423	CHEMBL3607423	TRUE
CN(C)CCCC1(c2ccc(F)cc2)OCc2cc(-c3nnc(-c4cccc(F)c4)[nH]3)ccc21	CN(C)CCCC1(c2ccc(F)cc2)OCc2cc(-c3nnc(-c4cccc(Cl)c4)[nH]3)ccc21	4.34843	4.57626	-0.227831	CHEMBL3607423	CHEMBL3607423	TRUE
Cc1cc(CC(NC(=O)N2CCN(c3ccc(F)cc3)CC2)C(=O)N2CCC(N3CCCCC3)CC2)cc2cn[nH]c12	Cc1cc(CC(NC(=O)N2CCN(c3ccc(Cl)cc3)CC2)C(=O)N2CCC(N3CCCCC3)CC2)cc2cn[nH]c12	6.88606	7.11351	-0.227453	CHEMBL3773899	CHEMBL3773899	TRUE
O=C(Cc1ccc(F)cc1)c1sc2ncccc2c1-c1ccc(F)cc1	O=C(Cc1ccc(F)cc1)c1sc2ncccc2c1-c1ccc(Cl)cc1	6.85387	7.08092	-0.22705	CHEMBL3367596	CHEMBL3367596	TRUE
CN(Cc1cc(=O)[nH][nH]1)c1ccc(F)cc1	CN(Cc1cc(=O)[nH][nH]1)c1ccc(Cl)cc1	5.85387	6.08092	-0.22705	CHEMBL2330283	CHEMBL2330283	TRUE
CN(C)CC1CCc2cc(-c3ccccc3F)ccc2C1(O)c1cccc(O)c1	CN(C)CC1CCc2cc(-c3ccccc3Cl)ccc2C1(O)c1cccc(O)c1	5.79588	6.02228	-0.226396	CHEMBL3812008	CHEMBL3812008	TRUE
Fc1ccc(NCc2coc(/C=C/c3ccc(C(F)(F)F)cc3)n2)cc1	FC(F)(F)c1ccc(/C=C/c2nc(CNc3ccc(Cl)cc3)co2)cc1	5.66354	5.88941	-0.22587	CHEMBL5122916	CHEMBL5122916	TRUE
Cc1nccc(N2CCc3nc(C4(C(=O)Nc5ccc(F)cc5)CCC4)ccc32)n1	Cc1nccc(N2CCc3nc(C4(C(=O)Nc5ccc(Cl)cc5)CCC4)ccc32)n1	7.67778	7.90309	-0.225309	CHEMBL4813761	CHEMBL4813761	TRUE
COc1cccc(-c2cn3cccc(-c4ccc(F)cc4)c3n2)c1	COc1cccc(-c2cn3cccc(-c4ccc(Cl)cc4)c3n2)c1	5.14267	5.36653	-0.223864	CHEMBL4606690	CHEMBL4606690	TRUE
COc1cc2ncnc(Nc3ccc(F)cc3)c2cc1OCCCCCC(=O)NO	COc1cc2ncnc(Nc3ccc(Cl)cc3)c2cc1OCCCCCC(=O)NO	6.28067	6.50446	-0.223787	CHEMBL3762407	CHEMBL3762407	TRUE
CNC(=O)C12CC1C(n1cnc3c(NC)nc(C#Cc4ccccc4F)nc31)C(O)C2O	CNC(=O)C12CC1C(n1cnc3c(NC)nc(C#Cc4ccccc4Cl)nc31)C(O)C2O	9.01323	9.23657	-0.223344	CHEMBL3413616	CHEMBL3413616	TRUE
COc1ccc2ccc3c(c2c1)CC(N)C(c1ccccc1F)O3	COc1ccc2ccc3c(c2c1)CC(N)C(c1ccccc1Cl)O3	6.2488	6.47134	-0.222542	CHEMBL3862754	CHEMBL3862754	TRUE
O=C(O)COc1ccc(C=C2C(=O)N(c3ccc(F)cc3)N=C2c2ccccc2)c(OCC(=O)O)c1	O=C(O)COc1ccc(C=C2C(=O)N(c3ccc(Cl)cc3)N=C2c2ccccc2)c(OCC(=O)O)c1	4.74618	4.96859	-0.222414	CHEMBL4771698	CHEMBL4771698	TRUE
O=C(Nc1ccc(OCCN2CCOCC2)c(F)c1)c1cccc(-c2cccc(O)c2)c1	O=C(Nc1ccc(OCCN2CCOCC2)c(Cl)c1)c1cccc(-c2cccc(O)c2)c1	6.88857	7.11098	-0.222409	CHEMBL3399480	CHEMBL3399480	TRUE
O=C(Nc1ccc(OCCN2CCOCC2)c(F)c1)c1cccc(-c2cccc(O)c2)c1	O=C(Nc1ccc(OCCN2CCOCC2)c(Cl)c1)c1cccc(-c2cccc(O)c2)c1	6.88857	7.11098	-0.222409	CHEMBL3399480	CHEMBL3399480	TRUE
Fc1ccc2nc(-c3cccc(Oc4ccccc4)c3)cc(-c3ccccc3)c2c1	Clc1ccc2nc(-c3cccc(Oc4ccccc4)c3)cc(-c3ccccc3)c2c1	9.44733	9.66959	-0.222254	CHEMBL3879356	CHEMBL3879356	TRUE
CCOC(=O)C1=C(CN2CCOCC2)NC(c2nccs2)=NC1c1ccc(F)cc1Cl	CCOC(=O)C1=C(CN2CCOCC2)NC(c2nccs2)=NC1c1ccc(Cl)cc1Cl	8.30103	8.52288	-0.221849	CHEMBL4177855	CHEMBL4177855	TRUE
O=C(O)C(Cc1ccc(F)cc1)=NO	O=C(O)C(Cc1ccc(Cl)cc1)=NO	6.52288	6.74473	-0.221849	CHEMBL3804623	CHEMBL3804623	TRUE
O=C(CCOc1cccc(F)c1)NO	O=C(CCOc1cccc(Cl)c1)NO	5.68825	5.91009	-0.221849	CHEMBL4233573	CHEMBL4233573	TRUE
CCCCCNC(c1c(C(=O)O)[nH]c2cc(Cl)ccc12)c1nnnn1Cc1ccc(OCc2ccccc2F)cc1	CCCCCNC(c1c(C(=O)O)[nH]c2cc(Cl)ccc12)c1nnnn1Cc1ccc(OCc2ccccc2Cl)cc1	7.30103	7.52288	-0.221849	CHEMBL4003037	CHEMBL4003037	TRUE
O=C(Cc1nc(N2CCOCC2)cc(=O)[nH]1)N1CCc2c(F)cccc21	O=C(Cc1nc(N2CCOCC2)cc(=O)[nH]1)N1CCc2c(Cl)cccc21	8.30103	8.52288	-0.221849	CHEMBL3119743	CHEMBL3119743	TRUE
NC(=O)c1cnc2cc(F)c(-c3cccnc3)cc2c1NC1CCOCC1	NC(=O)c1cnc2cc(Cl)c(-c3cccnc3)cc2c1NC1CCOCC1	5.69897	5.92082	-0.221849	CHEMBL4478172	CHEMBL4478172	TRUE
CN1c2ccc(-c3cncc(F)c3N3CCC4(CCNC4=O)CC3)cc2CS1(=O)=O	CN1c2ccc(-c3cncc(Cl)c3N3CCC4(CCNC4=O)CC3)cc2CS1(=O)=O	8.52288	8.74473	-0.221849	CHEMBL3803437	CHEMBL3803437	TRUE
Cc1nc(C2OC(CO)C(O)C(n3cc(-c4cc(F)c(F)c(F)c4)nn3)C2O)n(-c2cc(Cl)ccc2F)n1	Cc1nc(C2OC(CO)C(O)C(n3cc(-c4cc(F)c(F)c(F)c4)nn3)C2O)n(-c2cc(Cl)ccc2Cl)n1	7.18709	7.40894	-0.221849	CHEMBL5126288	CHEMBL5126288	TRUE
O=c1nc(NN=Cc2ccc(F)cc2)c2cn[nH]c2[nH]1	O=c1nc(NN=Cc2ccc(Cl)cc2)c2cn[nH]c2[nH]1	6.42829	6.64975	-0.221461	CHEMBL4054662	CHEMBL4054662	TRUE
O=C1C(Cl)=C(N2CCOCC2)C(=O)N1c1ccc(F)c(F)c1	O=C1C(Cl)=C(N2CCOCC2)C(=O)N1c1ccc(Cl)c(F)c1	4.88074	5.10182	-0.221079	CHEMBL2319671	CHEMBL2319671	TRUE
O=C1NC(=Nc2nnc(-c3ccc(Cl)cc3)s2)SC1=Cc1ccccc1F	O=C1NC(=Nc2nnc(-c3ccc(Cl)cc3)s2)SC1=Cc1ccccc1Cl	4.25026	4.47108	-0.22082	CHEMBL2438384	CHEMBL2438384	TRUE
O=C(Nc1ccc(F)c(Cl)c1)c1cc(Cl)ccc1O	O=C(Nc1ccc(Cl)c(Cl)c1)c1cc(Cl)ccc1O	5.91721	6.13668	-0.219463	CHEMBL3606286	CHEMBL3606286	TRUE
O=C(Nc1ccc(F)c(Cl)c1)c1cc(Cl)ccc1O	O=C(Nc1ccc(Cl)c(Cl)c1)c1cc(Cl)ccc1O	5.91721	6.13668	-0.219463	CHEMBL3606286	CHEMBL3606286	TRUE
NC(Cc1c[nH]c2ccccc12)C(=O)NC1CCN(Cc2c[nH]c3ccc(F)cc23)CC1	NC(Cc1c[nH]c2ccccc12)C(=O)NC1CCN(Cc2c[nH]c3ccc(Cl)cc23)CC1	4.7986	5.01773	-0.219126	CHEMBL4137131	CHEMBL4137131	TRUE
O=C(O)c1cnc(-c2ccc(OCc3cccc(F)c3)c(-n3ccnn3)c2)[nH]c1=O	O=C(O)c1cnc(-c2ccc(OCc3cccc(Cl)c3)c(-n3ccnn3)c2)[nH]c1=O	7.32148	7.54061	-0.219126	CHEMBL4407808	CHEMBL4407808	TRUE
O=S(=O)(C=Cc1ccc(Cl)cn1)c1cccc(F)c1	O=S(=O)(C=Cc1ccc(Cl)cn1)c1cccc(Cl)c1	5.60154	5.82045	-0.218909	CHEMBL4712767	CHEMBL4712767	TRUE
COc1ncc(-c2ccc3nccc(=O)n3c2)cc1NS(=O)(=O)c1ccc(F)cc1	COc1ncc(-c2ccc3nccc(=O)n3c2)cc1NS(=O)(=O)c1ccc(Cl)cc1	7.09313	7.31158	-0.218454	CHEMBL4255943	CHEMBL4255943	TRUE
O=C(CN1C(=O)SC(=Cc2ccc(F)cc2)C1=O)Nc1ccccc1	O=C(CN1C(=O)SC(=Cc2ccc(Cl)cc2)C1=O)Nc1ccccc1	6.85387	7.07099	-0.217118	CHEMBL4314448	CHEMBL4314448	TRUE
O=C(O)CNC(=O)c1ncc(-c2cn(Cc3ccc(F)cc3)nn2)cc1O	O=C(O)CNC(=O)c1ncc(-c2cn(Cc3ccc(Cl)cc3)nn2)cc1O	6.42551	6.64168	-0.216179	CHEMBL4124444	CHEMBL4124444	TRUE
CSc1ncc2c(n1)Nc1n[nH]c(C)c1N=C2c1cccc(F)c1	CSc1ncc2c(n1)Nc1n[nH]c(C)c1N=C2c1cccc(Cl)c1	6.77728	6.99311	-0.215823	CHEMBL4268022	CHEMBL4268022	TRUE
Nc1ncnc2c1nc(NCc1ccc(F)cc1)n2C1OC(CO)C(O)C1O	Nc1ncnc2c1nc(NCc1ccc(Cl)cc1)n2C1OC(CO)C(O)C1O	6.33724	6.55284	-0.2156	CHEMBL3825930	CHEMBL3825930	TRUE
O=C(NC1CCN(C(=O)c2cc(-c3ccc(F)cc3)[nH]n2)C1)C1CC1	O=C(NC1CCN(C(=O)c2cc(-c3ccc(Cl)cc3)[nH]n2)C1)C1CC1	6.83565	7.05061	-0.214963	CHEMBL5111478	CHEMBL5111478	TRUE
Cn1c(N2CCNC(c3ccc(F)cc3)C2)nc(-c2ccncc2)cc1=O	Cn1c(N2CCNC(c3ccc(Cl)cc3)C2)nc(-c2ccncc2)cc1=O	7.74473	7.95861	-0.21388	CHEMBL4057861	CHEMBL4057861	TRUE
O=C(NN=Cc1cccc(OCc2ccc(F)cc2)c1)c1cc(O)c(O)c(O)c1	O=C(NN=Cc1cccc(OCc2ccc(Cl)cc2)c1)c1cc(O)c(O)c(O)c1	4	4.21325	-0.213249	CHEMBL3816961	CHEMBL3816961	TRUE
COc1ccc(C(=O)Nc2ccc(C(=O)NN=C3C(=O)Nc4ccc(F)cc43)cc2)cc1	COc1ccc(C(=O)Nc2ccc(C(=O)NN=C3C(=O)Nc4ccc(Cl)cc43)cc2)cc1	5.52578	5.73755	-0.211765	CHEMBL4330587	CHEMBL4330587	TRUE
O=C(C=Cc1ccccc1F)c1ccc2ccccc2c1O	O=C(C=Cc1ccccc1Cl)c1ccc2ccccc2c1O	7.04479	7.25649	-0.211697	CHEMBL4334805	CHEMBL4334805	TRUE
Fc1ccc(-c2nn3c(-c4ccccn4)nnc3s2)cc1	Clc1ccc(-c2nn3c(-c4ccccn4)nnc3s2)cc1	6.47886	6.69037	-0.211508	CHEMBL4008373	CHEMBL4008373	TRUE
CCOc1ccc2cc(C3CC(c4ccc(-c5ccc(F)nc5)cc4)=NN3C(=O)CCCC(=O)O)c(Cl)nc2c1	CCOc1ccc2cc(C3CC(c4ccc(-c5ccc(Cl)nc5)cc4)=NN3C(=O)CCCC(=O)O)c(Cl)nc2c1	5.58503	5.79588	-0.210853	CHEMBL4618809	CHEMBL4618809	TRUE
COc1cc(C(=O)c2cn(-c3ccc(C)cc3)cc2-c2ccccc2F)cc(OC)c1OC	COc1cc(C(=O)c2cn(-c3ccc(C)cc3)cc2-c2ccccc2Cl)cc(OC)c1OC	6.10791	6.31876	-0.210853	CHEMBL4316276	CHEMBL4316276	TRUE
NS(=O)(=O)c1ccc(-n2nnc(C(=O)O)c2-c2ccc(F)cc2)cc1	NS(=O)(=O)c1ccc(-n2nnc(C(=O)O)c2-c2ccc(Cl)cc2)cc1	6.2119	6.42262	-0.210721	CHEMBL4231385	CHEMBL4231385	TRUE
Cn1ncc2cc(CN3CCC(OCc4ccc(F)c(F)c4)CC3)ccc21	Cn1ncc2cc(CN3CCC(OCc4ccc(Cl)c(F)c4)CC3)ccc21	6.56	6.77001	-0.210007	CHEMBL5145660	CHEMBL5145660	TRUE
Fc1cc(-c2ccn3c(CC4CC4)nnc3c2C(F)(F)F)ccc1NC1CC1	FC(F)(F)c1c(-c2ccc(NC3CC3)c(Cl)c2)ccn2c(CC3CC3)nnc12	8.43997	8.64995	-0.209972	CHEMBL4040510	CHEMBL4040510	TRUE
COc1nc(C2=NOCC(c3ccc(F)cc3)N2)ccc1-n1cnc(C)c1	COc1nc(C2=NOCC(c3ccc(Cl)cc3)N2)ccc1-n1cnc(C)c1	7.22185	7.4318	-0.20995	CHEMBL4839804	CHEMBL4839804	TRUE
O=C1NC(=O)C2(CCCc3ccccc32)N1S(=O)(=O)c1ccc(F)cc1	O=C1NC(=O)C2(CCCc3ccccc32)N1S(=O)(=O)c1ccc(Cl)cc1	5.20412	5.41341	-0.209293	CHEMBL4388099	CHEMBL4388099	TRUE
O=S(=O)(C1CC1)N1CCN(c2ccc(C=Cc3cc(F)cc(Cn4ccnc4)c3)cc2)CC1	O=S(=O)(C1CC1)N1CCN(c2ccc(C=Cc3cc(Cl)cc(Cn4ccnc4)c3)cc2)CC1	7.46852	7.67778	-0.20926	CHEMBL4124009	CHEMBL4124009	TRUE
O=C1CC(c2c[nH]c3cc(F)ccc23)C(=O)N1	O=C1CC(c2c[nH]c3cc(Cl)ccc23)C(=O)N1	5.46852	5.67778	-0.20926	CHEMBL4058731	CHEMBL4058731	TRUE
CCOC(=O)C1=C(C)NC2=C(C(=O)CC(C)(C)C2)C1c1ccc(-c2ccc(F)cc2)cc1	CCOC(=O)C1=C(C)NC2=C(C(=O)CC(C)(C)C2)C1c1ccc(-c2ccc(Cl)cc2)cc1	5.91009	6.11919	-0.209092	CHEMBL3413693	CHEMBL3413693	TRUE
NC(=O)c1c(NC(=O)c2ccc([N+](=O)[O-])s2)sc2c1CCN(C(=S)Nc1ccc(F)cc1)C2	NC(=O)c1c(NC(=O)c2ccc([N+](=O)[O-])s2)sc2c1CCN(C(=S)Nc1ccc(Cl)cc1)C2	4.99311	5.20204	-0.208934	CHEMBL3123111	CHEMBL3123111	TRUE
CC(NC(=O)c1ccnc(F)c1)C(=O)N1CCCC1B(O)O	CC(NC(=O)c1ccnc(Cl)c1)C(=O)N1CCCC1B(O)O	5.67778	5.88606	-0.208276	CHEMBL2346128	CHEMBL2346128	TRUE
Oc1ccccc1CNc1ccc(-c2ccc(F)cc2)cc1	Oc1ccccc1CNc1ccc(-c2ccc(Cl)cc2)cc1	5.41341	5.6216	-0.208189	CHEMBL3598345	CHEMBL3598345	TRUE
O=C(O)CCc1ccc2c(c1)c(CCc1ccccc1)cn2-c1ccc(F)cc1	O=C(O)CCc1ccc2c(c1)c(CCc1ccccc1)cn2-c1ccc(Cl)cc1	7.23657	7.4437	-0.207125	CHEMBL3361803	CHEMBL3361803	TRUE
O=C(O)CCNC(=S)NCCCNc1nc(NCc2ccccc2)ncc1F	O=C(O)CCNC(=S)NCCCNc1nc(NCc2ccccc2)ncc1Cl	4.808	5.015	-0.207	CHEMBL4830944	CHEMBL4830944	TRUE
O=C(O)CNC(=O)c1ncc(C2=CCN(S(=O)(=O)c3ccc(F)cc3)CC2)cc1O	O=C(O)CNC(=O)c1ncc(C2=CCN(S(=O)(=O)c3ccc(Cl)cc3)CC2)cc1O	7.36161	7.56815	-0.206543	CHEMBL5140300	CHEMBL5140300	TRUE
Cc1noc(Cn2nc3ccc(-c4ccc(Oc5ccc(F)cc5)cc4)cn3c2=O)n1	Cc1noc(Cn2nc3ccc(-c4ccc(Oc5ccc(Cl)cc5)cc4)cn3c2=O)n1	3.66756	3.8729	-0.205334	CHEMBL3813329	CHEMBL3813329	TRUE
O=c1cc2n(cc1O)CCN(Cc1c(F)cccc1Cl)C2	O=c1cc2n(cc1O)CCN(Cc1c(Cl)cccc1Cl)C2	7.79588	8	-0.20412	CHEMBL4411225	CHEMBL4411225	TRUE
Cc1ccc2c(c1)c(CN1CCCCC1)cn2Cc1ccc(F)cc1	Cc1ccc2c(c1)c(CN1CCCCC1)cn2Cc1ccc(Cl)cc1	5.31876	5.52288	-0.20412	CHEMBL4223739	CHEMBL4223739	TRUE
COc1nc(C2=NOC(C)C(c3ccc(Cl)c(F)c3)N2)ccc1-n1cnc(C)c1	COc1nc(C2=NOC(C)C(c3ccc(Cl)c(Cl)c3)N2)ccc1-n1cnc(C)c1	8.09691	8.30103	-0.20412	CHEMBL4839804	CHEMBL4839804	TRUE
CCN(Cc1ccccc1)Cc1nn(-c2ccccc2F)c2c1CCS(=O)(=O)O2	CCN(Cc1ccccc1)Cc1nn(-c2ccccc2Cl)c2c1CCS(=O)(=O)O2	7.09691	7.30103	-0.20412	CHEMBL4708126	CHEMBL4708126	TRUE
O=C(c1ccc(-c2ccc(F)cc2)o1)N1CCCc2ccccc21	O=C(c1ccc(-c2ccc(Cl)cc2)o1)N1CCCc2ccccc21	4.87943	5.08197	-0.202544	CHEMBL4153366	CHEMBL4153366	TRUE
O=c1[nH]c(=S)[nH]c2nc(-c3cccc(F)c3)nn12	O=c1[nH]c(=S)[nH]c2nc(-c3cccc(Cl)c3)nn12	4.31659	4.5187	-0.202108	CHEMBL2423138	CHEMBL2423138	TRUE
O=C(COc1ccc(S(=O)(=O)NCCc2ccccc2)cc1)Nc1ccc(F)cc1	O=C(COc1ccc(S(=O)(=O)NCCc2ccccc2)cc1)Nc1ccc(Cl)cc1	4.97881	5.18046	-0.201645	CHEMBL3614737	CHEMBL3614737	TRUE
O=C(COc1ccc(S(=O)(=O)NCCc2ccccc2)cc1)Nc1ccc(F)cc1	O=C(COc1ccc(S(=O)(=O)NCCc2ccccc2)cc1)Nc1ccc(Cl)cc1	4.97881	5.18046	-0.201645	CHEMBL3614737	CHEMBL3614737	TRUE
COc1ccc(N(Cc2cccc(F)c2)C(=O)NCCCn2cncc2C)cc1OC	COc1ccc(N(Cc2cccc(Cl)c2)C(=O)NCCCn2cncc2C)cc1OC	7.68825	7.88941	-0.201164	CHEMBL4376103	CHEMBL4376103	TRUE
CC(C)Oc1ccc(OCC2c3ccc(OC(C)C)cc3CCN2C(=O)c2cccc(F)c2)cc1	CC(C)Oc1ccc(OCC2c3ccc(OC(C)C)cc3CCN2C(=O)c2cccc(Cl)c2)cc1	5.56864	5.76955	-0.200915	CHEMBL4012829	CHEMBL4012829	TRUE
CN1CCN(C(=O)COc2ccc(C(=O)C=Cc3ccccc3F)cc2)CC1	CN1CCN(C(=O)COc2ccc(C(=O)C=Cc3ccccc3Cl)cc2)CC1	5.81248	6.01323	-0.200749	CHEMBL4315553	CHEMBL4315553	TRUE
O=C1CC(c2ccccc2)CC(O)=C1Sc1cccc(Cl)c1F	O=C1CC(c2ccccc2)CC(O)=C1Sc1cccc(Cl)c1Cl	4	4.20066	-0.200659	CHEMBL3369984	CHEMBL3369984	TRUE
Fc1ccc(-c2[nH]c3cc(F)ccc3c2Cn2ccnc2)cc1	Fc1ccc(-c2[nH]c3cc(Cl)ccc3c2Cn2ccnc2)cc1	7.29073	7.4908	-0.200067	CHEMBL4143196	CHEMBL4143196	TRUE
O=C(NCC1CCNCC1)c1nc2c(N3CCc4cc(F)ccc43)ncnc2s1	O=C(NCC1CCNCC1)c1nc2c(N3CCc4cc(Cl)ccc43)ncnc2s1	8.29999	8.50004	-0.200049	CHEMBL5137639	CHEMBL5137639	TRUE
COc1ccccc1Nc1ncc(F)c(-c2ccc(C(N)=O)c(C(C)C)c2)n1	COc1ccccc1Nc1ncc(Cl)c(-c2ccc(C(N)=O)c(C(C)C)c2)n1	5	5.2	-0.2	CHEMBL4121733	CHEMBL4121733	TRUE
O=C(CC1(O)CCC(Cc2ccc(F)cc2)CC1)Nc1ccc2[nH]c(=O)oc2c1	O=C(CC1(O)CCC(Cc2ccc(Cl)cc2)CC1)Nc1ccc2[nH]c(=O)oc2c1	7.40001	7.59998	-0.199973	CHEMBL4058410	CHEMBL4058410	TRUE
O=C(Nc1ccc2[nH]c(=O)oc2c1)C(=O)N1CCN(c2ccc(F)c(F)c2)CC1	O=C(Nc1ccc2[nH]c(=O)oc2c1)C(=O)N1CCN(c2ccc(Cl)c(F)c2)CC1	7.70006	7.89997	-0.199917	CHEMBL4321002	CHEMBL4321002	TRUE
Fc1ccc2[nH]cc(CCc3c[nH]c4ccccc34)c2c1	Clc1ccc2[nH]cc(CCc3c[nH]c4ccccc34)c2c1	4.70333	4.90309	-0.199755	CHEMBL3384034	CHEMBL3384034	TRUE
O=C1C(Cl)=C(N2CCOCC2)C(=O)N1c1ccc(F)c(F)c1	O=C1C(Cl)=C(N2CCOCC2)C(=O)N1c1ccc(F)c(Cl)c1	4.88074	5.07988	-0.199133	CHEMBL2319671	CHEMBL2319671	TRUE
Cc1nn2c(O)cc(C3CCN(C(=O)OCc4ccccc4)CC3)nc2c1-c1ccc(F)cc1	Cc1nn2c(O)cc(C3CCN(C(=O)OCc4ccccc4)CC3)nc2c1-c1ccc(Cl)cc1	5.48945	5.68825	-0.198791	CHEMBL4015193	CHEMBL4015193	TRUE
O=C(NCCCNc1nc2ccc(F)cc2c2[nH]c3ccccc3c12)Nc1ccccc1	O=C(NCCCNc1nc2ccc(Cl)cc2c2[nH]c3ccccc3c12)Nc1ccccc1	4.64397	4.84164	-0.197663	CHEMBL3268866	CHEMBL3268866	TRUE
CCn1c(=O)c(C(=O)Nc2nnc(-c3ccc(F)cc3)s2)c(O)c2ccccc21	CCn1c(=O)c(C(=O)Nc2nnc(-c3ccc(Cl)cc3)s2)c(O)c2ccccc21	5.63827	5.83565	-0.197375	CHEMBL4683292	CHEMBL4683292	TRUE
CC(N1CN(C2c3ccccc3CSc3ccc(F)cc32)n2ccc(=O)c(O)c2C1=O)C(F)(F)F	CC(N1CN(C2c3ccccc3CSc3ccc(Cl)cc32)n2ccc(=O)c(O)c2C1=O)C(F)(F)F	7.40671	7.6038	-0.197087	CHEMBL4702192	CHEMBL4702192	TRUE
O=C(c1ccc(-c2cccc(F)c2)o1)N1CCCc2ccccc21	O=C(c1ccc(-c2cccc(Cl)c2)o1)N1CCCc2ccccc21	4.56241	4.7592	-0.196793	CHEMBL4153366	CHEMBL4153366	TRUE
CN1CCN(c2nc(N)nc(Cc3ccccc3F)n2)CC1	CN1CCN(c2nc(N)nc(Cc3ccccc3Cl)n2)CC1	7.05552	7.25181	-0.196295	CHEMBL4035125	CHEMBL4035125	TRUE
CCOC(=O)N1CCC(=NNC(=O)c2ccc(F)cc2)CC1	CCOC(=O)N1CCC(=NNC(=O)c2ccc(Cl)cc2)CC1	3.89218	4.08746	-0.195279	CHEMBL3875352	CHEMBL3875352	TRUE
O=c1cc(-c2ccnc(NC3CCOCC3)n2)ccn1C(CO)c1ccc(F)c(F)c1	O=c1cc(-c2ccnc(NC3CCOCC3)n2)ccn1C(CO)c1ccc(F)c(Cl)c1	7.23657	7.4318	-0.195226	CHEMBL3412888	CHEMBL3412888	TRUE
Fc1ccc(-c2nnc(C=Cc3ccc(Br)s3)o2)cc1	Clc1ccc(-c2nnc(C=Cc3ccc(Br)s3)o2)cc1	4.78781	4.98297	-0.195154	CHEMBL3768180	CHEMBL3768180	TRUE
O=S(=O)(C=Cc1ccc(Cl)nc1)c1ccccc1F	O=S(=O)(C=Cc1ccc(Cl)nc1)c1ccccc1Cl	5.5938	5.78888	-0.195079	CHEMBL4712767	CHEMBL4712767	TRUE
O=C(O)CCC1CCc2cc(-c3cc(OC4CCC4)cc(F)c3F)ccc2O1	O=C(O)CCC1CCc2cc(-c3cc(OC4CCC4)cc(Cl)c3F)ccc2O1	7.88606	8.08092	-0.194865	CHEMBL3872142	CHEMBL3872142	TRUE
N#Cc1ccc(Oc2ccc(S(=O)(=O)Nc3ccc(F)cn3)cc2F)cc1F	N#Cc1ccc(Oc2ccc(S(=O)(=O)Nc3ccc(F)cn3)cc2Cl)cc1F	6.41794	6.61261	-0.194674	CHEMBL3853443	CHEMBL3853443	TRUE
C=CC(=O)N1CC(NC(=O)Cn2cc(C(=O)N3CCc4cc(F)ccc4C3)c3cc(Br)ccc32)C1	C=CC(=O)N1CC(NC(=O)Cn2cc(C(=O)N3CCc4cc(Cl)ccc4C3)c3cc(Br)ccc32)C1	4.55284	4.74715	-0.194305	CHEMBL4368373	CHEMBL4368373	TRUE
CC(C)(C)OC(=O)NC1CCN(C(c2cc3c(cc2O)OCO3)c2ccc(F)cc2F)C1	CC(C)(C)OC(=O)NC1CCN(C(c2cc3c(cc2O)OCO3)c2ccc(Cl)cc2F)C1	6.76195	6.95468	-0.192723	CHEMBL4832320	CHEMBL4832320	TRUE
O=C(COc1ccc(S(=O)(=O)NCCc2ccccc2)cc1)NCc1ccc(F)cc1	O=C(COc1ccc(S(=O)(=O)NCCc2ccccc2)cc1)NCc1ccc(Cl)cc1	5.09151	5.284	-0.192482	CHEMBL3614737	CHEMBL3614737	TRUE
O=C(COc1ccc(S(=O)(=O)NCCc2ccccc2)cc1)NCc1ccc(F)cc1	O=C(COc1ccc(S(=O)(=O)NCCc2ccccc2)cc1)NCc1ccc(Cl)cc1	5.09151	5.284	-0.192482	CHEMBL3614737	CHEMBL3614737	TRUE
CC(=O)NC1C(NC(=N)NC(=O)Cn2cc(-c3cccc(F)c3)nn2)C=C(C(=O)O)OC1C(O)C(O)CO	CC(=O)NC1C(NC(=N)NC(=O)Cn2cc(-c3cccc(Cl)c3)nn2)C=C(C(=O)O)OC1C(O)C(O)CO	7.85387	8.04576	-0.191886	CHEMBL3871450	CHEMBL3871450	TRUE
O=C(COc1ccccc1F)NO	O=C(COc1ccccc1Cl)NO	3.91542	4.10513	-0.189707	CHEMBL4233573	CHEMBL4233573	TRUE
Cc1nc2ccc(C(=O)c3cnn(C)c3O)cc2c(=O)n1-c1ccc(F)cc1	Cc1nc2ccc(C(=O)c3cnn(C)c3O)cc2c(=O)n1-c1ccc(Cl)cc1	7.46852	7.65758	-0.189056	CHEMBL3388490	CHEMBL3388490	TRUE
CCCC(Oc1ccc(-n2cc(F)cn2)cc1)c1ccc(C(=O)NCCC(=O)O)cc1	CCCC(Oc1ccc(-n2cc(Cl)cn2)cc1)c1ccc(C(=O)NCCC(=O)O)cc1	5.76955	5.95861	-0.189056	CHEMBL2382751	CHEMBL2382751	TRUE
O=C(O)CCC(NC(=O)C(CC(=O)O)NC(=O)C(Cc1ccc2ccccc2c1)NC(=O)c1cc2cc(Cl)ccc2[nH]1)C(=O)Nc1ccc(F)cc1	O=C(O)CCC(NC(=O)C(CC(=O)O)NC(=O)C(Cc1ccc2ccccc2c1)NC(=O)c1cc2cc(Cl)ccc2[nH]1)C(=O)Nc1ccc(Cl)cc1	4.76955	4.95861	-0.189056	CHEMBL4339580	CHEMBL4339580	TRUE
COc1cc2c(cc1OC)S(=O)(=O)C(CC1(F)CCN(Cc3ccccc3F)CC1)C2	COc1cc2c(cc1OC)S(=O)(=O)C(CC1(F)CCN(Cc3ccccc3Cl)CC1)C2	8.07058	8.25964	-0.189056	CHEMBL5162941	CHEMBL5162941	TRUE
N#Cc1c(-c2ccc(F)c(F)c2)c2c(=O)[nH]c(=O)[nH]c2[nH]c1=O	N#Cc1c(-c2ccc(F)c(Cl)c2)c2c(=O)[nH]c(=O)[nH]c2[nH]c1=O	6.25259	6.44129	-0.188703	CHEMBL3867377	CHEMBL3867377	TRUE
CC(C)(C)n1cc2c(n1)C(=O)CC1(CCN(C(=O)c3cc(-c4ccc(F)cc4)nc4ccccc34)CC1)O2	CC(C)(C)n1cc2c(n1)C(=O)CC1(CCN(C(=O)c3cc(-c4ccc(Cl)cc4)nc4ccccc34)CC1)O2	8.02687	8.21538	-0.188511	CHEMBL4735021	CHEMBL4735021	TRUE
Nc1ccc2ccc(CCNCCc3cccc(F)c3)cc2n1	Nc1ccc2ccc(CCNCCc3cccc(Cl)c3)cc2n1	4.95234	5.14026	-0.187926	CHEMBL3130555	CHEMBL3130555	TRUE
CN(c1ccc(F)cc1)S(=O)(=O)c1cccc(C(=O)Nc2ccc(C#N)cc2)c1	CN(c1ccc(Cl)cc1)S(=O)(=O)c1cccc(C(=O)Nc2ccc(C#N)cc2)c1	5.02687	5.21467	-0.187798	CHEMBL3240191	CHEMBL3240191	TRUE
O=C(c1ccc(-c2ccc(F)cc2)o1)N1CCc2ccccc2C1	O=C(c1ccc(-c2ccc(Cl)cc2)o1)N1CCc2ccccc2C1	4.98422	5.17198	-0.187764	CHEMBL4153366	CHEMBL4153366	TRUE
O=S(=O)(C=Cc1cccnc1Cl)c1cccc(F)c1	O=S(=O)(C=Cc1cccnc1Cl)c1cccc(Cl)c1	6.48413	6.67162	-0.187494	CHEMBL4712767	CHEMBL4712767	TRUE
CNS(=O)(=O)c1ccc(F)c(Nc2cc(Nc3ccc(Cl)cc3)ncn2)c1	CNS(=O)(=O)c1ccc(Cl)c(Nc2cc(Nc3ccc(Cl)cc3)ncn2)c1	6.69897	6.88606	-0.187087	CHEMBL4024626	CHEMBL4024626	TRUE
CNS(=O)(=O)c1ccc(F)c(Nc2cc(Nc3ccc(Cl)cc3)ncn2)c1	CNS(=O)(=O)c1ccc(Cl)c(Nc2cc(Nc3ccc(Cl)cc3)ncn2)c1	6.69897	6.88606	-0.187087	CHEMBL3861903	CHEMBL3861903	TRUE
CC(C)(C)c1cc(C(=O)C(C#N)=NNc2ccc(F)c(F)c2)no1	CC(C)(C)c1cc(C(=O)C(C#N)=NNc2ccc(Cl)c(F)c2)no1	5.18046	5.36653	-0.186075	CHEMBL3595150	CHEMBL3595150	TRUE
CN1CCN(C)C(c2ccc(Nc3nc(-c4ccc(Cl)c(NC(=O)c5cc6c(s5)CCCC6)c4F)cn(C)c3=O)cc2)C1=O	CN1CCN(C)C(c2ccc(Nc3nc(-c4ccc(Cl)c(NC(=O)c5cc6c(s5)CCCC6)c4Cl)cn(C)c3=O)cc2)C1=O	7.63827	7.82391	-0.185637	CHEMBL3748501	CHEMBL3748501	TRUE
O=C(Nc1nc2ccc(F)cc2s1)c1ccc(OC(F)F)c(OCC2CC2)c1	O=C(Nc1nc2ccc(Cl)cc2s1)c1ccc(OC(F)F)c(OCC2CC2)c1	8.72816	8.91364	-0.185482	CHEMBL4197724	CHEMBL4197724	TRUE
COc1ccc(C2=NCCN2c2ccc(S(N)(=O)=O)cc2)cc1F	COc1ccc(C2=NCCN2c2ccc(S(N)(=O)=O)cc2)cc1Cl	5.02228	5.20761	-0.185332	CHEMBL3365665	CHEMBL3365665	TRUE
O=C(c1ccc(F)cc1)N1CCCn2nc(COc3ccccc3)cc21	O=C(c1ccc(Cl)cc1)N1CCCn2nc(COc3ccccc3)cc21	6.22475	6.40999	-0.185241	CHEMBL3636798	CHEMBL3636798	TRUE
CN1N=C(c2ccc(O)cc2)CC1c1cccc(F)c1	CN1N=C(c2ccc(O)cc2)CC1c1cccc(Cl)c1	5.49894	5.68403	-0.185089	CHEMBL2421086	CHEMBL2421086	TRUE
CCN(CC)CCCNc1nc(C=Cc2ccc(F)cc2)nc2cc3ccccc3cc12	CCN(CC)CCCNc1nc(C=Cc2ccc(Cl)cc2)nc2cc3ccccc3cc12	5.34679	5.53165	-0.184865	CHEMBL4315097	CHEMBL4315097	TRUE
COC(=O)c1ccc(C2C(C(=O)c3cccnc3)=C(O)C(=O)N2CCc2c[nH]c3cc(F)ccc23)cc1	COC(=O)c1ccc(C2C(C(=O)c3cccnc3)=C(O)C(=O)N2CCc2c[nH]c3cc(Cl)ccc23)cc1	4.88606	5.07058	-0.184524	CHEMBL3241939	CHEMBL3241939	TRUE
CCCCNC(=O)Nc1ccc(-c2sc(C)nc2-c2ccc(F)cc2)cc1	CCCCNC(=O)Nc1ccc(-c2sc(C)nc2-c2ccc(Cl)cc2)cc1	5.0186	5.20273	-0.184132	CHEMBL4049898	CHEMBL4049898	TRUE
O=c1c2c(O)cccc2oc2cc(NS(=O)(=O)c3ccc(F)cc3)c(O)c(O)c12	O=c1c2c(O)cccc2oc2cc(NS(=O)(=O)c3ccc(Cl)cc3)c(O)c(O)c12	5.25964	5.4437	-0.18406	CHEMBL4222108	CHEMBL4222108	TRUE
O=C(Nc1cccc(F)c1)Nc1nc(-c2cc3cc(Br)ccc3o2)cs1	O=C(Nc1cccc(Cl)c1)Nc1nc(-c2cc3cc(Br)ccc3o2)cs1	4.39621	4.57971	-0.183508	CHEMBL3619984	CHEMBL3619984	TRUE
N#CN=C1SCCN1C(=O)c1coc(-c2cccc(F)c2)n1	N#CN=C1SCCN1C(=O)c1coc(-c2cccc(Cl)c2)n1	4.55909	4.74232	-0.183231	CHEMBL4775063	CHEMBL4775063	TRUE
Fc1cc2cc(c1)Nc1nc(nc(-c3cccc(C(F)(F)F)n3)n1)NCCOCCCC2	FC(F)(F)c1cccc(-c2nc3nc(n2)Nc2cc(Cl)cc(c2)CCCCOCCN3)n1	7.73049	7.91364	-0.183153	CHEMBL4708483	CHEMBL4708483	TRUE
N#CC1=C(N)Nc2[nH]c(=O)[nH]c(=O)c2C1c1ccc(F)c(Cl)c1	N#CC1=C(N)Nc2[nH]c(=O)[nH]c(=O)c2C1c1ccc(Cl)c(Cl)c1	6.05601	6.23882	-0.182813	CHEMBL3867377	CHEMBL3867377	TRUE
O=C(OCCn1c([N+](=O)[O-])cnc1C=Cc1cccc(F)c1)c1cccc2c1OCCO2	O=C(OCCn1c([N+](=O)[O-])cnc1C=Cc1cccc(Cl)c1)c1cccc2c1OCCO2	5.28316	5.46597	-0.182812	CHEMBL3268423	CHEMBL3268423	TRUE
Fc1ccccc1-c1nn2c(-c3ccccn3)nnc2s1	Clc1ccccc1-c1nn2c(-c3ccccn3)nnc2s1	6.17393	6.35655	-0.182622	CHEMBL4008373	CHEMBL4008373	TRUE
Cc1cc(=O)c(O)cn1Cc1cc2ccc(OCc3cccc(F)c3)cc2oc1=O	Cc1cc(=O)c(O)cn1Cc1cc2ccc(OCc3cccc(Cl)c3)cc2oc1=O	6.71534	6.89791	-0.182566	CHEMBL4367981	CHEMBL4367981	TRUE
CCCCCCCCCCCC(=O)NNC(=O)c1c(O)c2cc(F)ccc2[nH]c1=O	CCCCCCCCCCCC(=O)NNC(=O)c1c(O)c2cc(Cl)ccc2[nH]c1=O	5.23657	5.41908	-0.182503	CHEMBL4016684	CHEMBL4016684	TRUE
CC12COC(c3ccccc3)OC1CCC1(C)C2CC(OC(=O)c2ccccc2F)C2(C)Oc3cc(-c4cccnc4)oc(=O)c3C(O)C12	CC12COC(c3ccccc3)OC1CCC1(C)C2CC(OC(=O)c2ccccc2Cl)C2(C)Oc3cc(-c4cccnc4)oc(=O)c3C(O)C12	5.56864	5.74958	-0.180944	CHEMBL2399638	CHEMBL2399638	TRUE
COc1ccc(NC(=O)Nc2ccc(C(=O)NN=C3C(=O)Nc4ccc(F)cc43)cc2)cc1	COc1ccc(NC(=O)Nc2ccc(C(=O)NN=C3C(=O)Nc4ccc(Cl)cc43)cc2)cc1	5.42136	5.60206	-0.180699	CHEMBL4330587	CHEMBL4330587	TRUE
Cc1cc(C2CS(=O)(=O)Oc3c2c(C2CC2)nn3-c2ccccc2F)ccc1Br	Cc1cc(C2CS(=O)(=O)Oc3c2c(C2CC2)nn3-c2ccccc2Cl)ccc1Br	5.24336	5.42366	-0.180295	CHEMBL4408391	CHEMBL4408391	TRUE
Cc1ccoc1C(=O)Nc1ccc(N2C(=O)c3cccc(F)c3C2=O)cc1	Cc1ccoc1C(=O)Nc1ccc(N2C(=O)c3cccc(Cl)c3C2=O)cc1	7.36002	7.54	-0.179989	CHEMBL3635102	CHEMBL3635102	TRUE
Fc1cc(-c2ccn3c(CC4CC4)nnc3c2Cl)ccc1NC1CC1	Clc1cc(-c2ccn3c(CC4CC4)nnc3c2Cl)ccc1NC1CC1	7.99012	8.16999	-0.179865	CHEMBL4040510	CHEMBL4040510	TRUE
O=C(NNCc1ccc(O)c(O)c1O)c1ccc(F)cc1	O=C(NNCc1ccc(O)c(O)c1O)c1ccc(Cl)cc1	6.18709	6.36653	-0.179445	CHEMBL3856822	CHEMBL3856822	TRUE
NS(=O)(=O)c1ccc(-n2nc(C(=O)N3CCOCC3)cc2-c2cccc(F)c2)cc1	NS(=O)(=O)c1ccc(-n2nc(C(=O)N3CCOCC3)cc2-c2cccc(Cl)c2)cc1	5.6968	5.87615	-0.179344	CHEMBL4347183	CHEMBL4347183	TRUE
O=C(C1=C(O)C(=O)N(c2nc3ccc(F)cc3s2)C1c1cccc(F)c1)c1ccco1	O=C(C1=C(O)C(=O)N(c2nc3ccc(F)cc3s2)C1c1cccc(Cl)c1)c1ccco1	4.37059	4.54975	-0.17916	CHEMBL3405544	CHEMBL3405544	TRUE
O=C(C1=C(O)C(=O)N(c2nc3ccc(F)cc3s2)C1c1cccc(F)c1)c1ccco1	O=C(C1=C(O)C(=O)N(c2nc3ccc(F)cc3s2)C1c1cccc(Cl)c1)c1ccco1	4.37059	4.54975	-0.17916	CHEMBL3405544	CHEMBL3405544	TRUE
N#Cc1cc2c(Oc3ccc(OS(=O)(=O)F)cc3OCCn3ccc(=O)[nH]c3=O)cc(F)cn2c1	N#Cc1cc2c(Oc3ccc(OS(=O)(=O)F)cc3OCCn3ccc(=O)[nH]c3=O)cc(Cl)cn2c1	7.19382	7.37263	-0.178814	CHEMBL4679904	CHEMBL4679904	TRUE
O=C1C(=NNc2cn[nH]c(=O)c2Cl)c2cc(Cl)ccc2N1c1ccc(F)cc1	O=C1C(=NNc2cn[nH]c(=O)c2Cl)c2cc(Cl)ccc2N1c1ccc(Cl)cc1	4.67551	4.85171	-0.176194	CHEMBL4337635	CHEMBL4337635	TRUE
COC1C(C(=O)N(C)c2ccc3ncsc3c2)OC(CO)C(O)C1n1cc(-c2ccc(Cl)c(F)c2F)nn1	COC1C(C(=O)N(C)c2ccc3ncsc3c2)OC(CO)C(O)C1n1cc(-c2ccc(Cl)c(Cl)c2F)nn1	7.67778	7.85387	-0.176091	CHEMBL4679827	CHEMBL4679827	TRUE
CC(C)(O)c1cncc(-n2ncc3c(F)ccc(F)c32)c1	CC(C)(O)c1cncc(-n2ncc3c(Cl)ccc(F)c32)c1	9.52288	9.69897	-0.176091	CHEMBL4029972	CHEMBL4029972	TRUE
O=c1cc(CSc2ccc(F)cc2)occ1O	O=c1cc(CSc2ccc(Cl)cc2)occ1O	6.52288	6.69897	-0.176091	CHEMBL2399754	CHEMBL2399754	TRUE
COc1ccc(NC(C)=O)c(OCC(N)CN2CCC3(CC2)Cc2cc(F)ccc2O3)c1	COc1ccc(NC(C)=O)c(OCC(N)CN2CCC3(CC2)Cc2cc(Cl)ccc2O3)c1	8.04576	8.22185	-0.176091	CHEMBL2340879	CHEMBL2340879	TRUE
N#CC(C(=O)NCc1cccc(F)c1)c1nc2ccccc2nc1N1CCCCCC1	N#CC(C(=O)NCc1cccc(Cl)c1)c1nc2ccccc2nc1N1CCCCCC1	3.82391	4	-0.176091	CHEMBL2329449	CHEMBL2329449	TRUE
COc1ccc(NC(=O)C(=O)Nc2ccc(F)cc2)c(C(=O)Nc2ccc(N3CCOCC3=O)cc2)c1	COc1ccc(NC(=O)C(=O)Nc2ccc(Cl)cc2)c(C(=O)Nc2ccc(N3CCOCC3=O)cc2)c1	6.16877	6.34486	-0.176091	CHEMBL3413863	CHEMBL3413863	TRUE
COc1ccc(OC)c2c1c(OC)cc1c(=O)cc(-c3ccc(F)cc3)oc12	COc1ccc(OC)c2c1c(OC)cc1c(=O)cc(-c3ccc(Cl)cc3)oc12	9.52288	9.69897	-0.176091	CHEMBL3423815	CHEMBL3423815	TRUE
CC(C)(C)OC(=O)NC1CCCCCC=CC2CC2(C(=O)NS(=O)(=O)C2CC2)NC(=O)C2CC(OC(=O)N3Cc4ccc(F)cc4C3)CN2C1=O	CC(C)(C)OC(=O)NC1CCCCCC=CC2CC2(C(=O)NS(=O)(=O)C2CC2)NC(=O)C2CC(OC(=O)N3Cc4ccc(Cl)cc4C3)CN2C1=O	8.52288	8.69897	-0.176091	CHEMBL3122260	CHEMBL3122260	TRUE
O=C1Nc2ccc(F)cc2C1=Cc1ccc2cn[nH]c2c1	O=C1Nc2ccc(Cl)cc2C1=Cc1ccc2cn[nH]c2c1	4.82391	5	-0.176091	CHEMBL2410316	CHEMBL2410316	TRUE
Cc1ccc(S(=O)(=O)N(CC(=O)N(Cc2ccc(C3CCCCC3)cc2)c2ccc(C(=O)O)c(O)c2)Cc2cccc(F)c2)cc1	Cc1ccc(S(=O)(=O)N(CC(=O)N(Cc2ccc(C3CCCCC3)cc2)c2ccc(C(=O)O)c(O)c2)Cc2cccc(Cl)c2)cc1	5.04576	5.22185	-0.176091	CHEMBL2434703	CHEMBL2434703	TRUE
O=S(=O)(Nc1ccc(-c2ccc(F)cc2)c2cccnc12)c1ccccn1	O=S(=O)(Nc1ccc(-c2ccc(Cl)cc2)c2cccnc12)c1ccccn1	6.14267	6.31876	-0.176091	CHEMBL4370193	CHEMBL4370193	TRUE
O=C(O)CC(CC(=O)Nc1ccc(Oc2ccc(F)cc2)cc1)c1ccccc1	O=C(O)CC(CC(=O)Nc1ccc(Oc2ccc(Cl)cc2)cc1)c1ccccc1	7.82391	8	-0.176091	CHEMBL3637350	CHEMBL3637350	TRUE
CC(=NNC(N)=O)c1nnn(-c2ccc(F)cc2)c1C	CC(=NNC(N)=O)c1nnn(-c2ccc(Cl)cc2)c1C	5.07572	5.25181	-0.176091	CHEMBL4770892	CHEMBL4770892	TRUE
N#CC1=C(N)Oc2c(c(=O)[nH]c3c2ccc2ccccc23)C1c1ccc(F)cc1	N#CC1=C(N)Oc2c(c(=O)[nH]c3c2ccc2ccccc23)C1c1ccc(Cl)cc1	4.82391	5	-0.176091	CHEMBL4305683	CHEMBL4305683	TRUE
CSc1nnc(Cc2ccc(Cl)cc2Oc2ccccc2F)[nH]1	CSc1nnc(Cc2ccc(Cl)cc2Oc2ccccc2Cl)[nH]1	8.42262	8.5986	-0.175976	CHEMBL3122360	CHEMBL3122360	TRUE
O=C1NC(=S)NC1=Cc1ccc(-c2cccc(F)c2)s1	O=C1NC(=S)NC1=Cc1ccc(-c2cccc(Cl)c2)s1	4.96778	5.14327	-0.175487	CHEMBL3106784	CHEMBL3106784	TRUE
Cc1c(C(C#N)c2cc(F)cc(Cl)c2)nc(SC(C)C)[nH]c1=O	Cc1c(C(C#N)c2cc(Cl)cc(Cl)c2)nc(SC(C)C)[nH]c1=O	6.14509	6.31966	-0.174578	CHEMBL5140369	CHEMBL5140369	TRUE
O=C1CCOc2cc(OCc3cccc(F)c3)ccc21	O=C1CCOc2cc(OCc3cccc(Cl)c3)ccc21	7.2786	7.45272	-0.174116	CHEMBL3745316	CHEMBL3745316	TRUE
CCOc1cc(C=C2Oc3cc(F)ccc3C2=O)ccc1O	CCOc1cc(C=C2Oc3cc(Cl)ccc3C2=O)ccc1O	4.21896	4.39212	-0.173153	CHEMBL4014505	CHEMBL4014505	TRUE
O=[N+]([O-])C=Cc1ccc(F)cc1	O=[N+]([O-])C=Cc1ccc(Cl)cc1	5.3098	5.48149	-0.171682	CHEMBL4729761	CHEMBL4729761	TRUE
CN(O)C(=O)CC(O)c1cccc(F)c1	CN(O)C(=O)CC(O)c1cccc(Cl)c1	4.14752	4.31876	-0.171239	CHEMBL4432244	CHEMBL4432244	TRUE
O=C(Nc1ccc(F)cc1Cl)c1cc(Cl)ccc1O	O=C(Nc1ccc(Cl)cc1Cl)c1cc(Cl)ccc1O	5.18046	5.35164	-0.171184	CHEMBL4821031	CHEMBL4821031	TRUE
Nc1ccccc1NC(=O)c1ccc(NC(=S)NCc2ccc(F)nc2)cc1	Nc1ccccc1NC(=O)c1ccc(NC(=S)NCc2ccc(Cl)nc2)cc1	6.4318	6.60206	-0.170262	CHEMBL4019743	CHEMBL4019743	TRUE
O=C(NCc1ccc(F)cc1Cl)c1cc(Cl)ccc1O	O=C(NCc1ccc(Cl)cc1Cl)c1cc(Cl)ccc1O	5.59176	5.76195	-0.170194	CHEMBL4404536	CHEMBL4404536	TRUE
Fc1ccc(-c2nc(-c3ccccc3)c3n2CCc2c-3[nH]c3ccccc23)cc1	Clc1ccc(-c2nc(-c3ccccc3)c3n2CCc2c-3[nH]c3ccccc23)cc1	3.73993	3.91009	-0.170166	CHEMBL4424047	CHEMBL4424047	TRUE
CC1CCN(CCCOc2ccc(=O)n(-c3ccc(F)c(Cl)c3)n2)CC1	CC1CCN(CCCOc2ccc(=O)n(-c3ccc(Cl)c(Cl)c3)n2)CC1	5.66555	5.83565	-0.170101	CHEMBL3806618	CHEMBL3806618	TRUE
Cc1ccc(Oc2ccc(-c3ccn4c(CC5CC5)nnc4c3C)cc2F)c(C)n1	Cc1ccc(Oc2ccc(-c3ccn4c(CC5CC5)nnc4c3C)cc2Cl)c(C)n1	7.65995	7.83003	-0.170079	CHEMBL4040510	CHEMBL4040510	TRUE
CC(C)(C)OC(=O)NC1CCN(C(c2cc3c(cc2O)OCO3)c2ccc(F)cc2F)C1	CC(C)(C)OC(=O)NC1CCN(C(c2cc3c(cc2O)OCO3)c2ccc(F)cc2Cl)C1	6.76195	6.93181	-0.16986	CHEMBL4832320	CHEMBL4832320	TRUE
CCN(Cc1cc(C(F)(F)F)ccc1-c1nn(CC(=O)O)c2ccc(F)cc12)C(=O)C1CC1	CCN(Cc1cc(C(F)(F)F)ccc1-c1nn(CC(=O)O)c2ccc(Cl)cc12)C(=O)C1CC1	7.46852	7.63827	-0.169751	CHEMBL3385689	CHEMBL3385689	TRUE
O=S1(=O)CCc2c(CN3CCN(Cc4ccccc4)CC3)nn(-c3ccccc3F)c2O1	O=S1(=O)CCc2c(CN3CCN(Cc4ccccc4)CC3)nn(-c3ccccc3Cl)c2O1	6.16749	6.33724	-0.169751	CHEMBL4708126	CHEMBL4708126	TRUE
NS(=O)(=O)OCC1CC(Nc2ncncc2C(=O)c2ccn(Cc3cccc(F)c3)n2)CC1O	NS(=O)(=O)OCC1CC(Nc2ncncc2C(=O)c2ccn(Cc3cccc(Cl)c3)n2)CC1O	6.44733	6.61618	-0.168853	CHEMBL4834990	CHEMBL4834990	TRUE
O=C(Cc1ccc(-c2ccc3nccn3c2)cc1)Nc1cccc(F)c1	O=C(Cc1ccc(-c2ccc3nccn3c2)cc1)Nc1cccc(Cl)c1	4	4.16877	-0.16877	CHEMBL3378365	CHEMBL3378365	TRUE
O=C(NN=Cc1ccc(O)c(O)c1O)c1ccc(F)cc1	O=C(NN=Cc1ccc(O)c(O)c1O)c1ccc(Cl)cc1	6.06048	6.22915	-0.168667	CHEMBL3856822	CHEMBL3856822	TRUE
COc1ccc(CN2CCOC(COc3ccccc3)C2)cc1F	COc1ccc(CN2CCOC(COc3ccccc3)C2)cc1Cl	7.25181	7.42022	-0.168404	CHEMBL3796307	CHEMBL3796307	TRUE
CNC(=O)C12CC1C(n1cnc3c(NC4CC4c4cccc(F)c4)nc(C#Cc4ccccc4)nc31)C(O)C2O	CNC(=O)C12CC1C(n1cnc3c(NC4CC4c4cccc(Cl)c4)nc(C#Cc4ccccc4)nc31)C(O)C2O	7.78252	7.95078	-0.168266	CHEMBL3363693	CHEMBL3363693	TRUE
O=C(NCc1ccc(F)c(F)c1)c1cc2cccc(O)c2n(O)c1=O	O=C(NCc1ccc(F)c(Cl)c1)c1cc2cccc(O)c2n(O)c1=O	6.10791	6.27572	-0.167819	CHEMBL3132334	CHEMBL3132334	TRUE
Fc1ccc(-c2ccc3c(ccn3Cc3coc(/C=C/c4ccc(C(F)(F)F)cc4)n3)c2)cc1	FC(F)(F)c1ccc(/C=C/c2nc(Cn3ccc4cc(-c5ccc(Cl)cc5)ccc43)co2)cc1	5.27901	5.44612	-0.167103	CHEMBL5122916	CHEMBL5122916	TRUE
Nc1nc(Cl)nc2c1ncn2C1OC(COCc2ccccc2F)C(O)C1F	Nc1nc(Cl)nc2c1ncn2C1OC(COCc2ccccc2Cl)C(O)C1F	6.3279	6.49485	-0.166948	CHEMBL4182273	CHEMBL4182273	TRUE
Fc1cccc(-c2nc3ccc(Nc4ccnc5ccccc45)cc3[nH]2)c1	Clc1cccc(-c2nc3ccc(Nc4ccnc5ccccc45)cc3[nH]2)c1	5.45346	5.61979	-0.166331	CHEMBL3373860	CHEMBL3373860	TRUE
CC1(c2cc(NC(=O)c3ccc(F)cn3)ccc2F)N=C(N)OCC1(F)F	CC1(c2cc(NC(=O)c3ccc(Cl)cn3)ccc2F)N=C(N)OCC1(F)F	7.65758	7.82391	-0.166331	CHEMBL2353184	CHEMBL2353184	TRUE
O=C1C(NC(Cc2ccccc2)C(=O)Nc2ccc(F)cc2)=CC(=NO)c2ccccc21	O=C1C(NC(Cc2ccccc2)C(=O)Nc2ccc(Cl)cc2)=CC(=NO)c2ccccc21	7.00877	7.17393	-0.165151	CHEMBL4381956	CHEMBL4381956	TRUE
Cc1ccoc1C(=O)Nc1ccc(N2C(=O)c3cccc(F)c3C2=O)c(C(F)(F)F)c1	Cc1ccoc1C(=O)Nc1ccc(N2C(=O)c3cccc(Cl)c3C2=O)c(C(F)(F)F)c1	6.80967	6.97469	-0.165026	CHEMBL3635102	CHEMBL3635102	TRUE
Nc1nc(NCCNc2ncc(-c3ncc[nH]3)c(-c3cc(F)c(Cl)cc3F)n2)ccc1[N+](=O)[O-	Nc1nc(NCCNc2ncc(-c3ncc[nH]3)c(-c3cc(F)c(Cl)cc3Cl)n2)ccc1[N+](=O)[O-	7.72125	7.88606	-0.16481	CHEMBL4022683	CHEMBL4022683	TRUE
CCCSc1nnc(Cc2ccc(Cl)cc2Oc2ccccc2F)[nH]1	CCCSc1nnc(Cc2ccc(Cl)cc2Oc2ccccc2Cl)[nH]1	8.70597	8.86967	-0.163691	CHEMBL3122360	CHEMBL3122360	TRUE
COc1ccc2c(c1)CCC(Cc1cc[n+](Cc3ccccc3F)cc1C(C)=O)C2=O	COc1ccc2c(c1)CCC(Cc1cc[n+](Cc3ccccc3Cl)cc1C(C)=O)C2=O	7.36653	7.53018	-0.163646	CHEMBL4146836	CHEMBL4146836	TRUE
NC(=O)c1cc2c(Oc3ccc(Cl)cc3)cnc(F)c2s1	NC(=O)c1cc2c(Oc3ccc(Cl)cc3)cnc(Cl)c2s1	7.79588	7.95861	-0.162727	CHEMBL3807238	CHEMBL3807238	TRUE
Cc1ccc2c(c1)N=C(C1=CC(C)N(C)CC1)c1cc(F)ccc1N2	Cc1ccc2c(c1)N=C(C1=CC(C)N(C)CC1)c1cc(Cl)ccc1N2	5.79588	5.95861	-0.162727	CHEMBL4671572	CHEMBL4671572	TRUE
O=C(NC1CCCCC1)c1c(NO)cc(-c2ccc(F)cc2)oc1=O	O=C(NC1CCCCC1)c1c(NO)cc(-c2ccc(Cl)cc2)oc1=O	5.49485	5.65758	-0.162727	CHEMBL3636663	CHEMBL3636663	TRUE
CCCN(C(=O)NC(CSCc1ccccc1)C(=O)O)C(=O)c1cccc(-c2ccc(F)cc2)c1	CCCN(C(=O)NC(CSCc1ccccc1)C(=O)O)C(=O)c1cccc(-c2ccc(Cl)cc2)c1	3.90309	4.0655	-0.162412	CHEMBL3131103	CHEMBL3131103	TRUE
CC1=CC(c2ccccc2)n2nc(NC(=O)c3ccc(F)cc3)nc2N1	CC1=CC(c2ccccc2)n2nc(NC(=O)c3ccc(Cl)cc3)nc2N1	3.86012	4.02228	-0.162155	CHEMBL3580290	CHEMBL3580290	TRUE
O=C(Nc1cccc(CNc2nc3ccc(OCCN4CCOCC4)cc3s2)c1)c1ccc(F)cc1	O=C(Nc1cccc(CNc2nc3ccc(OCCN4CCOCC4)cc3s2)c1)c1ccc(Cl)cc1	5.04576	5.20761	-0.161851	CHEMBL4036222	CHEMBL4036222	TRUE
CC(C)Oc1ccc(Nc2nc(=O)n(C(C)C)c(=O)n2Cc2ccc(Cl)cc2)cc1F	CC(C)Oc1ccc(Nc2nc(=O)n(C(C)C)c(=O)n2Cc2ccc(Cl)cc2)cc1Cl	7.34679	7.50864	-0.161851	CHEMBL4737205	CHEMBL4737205	TRUE
Cn1cc(-c2cc(NS(C)(=O)=O)ccc2Oc2ccc(F)cc2F)c2cc[nH]c2c1=O	Cn1cc(-c2cc(NS(C)(=O)=O)ccc2Oc2ccc(F)cc2Cl)c2cc[nH]c2c1=O	8.34679	8.50864	-0.161851	CHEMBL4020217	CHEMBL4020217	TRUE
O=C(Oc1cc(O)c2c(=O)c3ccccc3oc2c1)c1ccccc1F	O=C(Oc1cc(O)c2c(=O)c3ccccc3oc2c1)c1ccccc1Cl	4.50031	4.66154	-0.161231	CHEMBL3761353	CHEMBL3761353	TRUE
O=C1Nc2cccc(F)c2C12CCN(c1nc3c(c(=O)[nH]1)CCCC3)CC2	O=C1Nc2cccc(Cl)c2C12CCN(c1nc3c(c(=O)[nH]1)CCCC3)CC2	7.50724	7.66756	-0.160322	CHEMBL4388125	CHEMBL4388125	TRUE
Cc1n[nH]c2c1C(c1cccc(F)c1)c1c([nH]c(=O)[nH]c1=O)O2	Cc1n[nH]c2c1C(c1cccc(Cl)c1)c1c([nH]c(=O)[nH]c1=O)O2	5.87063	6.03058	-0.159952	CHEMBL3867377	CHEMBL3867377	TRUE
CCOC(=O)c1ccc(N2C(=O)C(O)=C(C(=O)c3ccc(OC)cc3)C2c2ccccc2F)cc1	CCOC(=O)c1ccc(N2C(=O)C(O)=C(C(=O)c3ccc(OC)cc3)C2c2ccccc2Cl)cc1	6.88606	7.04576	-0.159701	CHEMBL4124030	CHEMBL4124030	TRUE
O=C(Nc1cc(F)ccc1C(=O)O)c1ccc(-c2ccccc2)c(Oc2ccccc2)c1	O=C(Nc1cc(Cl)ccc1C(=O)O)c1ccc(-c2ccccc2)c(Oc2ccccc2)c1	4.88606	5.04576	-0.159701	CHEMBL2446350	CHEMBL2446350	TRUE
O=C(c1ccc(-c2ccccc2F)o1)N1CCc2ccccc2C1	O=C(c1ccc(-c2ccccc2Cl)o1)N1CCc2ccccc2C1	4.83062	4.98928	-0.158657	CHEMBL4153366	CHEMBL4153366	TRUE
O=C(O)c1nc2ccc(C(F)(F)F)cc2nc1NCc1ccc(F)cc1	O=C(O)c1nc2ccc(C(F)(F)F)cc2nc1NCc1ccc(Cl)cc1	7.14267	7.30103	-0.158362	CHEMBL4371330	CHEMBL4371330	TRUE
CC1Cc2c(nnn2-c2ncc(F)cn2)CN1C(=O)c1cccc(C(F)(F)F)c1F	CC1Cc2c(nnn2-c2ncc(F)cn2)CN1C(=O)c1cccc(C(F)(F)F)c1Cl	8.22915	8.38722	-0.158068	CHEMBL4033426	CHEMBL4033426	TRUE
O=C(O)C1CCCN(CCNN=Cc2ccccc2-c2ccc(F)cc2F)C1	O=C(O)C1CCCN(CCNN=Cc2ccccc2-c2ccc(Cl)cc2F)C1	7.44904	7.60695	-0.157913	CHEMBL2317559	CHEMBL2317559	TRUE
Fc1ccc(Cn2ccc3c(N4CCC(F)(F)CC4)nc4ccccc4c32)cc1	FC1(F)CCN(c2nc3ccccc3c3c2ccn3Cc2ccc(Cl)cc2)CC1	6.5391	6.6968	-0.157702	CHEMBL5164095	CHEMBL5164095	TRUE
CCSc1nc(Nc2cccc(F)c2)c2cnn(CC(C)c3ccccc3)c2n1	CCSc1nc(Nc2cccc(Cl)c2)c2cnn(CC(C)c3ccccc3)c2n1	6.10237	6.25964	-0.157264	CHEMBL3395759	CHEMBL3395759	TRUE
O=C(COc1cccc(F)c1)N1CCN(c2ccc([N+](=O)[O-])cc2)CC1	O=C(COc1cccc(Cl)c1)N1CCN(c2ccc([N+](=O)[O-])cc2)CC1	5.18046	5.33724	-0.156786	CHEMBL4432710	CHEMBL4432710	TRUE
CCn1cc(C(=NNc2nc(-c3ccc(F)cc3)c(C#N)s2)C(F)(F)F)c2cc(-c3nc(CN4CCC(O)CC4)cs3)ccc21	CCn1cc(C(=NNc2nc(-c3ccc(Cl)cc3)c(C#N)s2)C(F)(F)F)c2cc(-c3nc(CN4CCC(O)CC4)cs3)ccc21	5.68825	5.84466	-0.156418	CHEMBL4771183	CHEMBL4771183	TRUE
CC(C)(C)c1cc(C(=O)C(C#N)=NNc2ccc(Cl)c(F)c2)no1	CC(C)(C)c1cc(C(=O)C(C#N)=NNc2ccc(Cl)c(Cl)c2)no1	5.36653	5.52288	-0.156347	CHEMBL3595150	CHEMBL3595150	TRUE
O=C1C=C(Oc2ccc(F)cc2)c2ccccc2C1=O	O=C1C=C(Oc2ccc(Cl)cc2)c2ccccc2C1=O	6.73945	6.89483	-0.155379	CHEMBL3998953	CHEMBL3998953	TRUE
CN(C(=O)C(C#N)=Cc1cn(CC(=O)O)c2ccc(F)cc12)c1ccccc1	CN(C(=O)C(C#N)=Cc1cn(CC(=O)O)c2ccc(Cl)cc12)c1ccccc1	8	8.1549	-0.154902	CHEMBL2395624	CHEMBL2395624	TRUE
COc1ccccc1Cc1sc(NCc2ccc3c(c2)CCO3)nc1-c1ccccc1F	COc1ccccc1Cc1sc(NCc2ccc3c(c2)CCO3)nc1-c1ccccc1Cl	7.69897	7.85387	-0.154902	CHEMBL3875251	CHEMBL3875251	TRUE
CCOc1ccc(F)c2c1B(O)OC2CN	CCOc1ccc(Cl)c2c1B(O)OC2CN	7.09691	7.25181	-0.154902	CHEMBL4020311	CHEMBL4020311	TRUE
Cc1cc(Nc2nc(NCc3ccccc3F)nc3[nH]ncc23)n[nH]1	Cc1cc(Nc2nc(NCc3ccccc3Cl)nc3[nH]ncc23)n[nH]1	9	9.1549	-0.154902	CHEMBL5115458	CHEMBL5115458	TRUE
O=C(NCc1csc(/C(=N/O)Nc2cccc(Br)c2)c1)Nc1ccc(F)cc1	O=C(NCc1csc(/C(=N/O)Nc2cccc(Br)c2)c1)Nc1ccc(Cl)cc1	7.43415	7.58838	-0.154228	CHEMBL5043722	CHEMBL5043722	TRUE
O=C(C=Cc1ccc(O)c(O)c1)N1CCN(c2ccccc2F)CC1	O=C(C=Cc1ccc(O)c(O)c1)N1CCN(c2ccccc2Cl)CC1	5.10902	5.26281	-0.153787	CHEMBL3373138	CHEMBL3373138	TRUE
CC(Oc1ccc(Cl)cc1Cl)C(=O)NCc1cccc(F)c1	CC(Oc1ccc(Cl)cc1Cl)C(=O)NCc1cccc(Cl)c1	4.56864	4.72125	-0.15261	CHEMBL3399535	CHEMBL3399535	TRUE
CC(Oc1ccc(Cl)cc1Cl)C(=O)NCc1cccc(F)c1	CC(Oc1ccc(Cl)cc1Cl)C(=O)NCc1cccc(Cl)c1	4.56864	4.72125	-0.15261	CHEMBL3399535	CHEMBL3399535	TRUE
CNCCN1CCC(NCc2cccc(F)c2)CC1	CNCCN1CCC(NCc2cccc(Cl)c2)CC1	6.6517	6.8041	-0.152405	CHEMBL3994766	CHEMBL3994766	TRUE
O=C1OCc2ccc(OCCc3ccc(F)cc3)cc21	O=C1OCc2ccc(OCCc3ccc(Cl)cc3)cc21	7.16749	7.31876	-0.151268	CHEMBL2394315	CHEMBL2394315	TRUE
CC#CCn1c(N2CCCC(N)C2)nc2c1c(=O)n(CCCN1CCC(C(=O)Nc3ccc(F)cc3)CC1)c(=O)n2C	CC#CCn1c(N2CCCC(N)C2)nc2c1c(=O)n(CCCN1CCC(C(=O)Nc3ccc(Cl)cc3)CC1)c(=O)n2C	6.29243	6.4437	-0.151268	CHEMBL3873292	CHEMBL3873292	TRUE
O=[N+]([O-])c1c(Nc2ccc(F)c(Cl)c2)ccc2nonc12	O=[N+]([O-])c1c(Nc2ccc(Cl)c(Cl)c2)ccc2nonc12	6.76955	6.92082	-0.151268	CHEMBL2319602	CHEMBL2319602	TRUE
O=C(c1ccc(Cl)cc1)C1CCN(C(=O)c2cccc(O)c2F)CC1	O=C(c1ccc(Cl)cc1)C1CCN(C(=O)c2cccc(O)c2Cl)CC1	4.91009	5.06048	-0.150386	CHEMBL4424599	CHEMBL4424599	TRUE
CS(=O)(=O)c1ccc(N2CCN=C2c2ccc(F)cc2)cc1	CS(=O)(=O)c1ccc(N2CCN=C2c2ccc(Cl)cc2)cc1	5	5.14874	-0.148742	CHEMBL3365665	CHEMBL3365665	TRUE
CC1COc2c(N3CCC(C4(N)CC4)C3)c(F)c(F)c3cc(C(=O)O)c(=O)n1c23	CC1COc2c(N3CCC(C4(N)CC4)C3)c(F)c(Cl)c3cc(C(=O)O)c(=O)n1c23	3.67572	3.82391	-0.148191	CHEMBL4809364	CHEMBL4809364	TRUE
O=S(=O)(C=Cc1ncccc1F)c1ccc(OCCCN2CCOCC2)cc1	O=S(=O)(C=Cc1ncccc1Cl)c1ccc(OCCCN2CCOCC2)cc1	6.46092	6.60906	-0.148141	CHEMBL4331808	CHEMBL4331808	TRUE
CC(C)CC(N)CN(C(=O)C1CC1c1ccccc1)c1ccc(-c2ccc(F)cc2)cc1	CC(C)CC(N)CN(C(=O)C1CC1c1ccccc1)c1ccc(-c2ccc(Cl)cc2)cc1	6.04576	6.19382	-0.148063	CHEMBL3407083	CHEMBL3407083	TRUE
CC(=O)NCCOc1cc(F)ccc1C(=O)NCCCCC(NC(=O)NC(CCC(=O)O)C(=O)O)C(=O)O	CC(=O)NCCOc1cc(Cl)ccc1C(=O)NCCCCC(NC(=O)NC(CCC(=O)O)C(=O)O)C(=O)O	8.99482	9.14146	-0.146643	CHEMBL3363782	CHEMBL3363782	TRUE
O=C(Nc1ccc(F)cc1)c1ccn(Cn2cc([N+](=O)[O-])cn2)n1	O=C(Nc1ccc(Cl)cc1)c1ccn(Cn2cc([N+](=O)[O-])cn2)n1	4.55284	4.69897	-0.146128	CHEMBL4811162	CHEMBL4811162	TRUE
Fc1ccc2[nH]c(-c3cc4ccc(Br)cc4[nH]3)cc2c1	Clc1ccc2[nH]c(-c3cc4ccc(Br)cc4[nH]3)cc2c1	8.55284	8.69897	-0.146128	CHEMBL3120036	CHEMBL3120036	TRUE
CCn1c(C(C)NS(=O)(=O)c2ccc(F)cc2)nc2ccc(C(F)(F)F)cc21	CCn1c(C(C)NS(=O)(=O)c2ccc(Cl)cc2)nc2ccc(C(F)(F)F)cc21	8.1549	8.30103	-0.146128	CHEMBL3607180	CHEMBL3607180	TRUE
O=S(=O)(c1ccc(F)cc1)n1cnc2ccccc21	O=S(=O)(c1ccc(Cl)cc1)n1cnc2ccccc21	5.67778	5.82391	-0.146128	CHEMBL3118331	CHEMBL3118331	TRUE
O=P(O)(O)C(F)(F)c1ccc(-c2cccc(C(O)c3cc(Cl)c(Cl)cc3F)c2)cc1	O=P(O)(O)C(F)(F)c1ccc(-c2cccc(C(O)c3cc(Cl)c(Cl)cc3Cl)c2)cc1	4.85387	5	-0.146128	CHEMBL4032254	CHEMBL4032254	TRUE
Cc1c(C2CC2)nc2ccc(-n3ccc(OCc4ccc(F)cc4)cc3=O)cn12	Cc1c(C2CC2)nc2ccc(-n3ccc(OCc4ccc(Cl)cc4)cc3=O)cn12	7.55284	7.69897	-0.146128	CHEMBL3774040	CHEMBL3774040	TRUE
CC(C)(C)c1cc(CNC(=O)Nc2cccc3[nH]c(=O)ccc23)n(-c2cccc(F)c2)n1	CC(C)(C)c1cc(CNC(=O)Nc2cccc3[nH]c(=O)ccc23)n(-c2cccc(Cl)c2)n1	8.20971	8.35556	-0.145847	CHEMBL4775810	CHEMBL4775810	TRUE
O=C(NC(=S)NNC(=O)c1ccccc1O)c1ccc(F)cc1	O=C(NC(=S)NNC(=O)c1ccccc1O)c1ccc(Cl)cc1	6.05552	6.20066	-0.145142	CHEMBL4424466	CHEMBL4424466	TRUE
O=C(Nc1cccc(F)c1)NC(CCC(=O)N1CCN(c2nsc3ccccc23)CC1)C(=O)N1CCN(c2nsc3ccccc23)CC1	O=C(Nc1cccc(Cl)c1)NC(CCC(=O)N1CCN(c2nsc3ccccc23)CC1)C(=O)N1CCN(c2nsc3ccccc23)CC1	4.10791	4.25181	-0.143907	CHEMBL2404396	CHEMBL2404396	TRUE
NC1=NC2(CCOCC2)N(OCCCOc2ccc(F)cc2)C(N)=N1	NC1=NC2(CCOCC2)N(OCCCOc2ccc(Cl)cc2)C(N)=N1	7.33143	7.47418	-0.14275	CHEMBL3878855	CHEMBL3878855	TRUE
Cc1cc(NN)n2nc(SCc3ccc(F)cc3)nc2n1	Cc1cc(NN)n2nc(SCc3ccc(Cl)cc3)nc2n1	5.08991	5.23136	-0.141452	CHEMBL4401328	CHEMBL4401328	TRUE
O=C(CCc1csc(CCc2ccc(F)cc2)n1)NO	O=C(CCc1csc(CCc2ccc(Cl)cc2)n1)NO	7.67305	7.81446	-0.141408	CHEMBL4390356	CHEMBL4390356	TRUE
O=C(C=CC=Cc1ccccc1)c1cc(F)ccc1O	O=C(C=CC=Cc1ccccc1)c1cc(Cl)ccc1O	7.1201	7.26146	-0.141356	CHEMBL2342563	CHEMBL2342563	TRUE
O=C(Nc1ccc(F)cc1)NC(CCC(=O)N1CCN(c2nsc3ccccc23)CC1)C(=O)N1CCN(c2nsc3ccccc23)CC1	O=C(Nc1ccc(Cl)cc1)NC(CCC(=O)N1CCN(c2nsc3ccccc23)CC1)C(=O)N1CCN(c2nsc3ccccc23)CC1	4.14267	4.284	-0.141329	CHEMBL2404396	CHEMBL2404396	TRUE
CCOc1ccc(OCC2c3ccc(OC(C)C)cc3CCN2C(=O)c2ccc(F)c(F)c2)cc1	CCOc1ccc(OCC2c3ccc(OC(C)C)cc3CCN2C(=O)c2ccc(F)c(Cl)c2)cc1	5.74473	5.88606	-0.141329	CHEMBL4012829	CHEMBL4012829	TRUE
O=S(=O)(C=Cc1ccc(Cl)cn1)c1ccc(F)cc1	O=S(=O)(C=Cc1ccc(Cl)cn1)c1ccc(Cl)cc1	5.35942	5.50004	-0.140619	CHEMBL4712767	CHEMBL4712767	TRUE
NS(=O)(=O)c1ccc(CCNC(=O)NS(=O)(=O)c2ccc(F)cc2)cc1	NS(=O)(=O)c1ccc(CCNC(=O)NS(=O)(=O)c2ccc(Cl)cc2)cc1	8.23657	8.37675	-0.140179	CHEMBL3389583	CHEMBL3389583	TRUE
CCNC(=O)Nc1cn(-c2ncc(F)cn2)c2cc(-c3cccnc3)cnc12	CCNC(=O)Nc1cn(-c2ncc(Cl)cn2)c2cc(-c3cccnc3)cnc12	6.8962	7.03621	-0.140016	CHEMBL3737854	CHEMBL3737854	TRUE
O=C(O)C1CCCN(CCON=Cc2ccccc2-c2ccc(F)cc2F)C1	O=C(O)C1CCCN(CCON=Cc2ccccc2-c2ccc(F)cc2Cl)C1	7.86012	8	-0.139879	CHEMBL4401746	CHEMBL4401746	TRUE
O=C(Cn1c(=O)oc2ccccc21)c1ccc(F)cc1	O=C(Cn1c(=O)oc2ccccc21)c1ccc(Cl)cc1	4.27466	4.4133	-0.13864	CHEMBL4191920	CHEMBL4191920	TRUE
CCCS(=O)(=O)Nc1ccc(F)c(N(C)c2ccc3ncn(C)c(=O)c3c2)c1F	CCCS(=O)(=O)Nc1ccc(F)c(N(C)c2ccc3ncn(C)c(=O)c3c2)c1Cl	7.95861	8.09691	-0.138303	CHEMBL3240201	CHEMBL3240201	TRUE
C/C(=C\c1ccc2ccccc2c1F)C(=O)Nc1ccc(F)cc1C(=O)O	C/C(=C\c1ccc2ccccc2c1Cl)C(=O)Nc1ccc(F)cc1C(=O)O	7.35655	7.49485	-0.138303	CHEMBL5128103	CHEMBL5128103	TRUE
COc1cccc2cc[n+](-c3ccc(F)cc3)cc12	COc1cccc2cc[n+](-c3ccc(Cl)cc3)cc12	3.84466	3.98297	-0.138303	CHEMBL4770654	CHEMBL4770654	TRUE
Fc1ccc(CN2CCN(c3nnc(Nc4ccc(N5CCOCC5)cc4)c4ccccc34)CC2)cc1Cl	Clc1ccc(CN2CCN(c3nnc(Nc4ccc(N5CCOCC5)cc4)c4ccccc34)CC2)cc1Cl	5.12552	5.26201	-0.136494	CHEMBL4832361	CHEMBL4832361	TRUE
O=C(c1nnc2ccc(F)cn12)N1CC2CC(c3ccccc3C(F)(F)F)CC2C1	O=C(c1nnc2ccc(Cl)cn12)N1CC2CC(c3ccccc3C(F)(F)F)CC2C1	7.1707	7.30715	-0.136457	CHEMBL4305281	CHEMBL4305281	TRUE
O=C1OCC(O)=C1c1cccc(F)c1	O=C1OCC(O)=C1c1cccc(Cl)c1	4.20761	4.3439	-0.136293	CHEMBL3602335	CHEMBL3602335	TRUE
O=C1OCC(O)=C1c1cccc(F)c1	O=C1OCC(O)=C1c1cccc(Cl)c1	4.20761	4.3439	-0.136293	CHEMBL3602335	CHEMBL3602335	TRUE
O=S(=O)(C=Cc1cccnc1)c1cccc(F)c1	O=S(=O)(C=Cc1cccnc1)c1cccc(Cl)c1	5.31695	5.45321	-0.136258	CHEMBL4712767	CHEMBL4712767	TRUE
Cn1c(Cn2ccc(C(F)(F)F)c(Oc3ccc(-c4cc(F)cc(C#N)c4)cc3F)c2=O)n[nH]c1=O	Cn1c(Cn2ccc(C(F)(F)F)c(Oc3ccc(-c4cc(F)cc(C#N)c4)cc3Cl)c2=O)n[nH]c1=O	5.2233	5.35952	-0.13622	CHEMBL5117642	CHEMBL5117642	TRUE
COc1ccc(CCN(CCCc2ccccc2F)CCc2ccc3c(c2)OCO3)cc1OC	COc1ccc(CCN(CCCc2ccccc2Cl)CCc2ccc3c(c2)OCO3)cc1OC	6.86967	7.00436	-0.134699	CHEMBL3816818	CHEMBL3816818	TRUE
CC(C)(C)c1ccc(C(=O)C(C#N)=NNc2cc(F)cc(Cl)c2)cc1	CC(C)(C)c1ccc(C(=O)C(C#N)=NNc2cc(Cl)cc(Cl)c2)cc1	5.46852	5.60206	-0.133539	CHEMBL4181270	CHEMBL4181270	TRUE
Fc1cccc(OCc2nnc(SC3CCCC3)n2-c2cccnc2)c1	Clc1cccc(OCc2nnc(SC3CCCC3)n2-c2cccnc2)c1	6.42136	6.5544	-0.133035	CHEMBL2317274	CHEMBL2317274	TRUE
CN1CCN(Cc2ccc(-c3cnc4[nH]cc(-c5ccc(F)cc5)c4c3)cc2)CC1	CN1CCN(Cc2ccc(-c3cnc4[nH]cc(-c5ccc(Cl)cc5)c4c3)cc2)CC1	7.72125	7.85387	-0.132626	CHEMBL4679411	CHEMBL4679411	TRUE
O=C(NN=Cc1cccc(F)c1)c1nc2ccccc2[nH]1	O=C(NN=Cc1cccc(Cl)c1)c1nc2ccccc2[nH]1	4.56543	4.6968	-0.131373	CHEMBL4618028	CHEMBL4618028	TRUE
COc1cc2nc(NC(=O)CN3CCN(Cc4ccc(F)cc4)CC3)sc2cc1OC	COc1cc2nc(NC(=O)CN3CCN(Cc4ccc(Cl)cc4)CC3)sc2cc1OC	6.75597	6.88706	-0.13109	CHEMBL3865132	CHEMBL3865132	TRUE
COc1cc(C23c4ccccc4C(=O)N2CCN3C(=O)c2ccc(F)c(F)c2)ccc1F	COc1cc(C23c4ccccc4C(=O)N2CCN3C(=O)c2ccc(F)c(F)c2)ccc1Cl	5.56864	5.69897	-0.130334	CHEMBL3380864	CHEMBL3380864	TRUE
Cn1cc(-c2ccn3c(-c4ccc(-c5ccc(F)cc5)s4)cnc3c2)cn1	Cn1cc(-c2ccn3c(-c4ccc(-c5ccc(Cl)cc5)s4)cnc3c2)cn1	6.56864	6.69897	-0.130334	CHEMBL4831021	CHEMBL4831021	TRUE
CN(C(=O)C1CCN(C(=O)N[CH](CC(=O)NCC(C)(C)C)C(=O)N[CH](CCc2ccccc2)C(=O)N[CH]2CCCc3ccccc32)CC1)c1ccc(F)cc1	CN(C(=O)C1CCN(C(=O)N[CH](CC(=O)NCC(C)(C)C)C(=O)N[CH](CCc2ccccc2)C(=O)N[CH]2CCCc3ccccc32)CC1)c1ccc(Cl)cc1	8.0278	8.15802	-0.130218	CHEMBL5159800	CHEMBL5159800	TRUE
Fc1ccc(COC2CCN(Cc3ncc4ccccn34)CC2)cc1F	Fc1cc(COC2CCN(Cc3ncc4ccccn34)CC2)ccc1Cl	6.66999	6.8	-0.130006	CHEMBL5145660	CHEMBL5145660	TRUE
Cc1noc(C)c1-c1cc(O)cc(C(O)c2ccc(F)cc2)c1	Cc1noc(C)c1-c1cc(O)cc(C(O)c2ccc(Cl)cc2)c1	6.07	6.19997	-0.129972	CHEMBL4123151	CHEMBL4123151	TRUE
O=C(c1ccc(-c2cccc(F)c2)o1)n1cncn1	O=C(c1ccc(-c2cccc(Cl)c2)o1)n1cncn1	4.5544	4.68403	-0.129634	CHEMBL3826277	CHEMBL3826277	TRUE
Cc1cccn2c(=O)c3cc(C(=O)NCCCN4CCOCC4)c(=N)n(CCc4ccc(F)cc4)c3nc12	Cc1cccn2c(=O)c3cc(C(=O)NCCCN4CCOCC4)c(=N)n(CCc4ccc(Cl)cc4)c3nc12	5.50864	5.63827	-0.129634	CHEMBL4406289	CHEMBL4406289	TRUE
CCN(CC)CCCNc1nc(C=Cc2ccc(OC)cc2)nc2ccc(F)cc12	CCN(CC)CCCNc1nc(C=Cc2ccc(OC)cc2)nc2ccc(Cl)cc12	5.46725	5.59688	-0.129634	CHEMBL4315097	CHEMBL4315097	TRUE
CC1=C(c2ncnn2-c2cccc(F)n2)C(c2ccc(Cl)c(Cl)c2)n2nc(C(F)(F)F)cc2N1	CC1=C(c2ncnn2-c2cccc(Cl)n2)C(c2ccc(Cl)c(Cl)c2)n2nc(C(F)(F)F)cc2N1	6.59176	6.72125	-0.129486	CHEMBL2340853	CHEMBL2340853	TRUE
COc1cc(OC)c(C(=O)C=Cc2cccc(F)c2)c(O)c1CC=C(C)C	COc1cc(OC)c(C(=O)C=Cc2cccc(Cl)c2)c(O)c1CC=C(C)C	4.89825	5.02733	-0.129081	CHEMBL4361914	CHEMBL4361914	TRUE
COC(=O)c1c(O)cc(O)c(Cl)c1CCc1nccn1Cc1ccccc1F	COC(=O)c1c(O)cc(O)c(Cl)c1CCc1nccn1Cc1ccccc1Cl	4.9431	5.07212	-0.129021	CHEMBL3806601	CHEMBL3806601	TRUE
CCCS(=O)(=O)Nc1ccc(F)c(C(=O)Nc2cnc3cc(-c4ccc(F)cc4)nn3c2)c1F	CCCS(=O)(=O)Nc1ccc(F)c(C(=O)Nc2cnc3cc(-c4ccc(Cl)cc4)nn3c2)c1F	7.95861	8.08619	-0.127579	CHEMBL2438530	CHEMBL2438530	TRUE
O=C(NN=Cc1ccc(F)cc1)c1ccc(-c2nc3ccccc3s2)cc1	O=C(NN=Cc1ccc(Cl)cc1)c1ccc(-c2nc3ccccc3s2)cc1	5.14752	5.27491	-0.127385	CHEMBL3411113	CHEMBL3411113	TRUE
COc1ccccc1N1CCN(CCCCC(=O)NCc2ccccc2-c2ccc(F)cc2)CC1	COc1ccccc1N1CCN(CCCCC(=O)NCc2ccccc2-c2ccc(Cl)cc2)CC1	7.45967	7.5867	-0.12703	CHEMBL3365905	CHEMBL3365905	TRUE
Cc1ccc(-n2nc(COC(=O)COc3cc(O)c4c(=O)cc(-c5ccccc5)oc4c3)cc2-c2ccc(F)cc2)cc1	Cc1ccc(-n2nc(COC(=O)COc3cc(O)c4c(=O)cc(-c5ccccc5)oc4c3)cc2-c2ccc(Cl)cc2)cc1	5.54668	5.67366	-0.126982	CHEMBL4234507	CHEMBL4234507	TRUE
CN(C)CCNc1nc(C=Cc2ccc(F)c(F)c2)nc2ccc(F)cc12	CN(C)CCNc1nc(C=Cc2ccc(F)c(F)c2)nc2ccc(Cl)cc12	5.56067	5.68613	-0.125465	CHEMBL4315097	CHEMBL4315097	TRUE
CCN(c1cc2oc(-c3ccc(F)cc3)c(C(=O)NC)c2cc1-c1cc(F)c(OC)c(C(=O)NC2(c3ncccn3)CC2)c1)S(C)(=O)=O	CCN(c1cc2oc(-c3ccc(F)cc3)c(C(=O)NC)c2cc1-c1cc(Cl)c(OC)c(C(=O)NC2(c3ncccn3)CC2)c1)S(C)(=O)=O	8.05552	8.18046	-0.124939	CHEMBL4329902	CHEMBL4329902	TRUE
O=C(CC(=O)NC1CCOC1=O)Cc1ccc(F)cc1	O=C(CC(=O)NC1CCOC1=O)Cc1ccc(Cl)cc1	5.39794	5.52288	-0.124939	CHEMBL4404062	CHEMBL4404062	TRUE
Cn1c(C2CC2)nc2ccc(-n3ccc(OCc4ccc(F)cc4)cc3=O)cc21	Cn1c(C2CC2)nc2ccc(-n3ccc(OCc4ccc(Cl)cc4)cc3=O)cc21	7.55284	7.67778	-0.124939	CHEMBL3796861	CHEMBL3796861	TRUE
O=S(=O)(NC1CC1)c1ccc(-c2ccsc2)c(Nc2nc3ccc(F)c(F)c3[nH]2)c1	O=S(=O)(NC1CC1)c1ccc(-c2ccsc2)c(Nc2nc3ccc(F)c(Cl)c3[nH]2)c1	4.86012	4.98506	-0.124939	CHEMBL4628662	CHEMBL4628662	TRUE
C#CCNC1CCc2c(SCc3ccc(F)cc3)cccc21	C#CCNC1CCc2c(SCc3ccc(Cl)cc3)cccc21	6.61979	6.74473	-0.124939	CHEMBL4320999	CHEMBL4320999	TRUE
CC1C=C(C2=Nc3cc(Cl)ccc3Nc3ccc(F)cc32)CCN1C	CC1C=C(C2=Nc3cc(Cl)ccc3Nc3ccc(Cl)cc32)CCN1C	5.92082	6.04576	-0.124939	CHEMBL4671572	CHEMBL4671572	TRUE
CN1CCN(C)C(c2ccc(Nc3nc(-c4cccc(NC(=O)c5cc6c(s5)CCCC6)c4F)cn(C)c3=O)cc2)C1=O	CN1CCN(C)C(c2ccc(Nc3nc(-c4cccc(NC(=O)c5cc6c(s5)CCCC6)c4Cl)cn(C)c3=O)cc2)C1=O	8.09691	8.22185	-0.124939	CHEMBL3748501	CHEMBL3748501	TRUE
Cc1ccc(C(=O)C=Cc2cccc(F)c2)o1	Cc1ccc(C(=O)C=Cc2cccc(Cl)c2)o1	4.61979	4.74473	-0.124939	CHEMBL2421972	CHEMBL2421972	TRUE
O=C(C=Cc1ccc(C=C(C(=O)NC2CC2)c2cccc(F)c2)cc1)NO	O=C(C=Cc1ccc(C=C(C(=O)NC2CC2)c2cccc(Cl)c2)cc1)NO	7.39794	7.52288	-0.124939	CHEMBL3760252	CHEMBL3760252	TRUE
O=C1Nc2ccccc2C1=Cc1cc[n+](Cc2c(F)cccc2Cl)cc1	O=C1Nc2ccccc2C1=Cc1cc[n+](Cc2c(Cl)cccc2Cl)cc1	5.69897	5.82391	-0.124939	CHEMBL3365680	CHEMBL3365680	TRUE
N#Cc1c(N)nc(SCc2coc(-c3ccc(F)cc3)n2)nc1-c1ccc2c(c1)OCO2	N#Cc1c(N)nc(SCc2coc(-c3ccc(Cl)cc3)n2)nc1-c1ccc2c(c1)OCO2	7.69897	7.82391	-0.124939	CHEMBL3240796	CHEMBL3240796	TRUE
O=C(NO)c1ccc(CN2CCCc3cc(Cl)c(F)cc32)cc1	O=C(NO)c1ccc(CN2CCCc3cc(Cl)c(Cl)cc32)cc1	8.31876	8.4437	-0.124939	CHEMBL4823880	CHEMBL4823880	TRUE
O=C(NCc1cc(F)cc(F)c1)C1(O)CCN(c2ccccc2)C1=O	O=C(NCc1cc(F)cc(Cl)c1)C1(O)CCN(c2ccccc2)C1=O	7.09691	7.22185	-0.124939	CHEMBL4397057	CHEMBL4397057	TRUE
CCC(C)Oc1cc(NC(=O)/C(C#N)=C(/C)O)c(F)cc1-c1cccc(F)c1	CCC(C)Oc1cc(NC(=O)/C(C#N)=C(/C)O)c(F)cc1-c1cccc(Cl)c1	7.57187	7.6968	-0.124939	CHEMBL5140113	CHEMBL5140113	TRUE
O=C(N/N=C/c1ccccc1F)c1ccc(CN2CCC(CO)CC2)cc1	O=C(N/N=C/c1ccccc1Cl)c1ccc(CN2CCC(CO)CC2)cc1	4.92082	5.04576	-0.124939	CHEMBL5109574	CHEMBL5109574	TRUE
CCOC(=O)c1cc(-c2ccc(F)cc2)n(-c2ccc(S(N)(=O)=O)cc2)c1	CCOC(=O)c1cc(-c2ccc(Cl)cc2)n(-c2ccc(S(N)(=O)=O)cc2)c1	6.39794	6.52288	-0.124939	CHEMBL4737248	CHEMBL4737248	TRUE
CCN(CC)S(=O)(=O)c1ccc(C=Cc2nc3cc(F)ccc3s2)cc1	CCN(CC)S(=O)(=O)c1ccc(C=Cc2nc3cc(Cl)ccc3s2)cc1	4.39794	4.52288	-0.124939	CHEMBL4275280	CHEMBL4275280	TRUE
CCc1nc2c(N3CCNCC3)ccnc2n1CCc1cccc(F)c1	CCc1nc2c(N3CCNCC3)ccnc2n1CCc1cccc(Cl)c1	7.25181	7.37675	-0.124939	CHEMBL4146371	CHEMBL4146371	TRUE
Cc1ccc(C2Cc3c(C#N)c(N)c(C#N)c(-c4ccc(F)cc4)c3S2)cc1	Cc1ccc(C2Cc3c(C#N)c(N)c(C#N)c(-c4ccc(Cl)cc4)c3S2)cc1	4.74208	4.86646	-0.12438	CHEMBL2351003	CHEMBL2351003	TRUE
CCCCCn1cc(-c2cccc(F)c2)nc1N	CCCCCn1cc(-c2cccc(Cl)c2)nc1N	5.59007	5.71444	-0.124376	CHEMBL4765504	CHEMBL4765504	TRUE
COc1cc2c(cc1OC)CN(C(=O)c1ccc(-c3ccccc3F)o1)CC2	COc1cc2c(cc1OC)CN(C(=O)c1ccc(-c3ccccc3Cl)o1)CC2	4.96297	5.08725	-0.124275	CHEMBL4153366	CHEMBL4153366	TRUE
CC(C)C[CH](NC(=O)[CH](NC(=O)c1ccc(F)cc1)C(C)C)C(=O)N[CH](C=O)C[CH]1CCCNC1=O	CC(C)C[CH](NC(=O)[CH](NC(=O)c1ccc(Cl)cc1)C(C)C)C(=O)N[CH](C=O)C[CH]1CCCNC1=O	6.70553	6.82974	-0.124205	CHEMBL5139999	CHEMBL5139999	TRUE
Cc1ncnc(C)c1C(=O)NCCC(C)N1CCC(N2C(=O)N(C3CCCCC3)CC2c2cccc(F)c2)CC1	Cc1ncnc(C)c1C(=O)NCCC(C)N1CCC(N2C(=O)N(C3CCCCC3)CC2c2cccc(Cl)c2)CC1	7.5867	7.70997	-0.123265	CHEMBL2439742	CHEMBL2439742	TRUE
O=C(C=Cc1ccc(CN2C(=O)C(=C3Nc4ccccc4C3=NO)c3cc(F)ccc32)cc1)NO	O=C(C=Cc1ccc(CN2C(=O)C(=C3Nc4ccccc4C3=NO)c3cc(Cl)ccc32)cc1)NO	6.37469	6.49757	-0.122885	CHEMBL4702018	CHEMBL4702018	TRUE
COc1cc(C=Cc2nnc(NC(=O)c3ccc(F)cc3)s2)c(Br)c(OC)c1OC	COc1cc(C=Cc2nnc(NC(=O)c3ccc(Cl)cc3)s2)c(Br)c(OC)c1OC	4.80604	4.92775	-0.121709	CHEMBL3367650	CHEMBL3367650	TRUE
Cc1ccnc(NC(c2ccccc2F)c2ccc3cccnc3c2O)c1	Cc1ccnc(NC(c2ccccc2Cl)c2ccc3cccnc3c2O)c1	4.88273	5.00436	-0.121636	CHEMBL4729814	CHEMBL4729814	TRUE
O=S(=O)(NCCCNc1nccc(-c2[nH]c(-c3ccccc3)nc2-c2ccc(F)c(O)c2)n1)c1ccccc1	O=S(=O)(NCCCNc1nccc(-c2[nH]c(-c3ccccc3)nc2-c2ccc(Cl)c(O)c2)n1)c1ccccc1	8.25026	8.37161	-0.121347	CHEMBL4738306	CHEMBL4738306	TRUE
O=CN1[CH](C(=O)Oc2ccccc2F)Cc2cc(O)c(O)cc2[CH]1Cc1ccc(O)c(O)c1	O=CN1[CH](C(=O)Oc2ccccc2Cl)Cc2cc(O)c(O)cc2[CH]1Cc1ccc(O)c(O)c1	6.4318	6.55284	-0.121044	CHEMBL5144290	CHEMBL5144290	TRUE
CCC1OC(=O)C(C)C(OC2CC(C)(OC)C(O)C(C)O2)C(C)C(OC2OC(C)CC(N(C)C)C2O)C(C)(O)CC(C)CN(CCCCc2cn(CCn3ccc4cc(F)ccc43)nn2)C(C)C(O)C1(C)O	CCC1OC(=O)C(C)C(OC2CC(C)(OC)C(O)C(C)O2)C(C)C(OC2OC(C)CC(N(C)C)C2O)C(C)(O)CC(C)CN(CCCCc2cn(CCn3ccc4cc(Cl)ccc43)nn2)C(C)C(O)C1(C)O	6.18977	6.3098	-0.120036	CHEMBL3602325	CHEMBL3602325	TRUE
CCC1OC(=O)C(C)C(OC2CC(C)(OC)C(O)C(C)O2)C(C)C(OC2OC(C)CC(N(C)C)C2O)C(C)(O)CC(C)CN(CCCCc2cn(CCn3ccc4cc(F)ccc43)nn2)C(C)C(O)C1(C)O	CCC1OC(=O)C(C)C(OC2CC(C)(OC)C(O)C(C)O2)C(C)C(OC2OC(C)CC(N(C)C)C2O)C(C)(O)CC(C)CN(CCCCc2cn(CCn3ccc4cc(Cl)ccc43)nn2)C(C)C(O)C1(C)O	6.18977	6.3098	-0.120036	CHEMBL3602325	CHEMBL3602325	TRUE
Fc1ccc(C2=NN(c3cccc(Cl)c3)C(c3cccc(Cl)c3Cl)C2)cc1	Clc1ccc(C2=NN(c3cccc(Cl)c3)C(c3cccc(Cl)c3Cl)C2)cc1	4.71693	4.83684	-0.119914	CHEMBL4056827	CHEMBL4056827	TRUE
O=S(=O)(Nc1cc(Cl)c(Oc2c(Cl)cc(Cl)cc2Cl)c(Cl)c1)c1ccc(F)cc1	O=S(=O)(Nc1cc(Cl)c(Oc2c(Cl)cc(Cl)cc2Cl)c(Cl)c1)c1ccc(Cl)cc1	6.08092	6.20066	-0.119738	CHEMBL4627627	CHEMBL4627627	TRUE
Fc1cccc(-c2nn3c(-c4ccccn4)nnc3s2)c1	Clc1cccc(-c2nn3c(-c4ccccn4)nnc3s2)c1	6.44733	6.56703	-0.119699	CHEMBL4008373	CHEMBL4008373	TRUE
O=C(Cn1cc(CSc2nnc(-c3ccccc3)c(-c3ccccc3)n2)nn1)Nc1ccc(F)cc1	O=C(Cn1cc(CSc2nnc(-c3ccccc3)c(-c3ccccc3)n2)nn1)Nc1ccc(Cl)cc1	4.67778	4.7967	-0.118914	CHEMBL4041794	CHEMBL4041794	TRUE
CCOC(=O)C1C(=O)NC(N)=NC1c1ccc(F)cc1	CCOC(=O)C1C(=O)NC(N)=NC1c1ccc(Cl)cc1	3.83983	3.95853	-0.118697	CHEMBL3292277	CHEMBL3292277	TRUE
CC(=O)Nc1ncc(CN2CCN(CC(=O)Nc3ccc(F)cc3)CC2)s1	CC(=O)Nc1ncc(CN2CCN(CC(=O)Nc3ccc(Cl)cc3)CC2)s1	5.58336	5.70115	-0.117787	CHEMBL5115654	CHEMBL5115654	TRUE
N#CC(=NNc1ccc(Cl)c(C(F)(F)F)c1)C(=O)c1cc(-c2ccc(F)cc2)on1	N#CC(=NNc1ccc(Cl)c(C(F)(F)F)c1)C(=O)c1cc(-c2ccc(Cl)cc2)on1	4.9914	5.10791	-0.116506	CHEMBL4021027	CHEMBL4021027	TRUE
Cc1cc(NCc2c(F)ccc(F)c2Cl)c2cccc(C(N)=O)c2n1	Cc1cc(NCc2c(F)ccc(Cl)c2Cl)c2cccc(C(N)=O)c2n1	6.76955	6.88606	-0.116506	CHEMBL3607749	CHEMBL3607749	TRUE
Fc1ccc(C2CC(c3ccco3)=Nc3ccccc3S2)cc1	Clc1ccc(C2CC(c3ccco3)=Nc3ccccc3S2)cc1	4.59874	4.71474	-0.115998	CHEMBL4022504	CHEMBL4022504	TRUE
CC(C)CC(N)C(=O)NS(=O)(=O)c1cccc(NC(=O)c2ccc(F)cc2)c1	CC(C)CC(N)C(=O)NS(=O)(=O)c1cccc(NC(=O)c2ccc(Cl)cc2)c1	5.19382	5.3098	-0.115984	CHEMBL4816948	CHEMBL4816948	TRUE
Cc1cc(NCc2c(F)ccc(Cl)c2F)c2cccc(C(N)=O)c2n1	Cc1cc(NCc2c(Cl)ccc(Cl)c2F)c2cccc(C(N)=O)c2n1	5.3279	5.4437	-0.115795	CHEMBL3607749	CHEMBL3607749	TRUE
O=C(c1ccc(-c2ccccc2F)o1)N1CCCc2ccccc21	O=C(c1ccc(-c2ccccc2Cl)o1)N1CCCc2ccccc21	4.74666	4.86233	-0.115667	CHEMBL4153366	CHEMBL4153366	TRUE
O=c1c(-c2ccccc2F)c2ccccn2c(=O)n1CCCCN1CC=C(c2c[nH]c3ccc(Cl)cc23)CC1	O=c1c(-c2ccccc2Cl)c2ccccn2c(=O)n1CCCCN1CC=C(c2c[nH]c3ccc(Cl)cc23)CC1	7.01278	7.12843	-0.115646	CHEMBL3399329	CHEMBL3399329	TRUE
O=C(NCC(O)CN1CCc2ccccc2C1)c1cc2c(s1)CCN(C(=O)c1ccc(F)cc1)C2	O=C(NCC(O)CN1CCc2ccccc2C1)c1cc2c(s1)CCN(C(=O)c1ccc(Cl)cc1)C2	7.52288	7.63827	-0.115393	CHEMBL4413369	CHEMBL4413369	TRUE
N#CC1=C(N)Oc2c(c(=O)oc3ccccc23)C1c1ccc[n+](Cc2cccc(F)c2)c1	N#CC1=C(N)Oc2c(c(=O)oc3ccccc23)C1c1ccc[n+](Cc2cccc(Cl)c2)c1	4.30103	4.41567	-0.114639	CHEMBL2428568	CHEMBL2428568	TRUE
O=C(NC1CCN(S(=O)(=O)CC2CCC(NCc3ccc(F)cc3)CC2)CC1)c1cc(C2CC2)on1	O=C(NC1CCN(S(=O)(=O)CC2CCC(NCc3ccc(Cl)cc3)CC2)CC1)c1cc(C2CC2)on1	8.88606	9	-0.113943	CHEMBL4338950	CHEMBL4338950	TRUE
O=C1N(Cc2nc3cc(F)ccc3n2CCCCO)c2ccccc2C12CC2	O=C1N(Cc2nc3cc(Cl)ccc3n2CCCCO)c2ccccc2C12CC2	7.88606	8	-0.113943	CHEMBL4144864	CHEMBL4144864	TRUE
CC1(C)CN(c2ccccc2NC(=O)Nc2ccc(OC(F)(F)F)cc2)c2c(O)c(F)cc(-c3ccc(F)cc3)c21	CC1(C)CN(c2ccccc2NC(=O)Nc2ccc(OC(F)(F)F)cc2)c2c(O)c(F)cc(-c3ccc(Cl)cc3)c21	6.40894	6.52288	-0.113943	CHEMBL3365973	CHEMBL3365973	TRUE
Cc1ccc(-c2cn(Cc3ccc(F)cc3F)nn2)cc1C(=O)NCCN1CCOCC1	Cc1ccc(-c2cn(Cc3ccc(F)cc3Cl)nn2)cc1C(=O)NCCN1CCOCC1	4.04789	4.16147	-0.11358	CHEMBL4479286	CHEMBL4479286	TRUE
NS(=O)(=O)c1ccc(NC(=S)NC(=O)c2cccc(F)c2)cc1	NS(=O)(=O)c1ccc(NC(=S)NC(=O)c2cccc(Cl)c2)cc1	5.06048	5.17393	-0.113444	CHEMBL3293542	CHEMBL3293542	TRUE
O=C(CCC(NC(=S)Nc1ccc(F)cc1)C(=O)N1CCN(c2nsc3ccccc23)CC1)N1CCN(c2nsc3ccccc23)CC1	O=C(CCC(NC(=S)Nc1ccc(Cl)cc1)C(=O)N1CCN(c2nsc3ccccc23)CC1)N1CCN(c2nsc3ccccc23)CC1	4.1549	4.26761	-0.112704	CHEMBL2404396	CHEMBL2404396	TRUE
O=S(=O)(Nc1ccc(Oc2ccccc2)cc1)c1cccc(F)c1	O=S(=O)(Nc1ccc(Oc2ccccc2)cc1)c1cccc(Cl)c1	6.65758	6.76955	-0.111974	CHEMBL3867362	CHEMBL3867362	TRUE
COc1cc(C(=O)c2cn(-c3ccc(F)cc3)cc2-c2ccccc2F)cc(OC)c1OC	COc1cc(C(=O)c2cn(-c3ccc(F)cc3)cc2-c2ccccc2Cl)cc(OC)c1OC	6.18046	6.29243	-0.111974	CHEMBL4316276	CHEMBL4316276	TRUE
O=C(CNS(=O)(=O)c1ccc(-c2ccc(F)cc2)cc1)NO	O=C(CNS(=O)(=O)c1ccc(-c2ccc(Cl)cc2)cc1)NO	5.13608	5.24795	-0.111869	CHEMBL4018050	CHEMBL4018050	TRUE
O=C(CCCCCC(=O)NCc1ccc2cc(F)ccc2n1)NO	O=C(CCCCCC(=O)NCc1ccc2cc(Cl)ccc2n1)NO	6.80967	6.92082	-0.11115	CHEMBL3595062	CHEMBL3595062	TRUE
O=C(CCCCCC(=O)NCc1ccc2cc(F)ccc2n1)NO	O=C(CCCCCC(=O)NCc1ccc2cc(Cl)ccc2n1)NO	6.80967	6.92082	-0.11115	CHEMBL3595062	CHEMBL3595062	TRUE
CCOC(=O)c1c(C)nc(N2CCN(S(=O)(=O)c3ccc(N)c(F)c3)CC2)nc1-c1ccc(OC)cc1	CCOC(=O)c1c(C)nc(N2CCN(S(=O)(=O)c3ccc(N)c(Cl)c3)CC2)nc1-c1ccc(OC)cc1	6.9974	7.10841	-0.111005	CHEMBL4738011	CHEMBL4738011	TRUE
C=CC(=O)N(c1ccc(F)cc1F)c1ncnc2cc(OC)c(OCCCN3CCOCC3)cc12	C=CC(=O)N(c1ccc(Cl)cc1F)c1ncnc2cc(OC)c(OCCCN3CCOCC3)cc12	6.51999	6.63078	-0.110791	CHEMBL4385373	CHEMBL4385373	TRUE
O=C(Nc1ncc(F)s1)C(CC1CCOCC1)n1ncc2c(S(=O)(=O)C3CC3)cccc21	O=C(Nc1ncc(Cl)s1)C(CC1CCOCC1)n1ncc2c(S(=O)(=O)C3CC3)cccc21	7.39794	7.50864	-0.110698	CHEMBL4022283	CHEMBL4022283	TRUE
O=S1(=O)CC(c2ccc(F)cc2)c2c(C3CC3)nn(-c3ccccc3F)c2O1	O=S1(=O)CC(c2ccc(F)cc2)c2c(C3CC3)nn(-c3ccccc3Cl)c2O1	5.11014	5.2204	-0.110265	CHEMBL4408391	CHEMBL4408391	TRUE
Fc1ccc(N2CCN(CCCn3nnnc3C(c3ccccc3)c3ccccc3)CC2)c(F)c1	Fc1cc(Cl)ccc1N1CCN(CCCn2nnnc2C(c2ccccc2)c2ccccc2)CC1	5.5376	5.64782	-0.110215	CHEMBL4433104	CHEMBL4433104	TRUE
O=C(c1ccc(Cl)cc1)C1CCN(C(=O)c2ccccc2F)CC1	O=C(c1ccc(Cl)cc1)C1CCN(C(=O)c2ccccc2Cl)CC1	4.8729	4.98297	-0.110071	CHEMBL4681616	CHEMBL4681616	TRUE
Cc1ccsc1C(=CCCN(C)C(CCO)C(=O)NCc1ccc(F)cc1)c1sccc1C	Cc1ccsc1C(=CCCN(C)C(CCO)C(=O)NCc1ccc(Cl)cc1)c1sccc1C	5.05	5.16	-0.11	CHEMBL4767558	CHEMBL4767558	TRUE
Cc1ccc(-c2ccnc(C(=O)O)n2)cc1F	Cc1ccc(-c2ccnc(C(=O)O)n2)cc1Cl	9.04576	9.1549	-0.109144	CHEMBL3871819	CHEMBL3871819	TRUE
NS(=O)(=O)c1ccc(-n2nc(-c3ccc(F)cc3O)nc2-c2ccccc2O)cc1	NS(=O)(=O)c1ccc(-n2nc(-c3ccc(Cl)cc3O)nc2-c2ccccc2O)cc1	4.33564	4.44382	-0.108178	CHEMBL4685156	CHEMBL4685156	TRUE
O=C1NC(=S)NC1=Cc1ccc(-c2ccc(F)cc2)s1	O=C1NC(=S)NC1=Cc1ccc(-c2ccc(Cl)cc2)s1	5.17457	5.28233	-0.107756	CHEMBL3106784	CHEMBL3106784	TRUE
Cn1cc(C2=C(c3nnc4ccccn34)C(=O)NC2=O)c2ccc(F)cc21	Cn1cc(C2=C(c3nnc4ccccn34)C(=O)NC2=O)c2ccc(Cl)cc21	6.69016	6.79778	-0.107627	CHEMBL3398953	CHEMBL3398953	TRUE
Cn1cc(C2=C(c3nnc4ccccn34)C(=O)NC2=O)c2ccc(F)cc21	Cn1cc(C2=C(c3nnc4ccccn34)C(=O)NC2=O)c2ccc(Cl)cc21	6.69016	6.79778	-0.107627	CHEMBL3398953	CHEMBL3398953	TRUE
Cc1cc(F)cc(C)c1C(=O)c1sc2cc(O)ccc2c1Oc1ccc(C=CC(=O)O)cc1	Cc1cc(Cl)cc(C)c1C(=O)c1sc2cc(O)ccc2c1Oc1ccc(C=CC(=O)O)cc1	9.13668	9.24413	-0.107448	CHEMBL3998977	CHEMBL3998977	TRUE
CC(C(=O)NCc1ccc(C(F)(F)F)nc1N(Cc1ccc(F)cc1)S(=O)(=O)c1ccccc1)c1ccc(NS(C)(=O)=O)c(F)c1	CC(C(=O)NCc1ccc(C(F)(F)F)nc1N(Cc1ccc(Cl)cc1)S(=O)(=O)c1ccccc1)c1ccc(NS(C)(=O)=O)c(F)c1	8.13253	8.23882	-0.106292	CHEMBL3772450	CHEMBL3772450	TRUE
Fc1ccc(Nc2nc(-c3ccccc3)nc3ccccc23)cc1	Clc1ccc(Nc2nc(-c3ccccc3)nc3ccccc23)cc1	5.97469	6.08092	-0.106228	CHEMBL4425525	CHEMBL4425525	TRUE
O=C(O)c1ccc(N(Cc2ccc(C3CCCCC3)cc2)C(=O)CN(Cc2ccc(F)cc2)S(=O)(=O)c2c(F)c(F)c(F)c(F)c2F)cc1O	O=C(O)c1ccc(N(Cc2ccc(C3CCCCC3)cc2)C(=O)CN(Cc2ccc(Cl)cc2)S(=O)(=O)c2c(F)c(F)c(F)c(F)c2F)cc1O	4.75449	4.86012	-0.105634	CHEMBL2434703	CHEMBL2434703	TRUE
O=C(c1cc(Cc2n[nH]c(=O)c3ccccc23)ccc1F)N1CCn2c(nc3ccc(F)cc32)C1	O=C(c1cc(Cc2n[nH]c(=O)c3ccccc23)ccc1F)N1CCn2c(nc3ccc(Cl)cc32)C1	9.29243	9.39794	-0.10551	CHEMBL4823042	CHEMBL4823042	TRUE
O=c1ncn(Cc2ccc(F)cc2F)c2ccc(Oc3ncccc3C(F)(F)F)cc12	O=c1ncn(Cc2ccc(Cl)cc2F)c2ccc(Oc3ncccc3C(F)(F)F)cc12	6.29243	6.39794	-0.10551	CHEMBL2405555	CHEMBL2405555	TRUE
CN(c1ncnc2[nH]c3cc(F)ccc3c12)C1CCCN(CCC#N)C1	CN(c1ncnc2[nH]c3cc(Cl)ccc3c12)C1CCCN(CCC#N)C1	6.01189	6.11691	-0.105019	CHEMBL5046564	CHEMBL5046564	TRUE
O=C(COc1ccc(-c2cccc(F)c2)cc1)Cn1nnc2ccccc21	O=C(COc1ccc(-c2cccc(Cl)c2)cc1)Cn1nnc2ccccc21	7.85387	7.95861	-0.104735	CHEMBL3874926	CHEMBL3874926	TRUE
O=C(NC1CCNCC1)c1n[nH]cc1NC(=O)c1c(F)cccc1F	O=C(NC1CCNCC1)c1n[nH]cc1NC(=O)c1c(F)cccc1Cl	6.85387	6.95861	-0.104735	CHEMBL4151776	CHEMBL4151776	TRUE
Fc1cccc(Nc2nc(N3CCOCC3)c3nc[nH]c3n2)c1	Clc1cccc(Nc2nc(N3CCOCC3)c3nc[nH]c3n2)c1	5.4437	5.54821	-0.104516	CHEMBL4153910	CHEMBL4153910	TRUE
O=C(NC(C(=O)O)c1ccccc1)c1cccc2c1-c1ccc(F)cc1C2=O	O=C(NC(C(=O)O)c1ccccc1)c1cccc2c1-c1ccc(Cl)cc1C2=O	3.17457	3.27737	-0.102792	CHEMBL5217615	CHEMBL5217615	TRUE
CCOC(=O)C1C(=O)NC(NC(C)=O)=NC1c1ccccc1F	CCOC(=O)C1C(=O)NC(NC(C)=O)=NC1c1ccccc1Cl	4.33292	4.43569	-0.102768	CHEMBL3292277	CHEMBL3292277	TRUE
CC1(C)CCN(C2C3CC4CC2CC(O)(C4)C3)C(=O)c2cnn(-c3ccc(F)cc3)c21	CC1(C)CCN(C2C3CC4CC2CC(O)(C4)C3)C(=O)c2cnn(-c3ccc(Cl)cc3)c21	8.42022	8.52288	-0.102662	CHEMBL2342884	CHEMBL2342884	TRUE
COc1ccc(OC)c2c1c(OC)cc1c(=O)cc(-c3cccc(F)n3)oc12	COc1ccc(OC)c2c1c(OC)cc1c(=O)cc(-c3cccc(Cl)n3)oc12	9.42022	9.52288	-0.102662	CHEMBL4733548	CHEMBL4733548	TRUE
Cc1cc2nc(-c3ccc(-c4nnc(-c5ccccc5F)o4)cc3)[nH]c2cc1C	Cc1cc2nc(-c3ccc(-c4nnc(-c5ccccc5Cl)o4)cc3)[nH]c2cc1C	4.7176	4.81987	-0.10227	CHEMBL3588057	CHEMBL3588057	TRUE
Cc1cc2nc(-c3ccc(-c4nnc(-c5ccccc5F)o4)cc3)[nH]c2cc1C	Cc1cc2nc(-c3ccc(-c4nnc(-c5ccccc5Cl)o4)cc3)[nH]c2cc1C	4.7176	4.81987	-0.10227	CHEMBL3588057	CHEMBL3588057	TRUE
COC(=O)c1ccc(C2C(C(=O)c3cccc(F)c3)=C(O)C(=O)N2CCc2c[nH]c3ccccc23)cc1	COC(=O)c1ccc(C2C(C(=O)c3cccc(Cl)c3)=C(O)C(=O)N2CCc2c[nH]c3ccccc23)cc1	4.95861	5.06048	-0.101873	CHEMBL3241939	CHEMBL3241939	TRUE
COC(=O)N1CCN(C(=O)Cc2ccc(Cl)c(F)c2)C2C(N3CCC(O)C3)CCCC21	COC(=O)N1CCN(C(=O)Cc2ccc(Cl)c(Cl)c2)C2C(N3CCC(O)C3)CCCC21	6.60206	6.70333	-0.101275	CHEMBL4009144	CHEMBL4009144	TRUE
O=C(C1CCCN1C(=O)Nc1ccc(F)cc1)N1CCC(c2noc3cc(F)ccc23)CC1	O=C(C1CCCN1C(=O)Nc1ccc(Cl)cc1)N1CCC(c2noc3cc(F)ccc23)CC1	4.11862	4.21968	-0.101067	CHEMBL2319454	CHEMBL2319454	TRUE
COc1ccn2c(C(C)=O)cc(C(=O)Nc3cc(F)cc(-c4cnn(C)c4)c3F)c2c1	COc1ccn2c(C(C)=O)cc(C(=O)Nc3cc(Cl)cc(-c4cnn(C)c4)c3F)c2c1	7.15708	7.25782	-0.100746	CHEMBL5156554	CHEMBL5156554	TRUE
N#CC=Cc1cc(F)cc(Oc2ccc(OS(=O)(=O)F)cc2OCCn2ccc(=O)[nH]c2=O)c1	N#CC=Cc1cc(Cl)cc(Oc2ccc(OS(=O)(=O)F)cc2OCCn2ccc(=O)[nH]c2=O)c1	6.82391	6.92445	-0.100544	CHEMBL4679904	CHEMBL4679904	TRUE
O=C(Nc1ccc2[nH]ncc2n1)C1CCCN1C(=O)C1(c2ccc(F)cc2)CCC1	O=C(Nc1ccc2[nH]ncc2n1)C1CCCN1C(=O)C1(c2ccc(Cl)cc2)CCC1	9.89997	10	-0.100026	CHEMBL5217994	CHEMBL5217994	TRUE
CN1CCC(S(=O)(=O)c2c(Cl)ccc(NC(=O)Nc3cccc(F)c3Cl)c2O)CC1	CN1CCC(S(=O)(=O)c2c(Cl)ccc(NC(=O)Nc3cccc(Cl)c3Cl)c2O)CC1	4	4.1	-0.1	CHEMBL3821620	CHEMBL3821620	TRUE
O=C(Cc1ccccc1F)N1CCC(c2ccccc2)C1	O=C(Cc1ccccc1Cl)N1CCC(c2ccccc2)C1	5.40894	5.50864	-0.0997029	CHEMBL4182167	CHEMBL4182167	TRUE
C=CC(=O)N1CC(NC(=O)Cn2cc(C(=O)N3CCc4c(F)cccc4C3)c3cc(Br)ccc32)C1	C=CC(=O)N1CC(NC(=O)Cn2cc(C(=O)N3CCc4c(Cl)cccc4C3)c3cc(Br)ccc32)C1	4.52288	4.6216	-0.0987234	CHEMBL4368373	CHEMBL4368373	TRUE
COc1cc(-c2nc(-c3ccccc3)c(-c3ccccc3)[nH]2)ccc1OCc1cn(Cc2ccc(F)cc2)nn1	COc1cc(-c2nc(-c3ccccc3)c(-c3ccccc3)[nH]2)ccc1OCc1cn(Cc2ccc(Cl)cc2)nn1	3.72469	3.82333	-0.0986414	CHEMBL4364176	CHEMBL4364176	TRUE
CN(C)CCNc1cc(C=Cc2ccncc2)nc2ccc(F)cc12	CN(C)CCNc1cc(C=Cc2ccncc2)nc2ccc(Cl)cc12	7.44249	7.54061	-0.0981147	CHEMBL4671338	CHEMBL4671338	TRUE
Cc1c(C(C#N)c2ccccc2F)nc(SC(C)C)[nH]c1=O	Cc1c(C(C#N)c2ccccc2Cl)nc(SC(C)C)[nH]c1=O	7.00436	7.10237	-0.0980081	CHEMBL5140369	CHEMBL5140369	TRUE
O=C(NO)c1ccc(CN2C(=O)C(=C3Nc4ccccc4C3=NO)c3cc(F)ccc32)cc1	O=C(NO)c1ccc(CN2C(=O)C(=C3Nc4ccccc4C3=NO)c3cc(Cl)ccc32)cc1	6.66154	6.75945	-0.0979072	CHEMBL4702018	CHEMBL4702018	TRUE
O=C1NC(=O)C(=Cc2cn(-c3ccccc3)nc2-c2ccc(F)cc2)S1	O=C1NC(=O)C(=Cc2cn(-c3ccccc3)nc2-c2ccc(Cl)cc2)S1	4.88941	4.98716	-0.0977525	CHEMBL4057171	CHEMBL4057171	TRUE
CCC(C)Oc1cc(NC(=O)/C(C#N)=C(/C)O)c(F)cc1-c1ccccc1F	CCC(C)Oc1cc(NC(=O)/C(C#N)=C(/C)O)c(F)cc1-c1ccccc1Cl	7.56384	7.66154	-0.0977062	CHEMBL5140113	CHEMBL5140113	TRUE
Cc1cc(F)ccc1-n1c(C)nc2ccc(C(=O)c3cnn(C)c3O)cc2c1=O	Cc1cc(Cl)ccc1-n1c(C)nc2ccc(C(=O)c3cnn(C)c3O)cc2c1=O	7.39794	7.49485	-0.09691	CHEMBL3388490	CHEMBL3388490	TRUE
CNCc1cn(S(=O)(=O)c2cncc(F)c2)c(-c2cccnc2F)c1F	CNCc1cn(S(=O)(=O)c2cncc(Cl)c2)c(-c2cccnc2F)c1F	6.69897	6.79588	-0.09691	CHEMBL4021974	CHEMBL4021974	TRUE
CCc1cccc(-c2c(F)cccc2C(O)(CCCNC(=O)OC)C2CCCN(C(=O)CCCNC)C2)c1	CCc1cccc(-c2c(Cl)cccc2C(O)(CCCNC(=O)OC)C2CCCN(C(=O)CCCNC)C2)c1	7.69897	7.79588	-0.09691	CHEMBL4179489	CHEMBL4179489	TRUE
CCN(CC)c1ncc(N(C(C)C)S(=O)(=O)c2ccc(F)cc2)c(NC(Cc2ccc(OC(=O)N(C)C)cc2)C(=O)O)n1	CCN(CC)c1ncc(N(C(C)C)S(=O)(=O)c2ccc(Cl)cc2)c(NC(Cc2ccc(OC(=O)N(C)C)cc2)C(=O)O)n1	8.30103	8.39794	-0.09691	CHEMBL2384376	CHEMBL2384376	TRUE
CN1CCC(Nc2ccc3ncc(-c4ccc(Nc5ncc(F)cc5F)cc4)n3n2)CC1	CN1CCC(Nc2ccc3ncc(-c4ccc(Nc5ncc(Cl)cc5F)cc4)n3n2)CC1	7.82391	7.92082	-0.09691	CHEMBL3265824	CHEMBL3265824	TRUE
Cc1c(N2CCN(C)CC2)ccc2c3c(c(=O)oc12)CN(C(=O)c1ccc(NS(C)(=O)=O)c(F)c1)CC3	Cc1c(N2CCN(C)CC2)ccc2c3c(c(=O)oc12)CN(C(=O)c1ccc(NS(C)(=O)=O)c(Cl)c1)CC3	5.09691	5.19382	-0.09691	CHEMBL4338135	CHEMBL4338135	TRUE
CCC1(NC(=O)c2cccc(F)c2)CC2CN(CCc3c([nH]c4ccccc34)C(C(=O)OC)(c3cc4c(cc3OC)N(C)C3C(O)(C(=O)OC)C(OC(C)=O)C5(CC)C=CCN6CCC43C65)C2)C1	CCC1(NC(=O)c2cccc(Cl)c2)CC2CN(CCc3c([nH]c4ccccc34)C(C(=O)OC)(c3cc4c(cc3OC)N(C)C3C(O)(C(=O)OC)C(OC(C)=O)C5(CC)C=CCN6CCC43C65)C2)C1	7.60206	7.69897	-0.09691	CHEMBL4019566	CHEMBL4019566	TRUE
CC(Nc1ncc(F)c(Nc2cc(C3CC3)[nH]n2)n1)c1ccc(F)cn1	CC(Nc1ncc(Cl)c(Nc2cc(C3CC3)[nH]n2)n1)c1ccc(F)cn1	8	8.09691	-0.09691	CHEMBL4349442	CHEMBL4349442	TRUE
N#Cc1cc(-c2ncc3c(=O)[nH][nH]c3n2)ccc1OCc1ccc(F)cc1	N#Cc1cc(-c2ncc3c(=O)[nH][nH]c3n2)ccc1OCc1ccc(Cl)cc1	6.82102	6.91721	-0.0961916	CHEMBL5157201	CHEMBL5157201	TRUE
OC(c1ccccc1)(c1ccccc1)C1CCN(CCc2ccc(F)cc2)CC1	OC(c1ccccc1)(c1ccccc1)C1CCN(CCc2ccc(Cl)cc2)CC1	3.47756	3.57349	-0.095933	CHEMBL3389999	CHEMBL3389999	TRUE
COc1cc(C=Cc2nnc(NC(=O)c3cccc(F)c3)s2)c(Br)c(OC)c1OC	COc1cc(C=Cc2nnc(NC(=O)c3cccc(Cl)c3)s2)c(Br)c(OC)c1OC	5.14997	5.24565	-0.0956849	CHEMBL3367650	CHEMBL3367650	TRUE
O=C1NC(=S)S/C1=C\c1cnn(-c2ccc(F)cc2)c1	O=C1NC(=S)S/C1=C\c1cnn(-c2ccc(Cl)cc2)c1	7.0655	7.16115	-0.0956494	CHEMBL5216221	CHEMBL5216221	TRUE
N#Cc1ccc(-c2ccc(-c3nccn3-c3ccc(N4CCNCC4)cc3F)o2)cc1	N#Cc1ccc(-c2ccc(-c3nccn3-c3ccc(N4CCNCC4)cc3Cl)o2)cc1	7.79048	7.88606	-0.0955717	CHEMBL3369592	CHEMBL3369592	TRUE
CNc1nc(C)c(-c2nc(Nc3cccc(N4CCNCC4)c3)ncc2F)s1	CNc1nc(C)c(-c2nc(Nc3cccc(N4CCNCC4)c3)ncc2Cl)s1	6.71444	6.80967	-0.0952256	CHEMBL2350828	CHEMBL2350828	TRUE
O=C1NC(=Nc2ccc3oc(=O)ccc3c2)SC1=Cc1ccc(F)cc1	O=C1NC(=Nc2ccc3oc(=O)ccc3c2)SC1=Cc1ccc(Cl)cc1	6.66555	6.7607	-0.0951543	CHEMBL4408814	CHEMBL4408814	TRUE
O=c1[nH]c(=S)[nH]c2cc(-c3ccc(F)cc3)nn12	O=c1[nH]c(=S)[nH]c2cc(-c3ccc(Cl)cc3)nn12	4.37986	4.47496	-0.0950912	CHEMBL2406882	CHEMBL2406882	TRUE
O=C(O)c1cccc(N2CCN(C(=O)COc3ccc(F)cc3)CC2)c1	O=C(O)c1cccc(N2CCN(C(=O)COc3ccc(Cl)cc3)CC2)c1	5.33724	5.4318	-0.0945561	CHEMBL4432710	CHEMBL4432710	TRUE
CC1CCN(CCCOc2ccc(=O)n(-c3ccc(F)c(F)c3)n2)CC1	CC1CCN(CCCOc2ccc(=O)n(-c3ccc(F)c(Cl)c3)n2)CC1	5.57187	5.66555	-0.093681	CHEMBL3806618	CHEMBL3806618	TRUE
O=c1[nH]c(=S)[nH]c2nc(-c3ccc(F)cc3)nn12	O=c1[nH]c(=S)[nH]c2nc(-c3ccc(Cl)cc3)nn12	4.49201	4.58536	-0.0933516	CHEMBL2423138	CHEMBL2423138	TRUE
CCN(CCNc1nc2ccccc2[nH]1)Cc1cccc(F)c1O	CCN(CCNc1nc2ccccc2[nH]1)Cc1cccc(Cl)c1O	3.79317	3.88606	-0.0928825	CHEMBL4369746	CHEMBL4369746	TRUE
O=C(Sc1nncs1)c1ccc(-c2ccccc2F)o1	O=C(Sc1nncs1)c1ccc(-c2ccccc2Cl)o1	5.7778	5.87063	-0.0928285	CHEMBL4815902	CHEMBL4815902	TRUE
CC(C)(C)NC(=O)CN(Cc1ccc(C(=O)NO)cc1F)C(=O)c1ccccc1F	CC(C)(C)NC(=O)CN(Cc1ccc(C(=O)NO)cc1F)C(=O)c1ccccc1Cl	7.58503	7.67778	-0.0927541	CHEMBL5100169	CHEMBL5100169	TRUE
Cc1cc(F)ccc1-n1c(C)nc2ccc(C(=O)c3c(C)nn(C)c3O)cc2c1=O	Cc1cc(Cl)ccc1-n1c(C)nc2ccc(C(=O)c3c(C)nn(C)c3O)cc2c1=O	6.65956	6.75203	-0.0924708	CHEMBL3388490	CHEMBL3388490	TRUE
O=c1c(-c2ccc(F)cc2)c2n(c(=O)n1CCCCN1CCCC(c3c[nH]c4ccccc34)C1)CCCC2	O=c1c(-c2ccc(Cl)cc2)c2n(c(=O)n1CCCCN1CCCC(c3c[nH]c4ccccc34)C1)CCCC2	5.7665	5.85886	-0.0923677	CHEMBL4367999	CHEMBL4367999	TRUE
O=C(Nc1cccc(CNC(=O)c2sc3ccccc3c2OCc2ccccc2)c1)c1cccc(F)c1	O=C(Nc1cccc(CNC(=O)c2sc3ccccc3c2OCc2ccccc2)c1)c1cccc(Cl)c1	5.3279	5.42022	-0.0923143	CHEMBL4772833	CHEMBL4772833	TRUE
C#CCN(C)Cc1ccc(Br)cc1F	C#CCN(C)Cc1ccc(Br)cc1Cl	4.37675	4.46852	-0.0917704	CHEMBL4387563	CHEMBL4387563	TRUE
CN(C)CCN(C)c1ccc(C#N)c(CN2CCN(c3ccc(Cl)cc3F)CC2)c1	CN(C)CCN(C)c1ccc(C#N)c(CN2CCN(c3ccc(Cl)cc3Cl)CC2)c1	6.68825	6.77989	-0.0916458	CHEMBL4615220	CHEMBL4615220	TRUE
CS(=O)(=O)c1ccc(N2CCN=C2c2cccc(F)c2)cc1	CS(=O)(=O)c1ccc(N2CCN=C2c2cccc(Cl)c2)cc1	5	5.09151	-0.091515	CHEMBL3365665	CHEMBL3365665	TRUE
CCc1cc(C(=O)O)c2c(C(CC)CC)nn(-c3ccc(F)cc3)c2n1	CCc1cc(C(=O)O)c2c(C(CC)CC)nn(-c3ccc(Cl)cc3)c2n1	5.81531	5.90658	-0.0912697	CHEMBL4387437	CHEMBL4387437	TRUE
CCN(CC)CCCNc1nc(C=Cc2ccc(F)c(F)c2)nc2ccc(F)cc12	CCN(CC)CCCNc1nc(C=Cc2ccc(F)c(F)c2)nc2ccc(Cl)cc12	5.15366	5.24489	-0.0912248	CHEMBL4315097	CHEMBL4315097	TRUE
NS(=O)(=O)c1ccc(-c2nnc(-c3ccc(F)cc3)o2)cc1	NS(=O)(=O)c1ccc(-c2nnc(-c3ccc(Cl)cc3)o2)cc1	4.07676	4.16749	-0.0907351	CHEMBL4308252	CHEMBL4308252	TRUE
N#Cc1cnc(Nc2cc(NCC3CNCCO3)c(-c3cccc(F)c3)cn2)cn1	N#Cc1cnc(Nc2cc(NCC3CNCCO3)c(-c3cccc(Cl)c3)cn2)cn1	8.19382	8.284	-0.0901766	CHEMBL4706921	CHEMBL4706921	TRUE
O=S1(=O)CCc2c(-c3ccc(F)cc3)nn(-c3ccccc3F)c2O1	O=S1(=O)CCc2c(-c3ccc(F)cc3)nn(-c3ccccc3Cl)c2O1	6.79588	6.88606	-0.0901766	CHEMBL4708126	CHEMBL4708126	TRUE
N#Cc1cn(Cc2cccc(F)c2)c2ccc(-c3noc(=O)[nH]3)cc12	N#Cc1cn(Cc2cccc(Cl)c2)c2ccc(-c3noc(=O)[nH]3)cc12	5.4437	5.53313	-0.0894349	CHEMBL4767772	CHEMBL4767772	TRUE
COC(=O)c1cc2c(NC(=O)C34CC5CC(CC(C5)C3)C4)cccc2n(Cc2ccc(F)cc2)c1=O	COC(=O)c1cc2c(NC(=O)C34CC5CC(CC(C5)C3)C4)cccc2n(Cc2ccc(Cl)cc2)c1=O	6.05159	6.14086	-0.0892747	CHEMBL4153209	CHEMBL4153209	TRUE
O=C(NNC(=S)Nc1ccccc1F)c1ccccc1O	O=C(NNC(=S)Nc1ccccc1Cl)c1ccccc1O	6.01323	6.10237	-0.0891446	CHEMBL4383292	CHEMBL4383292	TRUE
O=C1COc2cc3ncnc(Nc4ccc(F)cc4)c3cc2N1CCCN1CCOCC1	O=C1COc2cc3ncnc(Nc4ccc(Cl)cc4)c3cc2N1CCCN1CCOCC1	6.36241	6.45136	-0.0889547	CHEMBL3776094	CHEMBL3776094	TRUE
Cc1cc(N2CC3CCC(C2)C3Nc2nc3n(n2)CCCC3Oc2cc(F)cc(Cl)c2)ncn1	Cc1cc(N2CC3CCC(C2)C3Nc2nc3n(n2)CCCC3Oc2cc(Cl)cc(Cl)c2)ncn1	8.09151	8.18046	-0.0889411	CHEMBL4731347	CHEMBL4731347	TRUE
CCN(Cc1ccc(C)cc1)C(=O)c1nc(-c2ccccc2F)c2ccccc2n1	CCN(Cc1ccc(C)cc1)C(=O)c1nc(-c2ccccc2Cl)c2ccccc2n1	9.22185	9.31069	-0.0888424	CHEMBL3269398	CHEMBL3269398	TRUE
Cc1ccc(S(=O)(=O)N(CC(=O)N(Cc2ccc(C3CCCCC3)cc2)c2ccc(C(=O)O)c(O)c2)Cc2ccc(F)cc2)cc1	Cc1ccc(S(=O)(=O)N(CC(=O)N(Cc2ccc(C3CCCCC3)cc2)c2ccc(C(=O)O)c(O)c2)Cc2ccc(Cl)cc2)cc1	5.11919	5.20761	-0.0884219	CHEMBL2434703	CHEMBL2434703	TRUE
Cc1c(N2CCN(Cc3cccc(F)c3)CC2)c(=O)n(CC(N)c2ccccc2)c(=O)n1Cc1c(F)cccc1F	Cc1c(N2CCN(Cc3cccc(Cl)c3)CC2)c(=O)n(CC(N)c2ccccc2)c(=O)n1Cc1c(F)cccc1F	8.42022	8.50864	-0.0884219	CHEMBL4430591	CHEMBL4430591	TRUE
CCc1nc(Nc2ccc(F)cc2)c2c3c(sc2n1)CCCC3	CCc1nc(Nc2ccc(Cl)cc2)c2c3c(sc2n1)CCCC3	5.21824	5.30627	-0.0880284	CHEMBL3855802	CHEMBL3855802	TRUE
C=C1C(=O)C23C(=O)C4OCC5(C=CCC(C)(C)C45)C2CCC1C3OC(=O)C=Cc1ccncc1F	C=C1C(=O)C23C(=O)C4OCC5(C=CCC(C)(C)C45)C2CCC1C3OC(=O)C=Cc1ccncc1Cl	5.98297	6.07058	-0.0876144	CHEMBL4630308	CHEMBL4630308	TRUE
CCC(=O)N1CCC(N2C(=O)N(c3ccc(F)cc3)Cc3cnc(Nc4ccc(N5CCN(C)CC5)c(C)c4)nc32)C1	CCC(=O)N1CCC(N2C(=O)N(c3ccc(Cl)cc3)Cc3cnc(Nc4ccc(N5CCN(C)CC5)c(C)c4)nc32)C1	7.74232	7.82974	-0.0874169	CHEMBL4038016	CHEMBL4038016	TRUE
COCCN(Cc1ccc(F)cc1)Cc1nn(-c2ccccc2F)c2c1CCS(=O)(=O)O2	COCCN(Cc1ccc(Cl)cc1)Cc1nn(-c2ccccc2F)c2c1CCS(=O)(=O)O2	6.95861	7.04576	-0.0871502	CHEMBL4708126	CHEMBL4708126	TRUE
N=C1SC(=Cc2ccc(OCc3ccccc3)cc2)C(=O)N1c1ccc(F)cc1	N=C1SC(=Cc2ccc(OCc3ccccc3)cc2)C(=O)N1c1ccc(Cl)cc1	5.06803	5.15428	-0.0862481	CHEMBL3411493	CHEMBL3411493	TRUE
O=C1Nc2ccccc2C1=Cc1ccc(-c2cn(-c3ccc(F)cc3)nn2)cc1	O=C1Nc2ccccc2C1=Cc1ccc(-c2cn(-c3ccc(Cl)cc3)nn2)cc1	3.70215	3.78832	-0.0861669	CHEMBL4819966	CHEMBL4819966	TRUE
COc1ccc(C(=O)CN2C(=O)C(=Cc3ccc(F)cc3)SC2=S)cc1	COc1ccc(C(=O)CN2C(=O)C(=Cc3ccc(Cl)cc3)SC2=S)cc1	4.6968	4.78252	-0.0857121	CHEMBL4481956	CHEMBL4481956	TRUE
CC(C)Oc1ccc(OCC2c3ccc(OC(C)C)cc3CCN2C(=S)c2cccc(F)c2)cc1	CC(C)Oc1ccc(OCC2c3ccc(OC(C)C)cc3CCN2C(=S)c2cccc(Cl)c2)cc1	6.17393	6.25964	-0.0857121	CHEMBL4012828	CHEMBL4012828	TRUE
O=C1CCCC(O)=C1C(=O)c1cccc(OCc2ccc(F)cc2)c1	O=C1CCCC(O)=C1C(=O)c1cccc(OCc2ccc(Cl)cc2)c1	6.5784	6.66354	-0.0851442	CHEMBL4481032	CHEMBL4481032	TRUE
O=C1NCCC1CC(NC(=O)C(CC1CCCCC1)NS(=O)(=O)c1ccc(F)cc1)C(O)S(=O)(=O)[O-	O=C1NCCC1CC(NC(=O)C(CC1CCCCC1)NS(=O)(=O)c1ccc(Cl)cc1)C(O)S(=O)(=O)[O-	5.20761	5.29243	-0.0848215	CHEMBL4003203	CHEMBL4003203	TRUE
Cc1noc(C)c1-c1ccc2c(c1)OC(c1cccc(F)c1)C(=O)N2	Cc1noc(C)c1-c1ccc2c(c1)OC(c1cccc(Cl)c1)C(=O)N2	6.20761	6.29243	-0.0848215	CHEMBL4154870	CHEMBL4154870	TRUE
O=C(C=Cc1ccccc1)Nc1cccc(F)c1	O=C(C=Cc1ccccc1)Nc1cccc(Cl)c1	5.37727	5.46201	-0.0847405	CHEMBL2338838	CHEMBL2338838	TRUE
O=C(NCc1ccc(F)c(F)c1)c1cc2cccnc2n(O)c1=O	O=C(NCc1ccc(F)c(Cl)c1)c1cc2cccnc2n(O)c1=O	7.76955	7.85387	-0.0843209	CHEMBL3132334	CHEMBL3132334	TRUE
CC(=O)Nc1ncc(CN2CCC(=CC(=O)Nc3ccc(F)cc3)CC2)s1	CC(=O)Nc1ncc(CN2CCC(=CC(=O)Nc3ccc(Cl)cc3)CC2)s1	6.76955	6.85387	-0.0843209	CHEMBL5115654	CHEMBL5115654	TRUE
CC(=CCOc1ccccc1CN(C)C(=O)c1ccc(-c2ccco2)c(F)c1)CCC(=O)O	CC(=CCOc1ccccc1CN(C)C(=O)c1ccc(-c2ccco2)c(Cl)c1)CCC(=O)O	8.71444	8.7986	-0.0841602	CHEMBL3855716	CHEMBL3855716	TRUE
O=[N+]([O-])c1ccccc1S(=O)(=O)N1CCc2c(sc3ncnc(Nc4cccc(F)c4)c23)C1	O=[N+]([O-])c1ccccc1S(=O)(=O)N1CCc2c(sc3ncnc(Nc4cccc(Cl)c4)c23)C1	5.70115	5.78516	-0.0840092	CHEMBL4341772	CHEMBL4341772	TRUE
O=C(O)CCc1nc(-c2ccccc2F)c(-c2ccccc2)o1	O=C(O)CCc1nc(-c2ccccc2Cl)c(-c2ccccc2)o1	4.39794	4.48149	-0.0835461	CHEMBL4415258	CHEMBL4415258	TRUE
O=C1OC(c2ccccc2)OC(=O)C1=Cc1ccc(O)c(F)c1	O=C1OC(c2ccccc2)OC(=O)C1=Cc1ccc(O)c(Cl)c1	5.33255	5.41567	-0.0831217	CHEMBL4689706	CHEMBL4689706	TRUE
COCCOc1cc2ncnc(Nc3ccc(F)c([N+](=O)[O-])c3)c2c2c1OCCO2	COCCOc1cc2ncnc(Nc3ccc(Cl)c([N+](=O)[O-])c3)c2c2c1OCCO2	7.35853	7.44129	-0.0827655	CHEMBL3807186	CHEMBL3807186	TRUE
C=C(C(=O)OC)C(OC(C)=O)c1ccc(F)cc1	C=C(C(=O)OC)C(OC(C)=O)c1ccc(Cl)cc1	4.19246	4.27409	-0.0816234	CHEMBL4034109	CHEMBL4034109	TRUE
COc1cc2c(cc1OC)CN(C(=O)c1ccc(-c3cccc(F)c3)o1)CC2	COc1cc2c(cc1OC)CN(C(=O)c1ccc(-c3cccc(Cl)c3)o1)CC2	4.7508	4.83209	-0.0812905	CHEMBL4153366	CHEMBL4153366	TRUE
COc1nn2cc(-c3ccccc3F)nc2s1	COc1nn2cc(-c3ccccc3Cl)nc2s1	6.27901	6.35952	-0.0805043	CHEMBL3863813	CHEMBL3863813	TRUE
Fc1ccc(C2=NOC(Cc3ccccc3)C2)cc1	Clc1ccc(C2=NOC(Cc3ccccc3)C2)cc1	9.51004	9.59007	-0.0800254	CHEMBL2327197	CHEMBL2327197	TRUE
O=C(C=Cc1ccc(F)cc1)c1ccc2ccccc2c1O	O=C(C=Cc1ccc(Cl)cc1)c1ccc2ccccc2c1O	7.31596	7.39577	-0.079811	CHEMBL4334805	CHEMBL4334805	TRUE
O=C(C=Cc1ccccc1)c1ccc(OCc2cc(-c3ccc(Cl)c(F)c3)no2)cc1	O=C(C=Cc1ccccc1)c1ccc(OCc2cc(-c3ccc(Cl)c(Cl)c3)no2)cc1	5.52288	5.60206	-0.0791812	CHEMBL4430738	CHEMBL4430738	TRUE
CC(=O)N1CCc2ccc(N(C(=O)C=Cc3cccc(F)c3)C3CCN(Cc4ccccc4)CC3)cc21	CC(=O)N1CCc2ccc(N(C(=O)C=Cc3cccc(Cl)c3)C3CCN(Cc4ccccc4)CC3)cc21	5.4437	5.52288	-0.0791812	CHEMBL3107076	CHEMBL3107076	TRUE
O=C(Nc1cc(F)ccc1C(=O)O)c1ccc(-c2ccccc2)c(Oc2ccccc2)c1	O=C(Nc1cc(Cl)ccc1C(=O)O)c1ccc(-c2ccccc2)c(Oc2ccccc2)c1	5.22185	5.30103	-0.0791812	CHEMBL3129686	CHEMBL3129686	TRUE
O=C1c2cccc3cc(S(=O)(=O)[O-])cc(c23)C(=O)N1Cc1ccc(F)cc1	O=C1c2cccc3cc(S(=O)(=O)[O-])cc(c23)C(=O)N1Cc1ccc(Cl)cc1	4.92082	5	-0.0791812	CHEMBL3110376	CHEMBL3110376	TRUE
CCN(C(=O)CO)C1CN(C(=NC#N)Nc2ccc(F)c(Cl)c2)N=C1c1ccc(Cl)cc1	CCN(C(=O)CO)C1CN(C(=NC#N)Nc2ccc(Cl)c(Cl)c2)N=C1c1ccc(Cl)cc1	7.22185	7.30103	-0.0791812	CHEMBL3821546	CHEMBL3821546	TRUE
NS(=O)(=O)c1ccc2c(c1)C(=O)C(=O)N2Cc1c(F)cccc1F	NS(=O)(=O)c1ccc2c(c1)C(=O)C(=O)N2Cc1c(F)cccc1Cl	8.26761	8.34679	-0.0791812	CHEMBL5047315	CHEMBL5047315	TRUE
NCCc1ccc(-c2ccccc2F)cc1	NCCc1ccc(-c2ccccc2Cl)cc1	5	5.07883	-0.0788339	CHEMBL4182524	CHEMBL4182524	TRUE
O=C(Nc1nnc(-c2ccc(Oc3ccc([N+](=O)[O-])cc3)cc2)s1)c1ccccc1F	O=C(Nc1nnc(-c2ccc(Oc3ccc([N+](=O)[O-])cc3)cc2)s1)c1ccccc1Cl	8.12668	8.20482	-0.078136	CHEMBL3375102	CHEMBL3375102	TRUE
Fc1ccc(Nc2nccc(Nc3ccc4[nH]ncc4c3)n2)cc1	Clc1ccc(Nc2nccc(Nc3ccc4[nH]ncc4c3)n2)cc1	6.6968	6.77469	-0.0778868	CHEMBL3820579	CHEMBL3820579	TRUE
COc1cc2c(cc1OC)CN(CCn1cc(COc3ccccc3C(=O)Nc3ccc(F)cc3)nn1)CC2	COc1cc2c(cc1OC)CN(CCn1cc(COc3ccccc3C(=O)Nc3ccc(Cl)cc3)nn1)CC2	5.08145	5.15927	-0.0778213	CHEMBL4056329	CHEMBL4056329	TRUE
O=C(C1CCCN1C(=S)Nc1ccc(F)cc1)N1CCC(c2noc3cc(F)ccc23)CC1	O=C(C1CCCN1C(=S)Nc1ccc(Cl)cc1)N1CCC(c2noc3cc(F)ccc23)CC1	4.14935	4.22621	-0.0768598	CHEMBL2319454	CHEMBL2319454	TRUE
CC1(C)CCN(Cc2ccc(C(=O)NO)cc2)c2ccc(F)cc21	CC1(C)CCN(Cc2ccc(C(=O)NO)cc2)c2ccc(Cl)cc21	7.34582	7.42251	-0.0766847	CHEMBL4823880	CHEMBL4823880	TRUE
O=C(c1ccc(Cl)cc1)C1CCN(C(=O)c2cccc(F)c2)CC1	O=C(c1ccc(Cl)cc1)C1CCN(C(=O)c2cccc(Cl)c2)CC1	4.69037	4.767	-0.0766341	CHEMBL4681616	CHEMBL4681616	TRUE
Cc1cn(C23CC(Nc4nc5n(n4)CCCCC5c4ccc(F)cc4)(C2)C3)cn1	Cc1cn(C23CC(Nc4nc5n(n4)CCCCC5c4ccc(Cl)cc4)(C2)C3)cn1	7.50864	7.58503	-0.0763883	CHEMBL4307629	CHEMBL4307629	TRUE
Fc1cc(C(CC2CNC2)Oc2ccccc2F)ccc1Cl	Fc1ccccc1OC(CC1CNC1)c1ccc(Cl)c(Cl)c1	7.1945	7.27084	-0.0763361	CHEMBL3363900	CHEMBL3363900	TRUE
O=P(O)(O)C(F)(F)c1ccc(-c2cccc(Cc3cc(Cl)c(Cl)cc3F)c2)cc1	O=P(O)(O)C(F)(F)c1ccc(-c2cccc(Cc3cc(Cl)c(Cl)cc3Cl)c2)cc1	5.25181	5.3279	-0.0760902	CHEMBL4032254	CHEMBL4032254	TRUE
Fc1ccc(CCC2CN(Cc3c[nH]c4cc(F)ccc34)CCC2(F)F)cc1	Fc1ccc(CCC2CN(Cc3c[nH]c4cc(Cl)ccc34)CCC2(F)F)cc1	7.60206	7.67778	-0.0757207	CHEMBL3870251	CHEMBL3870251	TRUE
COc1ccc(F)cc1S(=O)(=O)Nc1cncc(C(N)=O)c1	COc1ccc(Cl)cc1S(=O)(=O)Nc1cncc(C(N)=O)c1	7.72125	7.79588	-0.0746336	CHEMBL4186501	CHEMBL4186501	TRUE
Cn1c(C(=O)Nc2cccc(F)c2)cc2sccc21	Cn1c(C(=O)Nc2cccc(Cl)c2)cc2sccc21	4.65365	4.72816	-0.0745114	CHEMBL4008766	CHEMBL4008766	TRUE
Fc1ccccc1-c1ccc2c(ccn2Cc2coc(/C=C/c3ccc(C(F)(F)F)cc3)n2)c1	FC(F)(F)c1ccc(/C=C/c2nc(Cn3ccc4cc(-c5ccccc5Cl)ccc43)co2)cc1	4.91578	4.99012	-0.0743431	CHEMBL5122916	CHEMBL5122916	TRUE
Nc1ncnc2c1ncn2C1OC(COC(=O)c2ccc(F)cc2)C(O)C1O	Nc1ncnc2c1ncn2C1OC(COC(=O)c2ccc(Cl)cc2)C(O)C1O	4.29243	4.36653	-0.0741017	CHEMBL3624754	CHEMBL3624754	TRUE
Nc1ncnc2c1ncn2C1OC(COC(=O)c2ccc(F)cc2)C(O)C1O	Nc1ncnc2c1ncn2C1OC(COC(=O)c2ccc(Cl)cc2)C(O)C1O	4.29243	4.36653	-0.0741017	CHEMBL3624754	CHEMBL3624754	TRUE
NS(=O)(=O)c1ccc(NC(=O)Cc2ccc(F)cc2)c(F)c1	NS(=O)(=O)c1ccc(NC(=O)Cc2ccc(F)cc2)c(Cl)c1	8.08092	8.1549	-0.0739801	CHEMBL2406029	CHEMBL2406029	TRUE
CCC(=C(c1ccc(C=CC(=O)O)cc1)c1cc2cn[nH]c2cc1F)c1ccccc1	CCC(=C(c1ccc(C=CC(=O)O)cc1)c1cc2cn[nH]c2cc1Cl)c1ccccc1	7.19382	7.26761	-0.0737862	CHEMBL3636941	CHEMBL3636941	TRUE
O=C(N1CCN(c2cccc(F)c2)CC1)n1c2ccccc2c(=O)c2ccccc21	O=C(N1CCN(c2cccc(Cl)c2)CC1)n1c2ccccc2c(=O)c2ccccc21	6.14874	6.22185	-0.0731071	CHEMBL4687994	CHEMBL4687994	TRUE
CC1(C)CC(=O)c2ccc(OCc3cccc(F)c3)cc2O1	CC1(C)CC(=O)c2ccc(OCc3cccc(Cl)c3)cc2O1	7.18389	7.25673	-0.0728341	CHEMBL3745316	CHEMBL3745316	TRUE
Nc1c(C(=O)O)cnn1-c1ccc(CN(Cc2ccc(F)cc2)Cc2ccc(F)c(F)c2)cc1	Nc1c(C(=O)O)cnn1-c1ccc(CN(Cc2ccc(Cl)cc2)Cc2ccc(F)c(F)c2)cc1	4.88606	4.95861	-0.0725507	CHEMBL3871243	CHEMBL3871243	TRUE
N#Cc1cccc(S(=O)(=O)N(Cc2ccc(F)cc2)CC2CCC(=O)N2)c1	N#Cc1cccc(S(=O)(=O)N(Cc2ccc(Cl)cc2)CC2CCC(=O)N2)c1	5.58503	5.65758	-0.0725507	CHEMBL3129655	CHEMBL3129655	TRUE
O=C(CBr)OCCn1c(=O)oc2cc3ncnc(Nc4ccc(F)c(F)c4)c3cc21	O=C(CBr)OCCn1c(=O)oc2cc3ncnc(Nc4ccc(F)c(Cl)c4)c3cc21	5.88606	5.95861	-0.0725507	CHEMBL3854310	CHEMBL3854310	TRUE
Cn1c(-c2ccccn2)c(C2CCCC2)c2ccc(C(=O)NC3(C(=O)Nc4ccc(C=CC(=O)O)c(F)c4)CCC3)cc21	Cn1c(-c2ccccn2)c(C2CCCC2)c2ccc(C(=O)NC3(C(=O)Nc4ccc(C=CC(=O)O)c(Cl)c4)CCC3)cc21	6.88606	6.95861	-0.0725507	CHEMBL3376561	CHEMBL3376561	TRUE
O=C(c1ccc(Cl)cc1)C1CCN(C(=O)c2cc(O)cc(F)c2)CC1	O=C(c1ccc(Cl)cc1)C1CCN(C(=O)c2cc(O)cc(Cl)c2)CC1	5.88606	5.95861	-0.0725507	CHEMBL4424599	CHEMBL4424599	TRUE
CCNc1[nH]c(=O)n(O)c(=O)c1C(=O)NCc1ccc(F)c(F)c1	CCNc1[nH]c(=O)n(O)c(=O)c1C(=O)NCc1ccc(Cl)c(F)c1	7.58503	7.65758	-0.0725507	CHEMBL4478453	CHEMBL4478453	TRUE
Fc1ccc(SSc2nccs2)cc1	Clc1ccc(SSc2nccs2)cc1	5.65541	5.72793	-0.072515	CHEMBL4119584	CHEMBL4119584	TRUE
CCOC(=O)c1sc(Nc2ccc(C)c(F)c2)nc1C(C)(C)C	CCOC(=O)c1sc(Nc2ccc(C)c(Cl)c2)nc1C(C)(C)C	6.18575	6.25806	-0.0723085	CHEMBL3413103	CHEMBL3413103	TRUE
COc1ccccc1C1CCN(c2nc(C3CC3)nc3ccc(N(C)CCO)c(F)c23)CC1	COc1ccccc1C1CCN(c2nc(C3CC3)nc3ccc(N(C)CCO)c(Cl)c23)CC1	6.22915	6.30103	-0.071882	CHEMBL4375457	CHEMBL4375457	TRUE
O=S(=O)(C=Cc1ccccn1)c1cccc(F)c1	O=S(=O)(C=Cc1ccccn1)c1cccc(Cl)c1	5.77392	5.84558	-0.0716601	CHEMBL4712767	CHEMBL4712767	TRUE
O=C(Nc1cncc(-c2cc(-c3cccnc3)cs2)c1)c1ccccc1F	O=C(Nc1cncc(-c2cc(-c3cccnc3)cs2)c1)c1ccccc1Cl	6.97184	7.04335	-0.0715158	CHEMBL4263631	CHEMBL4263631	TRUE
Cc1c(Cc2cccc(F)c2)c(-c2cc(Cl)nc(N)n2)nn1C	Cc1c(Cc2cccc(Cl)c2)c(-c2cc(Cl)nc(N)n2)nn1C	6.89963	6.97062	-0.0709868	CHEMBL4839263	CHEMBL4839263	TRUE
O=S(=O)(NC1CCN(c2ncnc3c2nc(-c2ccccc2Cl)n3-c2ccc(F)cc2)CC1)c1ccccc1F	O=S(=O)(NC1CCN(c2ncnc3c2nc(-c2ccccc2Cl)n3-c2ccc(Cl)cc2)CC1)c1ccccc1F	5	5.07058	-0.0705811	CHEMBL4387104	CHEMBL4387104	TRUE
Cc1ccc(C(C)C)c(OC(=O)Nc2ccc(F)cc2)c1	Cc1ccc(C(C)C)c(OC(=O)Nc2ccc(Cl)cc2)c1	3.56896	3.63929	-0.070335	CHEMBL3879334	CHEMBL3879334	TRUE
CCC(C)Oc1cc(NC(=O)/C(C#N)=C(/C)O)c(F)cc1-c1cccc(F)c1C	CCC(C)Oc1cc(NC(=O)/C(C#N)=C(/C)O)c(F)cc1-c1cccc(Cl)c1C	7.58336	7.65365	-0.0702875	CHEMBL5140113	CHEMBL5140113	TRUE
COC(=O)C(C#N)=C1SCC(=O)N1c1cccc(F)c1	COC(=O)C(C#N)=C1SCC(=O)N1c1cccc(Cl)c1	5	5.07007	-0.0700704	CHEMBL4262431	CHEMBL4262431	TRUE
CN1CCN(c2ccc(Nc3nc(Oc4cccc5c4C(=O)CC5)c4cc[nH]c4n3)cc2F)CC1	CN1CCN(c2ccc(Nc3nc(Oc4cccc5c4C(=O)CC5)c4cc[nH]c4n3)cc2Cl)CC1	8.24872	8.31876	-0.0700379	CHEMBL5155831	CHEMBL5155831	TRUE
CN1CCN(c2ccc(-c3ccc4[nH]c5nccc(C#Cc6ccccc6F)c5c4c3)cc2)CC1	CN1CCN(c2ccc(-c3ccc4[nH]c5nccc(C#Cc6ccccc6Cl)c5c4c3)cc2)CC1	5.95861	6.02687	-0.0682648	CHEMBL5140258	CHEMBL5140258	TRUE
Fc1cc(C=Cc2ccc(N3CCN(C4=NCCO4)CC3)cc2)cc(Cn2ccnc2)c1	Clc1cc(C=Cc2ccc(N3CCN(C4=NCCO4)CC3)cc2)cc(Cn2ccnc2)c1	6.93181	7	-0.0681859	CHEMBL4124009	CHEMBL4124009	TRUE
Oc1ccc(F)cc1-c1cncn1Cc1cc2cc(Br)ccc2[nH]1	Oc1ccc(Cl)cc1-c1cncn1Cc1cc2cc(Br)ccc2[nH]1	5.98297	6.05061	-0.0676433	CHEMBL4145007	CHEMBL4145007	TRUE
CC(=O)OCC1Cc2c(-c3ccccn3)ccc(F)c2-c2c(O)ccc(C)c21	CC(=O)OCC1Cc2c(-c3ccccn3)ccc(Cl)c2-c2c(O)ccc(C)c21	4	4.06763	-0.0676277	CHEMBL5156187	CHEMBL5156187	TRUE
O=C(NC(=S)Nc1ccc(F)cc1)c1ccccc1	O=C(NC(=S)Nc1ccc(Cl)cc1)c1ccccc1	4.3851	4.45247	-0.0673686	CHEMBL3090408	CHEMBL3090408	TRUE
O=S(=O)(NCc1csc2ccccc12)c1ccc(F)cc1	O=S(=O)(NCc1csc2ccccc12)c1ccc(Cl)cc1	5.20621	5.27327	-0.0670632	CHEMBL4480546	CHEMBL4480546	TRUE
COC1C(C(=O)N(C)c2ccc3ncsc3c2)OC(CO)C(O)C1n1cc(-c2ccc(Cl)c(F)c2F)nn1	COC1C(C(=O)N(C)c2ccc3ncsc3c2)OC(CO)C(O)C1n1cc(-c2ccc(Cl)c(F)c2Cl)nn1	7.67778	7.74473	-0.0669468	CHEMBL4679827	CHEMBL4679827	TRUE
CC(CCCNCc1ccc(F)cc1)C1CCC2(C)C3CC=C4C(CCC(O)C4(C)C)C3(C)C(O)CC12C	CC(CCCNCc1ccc(Cl)cc1)C1CCC2(C)C3CC=C4C(CCC(O)C4(C)C)C3(C)C(O)CC12C	6.1549	6.22185	-0.0669468	CHEMBL4603179	CHEMBL4603179	TRUE
O=S(=O)(Nc1ccc(-c2nc3cc(NS(=O)(=O)c4ccc(Cl)s4)ccc3o2)cc1)c1ccc(F)c(C(F)(F)F)c1	O=S(=O)(Nc1ccc(-c2nc3cc(NS(=O)(=O)c4ccc(Cl)s4)ccc3o2)cc1)c1ccc(Cl)c(C(F)(F)F)c1	4.85387	4.92082	-0.0669468	CHEMBL4388637	CHEMBL4388637	TRUE
O=C(O)c1ccccc1C(=O)c1ccc(F)cc1	O=C(O)c1ccccc1C(=O)c1ccc(Cl)cc1	4.85387	4.92082	-0.0669468	CHEMBL3631655	CHEMBL3631655	TRUE
O=c1[nH]cnc2c(-n3cc(CCN4CCC(Cc5ccc(F)cc5)CC4)cn3)nccc12	O=c1[nH]cnc2c(-n3cc(CCN4CCC(Cc5ccc(Cl)cc5)CC4)cn3)nccc12	6.83268	6.89963	-0.0669468	CHEMBL3778805	CHEMBL3778805	TRUE
Nc1ccc(Oc2ccc(NC(=O)Nc3cccc(F)c3)cc2)cn1	Nc1ccc(Oc2ccc(NC(=O)Nc3cccc(Cl)c3)cc2)cn1	7.32514	7.39147	-0.0663351	CHEMBL5106814	CHEMBL5106814	TRUE
Cc1noc(C)c1-c1ccc2c(c1)OC(c1ccccc1F)C(=O)N2	Cc1noc(C)c1-c1ccc2c(c1)OC(c1ccccc1Cl)C(=O)N2	6.24413	6.3098	-0.0656788	CHEMBL4154870	CHEMBL4154870	TRUE
O=C1Nc2ccc(F)cc2C1=Cc1ccc(-c2cn(-c3ccccc3F)nn2)cc1	O=C1Nc2ccc(F)cc2C1=Cc1ccc(-c2cn(-c3ccccc3Cl)nn2)cc1	3.85543	3.92107	-0.0656464	CHEMBL4819966	CHEMBL4819966	TRUE
Cc1c(C(C#N)c2cccc(F)c2)nc(SC(C)C)[nH]c1=O	Cc1c(C(C#N)c2cccc(Cl)c2)nc(SC(C)C)[nH]c1=O	6.08145	6.14691	-0.065465	CHEMBL5140369	CHEMBL5140369	TRUE
O=S(=O)(c1ccc(F)cc1F)N1CCc2c(sc3ncnc(Nc4cccc(F)c4)c23)C1	O=S(=O)(c1ccc(F)cc1F)N1CCc2c(sc3ncnc(Nc4cccc(Cl)c4)c23)C1	5.69465	5.75945	-0.0648021	CHEMBL4341772	CHEMBL4341772	TRUE
Fc1ccc(C2=CSC3=NC4=C(CNCC4=Cc4ccccc4Cl)C(c4ccccc4Cl)N23)cc1	Clc1ccc(C2=CSC3=NC4=C(CNCC4=Cc4ccccc4Cl)C(c4ccccc4Cl)N23)cc1	5.21968	5.284	-0.064314	CHEMBL3105940	CHEMBL3105940	TRUE
COc1cc2c(cc1OC)C(=O)C(CC1CCN(Cc3ccccc3F)CC1)C2	COc1cc2c(cc1OC)C(=O)C(CC1CCN(Cc3ccccc3Cl)CC1)C2	5.43063	5.49485	-0.0642239	CHEMBL3870526	CHEMBL3870526	TRUE
O=C(NN=Cc1ccc(F)c([N+](=O)[O-])c1)c1ccc2c(c1)OCCCO2	O=C(NN=Cc1ccc(Cl)c([N+](=O)[O-])c1)c1ccc2c(c1)OCCCO2	5.29243	5.35655	-0.0641175	CHEMBL3994743	CHEMBL3994743	TRUE
O=C(O)C1CCC(C(=O)N2CCC(c3ccc(C(OCc4c(F)cccc4F)(C(F)(F)F)C(F)(F)F)cc3)(S(=O)(=O)c3ccc(F)cc3)C2)CC1	O=C(O)C1CCC(C(=O)N2CCC(c3ccc(C(OCc4c(F)cccc4Cl)(C(F)(F)F)C(F)(F)F)cc3)(S(=O)(=O)c3ccc(F)cc3)C2)CC1	7.4318	7.49485	-0.0630517	CHEMBL4701267	CHEMBL4701267	TRUE
O=C(c1c(O)cc(F)cc1Cl)N1CCC2(CCC2)C1	O=C(c1c(O)cc(Cl)cc1Cl)N1CCC2(CCC2)C1	6.17393	6.23657	-0.0626468	CHEMBL4360952	CHEMBL4360952	TRUE
CCOC(=O)c1c(C)nc(-c2cccc(C#N)c2)n1OCc1cccc(F)c1	CCOC(=O)c1c(C)nc(-c2cccc(C#N)c2)n1OCc1cccc(Cl)c1	4.65057	4.71316	-0.0625949	CHEMBL4678938	CHEMBL4678938	TRUE
O=C1CC(c2ccc(F)cc2)Sc2ccccc2N1Cc1ccccc1[N+](=O)[O-	O=C1CC(c2ccc(Cl)cc2)Sc2ccccc2N1Cc1ccccc1[N+](=O)[O-	4.08619	4.14874	-0.0625555	CHEMBL4276177	CHEMBL4276177	TRUE
Nc1cc(OCc2ccccc2F)c2nn[nH]c2n1	Nc1cc(OCc2ccccc2Cl)c2nn[nH]c2n1	7.52288	7.58503	-0.0621479	CHEMBL4329744	CHEMBL4329744	TRUE
NCCCNc1nc2ccc(F)cc2c2[nH]c3ccccc3c12	NCCCNc1nc2ccc(Cl)cc2c2[nH]c3ccccc3c12	4.84466	4.90658	-0.0619144	CHEMBL3268866	CHEMBL3268866	TRUE
O=c1[nH]c2ccc(-c3csc(-c4ccc(F)cc4)n3)cc2o1	O=c1[nH]c2ccc(-c3csc(-c4ccc(Cl)cc4)n3)cc2o1	4.63827	4.69897	-0.0606978	CHEMBL3362813	CHEMBL3362813	TRUE
O=c1[nH]nc(CCc2ccc(F)cc2)cc1O	O=c1[nH]nc(CCc2ccc(Cl)cc2)cc1O	8.50864	8.56864	-0.0599979	CHEMBL2343135	CHEMBL2343135	TRUE
N#Cc1c(N)c(C#N)c(-c2ccc(F)cc2)c2c1CC(c1ccc(Cl)cc1)S2	N#Cc1c(N)c(C#N)c(-c2ccc(Cl)cc2)c2c1CC(c1ccc(Cl)cc1)S2	4.40716	4.46712	-0.059961	CHEMBL2351003	CHEMBL2351003	TRUE
Cn1c(N2CCNC(c3ccccc3F)C2)nc(-c2ccncc2)cc1=O	Cn1c(N2CCNC(c3ccccc3Cl)C2)nc(-c2ccncc2)cc1=O	7.95861	8.01773	-0.0591215	CHEMBL4057861	CHEMBL4057861	TRUE
O=C1c2ccccc2C(=O)c2c1cc(NS(=O)(=O)c1ccc(F)c(C(F)(F)F)c1)c(O)c2O	O=C1c2ccccc2C(=O)c2c1cc(NS(=O)(=O)c1ccc(Cl)c(C(F)(F)F)c1)c(O)c2O	6.20066	6.25964	-0.0589779	CHEMBL4666358	CHEMBL4666358	TRUE
Cc1nnc(SC(=O)c2ccc(-c3ccc(F)cc3)o2)s1	Cc1nnc(SC(=O)c2ccc(-c3ccc(Cl)cc3)o2)s1	6.09909	6.15802	-0.0589283	CHEMBL4815905	CHEMBL4815905	TRUE
C#CCSc1nc(NNC(N)=S)c(C#N)c(-c2ccc(F)cc2)n1	C#CCSc1nc(NNC(N)=S)c(C#N)c(-c2ccc(Cl)cc2)n1	5.73993	5.7986	-0.0586743	CHEMBL3420662	CHEMBL3420662	TRUE
NC(=O)c1c(NC(=O)c2ccccc2F)sc2c1CCN(Cc1c(Cl)cccc1Cl)C2	NC(=O)c1c(NC(=O)c2ccccc2Cl)sc2c1CCN(Cc1c(Cl)cccc1Cl)C2	4.48188	4.54016	-0.0582743	CHEMBL4344502	CHEMBL4344502	TRUE
O=C(CCCCCCNc1nn2c(=O)c3cc(F)ccc3nc2c2ccccc12)NO	O=C(CCCCCCNc1nn2c(=O)c3cc(Cl)ccc3nc2c2ccccc12)NO	7.51856	7.57675	-0.0581968	CHEMBL5043973	CHEMBL5043973	TRUE
C#CCSc1nc(NNC(N)=S)c(C#N)c(-c2ccc(F)cc2)n1	C#CCSc1nc(NNC(N)=S)c(C#N)c(-c2ccc(Cl)cc2)n1	5.73993	5.798	-0.058071	CHEMBL4036634	CHEMBL4036634	TRUE
O=C1CC(c2ccc(F)cc2)Sc2ccccc2N1Cc1ccccc1[N+](=O)[O-	O=C1CC(c2ccc(Cl)cc2)Sc2ccccc2N1Cc1ccccc1[N+](=O)[O-	4.08884	4.14691	-0.0580681	CHEMBL2338935	CHEMBL2338935	TRUE
O=c1cc(COc2ccc(F)cc2)occ1O	O=c1cc(COc2ccc(Cl)cc2)occ1O	6.09691	6.1549	-0.0579919	CHEMBL2399754	CHEMBL2399754	TRUE
O=C(O)C1CCC(CNc2nc(-c3ccccc3)cc(-c3cccc(F)c3)n2)CC1	O=C(O)C1CCC(CNc2nc(-c3ccccc3)cc(-c3cccc(Cl)c3)n2)CC1	6.25806	6.31605	-0.0579919	CHEMBL3375358	CHEMBL3375358	TRUE
O=C(O)CC1CCCN(c2ccc(C(=O)NC3CCCCC3)c(OCc3ccc(F)cc3)n2)C1	O=C(O)CC1CCCN(c2ccc(C(=O)NC3CCCCC3)c(OCc3ccc(Cl)cc3)n2)C1	5.05552	5.11351	-0.0579919	CHEMBL4681694	CHEMBL4681694	TRUE
O=C(Nc1cccnc1)c1ccccc1OCc1cccc(F)c1	O=C(Nc1cccnc1)c1ccccc1OCc1cccc(Cl)c1	5.79588	5.85387	-0.0579919	CHEMBL4412720	CHEMBL4412720	TRUE
CN(Cc1ccccc1)Cc1nn(-c2ccccc2F)c2c1CCS(=O)(=O)O2	CN(Cc1ccccc1)Cc1nn(-c2ccccc2Cl)c2c1CCS(=O)(=O)O2	7.09691	7.1549	-0.0579919	CHEMBL4708126	CHEMBL4708126	TRUE
COc1cnc2ccc(=O)n(CCN3CCN(C(=S)Nc4ccc(F)cc4)CC3)c2c1	COc1cnc2ccc(=O)n(CCN3CCN(C(=S)Nc4ccc(Cl)cc4)CC3)c2c1	4.83387	4.89143	-0.0575689	CHEMBL3745429	CHEMBL3745429	TRUE
O=C(CC1c2ccccc2-c2cncn21)NCc1ccc(F)c(F)c1	O=C(CC1c2ccccc2-c2cncn21)NCc1ccc(F)c(Cl)c1	4.23575	4.29328	-0.0575331	CHEMBL4194378	CHEMBL4194378	TRUE
CC(C)=CCC(OC(=O)C=CC(=O)c1ccc(C)cc1F)C1=CC(=O)c2c(O)ccc(O)c2C1=O	CC(C)=CCC(OC(=O)C=CC(=O)c1ccc(C)cc1Cl)C1=CC(=O)c2c(O)ccc(O)c2C1=O	6.9201	6.97757	-0.0574761	CHEMBL4410222	CHEMBL4410222	TRUE
O=C(Nc1ccc(Cl)c(F)c1)c1ccc2[nH]ncc2c1	O=C(Nc1ccc(Cl)c(Cl)c1)c1ccc2[nH]ncc2c1	9.17522	9.2321	-0.0568788	CHEMBL3364094	CHEMBL3364094	TRUE
COc1ccc2nc(C)cc(N3CCC(NC(=O)Nc4ccc(F)cc4)CC3)c2c1	COc1ccc2nc(C)cc(N3CCC(NC(=O)Nc4ccc(Cl)cc4)CC3)c2c1	4.7333	4.78941	-0.0561159	CHEMBL3405734	CHEMBL3405734	TRUE
COc1ccc2nc(C)cc(N3CCC(NC(=O)Nc4ccc(F)cc4)CC3)c2c1	COc1ccc2nc(C)cc(N3CCC(NC(=O)Nc4ccc(Cl)cc4)CC3)c2c1	4.7333	4.78941	-0.0561159	CHEMBL3405734	CHEMBL3405734	TRUE
O=C(NC1CC1)c1c(NO)cc(-c2ccc(F)cc2)oc1=O	O=C(NC1CC1)c1c(NO)cc(-c2ccc(Cl)cc2)oc1=O	5.48149	5.5376	-0.0561159	CHEMBL3636663	CHEMBL3636663	TRUE
Cc1c(OCc2ccc(F)cc2)cccc1C(=O)C1=C(O)CCCC1=O	Cc1c(OCc2ccc(Cl)cc2)cccc1C(=O)C1=C(O)CCCC1=O	6.51999	6.57512	-0.0551253	CHEMBL4481032	CHEMBL4481032	TRUE
CCC(C)Oc1cc(NC(=O)/C(C#N)=C(/C)O)c(F)cc1-c1ccc(F)cc1	CCC(C)Oc1cc(NC(=O)/C(C#N)=C(/C)O)c(F)cc1-c1ccc(Cl)cc1	7.42251	7.47756	-0.0550476	CHEMBL5140113	CHEMBL5140113	TRUE
O=C(c1nnc2ccc(F)cn12)N1CCC(c2ccccc2C(F)(F)F)CC1	O=C(c1nnc2ccc(Cl)cn12)N1CCC(c2ccccc2C(F)(F)F)CC1	8.34199	8.39686	-0.054867	CHEMBL4305280	CHEMBL4305280	TRUE
Cc1c(-c2ccc(F)cc2)sc2nc(Cc3ccccc3)[nH]c(=O)c12	Cc1c(-c2ccc(Cl)cc2)sc2nc(Cc3ccccc3)[nH]c(=O)c12	4.76955	4.82391	-0.0543577	CHEMBL5157691	CHEMBL5157691	TRUE
COc1ccc(Cn2cc(C(=O)NN=C3C(=O)Nc4c(F)cccc43)nn2)cc1	COc1ccc(Cn2cc(C(=O)NN=C3C(=O)Nc4c(Cl)cccc43)nn2)cc1	4.85078	4.90483	-0.0540498	CHEMBL4412615	CHEMBL4412615	TRUE
O=C(Nc1ccc(O)c(Cl)c1)Nc1nc2ccc(F)cc2s1	O=C(Nc1ccc(O)c(Cl)c1)Nc1nc2ccc(Cl)cc2s1	5.72354	5.77728	-0.0537453	CHEMBL4396977	CHEMBL4396977	TRUE
O=C1Nc2ccc(F)cc2C1=Cc1ccc(-c2cn(-c3ccc(F)cc3)nn2)cc1	O=C1Nc2ccc(F)cc2C1=Cc1ccc(-c2cn(-c3ccc(Cl)cc3)nn2)cc1	3.71555	3.76909	-0.0535448	CHEMBL4819966	CHEMBL4819966	TRUE
Fc1ccccc1CNC1CC1c1ccccc1	Clc1ccccc1CNC1CC1c1ccccc1	6.92996	6.98338	-0.0534223	CHEMBL4253672	CHEMBL4253672	TRUE
CC(C)(C)n1nc(Cc2cc(F)cc(F)c2)c2c(N)ncnc21	CC(C)(C)n1nc(Cc2cc(F)cc(Cl)c2)c2c(N)ncnc21	7.82507	7.87844	-0.0533717	CHEMBL2330480	CHEMBL2330480	TRUE
CC1(C)CCC23CCC4(C)C5(C)CCC6C(C)(C)C(=O)C(=Cc7ccccc7F)CC6(C)C5CC(F)C4(OC2=O)C3C1	CC1(C)CCC23CCC4(C)C5(C)CCC6C(C)(C)C(=O)C(=Cc7ccccc7Cl)CC6(C)C5CC(F)C4(OC2=O)C3C1	5.75945	5.81248	-0.0530285	CHEMBL4424116	CHEMBL4424116	TRUE
COc1ccc(F)c(C(C)NC(=O)N2CCN(c3ccncc3F)CC2C)c1	COc1ccc(Cl)c(C(C)NC(=O)N2CCN(c3ccncc3F)CC2C)c1	4.88273	4.93554	-0.0528133	CHEMBL5136861	CHEMBL5136861	TRUE
O=C(c1ncc(F)cc1O)N1CCC2(CCC2)C1	O=C(c1ncc(Cl)cc1O)N1CCC2(CCC2)C1	6.45593	6.50864	-0.0527064	CHEMBL4360952	CHEMBL4360952	TRUE
COc1ccccc1CC(Oc1ncnc2sc(-c3ccc(F)o3)c(-c3ccc(OCCN4CCN(C)CC4)c(Cl)c3C)c12)C(=O)O	COc1ccccc1CC(Oc1ncnc2sc(-c3ccc(Cl)o3)c(-c3ccc(OCCN4CCN(C)CC4)c(Cl)c3C)c12)C(=O)O	7.10237	7.1549	-0.0525291	CHEMBL4677187	CHEMBL4677187	TRUE
O=c1c(-c2ccc(F)c(Cl)c2)coc2c(O)c(O)ccc12	O=c1c(-c2ccc(Cl)c(Cl)c2)coc2c(O)c(O)ccc12	5.14874	5.20066	-0.0519178	CHEMBL4268347	CHEMBL4268347	TRUE
O=C1SC(=Cc2cn(-c3ccccc3)nc2-c2ccc(F)cc2)C(=O)N1Cc1ccc([N+](=O)[O-])cc1	O=C1SC(=Cc2cn(-c3ccccc3)nc2-c2ccc(Cl)cc2)C(=O)N1Cc1ccc([N+](=O)[O-])cc1	5.266	5.31785	-0.0518542	CHEMBL4057171	CHEMBL4057171	TRUE
O=c1[nH]ccc2c(Nc3c(F)cc(F)cc3Cl)nc3ccncc3c12	O=c1[nH]ccc2c(Nc3c(Cl)cc(F)cc3Cl)nc3ccncc3c12	9.04576	9.09691	-0.0511525	CHEMBL3131376	CHEMBL3131376	TRUE
COc1cc(-n2ccc3cc(F)ccc32)cc2c1OCCN(Cc1cccnc1)C2	COc1cc(-n2ccc3cc(Cl)ccc32)cc2c1OCCN(Cc1cccnc1)C2	7.04576	7.09691	-0.0511525	CHEMBL3588430	CHEMBL3588430	TRUE
O=CC(CC1CCNC1=O)NC(=O)C(CC1CCCCC1)NC(=O)OCc1ccccc1F	O=CC(CC1CCNC1=O)NC(=O)C(CC1CCCCC1)NC(=O)OCc1ccccc1Cl	6.04576	6.09691	-0.0511525	CHEMBL3429731	CHEMBL3429731	TRUE
COc1cc(Nc2c(-c3ccc(F)cc3)nc3cnccn23)cc(OC)c1OC	COc1cc(Nc2c(-c3ccc(Cl)cc3)nc3cnccn23)cc(OC)c1OC	4.4437	4.49485	-0.0511525	CHEMBL3583317	CHEMBL3583317	TRUE
CC(C)c1ccccc1OCCN1CCC(NS(=O)(=O)c2cccc(F)c2)CC1	CC(C)c1ccccc1OCCN1CCC(NS(=O)(=O)c2cccc(Cl)c2)CC1	8.04576	8.09691	-0.0511525	CHEMBL3744654	CHEMBL3744654	TRUE
COc1cccc2c1OCC(C(=O)NCc1ncc(-c3ccc(F)cc3)[nH]1)=C2	COc1cccc2c1OCC(C(=O)NCc1ncc(-c3ccc(Cl)cc3)[nH]1)=C2	5.79022	5.84134	-0.051119	CHEMBL3875689	CHEMBL3875689	TRUE
CNC(=O)c1ccc(Nc2ncc(C(F)(F)F)c(Nc3ccc(OC)c(F)c3)n2)cc1	CNC(=O)c1ccc(Nc2ncc(C(F)(F)F)c(Nc3ccc(OC)c(Cl)c3)n2)cc1	7.40816	7.45917	-0.0510136	CHEMBL4824298	CHEMBL4824298	TRUE
O=C(c1ccc(-c2cccc(F)c2)o1)N1CCc2ccccc2C1	O=C(c1ccc(-c2cccc(Cl)c2)o1)N1CCc2ccccc2C1	4.68867	4.73945	-0.0507816	CHEMBL4153366	CHEMBL4153366	TRUE
O=C(Nc1ccc(Oc2ccnc3[nH]ccc23)c(F)c1)c1ccc(-c2ccc(F)cc2)cn1	O=C(Nc1ccc(Oc2ccnc3[nH]ccc23)c(F)c1)c1ccc(-c2ccc(Cl)cc2)cn1	5	5.05061	-0.05061	CHEMBL3756463	CHEMBL3756463	TRUE
COc1cnc2ccc(=O)n(CCN3CCN(Cc4ccc(F)cc4)CC3)c2c1	COc1cnc2ccc(=O)n(CCN3CCN(Cc4ccc(Cl)cc4)CC3)c2c1	6.04096	6.09151	-0.0505564	CHEMBL3745429	CHEMBL3745429	TRUE
O=C(Cc1cccc(Oc2ccc3nccn3n2)c1)Nc1cccc(F)c1	O=C(Cc1cccc(Oc2ccc3nccn3n2)c1)Nc1cccc(Cl)c1	4.71444	4.76447	-0.0500289	CHEMBL3378365	CHEMBL3378365	TRUE
COc1ccc(F)cc1C(=O)NC(Cc1ccccc1)C(=O)NC(CC(C)C)B(O)O	COc1ccc(Cl)cc1C(=O)NC(Cc1ccccc1)C(=O)NC(CC(C)C)B(O)O	7.07002	7.11999	-0.0499678	CHEMBL5119452	CHEMBL5119452	TRUE
O=C1CCCc2cc(OCc3ccc(F)cc3)ccc21	O=C1CCCc2cc(OCc3ccc(Cl)cc3)ccc21	6.57512	6.62342	-0.0483047	CHEMBL3292881	CHEMBL3292881	TRUE
O=C1C(=O)N(CN2CCN(Cc3cccc(F)c3)CC2)c2ccccc21	O=C1C(=O)N(CN2CCN(Cc3cccc(Cl)c3)CC2)c2ccccc21	5.72125	5.76955	-0.0483047	CHEMBL3130564	CHEMBL3130564	TRUE
Cc1cc(N2CCC(NC(=S)Nc3ccc(F)cc3)CC2)c2cc(F)ccc2n1	Cc1cc(N2CCC(NC(=S)Nc3ccc(Cl)cc3)CC2)c2cc(F)ccc2n1	4.338	4.38616	-0.0481601	CHEMBL3405734	CHEMBL3405734	TRUE
Cc1cc(N2CCC(NC(=S)Nc3ccc(F)cc3)CC2)c2cc(F)ccc2n1	Cc1cc(N2CCC(NC(=S)Nc3ccc(Cl)cc3)CC2)c2cc(F)ccc2n1	4.338	4.38616	-0.0481601	CHEMBL3405734	CHEMBL3405734	TRUE
O=S(=O)(c1ccc(F)c(F)c1)c1cnc2cc(F)ccc2c1-c1ccc(F)cc1	O=S(=O)(c1ccc(F)c(F)c1)c1cnc2cc(F)ccc2c1-c1ccc(Cl)cc1	7.71897	7.767	-0.0480373	CHEMBL4008945	CHEMBL4008945	TRUE
O=C(Nc1ccc(F)cc1)N1CCc2c([nH]c3ccccc23)C1	O=C(Nc1ccc(Cl)cc1)N1CCc2c([nH]c3ccccc23)C1	6.49894	6.54668	-0.0477409	CHEMBL4686532	CHEMBL4686532	TRUE
O=C(Nc1ccc(Cl)c(F)c1)c1ccc2[nH]ncc2c1	O=C(Nc1ccc(Cl)c(Cl)c1)c1ccc2[nH]ncc2c1	9.5376	9.58503	-0.0474246	CHEMBL4354288	CHEMBL4354288	TRUE
CNC(=O)c1c(-c2ccc(F)cc2)oc2cc(N(C)S(C)(=O)=O)c(-c3cc4c(=O)n(Cc5ccc(F)cc5)nnc4cc3F)cc12	CNC(=O)c1c(-c2ccc(F)cc2)oc2cc(N(C)S(C)(=O)=O)c(-c3cc4c(=O)n(Cc5ccc(F)cc5)nnc4cc3Cl)cc12	7.33068	7.37779	-0.0471029	CHEMBL4628146	CHEMBL4628146	TRUE
COc1cc(Oc2cccc(Nc3ccccc3)c2)cc(OC)c1CNCc1ccc(F)cc1	COc1cc(Oc2cccc(Nc3ccccc3)c2)cc(OC)c1CNCc1ccc(Cl)cc1	3.86328	3.91009	-0.0468155	CHEMBL4769623	CHEMBL4769623	TRUE
O=C(NC(=S)Nc1ccc(F)cc1)c1cn(-c2ccccc2)nc1-c1ccc(F)cc1	O=C(NC(=S)Nc1ccc(Cl)cc1)c1cn(-c2ccccc2)nc1-c1ccc(F)cc1	7.3098	7.35655	-0.0467434	CHEMBL2427325	CHEMBL2427325	TRUE
COc1cc(C(=O)c2cn(-c3cccc(C)c3)cc2-c2ccccc2F)cc(OC)c1OC	COc1cc(C(=O)c2cn(-c3cccc(C)c3)cc2-c2ccccc2Cl)cc(OC)c1OC	6.10237	6.14874	-0.0463687	CHEMBL4316276	CHEMBL4316276	TRUE
O=C(c1ccc(F)cc1)N1CCc2nc(N3CCN(c4ncccn4)CC3)ncc2C1	O=C(c1ccc(Cl)cc1)N1CCc2nc(N3CCN(c4ncccn4)CC3)ncc2C1	4.56527	4.61119	-0.0459171	CHEMBL3239734	CHEMBL3239734	TRUE
O=S(=O)(C=Cc1cccnc1Cl)c1ccc(F)cc1	O=S(=O)(C=Cc1cccnc1Cl)c1ccc(Cl)cc1	6.4698	6.5157	-0.0458999	CHEMBL4712767	CHEMBL4712767	TRUE
CC12COC(c3ccccc3)OC1CCC1(C)C2CC(OC(=O)c2cccc(F)c2)C2(C)Oc3cc(-c4cccnc4)oc(=O)c3C(O)C12	CC12COC(c3ccccc3)OC1CCC1(C)C2CC(OC(=O)c2cccc(Cl)c2)C2(C)Oc3cc(-c4cccnc4)oc(=O)c3C(O)C12	5.52288	5.56864	-0.0457575	CHEMBL2399638	CHEMBL2399638	TRUE
O=C(Nc1sc2c(c1C(=O)Nc1ccc(F)cc1)CCCCC2)c1ccccc1O	O=C(Nc1sc2c(c1C(=O)Nc1ccc(Cl)cc1)CCCCC2)c1ccccc1O	4.69897	4.74473	-0.0457575	CHEMBL4191766	CHEMBL4191766	TRUE
CN(C)C(=O)n1nnc(-c2ccc(Oc3cccc(F)c3)cc2)n1	CN(C)C(=O)n1nnc(-c2ccc(Oc3cccc(Cl)c3)cc2)n1	8	8.04576	-0.0457575	CHEMBL2379575	CHEMBL2379575	TRUE
Fc1ccccc1C1CCN(Cc2ccn3c(CC4CC4)nnc3c2C(F)(F)F)CC1	FC(F)(F)c1c(CN2CCC(c3ccccc3Cl)CC2)ccn2c(CC3CC3)nnc12	7.82391	7.86967	-0.0457575	CHEMBL3858844	CHEMBL3858844	TRUE
CC(Oc1ccc(Oc2ccc(F)cc2)cc1)C(=O)Cn1nnc(-c2ccc(C(=O)O)cc2)n1	CC(Oc1ccc(Oc2ccc(Cl)cc2)cc1)C(=O)Cn1nnc(-c2ccc(C(=O)O)cc2)n1	7	7.04576	-0.0457575	CHEMBL4383617	CHEMBL4383617	TRUE
CCn1c(CCc2ccc(NC(=O)Nc3ccccc3F)cc2)nc2ccccc21	CCn1c(CCc2ccc(NC(=O)Nc3ccccc3Cl)cc2)nc2ccccc21	6.59705	6.64226	-0.0452045	CHEMBL4308448	CHEMBL4308448	TRUE
COc1ccc2nc(NC(=O)CN3CCN(Cc4ccc(F)cc4)CC3)sc2c1	COc1ccc2nc(NC(=O)CN3CCN(Cc4ccc(Cl)cc4)CC3)sc2c1	6.6135	6.65837	-0.0448666	CHEMBL3865132	CHEMBL3865132	TRUE
O=C(NCc1ccc(O)cc1)Nc1cccc(F)c1	O=C(NCc1ccc(O)cc1)Nc1cccc(Cl)c1	4.52288	4.56767	-0.0447935	CHEMBL4821861	CHEMBL4821861	TRUE
N#Cc1c(N)c(C#N)c(-c2ccc(F)cc2)c2c1CC(c1ccccc1)S2	N#Cc1c(N)c(C#N)c(-c2ccc(Cl)cc2)c2c1CC(c1ccccc1)S2	4.4908	4.53521	-0.044415	CHEMBL2351003	CHEMBL2351003	TRUE
O=C(Nc1nc2cc(O)c(O)cc2s1)C1CCCN1S(=O)(=O)c1ccc(F)cc1	O=C(Nc1nc2cc(O)c(O)cc2s1)C1CCCN1S(=O)(=O)c1ccc(Cl)cc1	5.98716	6.03152	-0.0443543	CHEMBL4338583	CHEMBL4338583	TRUE
O=C(CN1CCCCC1)N1N=C(c2ccc(F)cc2)CC1c1ccccc1O	O=C(CN1CCCCC1)N1N=C(c2ccc(Cl)cc2)CC1c1ccccc1O	5.09583	5.13966	-0.0438364	CHEMBL3396571	CHEMBL3396571	TRUE
O=C(CN1CCCCC1)N1N=C(c2ccc(F)cc2)CC1c1ccccc1O	O=C(CN1CCCCC1)N1N=C(c2ccc(Cl)cc2)CC1c1ccccc1O	5.09583	5.13966	-0.0438364	CHEMBL3396571	CHEMBL3396571	TRUE
CSc1ccc(C(=O)C=Cc2ccc(O)c(F)c2)cc1	CSc1ccc(C(=O)C=Cc2ccc(O)c(Cl)c2)cc1	4.97062	5.01323	-0.042612	CHEMBL4818405	CHEMBL4818405	TRUE
O=C1OCC(O)=C1c1ccccc1F	O=C1OCC(O)=C1c1ccccc1Cl	4.12494	4.16749	-0.0425524	CHEMBL3602335	CHEMBL3602335	TRUE
O=C1OCC(O)=C1c1ccccc1F	O=C1OCC(O)=C1c1ccccc1Cl	4.12494	4.16749	-0.0425524	CHEMBL3602335	CHEMBL3602335	TRUE
O=C(NO)c1ccc(C(=O)Nc2n[nH]c3cc(-c4ccccc4F)ccc23)cc1	O=C(NO)c1ccc(C(=O)Nc2n[nH]c3cc(-c4ccccc4Cl)ccc23)cc1	7.18709	7.22915	-0.0420613	CHEMBL4187413	CHEMBL4187413	TRUE
Cc1noc(NS(=O)(=O)c2ccc(Nc3nccc(-c4ccc(F)cc4Cl)n3)cc2)c1C	Cc1noc(NS(=O)(=O)c2ccc(Nc3nccc(-c4ccc(Cl)cc4Cl)n3)cc2)c1C	7.25964	7.30103	-0.0413927	CHEMBL4187421	CHEMBL4187421	TRUE
O=c1ccc(-c2ccc(OCc3ccc4[nH]ccc4n3)cc2)c(-c2ccc(F)cc2)[nH]1	O=c1ccc(-c2ccc(OCc3ccc4[nH]ccc4n3)cc2)c(-c2ccc(Cl)cc2)[nH]1	9.48149	9.52288	-0.0413927	CHEMBL3635514	CHEMBL3635514	TRUE
COc1cc(-c2ccc(F)c(C)c2)c(F)cc1-n1c(=O)ccc2cc(S(=O)(=O)Nc3ccon3)ccc21	COc1cc(-c2ccc(Cl)c(C)c2)c(F)cc1-n1c(=O)ccc2cc(S(=O)(=O)Nc3ccon3)ccc21	7.95861	8	-0.0413927	CHEMBL4012328	CHEMBL4012328	TRUE
O=C(CN1C(=O)C(=Cc2ccc(F)cc2)SC1=S)c1ccccc1	O=C(CN1C(=O)C(=Cc2ccc(Cl)cc2)SC1=S)c1ccccc1	4.25964	4.30016	-0.040525	CHEMBL4481956	CHEMBL4481956	TRUE
CC(C)Sc1nnc(COc2ccccc2)n1-c1cccc(F)c1	CC(C)Sc1nnc(COc2ccccc2)n1-c1cccc(Cl)c1	5.68613	5.72584	-0.0397094	CHEMBL2317274	CHEMBL2317274	TRUE
O=C(O)CN1C(=O)SC(=Cc2ccc(F)cc2)C1=O	O=C(O)CN1C(=O)SC(=Cc2ccc(Cl)cc2)C1=O	4.03621	4.07572	-0.0395085	CHEMBL4842189	CHEMBL4842189	TRUE
CNC(=O)C(C)Cn1cnc2ccc(-c3cnc(OC)c(NS(=O)(=O)c4ccc(F)cc4Cl)c3)cc2c1=O	CNC(=O)C(C)Cn1cnc2ccc(-c3cnc(OC)c(NS(=O)(=O)c4ccc(Cl)cc4Cl)c3)cc2c1=O	8.63827	8.67778	-0.0395085	CHEMBL4621919	CHEMBL4621919	TRUE
CNc1nc(CCc2cccc(F)c2)nc2sc(C(=O)O)c(C)c12	CNc1nc(CCc2cccc(Cl)c2)nc2sc(C(=O)O)c(C)c12	5.63827	5.67778	-0.0395085	CHEMBL4006593	CHEMBL4006593	TRUE
O=C(Nc1ccnc(NC(=O)C2CC2F)c1)c1c(F)cccc1Cl	O=C(Nc1ccnc(NC(=O)C2CC2F)c1)c1c(Cl)cccc1Cl	6.67572	6.71444	-0.0387251	CHEMBL2389438	CHEMBL2389438	TRUE
Cc1ncc(Cn2cc(COC(=O)c3ccc(F)cc3)nn2)c(N)n1	Cc1ncc(Cn2cc(COC(=O)c3ccc(Cl)cc3)nn2)c(N)n1	5.41117	5.44977	-0.0386034	CHEMBL4390730	CHEMBL4390730	TRUE
N#CC1=C(NC(=O)CN2CCOCC2)Oc2c(c(=O)oc3ccccc23)C1c1ccc(F)cc1	N#CC1=C(NC(=O)CN2CCOCC2)Oc2c(c(=O)oc3ccccc23)C1c1ccc(Cl)cc1	4	4.03858	-0.0385789	CHEMBL4055601	CHEMBL4055601	TRUE
O=C1Nc2ccc(F)cc2C1=NNC(=O)c1ccc(NC(=O)c2ccc(Cl)cc2)cc1	O=C1Nc2ccc(Cl)cc2C1=NNC(=O)c1ccc(NC(=O)c2ccc(Cl)cc2)cc1	5.34294	5.38091	-0.0379625	CHEMBL4330587	CHEMBL4330587	TRUE
CN1CCc2c(sc3ncnc(Nc4cccc(F)c4)c23)C1	CN1CCc2c(sc3ncnc(Nc4cccc(Cl)c4)c23)C1	5.69037	5.72816	-0.0377886	CHEMBL4341772	CHEMBL4341772	TRUE
O=c1ncn(Cc2ccc(F)cc2)c2ccc(Oc3ncccc3C(F)(F)F)cc12	O=c1ncn(Cc2ccc(Cl)cc2)c2ccc(Oc3ncccc3C(F)(F)F)cc12	5.92082	5.95861	-0.0377886	CHEMBL2405555	CHEMBL2405555	TRUE
COCc1nn(Cc2ccc(Cn3ccccc3=O)cc2)cc1C(=O)NCc1c(F)ccc(OC)c1F	COCc1nn(Cc2ccc(Cn3ccccc3=O)cc2)cc1C(=O)NCc1c(Cl)ccc(OC)c1F	8.22185	8.25964	-0.0377886	CHEMBL5112809	CHEMBL5112809	TRUE
O=C(C=CNc1cc(-c2ccccc2)nn1-c1ccccc1)c1ccc(F)cc1	O=C(C=CNc1cc(-c2ccccc2)nn1-c1ccccc1)c1ccc(Cl)cc1	6.87615	6.91364	-0.0374918	CHEMBL4812190	CHEMBL4812190	TRUE
O=C(Cc1ccc(F)c(Cl)c1)c1ccc(O)c(O)c1O	O=C(Cc1ccc(Cl)c(Cl)c1)c1ccc(O)c(O)c1O	5.01323	5.05061	-0.0373817	CHEMBL4268347	CHEMBL4268347	TRUE
CC(=O)/C=C/[CH](CCc1ccccc1)NC(=O)[CH](Cc1ccccc1)NC(=O)Nc1ccc(F)cc1	CC(=O)/C=C/[CH](CCc1ccccc1)NC(=O)[CH](Cc1ccccc1)NC(=O)Nc1ccc(Cl)cc1	9.07058	9.10791	-0.0373243	CHEMBL5125638	CHEMBL5125638	TRUE
CC(=O)N1N=C(c2ccc(F)cc2)CC1c1ccc2c(c1)OCO2	CC(=O)N1N=C(c2ccc(Cl)cc2)CC1c1ccc2c(c1)OCO2	5.13668	5.174	-0.0373226	CHEMBL2344662	CHEMBL2344662	TRUE
Cc1cc(NC(=O)c2occc2C)ccc1N1C(=O)c2cccc(F)c2C1=O	Cc1cc(NC(=O)c2occc2C)ccc1N1C(=O)c2cccc(Cl)c2C1=O	5.95861	5.99568	-0.0370713	CHEMBL3635104	CHEMBL3635104	TRUE
O=C(CCN1CCc2ccccc2C1)Nc1cccc(F)c1	O=C(CCN1CCc2ccccc2C1)Nc1cccc(Cl)c1	4.33847	4.37541	-0.0369373	CHEMBL4327371	CHEMBL4327371	TRUE
NC(=O)c1c(NC(=O)c2ccc([N+](=O)[O-])o2)sc2c1CCN(C(=S)Nc1ccc(F)cc1)C2	NC(=O)c1c(NC(=O)c2ccc([N+](=O)[O-])o2)sc2c1CCN(C(=S)Nc1ccc(Cl)cc1)C2	4.68069	4.7176	-0.0369188	CHEMBL3123111	CHEMBL3123111	TRUE
O=C1c2ccccc2C(=O)N1c1nc(-c2ccc(F)cc2)cs1	O=C1c2ccccc2C(=O)N1c1nc(-c2ccc(Cl)cc2)cs1	4.54424	4.58104	-0.0367944	CHEMBL3997084	CHEMBL3997084	TRUE
CCN(CC)CCCC(C)Nc1nc(C=Cc2ccc(F)c(F)c2)nc2ccc(F)cc12	CCN(CC)CCCC(C)Nc1nc(C=Cc2ccc(F)c(F)c2)nc2ccc(Cl)cc12	4.94424	4.98088	-0.0366442	CHEMBL4315097	CHEMBL4315097	TRUE
Cc1cc(-c2cnc3ccn(CC(=O)N(C)C)c3c2)ccc1F	Cc1cc(-c2cnc3ccn(CC(=O)N(C)C)c3c2)ccc1Cl	7.60206	7.63827	-0.0362122	CHEMBL4339649	CHEMBL4339649	TRUE
O=S(=O)(c1cccs1)N1CCc2c(sc3ncnc(Nc4cccc(F)c4)c23)C1	O=S(=O)(c1cccs1)N1CCc2c(sc3ncnc(Nc4cccc(Cl)c4)c23)C1	5.82391	5.86012	-0.0362122	CHEMBL4341772	CHEMBL4341772	TRUE
Fc1ccc(C2=NN(c3ccccc3)C(c3cccc(Cl)c3Cl)C2)cc1	Clc1ccc(C2=NN(c3ccccc3)C(c3cccc(Cl)c3Cl)C2)cc1	4.9546	4.9908	-0.0362054	CHEMBL4056827	CHEMBL4056827	TRUE
O=C(NN=Cc1ccc(F)cc1)c1cnc2c(F)cccc2c1O	O=C(NN=Cc1ccc(Cl)cc1)c1cnc2c(F)cccc2c1O	4.58004	4.61618	-0.0361404	CHEMBL3815689	CHEMBL3815689	TRUE
COc1ccc(C=Cc2cc(NCCN(C)C)c3cc(F)ccc3n2)cc1	COc1ccc(C=Cc2cc(NCCN(C)C)c3cc(Cl)ccc3n2)cc1	7.42251	7.45842	-0.0359126	CHEMBL4671338	CHEMBL4671338	TRUE
O=C(Nc1ccc(Cl)cc1)Nc1ccc(C(=O)NN=C2C(=O)Nc3ccc(F)cc32)cc1	O=C(Nc1ccc(Cl)cc1)Nc1ccc(C(=O)NN=C2C(=O)Nc3ccc(Cl)cc32)cc1	5.36452	5.40012	-0.0356007	CHEMBL4330587	CHEMBL4330587	TRUE
COc1cc(C=CC(=O)c2cccc(NS(=O)(=O)c3ccc(F)cc3)c2)ccc1O	COc1cc(C=CC(=O)c2cccc(NS(=O)(=O)c3ccc(Cl)cc3)c2)ccc1O	5.19382	5.22915	-0.035328	CHEMBL3626804	CHEMBL3626804	TRUE
COc1cc(C=CC(=O)c2cccc(NS(=O)(=O)c3ccc(F)cc3)c2)ccc1O	COc1cc(C=CC(=O)c2cccc(NS(=O)(=O)c3ccc(Cl)cc3)c2)ccc1O	5.19382	5.22915	-0.035328	CHEMBL3626804	CHEMBL3626804	TRUE
Nc1ncnc2c1c(-c1cccc(F)c1)cn2C1CCC(N)CC1	Nc1ncnc2c1c(-c1cccc(Cl)c1)cn2C1CCC(N)CC1	8.19382	8.22915	-0.035328	CHEMBL5136571	CHEMBL5136571	TRUE
N#Cc1cn(Cc2cccc(F)c2)c2ccc(NC(=O)c3cc(=O)[nH]cn3)cc12	N#Cc1cn(Cc2cccc(Cl)c2)c2ccc(NC(=O)c3cc(=O)[nH]cn3)cc12	5.84771	5.88273	-0.035017	CHEMBL5144234	CHEMBL5144234	TRUE
O=C(O)c1ccccc1Nc1cc(F)cc(C(F)(F)F)c1	O=C(O)c1ccccc1Nc1cc(Cl)cc(C(F)(F)F)c1	5.18709	5.22185	-0.0347621	CHEMBL3090351	CHEMBL3090351	TRUE
O=c1cc(NCCCN2CCN(c3nccc4ccccc34)CC2)c2cc(F)ccc2o1	O=c1cc(NCCCN2CCN(c3nccc4ccccc34)CC2)c2cc(Cl)ccc2o1	5.88606	5.92082	-0.0347621	CHEMBL4374981	CHEMBL4374981	TRUE
O=C(O)CCC(NC(=O)C(CC(=O)O)NC(=O)C(Cc1ccc2ccccc2c1)NC(=O)c1cc2cc(Cl)ccc2[nH]1)C(=O)Nc1cccc(F)c1	O=C(O)CCC(NC(=O)C(CC(=O)O)NC(=O)C(Cc1ccc2ccccc2c1)NC(=O)c1cc2cc(Cl)ccc2[nH]1)C(=O)Nc1cccc(Cl)c1	4.88606	4.92082	-0.0347621	CHEMBL4339580	CHEMBL4339580	TRUE
Cc1ccc2nc(-c3ccc(F)c(Cl)c3)c(NCc3ccccc3)n2c1	Cc1ccc2nc(-c3ccc(Cl)c(Cl)c3)c(NCc3ccccc3)n2c1	7.58503	7.61979	-0.0347621	CHEMBL4040778	CHEMBL4040778	TRUE
O=C(Nc1sc2c(c1C(=O)Nc1ccccn1)CCCCC2)c1ccccc1F	O=C(Nc1sc2c(c1C(=O)Nc1ccccn1)CCCCC2)c1ccccc1Cl	3.83863	3.8729	-0.0342632	CHEMBL3110996	CHEMBL3110996	TRUE
CC(=O)N1N=C(c2ccc(F)cc2)CC1c1ccc2c(c1)OCCO2	CC(=O)N1N=C(c2ccc(Cl)cc2)CC1c1ccc2c(c1)OCCO2	4.59	4.623	-0.0330001	CHEMBL2344662	CHEMBL2344662	TRUE
CN1CCC(c2c(O)cc(O)c3c(=O)cc(C=Cc4ccccc4F)oc23)C(O)C1	CN1CCC(c2c(O)cc(O)c3c(=O)cc(C=Cc4ccccc4Cl)oc23)C(O)C1	5.81816	5.85078	-0.0326245	CHEMBL4048311	CHEMBL4048311	TRUE
CC(C)=CCN1C(=O)C(=NNC(=O)c2ccc(F)cc2)c2ccccc21	CC(C)=CCN1C(=O)C(=NNC(=O)c2ccc(Cl)cc2)c2ccccc21	3.81248	3.84466	-0.0321847	CHEMBL4266983	CHEMBL4266983	TRUE
Fc1cccc(-c2cccc3ncnn23)c1	Clc1cccc(-c2cccc3ncnn23)c1	4.55284	4.58503	-0.0321847	CHEMBL4017304	CHEMBL4017304	TRUE
CN(C)CCNc1cc(C=Cc2ccc([N+](=O)[O-])cc2)nc2ccc(F)cc12	CN(C)CCNc1cc(C=Cc2ccc([N+](=O)[O-])cc2)nc2ccc(Cl)cc12	7.51004	7.54212	-0.0320766	CHEMBL4671338	CHEMBL4671338	TRUE
CCOC(=O)C1C(=O)NC(NC(C)=O)=NC1c1ccc(F)cc1	CCOC(=O)C1C(=O)NC(NC(C)=O)=NC1c1ccc(Cl)cc1	4.0157	4.0475	-0.0318004	CHEMBL3292277	CHEMBL3292277	TRUE
Nc1nnc(Cc2ccc(Cl)cc2Oc2ccccc2F)o1	Nc1nnc(Cc2ccc(Cl)cc2Oc2ccccc2Cl)o1	8.72469	8.75622	-0.0315294	CHEMBL3122360	CHEMBL3122360	TRUE
CC(=O)c1ccc(OCc2ccc(F)cc2)cc1F	CC(=O)c1ccc(OCc2ccc(Cl)cc2)cc1F	7.24496	7.2763	-0.031334	CHEMBL3863357	CHEMBL3863357	TRUE
O=S(=O)(c1cccs1)N1CCc2c(sc3ncnc(Nc4ccc(F)cc4F)c23)C1	O=S(=O)(c1cccs1)N1CCc2c(sc3ncnc(Nc4ccc(Cl)cc4F)c23)C1	5.83565	5.86646	-0.0308139	CHEMBL4341772	CHEMBL4341772	TRUE
CCn1c(CNc2ccc(C(=N)N)cc2)nc2cc(C(=O)N(CCC(=O)O)c3ccc(F)c(F)c3)ccc21	CCn1c(CNc2ccc(C(=N)N)cc2)nc2cc(C(=O)N(CCC(=O)O)c3ccc(F)c(Cl)c3)ccc21	8.02	8.04998	-0.0299795	CHEMBL3745444	CHEMBL3745444	TRUE
Cc1ccc(S(=O)(=O)NC(CC(=O)NC(C)(C)C)C(=O)NCCNC(=O)c2ccc(F)cc2)cc1	Cc1ccc(S(=O)(=O)NC(CC(=O)NC(C)(C)C)C(=O)NCCNC(=O)c2ccc(Cl)cc2)cc1	6.91721	6.94692	-0.0297069	CHEMBL4364841	CHEMBL4364841	TRUE
O=S(=O)(c1ccccc1F)n1cc(C(F)F)c2c(N3CCNCC3)cccc21	O=S(=O)(c1ccccc1Cl)n1cc(C(F)F)c2c(N3CCNCC3)cccc21	9.33724	9.36653	-0.0292894	CHEMBL5109505	CHEMBL5109505	TRUE
O=C(COc1cccc(F)c1)N1CCN(c2cccc([N+](=O)[O-])c2)CC1	O=C(COc1cccc(Cl)c1)N1CCN(c2cccc([N+](=O)[O-])c2)CC1	5.20761	5.23657	-0.0289637	CHEMBL4432710	CHEMBL4432710	TRUE
CC12COC(c3ccccc3)OC1CCC1(C)C2CC(OC(=O)c2ccc(F)cc2)C2(C)Oc3cc(-c4cccnc4)oc(=O)c3C(O)C12	CC12COC(c3ccccc3)OC1CCC1(C)C2CC(OC(=O)c2ccc(Cl)cc2)C2(C)Oc3cc(-c4cccnc4)oc(=O)c3C(O)C12	5.20761	5.23657	-0.0289637	CHEMBL2399638	CHEMBL2399638	TRUE
O=C(Cn1c(Cl)cnc(NCC(F)(F)c2cccc[n+]2[O-])c1=O)NCc1ncccc1F	O=C(Cn1c(Cl)cnc(NCC(F)(F)c2cccc[n+]2[O-])c1=O)NCc1ncccc1Cl	8.50864	8.5376	-0.0289637	CHEMBL4196334	CHEMBL4196334	TRUE
O=C(Nc1ccccc1)Nc1ccc(C(=O)NN=C2C(=O)Nc3ccc(F)cc32)cc1	O=C(Nc1ccccc1)Nc1ccc(C(=O)NN=C2C(=O)Nc3ccc(Cl)cc32)cc1	5.37469	5.4034	-0.0287154	CHEMBL4330587	CHEMBL4330587	TRUE
Cc1c(C(C#N)c2c(F)cccc2F)nc(SC(C)C)[nH]c1=O	Cc1c(C(C#N)c2c(F)cccc2Cl)nc(SC(C)C)[nH]c1=O	7.10237	7.13077	-0.0283954	CHEMBL5140369	CHEMBL5140369	TRUE
Nc1nc(OC(c2ccc(Cl)cc2-c2cccc(F)c2)C(F)(F)F)cc(N2CCC3(CC2)CNC(C(=O)O)C3)n1	Nc1nc(OC(c2ccc(Cl)cc2-c2cccc(Cl)c2)C(F)(F)F)cc(N2CCC3(CC2)CNC(C(=O)O)C3)n1	7.49485	7.52288	-0.0280287	CHEMBL4001798	CHEMBL4001798	TRUE
COc1ccc(-c2nn(-c3ccccc3)cc2C(=O)NC(=S)Nc2ccc(F)cc2)cc1	COc1ccc(-c2nn(-c3ccccc3)cc2C(=O)NC(=S)Nc2ccc(Cl)cc2)cc1	7.49485	7.52288	-0.0280287	CHEMBL2427325	CHEMBL2427325	TRUE
Oc1c(C(Nc2ccccn2)c2ccccc2F)ccc2cccnc12	Oc1c(C(Nc2ccccn2)c2ccccc2Cl)ccc2cccnc12	5	5.02687	-0.0268721	CHEMBL4729814	CHEMBL4729814	TRUE
Cc1ccc(NC(=O)C=Cc2cc(-c3cnc4[nH]ccc4c3)ccc2F)cc1C(F)(F)F	Cc1ccc(NC(=O)C=Cc2cc(-c3cnc4[nH]ccc4c3)ccc2Cl)cc1C(F)(F)F	6.70509	6.73189	-0.0267972	CHEMBL5119586	CHEMBL5119586	TRUE
COc1cc(Sc2c(-c3ccccc3)[nH]c3cccc(F)c23)cc(OC)c1OC	COc1cc(Sc2c(-c3ccccc3)[nH]c3cccc(Cl)c23)cc(OC)c1OC	5.76955	5.79588	-0.0263289	CHEMBL3599631	CHEMBL3599631	TRUE
O=C(CCCCCCNC(=O)c1cnc(-c2ccc(F)cc2)s1)NO	O=C(CCCCCCNC(=O)c1cnc(-c2ccc(Cl)cc2)s1)NO	5.9914	6.01773	-0.0263289	CHEMBL5044660	CHEMBL5044660	TRUE
O=C(CCC(=O)OCCCCCCSc1ccc([N+](=O)[O-])c2nonc12)Nc1ccccc1F	O=C(CCC(=O)OCCCCCCSc1ccc([N+](=O)[O-])c2nonc12)Nc1ccccc1Cl	6.45593	6.48149	-0.0255541	CHEMBL4737005	CHEMBL4737005	TRUE
O=c1c(-c2ccccc2F)c2ccccn2c(=O)n1CCCCN1CCCC(c2c[nH]c3ccccc23)C1	O=c1c(-c2ccccc2Cl)c2ccccn2c(=O)n1CCCCN1CCCC(c2c[nH]c3ccccc23)C1	7.27572	7.30103	-0.0253059	CHEMBL4401060	CHEMBL4401060	TRUE
N=C(N)N1CCN(c2ccc(C=Cc3cc(F)cc(-c4ccncc4)c3)cc2)CC1	N=C(N)N1CCN(c2ccc(C=Cc3cc(Cl)cc(-c4ccncc4)c3)cc2)CC1	7.74473	7.76955	-0.0248236	CHEMBL4124009	CHEMBL4124009	TRUE
O=S1(=O)CCc2c(-c3ccccc3)nn(-c3ccccc3F)c2O1	O=S1(=O)CCc2c(-c3ccccc3)nn(-c3ccccc3Cl)c2O1	6.74473	6.76955	-0.0248236	CHEMBL4708126	CHEMBL4708126	TRUE
O=C(COc1cc(=O)oc2ccccc12)N1CCN(c2ccc(F)cc2)CC1	O=C(COc1cc(=O)oc2ccccc12)N1CCN(c2ccc(Cl)cc2)CC1	4.42516	4.44989	-0.0247352	CHEMBL3387730	CHEMBL3387730	TRUE
CC(O)C(N)C(=O)NC(CNC(=O)CCn1cnc2cc(Cl)c(F)cc2c1=O)c1cccc(-c2ccccc2)c1	CC(O)C(N)C(=O)NC(CNC(=O)CCn1cnc2cc(Cl)c(Cl)cc2c1=O)c1cccc(-c2ccccc2)c1	6.25964	6.284	-0.0243593	CHEMBL5163597	CHEMBL5163597	TRUE
CC1=C(CC(=O)O)c2cc(F)ccc2C1=Cc1cccc(F)c1	CC1=C(CC(=O)O)c2cc(F)ccc2C1=Cc1cccc(Cl)c1	5.73518	5.75945	-0.0242686	CHEMBL4827023	CHEMBL4827023	TRUE
O=C(NCCCN1CCOCC1)C(=O)NN=Cc1cccc(COc2ccccc2F)c1	O=C(NCCCN1CCOCC1)C(=O)NN=Cc1cccc(COc2ccccc2Cl)c1	4.66615	4.69037	-0.02422	CHEMBL4622739	CHEMBL4622739	TRUE
COc1ccc(C=Cc2cc(NCCN(C)C)c3cc(F)ccc3n2)cc1OC	COc1ccc(C=Cc2cc(NCCN(C)C)c3cc(Cl)ccc3n2)cc1OC	7.38616	7.41005	-0.0238922	CHEMBL4671338	CHEMBL4671338	TRUE
O=C(NC(=S)Nc1ccc(F)cc1)c1cn(-c2ccccc2)nc1-c1ccccc1	O=C(NC(=S)Nc1ccc(Cl)cc1)c1cn(-c2ccccc2)nc1-c1ccccc1	7.12494	7.14874	-0.0238029	CHEMBL2427325	CHEMBL2427325	TRUE
CNCCN1CCC(OCc2ccc(F)cc2)CC1	CNCCN1CCC(OCc2ccc(Cl)cc2)CC1	7.72125	7.74473	-0.0234811	CHEMBL3859042	CHEMBL3859042	TRUE
COc1ncc(-c2ccc3c(c2)N(c2ccc(F)cc2)C(=O)CO3)cc1NS(=O)(=O)c1ccc(F)cc1	COc1ncc(-c2ccc3c(c2)N(c2ccc(Cl)cc2)C(=O)CO3)cc1NS(=O)(=O)c1ccc(F)cc1	7.72125	7.74473	-0.0234811	CHEMBL4366253	CHEMBL4366253	TRUE
COc1ccc(NC(=O)CN2C(=O)SC(=Cc3ccc(F)cc3)C2=O)cc1	COc1ccc(NC(=O)CN2C(=O)SC(=Cc3ccc(Cl)cc3)C2=O)cc1	6.40894	6.432	-0.0230625	CHEMBL4314448	CHEMBL4314448	TRUE
O=C(Nc1nc2cc(-c3ccc(F)cc3)ccn2n1)c1cccc(Cl)c1	O=C(Nc1nc2cc(-c3ccc(Cl)cc3)ccn2n1)c1cccc(Cl)c1	4.06956	4.09259	-0.0230282	CHEMBL4372320	CHEMBL4372320	TRUE
CCC(=C(c1ccc(C=CC(=O)O)cc1)c1cc2ccccc2[nH]1)c1ccc(F)cc1Cl	CCC(=C(c1ccc(C=CC(=O)O)cc1)c1cc2ccccc2[nH]1)c1ccc(Cl)cc1Cl	8.79588	8.81816	-0.0222764	CHEMBL4703592	CHEMBL4703592	TRUE
COc1ccccc1CC(Oc1ncnc2sc(-c3cccc(F)c3)c(-c3ccc(OCCN4CCN(C)CC4)c(Cl)c3C)c12)C(=O)O	COc1ccccc1CC(Oc1ncnc2sc(-c3cccc(Cl)c3)c(-c3ccc(OCCN4CCN(C)CC4)c(Cl)c3C)c12)C(=O)O	6.69897	6.72125	-0.0222764	CHEMBL4677187	CHEMBL4677187	TRUE
Cn1nc(-c2ccc3c(c2)CCN3C(=O)Cc2cccc(F)c2)c2c(N)ncnc21	Cn1nc(-c2ccc3c(c2)CCN3C(=O)Cc2cccc(Cl)c2)c2c(N)ncnc21	7.21467	7.23657	-0.0219018	CHEMBL4261372	CHEMBL4261372	TRUE
O=C(NCc1cccc(OCCCOc2nc[nH]n2)c1)c1nc2scc(-c3ccccc3F)c2c(=O)[nH]1	O=C(NCc1cccc(OCCCOc2nc[nH]n2)c1)c1nc2scc(-c3ccccc3Cl)c2c(=O)[nH]1	10.2076	10.2291	-0.0215397	CHEMBL4000924	CHEMBL4000924	TRUE
CN1CC(c2ccc(F)cc2)C2(CSc3ccccc3C2=O)C12C(=O)c1ccccc1C2=O	CN1CC(c2ccc(Cl)cc2)C2(CSc3ccccc3C2=O)C12C(=O)c1ccccc1C2=O	4.63227	4.65287	-0.0205938	CHEMBL4719111	CHEMBL4719111	TRUE
CC(C)(C)NC(=O)[CH]1C[CH]2CCCC[CH]2CN1C[CH](O)CNCc1cccc(F)c1	CC(C)(C)NC(=O)[CH]1C[CH]2CCCC[CH]2CN1C[CH](O)CNCc1cccc(Cl)c1	6.18709	6.20761	-0.0205217	CHEMBL5118626	CHEMBL5118626	TRUE
CCOC(=O)c1sc(-c2ccncc2)nc1-c1ccc(F)cc1Cl	CCOC(=O)c1sc(-c2ccncc2)nc1-c1ccc(Cl)cc1Cl	5.9914	6.01189	-0.0204873	CHEMBL3266077	CHEMBL3266077	TRUE
COc1cccc(-c2cc(C(=O)Nc3ccc(F)cc3)ccc2OC)c1	COc1cccc(-c2cc(C(=O)Nc3ccc(Cl)cc3)ccc2OC)c1	5.19928	5.21968	-0.0203998	CHEMBL5135978	CHEMBL5135978	TRUE
Fc1ccc2c(Cn3cncn3)c(-c3ccc(Cl)cc3)[nH]c2c1	Clc1ccc(-c2[nH]c3cc(Cl)ccc3c2Cn2cncn2)cc1	6.66274	6.68298	-0.0202414	CHEMBL4143196	CHEMBL4143196	TRUE
CC1CN(c2ccc(F)cc2)CCN1c1nccc(C(=O)NC2C3CC4CC2CC(O)(C4)C3)n1	CC1CN(c2ccc(Cl)cc2)CCN1c1nccc(C(=O)NC2C3CC4CC2CC(O)(C4)C3)n1	7.65758	7.67778	-0.0202034	CHEMBL4681492	CHEMBL4681492	TRUE
NC(COP(=O)(O)OCCCOC(=O)CCc1ccccc1OCc1cccc(Oc2ccc(F)cc2)c1)C(=O)O	NC(COP(=O)(O)OCCCOC(=O)CCc1ccccc1OCc1cccc(Oc2ccc(Cl)cc2)c1)C(=O)O	6.92082	6.93998	-0.0191637	CHEMBL4014236	CHEMBL4014236	TRUE
COc1cc(C=CC(=O)N2CCN(Cc3ccccc3F)CC2)ccc1O	COc1cc(C=CC(=O)N2CCN(Cc3ccccc3Cl)CC2)ccc1O	4.79888	4.81787	-0.0189947	CHEMBL4811144	CHEMBL4811144	TRUE
Cc1nn(C)c(O)c1C(=O)c1ccc2nc(C)n(-c3ccc(F)cc3)c(=O)c2c1	Cc1nn(C)c(O)c1C(=O)c1ccc2nc(C)n(-c3ccc(Cl)cc3)c(=O)c2c1	6.6073	6.62525	-0.0179486	CHEMBL3388490	CHEMBL3388490	TRUE
CC1(C)Cc2c(c(C(=O)Nc3ccccc3C(F)(F)F)cc3nc(Nc4c(F)cccc4Cl)[nH]c23)O1	CC1(C)Cc2c(c(C(=O)Nc3ccccc3C(F)(F)F)cc3nc(Nc4c(Cl)cccc4Cl)[nH]c23)O1	8.29243	8.3098	-0.0173741	CHEMBL4221859	CHEMBL4221859	TRUE
COc1cc(CN(CC2CCC(C(=O)O)CC2)C2CCc3c2ccc(Cl)c3F)ccc1OCCN1C(=O)CCC1=O	COc1cc(CN(CC2CCC(C(=O)O)CC2)C2CCc3c2ccc(Cl)c3Cl)ccc1OCCN1C(=O)CCC1=O	7.58503	7.60206	-0.0170333	CHEMBL3865102	CHEMBL3865102	TRUE
Cc1ccc2[nH]c(-n3[nH]c(C)c(Cc4ccc(F)cc4)c3=O)nc2c1	Cc1ccc2[nH]c(-n3[nH]c(C)c(Cc4ccc(Cl)cc4)c3=O)nc2c1	6.10791	6.12494	-0.0170333	CHEMBL3119218	CHEMBL3119218	TRUE
O=C(NC1CCN(Cc2ccc(OC3CCNCC3)c(Br)c2)CC1)c1cc2cc(F)ccc2s1	O=C(NC1CCN(Cc2ccc(OC3CCNCC3)c(Br)c2)CC1)c1cc2cc(Cl)ccc2s1	7.27572	7.29243	-0.0167057	CHEMBL3859200	CHEMBL3859200	TRUE
CN1C2CCC1C(c1cc(-c3ccc(F)cc3)no1)C(OC(c1ccc(F)cc1)c1ccc(F)cc1)C2	CN1C2CCC1C(c1cc(-c3ccc(Cl)cc3)no1)C(OC(c1ccc(F)cc1)c1ccc(F)cc1)C2	7.15989	7.17653	-0.0166319	CHEMBL4027497	CHEMBL4027497	TRUE
Fc1cccc(CCn2cnc3c(N4CCNCC4)ccnc32)c1	Clc1cccc(CCn2cnc3c(N4CCNCC4)ccnc32)c1	5.88673	5.90274	-0.0160174	CHEMBL4146371	CHEMBL4146371	TRUE
O=C(NCc1ccccc1F)C1(O)CCN(c2ccccc2)C1=O	O=C(NCc1ccccc1Cl)C1(O)CCN(c2ccccc2)C1=O	6.55284	6.56864	-0.0157943	CHEMBL4397057	CHEMBL4397057	TRUE
O=S(=O)(Nc1ccccc1NS(=O)(=O)c1ccc(F)cc1)c1ccc(F)cc1	O=S(=O)(Nc1ccccc1NS(=O)(=O)c1ccc(Cl)cc1)c1ccc(F)cc1	4.54821	4.56384	-0.0156238	CHEMBL4150505	CHEMBL4150505	TRUE
O=C1C(=NN=Cc2coc3ccccc3c2=O)c2ccccc2N1Cc1ccccc1F	O=C1C(=NN=Cc2coc3ccccc3c2=O)c2ccccc2N1Cc1ccccc1Cl	4.85325	4.86838	-0.0151293	CHEMBL4182788	CHEMBL4182788	TRUE
CN1CCN(Cc2cn(S(=O)(=O)c3ccc(F)cc3F)c3ccccc23)CC1	CN1CCN(Cc2cn(S(=O)(=O)c3ccc(F)cc3Cl)c3ccccc23)CC1	7.52288	7.5376	-0.0147233	CHEMBL4009037	CHEMBL4009037	TRUE
COCc1cccnc1-n1cc(CN2CCC3(CC2)OCCc2cc(F)sc23)c(C)n1	COCc1cccnc1-n1cc(CN2CCC3(CC2)OCCc2cc(Cl)sc23)c(C)n1	10.0273	10.0419	-0.0145797	CHEMBL3243886	CHEMBL3243886	TRUE
Cc1nc(C)c(-c2csc(Nc3ccc(C(=O)N4C5CCC4CN(c4ncc(F)cn4)C5)cn3)n2)s1	Cc1nc(C)c(-c2csc(Nc3ccc(C(=O)N4C5CCC4CN(c4ncc(Cl)cn4)C5)cn3)n2)s1	9.50864	9.52288	-0.0142404	CHEMBL4050581	CHEMBL4050581	TRUE
COc1cc(Oc2cccc(Nc3ccccc3)c2)cc(OC)c1CNCCc1ccc(F)cc1	COc1cc(Oc2cccc(Nc3ccccc3)c2)cc(OC)c1CNCCc1ccc(Cl)cc1	4.02228	4.03621	-0.0139358	CHEMBL4769623	CHEMBL4769623	TRUE
CCOC(=O)c1c(C)nc(-c2cccc(C#N)c2)n1OCc1ccccc1F	CCOC(=O)c1c(C)nc(-c2cccc(C#N)c2)n1OCc1ccccc1Cl	5.04639	5.06023	-0.013846	CHEMBL4678938	CHEMBL4678938	TRUE
Fc1cccc(Cc2nnc(Cn3nnc4ccccc43)o2)c1	Clc1cccc(Cc2nnc(Cn3nnc4ccccc43)o2)c1	5.48149	5.49485	-0.013364	CHEMBL3784610	CHEMBL3784610	TRUE
CN(C)CCCC1(c2ccc(F)cc2)OCc2cc(C(=O)NNC(=O)c3ccccc3F)ccc21	CN(C)CCCC1(c2ccc(F)cc2)OCc2cc(C(=O)NNC(=O)c3ccccc3Cl)ccc21	4.14642	4.15952	-0.0130941	CHEMBL4192266	CHEMBL4192266	TRUE
O=C(c1ccc(-c2ccc(F)cc2)o1)N1CCN(Cc2ccc(OC3CCNCC3)c(Cl)c2)CC1	O=C(c1ccc(-c2ccc(Cl)cc2)o1)N1CCN(Cc2ccc(OC3CCNCC3)c(Cl)c2)CC1	7.16749	7.18046	-0.012965	CHEMBL4332940	CHEMBL4332940	TRUE
CN1CCN(Cc2cn(S(=O)(=O)c3ccc(F)cc3Cl)c3ccccc23)CC1	CN1CCN(Cc2cn(S(=O)(=O)c3ccc(Cl)cc3Cl)c3ccccc23)CC1	7.5376	7.54975	-0.0121489	CHEMBL4009037	CHEMBL4009037	TRUE
CCn1cc(NC(=O)NCc2ccc(F)cc2)c2cc(NC(=O)c3ccc(CN4CCOCC4)cc3)ccc21	CCn1cc(NC(=O)NCc2ccc(Cl)cc2)c2cc(NC(=O)c3ccc(CN4CCOCC4)cc3)ccc21	6.95861	6.97062	-0.0120089	CHEMBL4723504	CHEMBL4723504	TRUE
O=C1CCCC(O)=C1C(=O)c1cccc(OCc2ccc(Cl)cc2F)c1	O=C1CCCC(O)=C1C(=O)c1cccc(OCc2ccc(Cl)cc2Cl)c1	6.83268	6.84466	-0.0119813	CHEMBL4481032	CHEMBL4481032	TRUE
O=c1cc(CSC(=S)N2CCCC2)c2ccc(F)cc2o1	O=c1cc(CSC(=S)N2CCCC2)c2ccc(Cl)cc2o1	4.20426	4.21624	-0.0119803	CHEMBL3395330	CHEMBL3395330	TRUE
COC(=O)c1ccc(C2C(C(C)=O)=C(O)C(=O)N2CCc2c[nH]c3ccccc23)c(F)c1	COC(=O)c1ccc(C2C(C(C)=O)=C(O)C(=O)N2CCc2c[nH]c3ccccc23)c(Cl)c1	4.4318	4.4437	-0.0118992	CHEMBL3241939	CHEMBL3241939	TRUE
O=C(O)CNC(=O)c1ncc(C2=CCN(S(=O)(=O)Cc3ccc(F)cc3)CC2)cc1O	O=C(O)CNC(=O)c1ncc(C2=CCN(S(=O)(=O)Cc3ccc(Cl)cc3)CC2)cc1O	8.19997	8.21183	-0.011861	CHEMBL5140300	CHEMBL5140300	TRUE
N=C(N)Nc1ccc(-c2cc(C(=O)Nc3ccc(F)cc3)n[nH]2)cc1	N=C(N)Nc1ccc(-c2cc(C(=O)Nc3ccc(Cl)cc3)n[nH]2)cc1	4.6103	4.62215	-0.0118451	CHEMBL3599573	CHEMBL3599573	TRUE
O=c1cc(-c2ccccc2F)c2ccc(O)cc2o1	O=c1cc(-c2ccccc2Cl)c2ccc(O)cc2o1	8.09691	8.10791	-0.0109954	CHEMBL4142948	CHEMBL4142948	TRUE
CCOC(=O)C1C(=O)NC(N)=NC1c1ccccc1F	CCOC(=O)C1C(=O)NC(N)=NC1c1ccccc1Cl	4.05041	4.06113	-0.0107153	CHEMBL3292277	CHEMBL3292277	TRUE
Cc1ccc(NC(=S)NC(=O)c2cn(-c3ccccc3)nc2-c2ccc(F)cc2)cc1	Cc1ccc(NC(=S)NC(=O)c2cn(-c3ccccc3)nc2-c2ccc(Cl)cc2)cc1	7.36653	7.37675	-0.0102192	CHEMBL2427325	CHEMBL2427325	TRUE
COc1cc2c(cc1OC)S(=O)(=O)C(CC1(F)CCN(Cc3cccc(F)c3)CC1)C2	COc1cc2c(cc1OC)S(=O)(=O)C(CC1(F)CCN(Cc3cccc(Cl)c3)CC1)C2	8.29243	8.30103	-0.00860017	CHEMBL5162941	CHEMBL5162941	TRUE
Nc1cc(CNC(=O)c2cc(NC(=O)c3cc(-c4cccc(F)n4)c(F)cc3Cl)n(-c3ccccc3)n2)ccn1	Nc1cc(CNC(=O)c2cc(NC(=O)c3cc(-c4cccc(F)n4)c(Cl)cc3Cl)n(-c3ccccc3)n2)ccn1	8.98297	8.9914	-0.00843317	CHEMBL4349462	CHEMBL4349462	TRUE
CN(C)c1ccc(C=Cc2c(F)cccc2F)nc1	CN(C)c1ccc(C=Cc2c(F)cccc2Cl)nc1	4.67572	4.68403	-0.00831211	CHEMBL3378079	CHEMBL3378079	TRUE
O=C(CS)NCCCCCCn1ccc2cc(F)c(Cl)cc21	O=C(CS)NCCCCCCn1ccc2cc(Cl)c(Cl)cc21	7.18642	7.1945	-0.00808013	CHEMBL4000026	CHEMBL4000026	TRUE
CCN1C(=O)c2cccc3c(NS(=O)(=O)Cc4ccc(F)cc4)ccc1c23	CCN1C(=O)c2cccc3c(NS(=O)(=O)Cc4ccc(Cl)cc4)ccc1c23	5.3098	5.31785	-0.008051	CHEMBL3782657	CHEMBL3782657	TRUE
O=C1CCSCC(C(=O)Nc2cc(F)cc(Cl)c2)N1	O=C1CCSCC(C(=O)Nc2cc(Cl)cc(Cl)c2)N1	6.55596	6.56384	-0.00788215	CHEMBL4737546	CHEMBL4737546	TRUE
O=C(NC(=S)Nc1ccc(F)cc1)c1cn(-c2ccccc2)nc1-c1ccc(Cl)cc1	O=C(NC(=S)Nc1ccc(Cl)cc1)c1cn(-c2ccccc2)nc1-c1ccc(Cl)cc1	7.22915	7.23657	-0.00742402	CHEMBL2427325	CHEMBL2427325	TRUE
CC(C)N1C(=O)C(NC(=O)C(Cc2ccccc2F)NC(=O)c2ccc(F)cc2C(F)(F)F)CCc2cc(F)cc(F)c21	CC(C)N1C(=O)C(NC(=O)C(Cc2ccccc2F)NC(=O)c2ccc(F)cc2C(F)(F)F)CCc2cc(Cl)cc(F)c21	6.5784	6.58503	-0.00663058	CHEMBL2396017	CHEMBL2396017	TRUE
Fc1ccc(-c2csc(NN=Cc3cc4ccccc4s3)n2)cc1	Clc1ccc(-c2csc(NN=Cc3cc4ccccc4s3)n2)cc1	3.4022	3.40882	-0.00662889	CHEMBL4409737	CHEMBL4409737	TRUE
O=C(O)C(=O)Nc1nc(Oc2cccc(F)c2)sc1C(=O)Nc1ccc2ccccc2c1	O=C(O)C(=O)Nc1nc(Oc2cccc(Cl)c2)sc1C(=O)Nc1ccc2ccccc2c1	5.25964	5.266	-0.0063634	CHEMBL4719151	CHEMBL4719151	TRUE
O=C(O)c1cc(-c2ccc(F)cc2F)cc(F)c1O	O=C(O)c1cc(-c2ccc(F)cc2F)cc(Cl)c1O	5.11919	5.12494	-0.00575233	CHEMBL3090351	CHEMBL3090351	TRUE
O=C(NNC(=S)Nc1ccc(F)cc1)c1ccccc1O	O=C(NNC(=S)Nc1ccc(Cl)cc1)c1ccccc1O	6.07572	6.08092	-0.00520119	CHEMBL4383292	CHEMBL4383292	TRUE
CC(=O)N1N=C(c2ccc(F)cc2)CC1c1ccc2c(c1)OCCCO2	CC(=O)N1N=C(c2ccc(Cl)cc2)CC1c1ccc2c(c1)OCCCO2	4.078	4.083	-0.00500002	CHEMBL2344662	CHEMBL2344662	TRUE
O=C(O)CC1CCCN(c2ccc(C(=O)NC3CCCCC3)c(OCc3cccc(F)c3)n2)C1	O=C(O)CC1CCCN(c2ccc(C(=O)NC3CCCCC3)c(OCc3cccc(Cl)c3)n2)C1	5	5.00436	-0.00436481	CHEMBL4681694	CHEMBL4681694	TRUE
COc1ccc(N(C)C(=O)C(Cc2ccccc2)NC(=O)CN2CCN(S(=O)(=O)c3ccc(F)cc3)CC2=O)cc1	COc1ccc(N(C)C(=O)C(Cc2ccccc2)NC(=O)CN2CCN(S(=O)(=O)c3ccc(Cl)cc3)CC2=O)cc1	5.97469	5.97881	-0.00411657	CHEMBL4345984	CHEMBL4345984	TRUE
CC(C)(C)OC(=O)N1CCc2c(sc3ncnc(Nc4cccc(F)c4)c23)C1	CC(C)(C)OC(=O)N1CCc2c(sc3ncnc(Nc4cccc(Cl)c4)c23)C1	5.65956	5.66354	-0.00398438	CHEMBL4341772	CHEMBL4341772	TRUE
COc1ccc(-c2nn(-c3ccccc3)cc2C=NOCc2ccccc2F)cc1	COc1ccc(-c2nn(-c3ccccc3)cc2C=NOCc2ccccc2Cl)cc1	4.69422	4.69551	-0.00129062	CHEMBL3755826	CHEMBL3755826	TRUE
COc1ncc(N2CCOCC2)cc1S(=O)(=O)Nc1ccnc(-c2cc(F)c(CN3CCN(C(C)C)CC3)cc2F)c1	COc1ncc(N2CCOCC2)cc1S(=O)(=O)Nc1ccnc(-c2cc(Cl)c(CN3CCN(C(C)C)CC3)cc2F)c1	5	5	0	CHEMBL4136596	CHEMBL4136596	TRUE
CC(C)(c1ccc(OCc2ccnc(NS(C)(=O)=O)n2)cc1)c1cc(F)c(OCCCl)c(Cl)c1	CC(C)(c1ccc(OCc2ccnc(NS(C)(=O)=O)n2)cc1)c1cc(Cl)c(OCCCl)c(Cl)c1	6.30103	6.30103	0	CHEMBL4731338	CHEMBL4731338	TRUE
Nc1n[nH]c2c1C(c1ccc(F)c(F)c1)c1c(N)n[nH]c1O2	Nc1n[nH]c2c1C(c1ccc(F)c(Cl)c1)c1c(N)n[nH]c1O2	5.52288	5.52288	0	CHEMBL3867385	CHEMBL3867385	TRUE
Cc1cnc2c(N)c(C(=O)NCCc3ccc(N4CC5CCC(C4)N5)c(F)c3)sc2n1	Cc1cnc2c(N)c(C(=O)NCCc3ccc(N4CC5CCC(C4)N5)c(Cl)c3)sc2n1	6.69897	6.69897	0	CHEMBL4136597	CHEMBL4136597	TRUE
C=CC(=O)Nc1cc(F)cc(Cl)c1Nc1ncc(OCc2c(Cl)c(OC)cc(OC)c2Cl)cn1	C=CC(=O)Nc1cc(Cl)cc(Cl)c1Nc1ncc(OCc2c(Cl)c(OC)cc(OC)c2Cl)cn1	5	5	0	CHEMBL4000066	CHEMBL4000066	TRUE
CC(Oc1ccc(Cl)cc1F)C(=O)NCc1ccc2c(c1)OCO2	CC(Oc1ccc(Cl)cc1Cl)C(=O)NCc1ccc2c(c1)OCO2	4	4	0	CHEMBL3399534	CHEMBL3399534	TRUE
Oc1ccc(-c2c(-c3ccc(F)cc3)nc3c(N4CCOCC4)nccn23)cc1	Oc1ccc(-c2c(-c3ccc(Cl)cc3)nc3c(N4CCOCC4)nccn23)cc1	5	5	0	CHEMBL4339689	CHEMBL4339689	TRUE
CC1=C(C(=O)Nc2ccc(Br)cn2)C(c2cn(-c3ccccc3)nc2-c2ccc(F)cc2)n2ncnc2N1	CC1=C(C(=O)Nc2ccc(Br)cn2)C(c2cn(-c3ccccc3)nc2-c2ccc(Cl)cc2)n2ncnc2N1	9.95861	9.95861	0	CHEMBL3737110	CHEMBL3737110	TRUE
Nc1cc(-c2ccco2)nn1-c1ccc(F)cc1	Nc1cc(-c2ccco2)nn1-c1ccc(Cl)cc1	4	4	0	CHEMBL4715099	CHEMBL4715099	TRUE
NC(=S)NNc1ncnc2c1cnn2-c1ccc(F)cc1	NC(=S)NNc1ncnc2c1cnn2-c1ccc(Cl)cc1	4	4	0	CHEMBL4342350	CHEMBL4342350	TRUE
O=[N+]([O-])CC(c1ccc(F)cc1)c1c(-c2ccccc2)[nH]c2ccccc12	O=[N+]([O-])CC(c1ccc(Cl)cc1)c1c(-c2ccccc2)[nH]c2ccccc12	5	5	0	CHEMBL4672176	CHEMBL4672176	TRUE
CCN(CC)C(=O)C(Cc1ccc(F)cc1)NC(=O)C(CC(C)C)NC(=O)C(NC(=O)C(N)COC(=O)C1CCCN1C(C)=O)C(C)C	CCN(CC)C(=O)C(Cc1ccc(Cl)cc1)NC(=O)C(CC(C)C)NC(=O)C(NC(=O)C(N)COC(=O)C1CCCN1C(C)=O)C(C)C	7	7	0	CHEMBL3404582	CHEMBL3404582	TRUE
O=C(NC1CCN(S(=O)(=O)CC2CCC(NCc3ccc(F)cn3)CC2)CC1)c1cc(C2CC2)on1	O=C(NC1CCN(S(=O)(=O)CC2CCC(NCc3ccc(Cl)cn3)CC2)CC1)c1cc(C2CC2)on1	9	9	0	CHEMBL4338950	CHEMBL4338950	TRUE
Fc1ccc(Cn2ccc3c(N4CCC(N5CCCCC5)CC4)ncnc32)cc1	Clc1ccc(Cn2ccc3c(N4CCC(N5CCCCC5)CC4)ncnc32)cc1	5	5	0	CHEMBL4342357	CHEMBL4342357	TRUE
NC(=O)c1cc(-c2ccccc2)sc1NC(=S)Nc1ccc(F)cc1	NC(=O)c1cc(-c2ccccc2)sc1NC(=S)Nc1ccc(Cl)cc1	4.60206	4.60206	0	CHEMBL3405426	CHEMBL3405426	TRUE
CC(Oc1ccc(F)cc1F)C(=O)NCc1ccc2c(c1)OCO2	CC(Oc1ccc(Cl)cc1F)C(=O)NCc1ccc2c(c1)OCO2	4	4	0	CHEMBL3399534	CHEMBL3399534	TRUE
CNC(=O)CN(Cc1cc(F)ccc1OC(F)F)C(=O)c1c[nH]c(C(=O)N2CCCC2)n1	CNC(=O)CN(Cc1cc(Cl)ccc1OC(F)F)C(=O)c1c[nH]c(C(=O)N2CCCC2)n1	5	5	0	CHEMBL4714732	CHEMBL4714732	TRUE
O=C(O)c1csc(C2CCC3C(CC(O)C3COc3ccc(F)cc3)O2)n1	O=C(O)c1csc(C2CCC3C(CC(O)C3COc3ccc(Cl)cc3)O2)n1	5	5	0	CHEMBL3808246	CHEMBL3808246	TRUE
Cc1ncc(Cn2cc(COc3ccc(F)cc3)nn2)c(N)n1	Cc1ncc(Cn2cc(COc3ccc(Cl)cc3)nn2)c(N)n1	4	4	0	CHEMBL4390730	CHEMBL4390730	TRUE
Nc1nc(N2CCC(N3Cc4cc(F)ccc4OCC3Cc3ccc(Cl)cc3)CC2)n[nH]1	Nc1nc(N2CCC(N3Cc4cc(Cl)ccc4OCC3Cc3ccc(Cl)cc3)CC2)n[nH]1	5.17393	5.17393	0	CHEMBL4619017	CHEMBL4619017	TRUE
O=C(CCc1ccc(-c2cccc(F)c2)cc1)Nc1ccccc1C(=O)O	O=C(CCc1ccc(-c2cccc(Cl)c2)cc1)Nc1ccccc1C(=O)O	9	9	0	CHEMBL3591340	CHEMBL3591340	TRUE
CNC(=O)CN(Cc1c(F)cccc1OC(F)F)C(=O)c1c[nH]c(C(=O)N2CCCC2)n1	CNC(=O)CN(Cc1c(Cl)cccc1OC(F)F)C(=O)c1c[nH]c(C(=O)N2CCCC2)n1	5	5	0	CHEMBL4714732	CHEMBL4714732	TRUE
O=C(O)c1csc(C2CCC3C(CC(O)C3COc3cccc(F)c3)O2)n1	O=C(O)c1csc(C2CCC3C(CC(O)C3COc3cccc(Cl)c3)O2)n1	5	5	0	CHEMBL3808246	CHEMBL3808246	TRUE
O=C1C(=Cc2ccccc2F)Cc2ccc(O)cc21	O=C1C(=Cc2ccccc2Cl)Cc2ccc(O)cc21	4	4	0	CHEMBL4688056	CHEMBL4688056	TRUE
CS(=O)(=O)NC(=O)c1cc(Cl)c(-n2cc(F)c3cc(-c4ccc(C(F)(F)F)cc4)cnc32)cc1F	CS(=O)(=O)NC(=O)c1cc(Cl)c(-n2cc(Cl)c3cc(-c4ccc(C(F)(F)F)cc4)cnc32)cc1F	7.30103	7.30103	0	CHEMBL4002420	CHEMBL4002420	TRUE
Cn1c(=O)c(F)cn(Cc2ccccc2OCC(=O)Nc2ccccc2Cl)c1=O	Cn1c(=O)c(Cl)cn(Cc2ccccc2OCC(=O)Nc2ccccc2Cl)c1=O	4	4	0	CHEMBL3399540	CHEMBL3399540	TRUE
CC(Oc1ccc(Cl)cc1F)C(=O)NCc1ccc2c(c1)OCO2	CC(Oc1ccc(Cl)cc1Cl)C(=O)NCc1ccc2c(c1)OCO2	4	4	0	CHEMBL3399534	CHEMBL3399534	TRUE
O=C(O)c1c(-c2ccc[nH]c2=O)c2c3occc3c(F)cc2n1Cc1cc2cn[nH]c2cc1F	O=C(O)c1c(-c2ccc[nH]c2=O)c2c3occc3c(F)cc2n1Cc1cc2cn[nH]c2cc1Cl	8.52288	8.52288	0	CHEMBL3100829	CHEMBL3100829	TRUE
CC1=C(C(=O)Nc2ccc(Br)cn2)C(c2cn(-c3ccccc3)nc2-c2ccc(F)cc2)n2ncnc2N1	CC1=C(C(=O)Nc2ccc(Br)cn2)C(c2cn(-c3ccccc3)nc2-c2ccc(Cl)cc2)n2ncnc2N1	9.95861	9.95861	0	CHEMBL3737110	CHEMBL3737110	TRUE
O=S1(=O)C=Cc2cc(-c3nnnn3-c3ccc(F)c(Cl)c3)ccc2O1	O=S1(=O)C=Cc2cc(-c3nnnn3-c3ccc(Cl)c(Cl)c3)ccc2O1	5	5	0	CHEMBL3118005	CHEMBL3118005	TRUE
O=C(Cc1cc(Br)cc(Br)c1OC(=O)c1ccc(F)cc1)Nc1ccccc1[N+](=O)[O-	O=C(Cc1cc(Br)cc(Br)c1OC(=O)c1ccc(Cl)cc1)Nc1ccccc1[N+](=O)[O-	4.30103	4.30103	0	CHEMBL3869510	CHEMBL3869510	TRUE
CCN(CC)C(=O)C(Cc1ccc(F)cc1)NC(=O)C(CC(C)C)NC(=O)C(NC(=O)C(N)COC(=O)C1CCCN1C(C)=O)C(C)C	CCN(CC)C(=O)C(Cc1ccc(Cl)cc1)NC(=O)C(CC(C)C)NC(=O)C(NC(=O)C(N)COC(=O)C1CCCN1C(C)=O)C(C)C	7	7	0	CHEMBL3404582	CHEMBL3404582	TRUE
N#Cc1ccc(S(=O)(=O)N(Cc2ccc(F)cc2)c2ccc(Oc3ccccc3)cc2)cc1	N#Cc1ccc(S(=O)(=O)N(Cc2ccc(Cl)cc2)c2ccc(Oc3ccccc3)cc2)cc1	4.52288	4.52288	0	CHEMBL4035631	CHEMBL4035631	TRUE
Cn1c(=O)c2c(nc3n2CCN(c2ccc(F)cc2)C3)n(C)c1=O	Cn1c(=O)c2c(nc3n2CCN(c2ccc(Cl)cc2)C3)n(C)c1=O	6	6	0	CHEMBL4430992	CHEMBL4430992	TRUE
O=C(Nc1ccc(F)cc1)Nc1cccc(-c2nc3cc(C(F)(F)F)ccc3s2)c1	O=C(Nc1ccc(Cl)cc1)Nc1cccc(-c2nc3cc(C(F)(F)F)ccc3s2)c1	4.60206	4.60206	0	CHEMBL4186792	CHEMBL4186792	TRUE
NC(=O)c1cc(-c2ccccc2)sc1NC(=S)Nc1ccc(F)cc1	NC(=O)c1cc(-c2ccccc2)sc1NC(=S)Nc1ccc(Cl)cc1	4.60206	4.60206	0	CHEMBL3405426	CHEMBL3405426	TRUE
CC(Oc1ccc(F)cc1F)C(=O)NCc1ccc2c(c1)OCO2	CC(Oc1ccc(Cl)cc1F)C(=O)NCc1ccc2c(c1)OCO2	4	4	0	CHEMBL3399534	CHEMBL3399534	TRUE
COc1c(NS(=O)(=O)c2ccc(F)cc2)cc2oc3cccc(OC)c3c(=O)c2c1O	COc1c(NS(=O)(=O)c2ccc(Cl)cc2)cc2oc3cccc(OC)c3c(=O)c2c1O	4.69897	4.69897	0	CHEMBL4222108	CHEMBL4222108	TRUE
Cc1nc2ccc(F)cc2cc1C1=CCCCC1	Cc1nc2ccc(Cl)cc2cc1C1=CCCCC1	4.60206	4.60206	0	CHEMBL3806500	CHEMBL3806500	TRUE
CSc1nc2ccc(F)cn2c(=N)c1S(=O)(=O)c1ccccc1	CSc1nc2ccc(Cl)cn2c(=N)c1S(=O)(=O)c1ccccc1	7.55284	7.55284	0	CHEMBL3117500	CHEMBL3117500	TRUE
O=c1n(Cc2cc(C3OC(CO)C(O)C(O)C3O)ccc2Cl)nc2ccc(F)cn12	O=c1n(Cc2cc(C3OC(CO)C(O)C(O)C3O)ccc2Cl)nc2ccc(Cl)cn12	4.04576	4.04576	0	CHEMBL3292469	CHEMBL3292469	TRUE
O=C(CCc1ccc(-c2cccc(F)c2)cc1)Nc1ccccc1C(=O)O	O=C(CCc1ccc(-c2cccc(Cl)c2)cc1)Nc1ccccc1C(=O)O	9	9	0	CHEMBL3591340	CHEMBL3591340	TRUE
CCOC(=O)NCCCC(=O)NCCc1cccc(F)c1	CCOC(=O)NCCCC(=O)NCCc1cccc(Cl)c1	6	6	0	CHEMBL4430645	CHEMBL4430645	TRUE
Cc1cc(SC(Cc2c(F)cccc2F)c2ccc(-c3cccc(C(F)(F)F)c3)cc2)ccc1OCC(=O)O	Cc1cc(SC(Cc2c(F)cccc2Cl)c2ccc(-c3cccc(C(F)(F)F)c3)cc2)ccc1OCC(=O)O	5	5	0	CHEMBL4234943	CHEMBL4234943	TRUE
CC(=O)OC1CCC2(C)C(CCC3(C)C2C(=O)C=C2C4CC(C)(C(=O)Nc5nc6c(F)cccc6s5)CCC4(C)CCC23C)C1(C)C	CC(=O)OC1CCC2(C)C(CCC3(C)C2C(=O)C=C2C4CC(C)(C(=O)Nc5nc6c(Cl)cccc6s5)CCC4(C)CCC23C)C1(C)C	4	4	0	CHEMBL4221423	CHEMBL4221423	TRUE
NCCc1ccc(OCc2ccccc2F)cc1	NCCc1ccc(OCc2ccccc2Cl)cc1	5	5	0	CHEMBL4182525	CHEMBL4182525	TRUE
Fc1ccccc1C[n+]1cccc(Cn2c3ccccc3c3ccccc32)c1	Clc1ccccc1C[n+]1cccc(Cn2c3ccccc3c3ccccc32)c1	4	4	0	CHEMBL4236741	CHEMBL4236741	TRUE
NC1=C(c2nc3ccccc3[nH]2)C(=O)CN1c1ccccc1F	NC1=C(c2nc3ccccc3[nH]2)C(=O)CN1c1ccccc1Cl	4.52288	4.52288	0	CHEMBL3782932	CHEMBL3782932	TRUE
Cn1c(=O)c(F)cn(Cc2ccccc2OCC(=O)Nc2ccccc2Cl)c1=O	Cn1c(=O)c(Cl)cn(Cc2ccccc2OCC(=O)Nc2ccccc2Cl)c1=O	4	4	0	CHEMBL3399540	CHEMBL3399540	TRUE
Fc1cc(C=Cc2ccc(N3CCN(C4=NCCO4)CC3)cc2)cc(-c2ccncc2)c1	Clc1cc(C=Cc2ccc(N3CCN(C4=NCCO4)CC3)cc2)cc(-c2ccncc2)c1	8.30103	8.30103	0	CHEMBL4124009	CHEMBL4124009	TRUE
O=S(=O)(C(F)F)N1CCN(c2ccc(C=Cc3cc(F)cc(-c4ccncc4)c3)cc2)CC1	O=S(=O)(C(F)F)N1CCN(c2ccc(C=Cc3cc(Cl)cc(-c4ccncc4)c3)cc2)CC1	8.30103	8.30103	0	CHEMBL4124009	CHEMBL4124009	TRUE
CS(=O)(=O)N1CCN(c2ccc(C=Cc3cc(F)cc(-c4ccncc4)c3)cc2)CC1	CS(=O)(=O)N1CCN(c2ccc(C=Cc3cc(Cl)cc(-c4ccncc4)c3)cc2)CC1	8.30103	8.30103	0	CHEMBL4124009	CHEMBL4124009	TRUE
CC(C)N1CCN(c2ccc(-c3n[nH]c4nc(-c5ccc(F)cc5)ccc34)cc2)CC1	CC(C)N1CCN(c2ccc(-c3n[nH]c4nc(-c5ccc(Cl)cc5)ccc34)cc2)CC1	5.69897	5.69897	0	CHEMBL4370936	CHEMBL4370936	TRUE
CCOc1cc(F)ccc1-c1ccnc(Nc2cc(C(N)=O)c(OC)cc2F)n1	CCOc1cc(Cl)ccc1-c1ccnc(Nc2cc(C(N)=O)c(OC)cc2F)n1	4.90309	4.90309	0	CHEMBL4187421	CHEMBL4187421	TRUE
COc1cc2ncnc(Nc3ccc(NC(=O)c4ccc(F)cc4)cc3)c2cc1OC	COc1cc2ncnc(Nc3ccc(NC(=O)c4ccc(Cl)cc4)cc3)c2cc1OC	5	5	0	CHEMBL4736486	CHEMBL4736486	TRUE
O=C1C(O)=C(C(c2ccc(F)cc2)c2c(O)c3ccccc3oc2=O)C(=O)c2ccccc21	O=C1C(O)=C(C(c2ccc(Cl)cc2)c2c(O)c3ccccc3oc2=O)C(=O)c2ccccc21	5	5	0	CHEMBL4001790	CHEMBL4001790	TRUE
O=S(=O)(c1ccccc1)N(CC(O)Cn1c2ccccc2c2ccccc21)c1ccc(F)cc1	O=S(=O)(c1ccccc1)N(CC(O)Cn1c2ccccc2c2ccccc21)c1ccc(Cl)cc1	5	5	0	CHEMBL4179592	CHEMBL4179592	TRUE
C#CCSc1nc(Nc2ccc(F)cc2)c(C#N)c(-c2ccccc2)n1	C#CCSc1nc(Nc2ccc(Cl)cc2)c(C#N)c(-c2ccccc2)n1	3.90309	3.90309	0	CHEMBL4036634	CHEMBL4036634	TRUE
O=C(C=Cc1ccc2c(c1)OCCCO2)NS(=O)(=O)c1ccc(F)cc1	O=C(C=Cc1ccc2c(c1)OCCCO2)NS(=O)(=O)c1ccc(Cl)cc1	4	4	0	CHEMBL4328767	CHEMBL4328767	TRUE
O=S(=O)(Nc1ccc2oc(-c3ccccc3)nc2c1)c1ccc(F)cc1	O=S(=O)(Nc1ccc2oc(-c3ccccc3)nc2c1)c1ccc(Cl)cc1	4	4	0	CHEMBL4388643	CHEMBL4388643	TRUE
CC1CCC2(C(=O)O)CCC3(C)C(=CCC4C5(C)CC(=Cc6cccc(F)c6)C(=NNC(=N)N)C(C)(C)C5CCC43C)C2C1C	CC1CCC2(C(=O)O)CCC3(C)C(=CCC4C5(C)CC(=Cc6cccc(Cl)c6)C(=NNC(=N)N)C(C)(C)C5CCC43C)C2C1C	4	4	0	CHEMBL4370605	CHEMBL4370605	TRUE
O=C1CCCN1C(c1ccccc1F)c1c(O)ccc2ccccc12	O=C1CCCN1C(c1ccccc1Cl)c1c(O)ccc2ccccc12	5.30103	5.30103	0	CHEMBL4026215	CHEMBL4026215	TRUE
CC1CCC2(C(=O)O)CCC3(C)C(=CCC4C5(C)CC(=Cc6ccccc6F)C(=NNC(=N)N)C(C)(C)C5CCC43C)C2C1C	CC1CCC2(C(=O)O)CCC3(C)C(=CCC4C5(C)CC(=Cc6ccccc6Cl)C(=NNC(=N)N)C(C)(C)C5CCC43C)C2C1C	4	4	0	CHEMBL4370605	CHEMBL4370605	TRUE
O=C(Nc1ncc(F)s1)C(CC1CCCC1)n1cc(S(=O)(=O)C2CC2)cn1	O=C(Nc1ncc(Cl)s1)C(CC1CCCC1)n1cc(S(=O)(=O)C2CC2)cn1	6.20066	6.20066	0	CHEMBL4022283	CHEMBL4022283	TRUE
CC(C)(CC(=O)NC1C2CC3CC1CC(C(N)=O)(C3)C2)NS(=O)(=O)c1cccc(Cl)c1F	CC(C)(CC(=O)NC1C2CC3CC1CC(C(N)=O)(C3)C2)NS(=O)(=O)c1cccc(Cl)c1Cl	9	9	0	CHEMBL3122300	CHEMBL3122300	TRUE
COc1cc(N2Cc3ccc(Sc4ccc(F)c(F)c4)nc3C2=O)ccc1OCCN1CCCC1	COc1cc(N2Cc3ccc(Sc4ccc(F)c(Cl)c4)nc3C2=O)ccc1OCCN1CCCC1	7.30103	7.30103	0	CHEMBL2342870	CHEMBL2342870	TRUE
O=C1c2cc(F)cc3cnn(c23)CCN1C1CN2CCC1CC2	O=C1c2cc(Cl)cc3cnn(c23)CCN1C1CN2CCC1CC2	6.74958	6.74958	0	CHEMBL3268500	CHEMBL3268500	TRUE
CCOc1nc(NC(=O)C2(NC(=O)c3ccc4c(C5CCCC5)c(-c5ccc(F)cn5)n(C)c4c3)CCCC2)ccc1C=CC(=O)O	CCOc1nc(NC(=O)C2(NC(=O)c3ccc4c(C5CCCC5)c(-c5ccc(Cl)cn5)n(C)c4c3)CCCC2)ccc1C=CC(=O)O	8.39794	8.39794	0	CHEMBL3412083	CHEMBL3412083	TRUE
O=C(O)Cc1ccc(Nc2nc(-c3ccc(F)cc3)nc3c2SCCC3)cc1	O=C(O)Cc1ccc(Nc2nc(-c3ccc(Cl)cc3)nc3c2SCCC3)cc1	6.92082	6.92082	0	CHEMBL3117338	CHEMBL3117338	TRUE
Cc1nn(-c2ccc(F)cc2)c2c1c(=O)oc1ccccc12	Cc1nn(-c2ccc(Cl)cc2)c2c1c(=O)oc1ccccc12	4.52288	4.52288	0	CHEMBL3389426	CHEMBL3389426	TRUE
COc1cc(CN2CCOC(COc3ccccc3)C2)ccc1F	COc1cc(CN2CCOC(COc3ccccc3)C2)ccc1Cl	7.37675	7.37675	0	CHEMBL3796307	CHEMBL3796307	TRUE
Fc1ccc(Nc2ncnc3c2oc2cc(-c4ccc5c(c4)OCO5)cnc23)cc1Cl	Clc1ccc(Nc2ncnc3c2oc2cc(-c4ccc5c(c4)OCO5)cnc23)cc1Cl	5	5	0	CHEMBL3095417	CHEMBL3095417	TRUE
O=C1CC(c2ccccc2)CC(O)=C1Sc1ccc(F)cc1	O=C1CC(c2ccccc2)CC(O)=C1Sc1ccc(Cl)cc1	4	4	0	CHEMBL3369984	CHEMBL3369984	TRUE
COC(=O)C12CCC(C)C(C)C1C1=CCC3C4(C)Cc5c([nH]c6ccc(F)cc56)C(C)(C)C4CCC3(C)C1(C)CC2	COC(=O)C12CCC(C)C(C)C1C1=CCC3C4(C)Cc5c([nH]c6ccc(Cl)cc56)C(C)(C)C4CCC3(C)C1(C)CC2	4	4	0	CHEMBL3380212	CHEMBL3380212	TRUE
O=C1Nc2ccc(F)cc2C1=C1Nc2ccccc2C1=O	O=C1Nc2ccc(Cl)cc2C1=C1Nc2ccccc2C1=O	5	5	0	CHEMBL3802094	CHEMBL3802094	TRUE
CC(=O)Nc1ccccc1OCC(O)CN1CCC2(CC1)Cc1cc(F)ccc1O2	CC(=O)Nc1ccccc1OCC(O)CN1CCC2(CC1)Cc1cc(Cl)ccc1O2	9.01773	9.01773	0	CHEMBL2340879	CHEMBL2340879	TRUE
C#CCn1c(=O)c(C=O)cc2cc(F)ccc21	C#CCn1c(=O)c(C=O)cc2cc(Cl)ccc21	4	4	0	CHEMBL3611682	CHEMBL3611682	TRUE
O=C1NCCc2nc(C#Cc3cccc(F)c3)sc21	O=C1NCCc2nc(C#Cc3cccc(Cl)c3)sc21	5	5	0	CHEMBL2405252	CHEMBL2405252	TRUE
O=C(Nc1ccc2c(c1)N(S(=O)(=O)c1ccc(F)cc1)CCC2)c1c(F)cccc1F	O=C(Nc1ccc2c(c1)N(S(=O)(=O)c1ccc(F)cc1)CCC2)c1c(F)cccc1Cl	4.69897	4.69897	0	CHEMBL3620064	CHEMBL3620064	TRUE
CC(C)(CC(=O)NC1C2CC3CC1CC(C(N)=O)(C3)C2)NS(=O)(=O)c1cccc(F)c1F	CC(C)(CC(=O)NC1C2CC3CC1CC(C(N)=O)(C3)C2)NS(=O)(=O)c1cccc(Cl)c1F	9	9	0	CHEMBL3122300	CHEMBL3122300	TRUE
O=C1CC(c2ccccc2)CC(O)=C1Sc1cccc(F)c1	O=C1CC(c2ccccc2)CC(O)=C1Sc1cccc(Cl)c1	4	4	0	CHEMBL3369984	CHEMBL3369984	TRUE
O=C(O)C(=O)CC(=O)c1ccc2ccc3c(F)cccc3c2c1	O=C(O)C(=O)CC(=O)c1ccc2ccc3c(Cl)cccc3c2c1	4.95861	4.95861	0	CHEMBL2446201	CHEMBL2446201	TRUE
CC12CCC3C(CCC4=CC(=O)C(F)CC43C)C1CCC2=O	CC12CCC3C(CCC4=CC(=O)C(Cl)CC43C)C1CCC2=O	7.34679	7.34679	0	CHEMBL3755858	CHEMBL3755858	TRUE
CCC(C)C(N)C(=O)N1CCC(F)C1	CCC(C)C(N)C(=O)N1CCC(Cl)C1	5	5	0	CHEMBL4132756	CHEMBL4132756	TRUE
COc1ccc(C2=NCCN2c2ccc(S(C)(=O)=O)cc2)cc1F	COc1ccc(C2=NCCN2c2ccc(S(C)(=O)=O)cc2)cc1Cl	5	5	0	CHEMBL3365665	CHEMBL3365665	TRUE
O=C(Cc1ccc(O)c(F)c1)NN=C1C(=O)Nc2c(Cl)ccc(Cl)c21	O=C(Cc1ccc(O)c(Cl)c1)NN=C1C(=O)Nc2c(Cl)ccc(Cl)c21	8.04576	8.04576	0	CHEMBL3866470	CHEMBL3866470	TRUE
CC12CCC3c4cc(F)c(O)cc4CCC3C1CCC2=O	CC12CCC3c4cc(Cl)c(O)cc4CCC3C1CCC2=O	7	7	0	CHEMBL3755859	CHEMBL3755859	TRUE
CC12CCC3c4cc(F)c(O)cc4CCC3C1CCC2O	CC12CCC3c4cc(Cl)c(O)cc4CCC3C1CCC2O	7	7	0	CHEMBL3755859	CHEMBL3755859	TRUE
COc1cc2occc2c(OC)c1-c1cc(-c2ccc(F)cc2)n(-c2ccc(S(N)(=O)=O)cc2)n1	COc1cc2occc2c(OC)c1-c1cc(-c2ccc(Cl)cc2)n(-c2ccc(S(N)(=O)=O)cc2)n1	4.30103	4.30103	0	CHEMBL3128456	CHEMBL3128456	TRUE
COc1ccc(Cc2cc(-c3ccc(F)cc3)nn(CC(=O)Nc3ccc(Br)cc3)c2=O)cc1	COc1ccc(Cc2cc(-c3ccc(Cl)cc3)nn(CC(=O)Nc3ccc(Br)cc3)c2=O)cc1	4.30103	4.30103	0	CHEMBL2393754	CHEMBL2393754	TRUE
COc1cccc(Cc2cc(-c3ccc(F)cc3)nn(CC(=O)Nc3ccc(F)cc3)c2=O)c1	COc1cccc(Cc2cc(-c3ccc(Cl)cc3)nn(CC(=O)Nc3ccc(F)cc3)c2=O)c1	4.30103	4.30103	0	CHEMBL2393754	CHEMBL2393754	TRUE
COc1cccc(Cc2cc(-c3ccc(F)cc3)nn(CC(=O)Nc3ccc4c(c3)OCO4)c2=O)c1	COc1cccc(Cc2cc(-c3ccc(Cl)cc3)nn(CC(=O)Nc3ccc4c(c3)OCO4)c2=O)c1	4.30103	4.30103	0	CHEMBL2393754	CHEMBL2393754	TRUE
Oc1ccc(Nc2nc(-c3ccc(F)cc3)cs2)cc1	Oc1ccc(Nc2nc(-c3ccc(Cl)cc3)cs2)cc1	6.1549	6.1549	0	CHEMBL3365101	CHEMBL3365101	TRUE
Fc1ccc(-c2nn(-c3ccccc3)cc2-c2nnc(-c3ccc(Cl)cc3)o2)cc1	Clc1ccc(-c2nnc(-c3cn(-c4ccccc4)nc3-c3ccc(Cl)cc3)o2)cc1	4	4	0	CHEMBL3268341	CHEMBL3268341	TRUE
O=C1SC(=Cc2ccc3c(c2)OCO3)C(=O)N1Cc1cn(-c2ccc(F)c(F)c2)nn1	O=C1SC(=Cc2ccc3c(c2)OCO3)C(=O)N1Cc1cn(-c2ccc(Cl)c(F)c2)nn1	7	7	0	CHEMBL3089764	CHEMBL3089764	TRUE
O=C(C=Cc1coc2cccc(OCC3CCCCC3)c2c1=O)c1ccc(F)cc1	O=C(C=Cc1coc2cccc(OCC3CCCCC3)c2c1=O)c1ccc(Cl)cc1	4.52288	4.52288	0	CHEMBL2321339	CHEMBL2321339	TRUE
O=C(c1ccc(F)cc1)N1CCN(C(c2ccccc2)c2ccccc2)CC1	O=C(c1ccc(Cl)cc1)N1CCN(C(c2ccccc2)c2ccccc2)CC1	4.30103	4.30103	0	CHEMBL3395431	CHEMBL3395431	TRUE
NC(=O)c1cccc2c(NC(CN3CCC3)c3ccc(F)c(C(F)(F)F)c3)nnnc12	NC(=O)c1cccc2c(NC(CN3CCC3)c3ccc(Cl)c(C(F)(F)F)c3)nnnc12	7.60206	7.60206	0	CHEMBL4229645	CHEMBL4229645	TRUE
CC1CN(c2ccc(S(C)(=O)=O)cc2)C(c2ccc(F)cc2)=N1	CC1CN(c2ccc(S(C)(=O)=O)cc2)C(c2ccc(Cl)cc2)=N1	5	5	0	CHEMBL3365665	CHEMBL3365665	TRUE
CC1CN(c2ccc(S(N)(=O)=O)cc2)C(c2ccc(F)cc2)=N1	CC1CN(c2ccc(S(N)(=O)=O)cc2)C(c2ccc(Cl)cc2)=N1	5	5	0	CHEMBL3365665	CHEMBL3365665	TRUE
O=C(c1ccc(Br)cc1)N1N=C(c2ccc(F)cc2)CC1c1ccc2c(c1)OCO2	O=C(c1ccc(Br)cc1)N1N=C(c2ccc(Cl)cc2)CC1c1ccc2c(c1)OCO2	4.39794	4.39794	0	CHEMBL3428203	CHEMBL3428203	TRUE
Cc1c(C#N)c(=O)oc2cc(OCc3ccc(F)cc3)ccc12	Cc1c(C#N)c(=O)oc2cc(OCc3ccc(Cl)cc3)ccc12	4	4	0	CHEMBL4042093	CHEMBL4042093	TRUE
CN(Cc1nc2cc(C(F)(F)F)ccc2nc1-c1ccccc1)c1ccc(F)cc1	CN(Cc1nc2cc(C(F)(F)F)ccc2nc1-c1ccccc1)c1ccc(Cl)cc1	5.30103	5.30103	0	CHEMBL3122687	CHEMBL3122687	TRUE
CCN(Cc1nc2cc(C(F)(F)F)ccc2nc1-c1ccccc1)c1ccc(F)cc1	CCN(Cc1nc2cc(C(F)(F)F)ccc2nc1-c1ccccc1)c1ccc(Cl)cc1	5.52288	5.52288	0	CHEMBL3122687	CHEMBL3122687	TRUE
Cc1cc(Nc2ccc(F)cc2)n2nc(SCc3nc4ccccc4[nH]3)nc2n1	Cc1cc(Nc2ccc(Cl)cc2)n2nc(SCc3nc4ccccc4[nH]3)nc2n1	5	5	0	CHEMBL4042261	CHEMBL4042261	TRUE
COc1ccc2c(c1)oc1c(Nc3ccc(F)c(Cl)c3)ncnc12	COc1ccc2c(c1)oc1c(Nc3ccc(Cl)c(Cl)c3)ncnc12	5	5	0	CHEMBL2320288	CHEMBL2320288	TRUE
O=C1C(=O)N(CCN2CCN(NCc3ccccc3)CC2)c2ccc(F)cc21	O=C1C(=O)N(CCN2CCN(NCc3ccccc3)CC2)c2ccc(Cl)cc21	4.30103	4.30103	0	CHEMBL3875318	CHEMBL3875318	TRUE
COc1ccccc1CNN1CCN(CCN2C(=O)C(=O)c3cc(F)ccc32)CC1	COc1ccccc1CNN1CCN(CCN2C(=O)C(=O)c3cc(Cl)ccc32)CC1	4.30103	4.30103	0	CHEMBL3875318	CHEMBL3875318	TRUE
NC(=O)c1cc(-c2cn3cc(F)ccc3n2)ccc1O	NC(=O)c1cc(-c2cn3cc(Cl)ccc3n2)ccc1O	5.85387	5.85387	0	CHEMBL3870427	CHEMBL3870427	TRUE
CC#CCn1c(N2CCCC(N)C2)cc(=O)n(Cc2ccc3cc(F)ccc3n2)c1=O	CC#CCn1c(N2CCCC(N)C2)cc(=O)n(Cc2ccc3cc(Cl)ccc3n2)c1=O	4	4	0	CHEMBL2429188	CHEMBL2429188	TRUE
CCOC(=O)c1cc(C(=O)c2cccc(F)c2)n2ccc(C(=O)NC3CN4CCC3CC4)cc12	CCOC(=O)c1cc(C(=O)c2cccc(Cl)c2)n2ccc(C(=O)NC3CN4CCC3CC4)cc12	4.69897	4.69897	0	CHEMBL3788097	CHEMBL3788097	TRUE
COCCCOc1cc(CC(CC(N)C(O)CC(C(=O)NCC(C)(C)Cc2cccc(F)c2)C(C)C)C(C)C)ccc1OC	COCCCOc1cc(CC(CC(N)C(O)CC(C(=O)NCC(C)(C)Cc2cccc(Cl)c2)C(C)C)C(C)C)ccc1OC	8.00877	8.00877	0	CHEMBL3637515	CHEMBL3637515	TRUE
Cc1cc(Cc2cccc(F)c2)c(=O)n(CC(=O)Nc2ccc(Br)cc2)n1	Cc1cc(Cc2cccc(Cl)c2)c(=O)n(CC(=O)Nc2ccc(Br)cc2)n1	4.30103	4.30103	0	CHEMBL2393754	CHEMBL2393754	TRUE
O=C1COC(c2ccc(N=Nc3cccc(F)c3)cc2)=NN1	O=C1COC(c2ccc(N=Nc3cccc(Cl)c3)cc2)=NN1	4	4	0	CHEMBL4011738	CHEMBL4011738	TRUE
Fc1ccccc1-c1nc2ccc(Nc3ccnc4ccccc34)cc2[nH]1	Clc1ccccc1-c1nc2ccc(Nc3ccnc4ccccc34)cc2[nH]1	5	5	0	CHEMBL3373860	CHEMBL3373860	TRUE
Nc1c2c(nc3c1C(c1ccccc1F)n1c(=O)c4ccccc4c(=O)n1-3)CCCC2	Nc1c2c(nc3c1C(c1ccccc1Cl)n1c(=O)c4ccccc4c(=O)n1-3)CCCC2	4	4	0	CHEMBL4193645	CHEMBL4193645	TRUE
O=C1CC(c2ccccc2)Sc2ccccc2N1Cc1ccccc1F	O=C1CC(c2ccccc2)Sc2ccccc2N1Cc1ccccc1Cl	4	4	0	CHEMBL2338935	CHEMBL2338935	TRUE
CCOC(=O)c1sc(Nc2ccc(C)c(F)c2)nc1-c1ccccc1	CCOC(=O)c1sc(Nc2ccc(C)c(Cl)c2)nc1-c1ccccc1	5	5	0	CHEMBL3413104	CHEMBL3413104	TRUE
CCOC(=O)c1sc(Nc2ccc(C)c(F)c2)nc1C1CC1	CCOC(=O)c1sc(Nc2ccc(C)c(Cl)c2)nc1C1CC1	5	5	0	CHEMBL3413104	CHEMBL3413104	TRUE
O=C(O)C1CN(Cc2ccc(OCc3cccc(C(F)(F)F)c3)cc2F)C1	O=C(O)C1CN(Cc2ccc(OCc3cccc(C(F)(F)F)c3)cc2Cl)C1	8.69897	8.69897	0	CHEMBL3744618	CHEMBL3744618	TRUE
C#CCSc1nc(Nc2ccc(F)cc2)c(C#N)c(-c2ccccc2)n1	C#CCSc1nc(Nc2ccc(Cl)cc2)c(C#N)c(-c2ccccc2)n1	3.90309	3.90309	0	CHEMBL3420662	CHEMBL3420662	TRUE
O=C(O)c1cc(F)ccc1O	O=C(O)c1cc(Cl)ccc1O	2	2	0	CHEMBL3620069	CHEMBL3620069	TRUE
O=C(NCc1ccncc1)c1ccc(Oc2ccc(F)cc2)cc1	O=C(NCc1ccncc1)c1ccc(Oc2ccc(Cl)cc2)cc1	5	5	0	CHEMBL3396504	CHEMBL3396504	TRUE
COc1cc(Sc2c(-c3ccccc3)[nH]c3ccc(F)cc23)cc(OC)c1OC	COc1cc(Sc2c(-c3ccccc3)[nH]c3ccc(Cl)cc23)cc(OC)c1OC	5.82391	5.82391	0	CHEMBL3599631	CHEMBL3599631	TRUE
O=c1cc(-c2ccnc(NC3CCOCC3)n2)ccn1C(CO)c1cccc(F)c1	O=c1cc(-c2ccnc(NC3CCOCC3)n2)ccn1C(CO)c1cccc(Cl)c1	8.88606	8.88606	0	CHEMBL3412886	CHEMBL3412886	TRUE
CCOP(=O)(OCC)C(O)C(CC1CCNC1=O)NC(=O)C(CC1CCCCC1)NC(=O)OCc1ccccc1F	CCOP(=O)(OCC)C(O)C(CC1CCNC1=O)NC(=O)C(CC1CCCCC1)NC(=O)OCc1ccccc1Cl	5	5	0	CHEMBL3429731	CHEMBL3429731	TRUE
O=C(O)c1cncc(F)c1	O=C(O)c1cncc(Cl)c1	2	2	0	CHEMBL3620069	CHEMBL3620069	TRUE
O=S(=O)(Nc1ccc(O)c(F)c1)c1ccc(-c2ccccc2)cc1	O=S(=O)(Nc1ccc(O)c(Cl)c1)c1ccc(-c2ccccc2)cc1	4.69897	4.69897	0	CHEMBL3387788	CHEMBL3387788	TRUE
OC(CCCN1CCC(C(O)(c2ccccc2)c2ccccc2)CC1)c1ccc(F)cc1	OC(CCCN1CCC(C(O)(c2ccccc2)c2ccccc2)CC1)c1ccc(Cl)cc1	3.47756	3.47756	0	CHEMBL3389999	CHEMBL3389999	TRUE
O=S(=O)(Nc1nccs1)c1ccc(NCc2cc(F)ccc2O)cc1	O=S(=O)(Nc1nccs1)c1ccc(NCc2cc(Cl)ccc2O)cc1	4.39794	4.39794	0	CHEMBL3116602	CHEMBL3116602	TRUE
COc1cc(S(=O)(=O)n2c(C)nc3ccccc32)ccc1F	COc1cc(S(=O)(=O)n2c(C)nc3ccccc32)ccc1Cl	6.04576	6.04576	0	CHEMBL3118331	CHEMBL3118331	TRUE
Oc1ccc2ccc(-c3cccnc3)c(F)c2c1	Oc1ccc2ccc(-c3cccnc3)c(Cl)c2c1	5.69897	5.69897	0	CHEMBL2421738	CHEMBL2421738	TRUE
COc1c(C=Cc2ccc(NS(C)(=O)=O)cc2)cc(-c2cc(F)c[nH]c2=O)cc1C(C)(C)C	COc1c(C=Cc2ccc(NS(C)(=O)=O)cc2)cc(-c2cc(Cl)c[nH]c2=O)cc1C(C)(C)C	9	9	0	CHEMBL2434103	CHEMBL2434103	TRUE
COc1cc(Sc2c(-c3ccc(F)cc3)[nH]c3ccccc23)cc(OC)c1OC	COc1cc(Sc2c(-c3ccc(Cl)cc3)[nH]c3ccccc23)cc(OC)c1OC	5.74473	5.74473	0	CHEMBL2321170	CHEMBL2321170	TRUE
O=C(O)CCC(=O)N1N=C(c2c(-c3ccc(F)cc3)c3ccccc3[nH]c2=O)CC1c1ccc(Cl)cc1	O=C(O)CCC(=O)N1N=C(c2c(-c3ccc(Cl)cc3)c3ccccc3[nH]c2=O)CC1c1ccc(Cl)cc1	4.67778	4.67778	0	CHEMBL2427899	CHEMBL2427899	TRUE
O=C(C=C1NCC2c3ccccc3CCN2C1=O)c1ccc(F)cc1	O=C(C=C1NCC2c3ccccc3CCN2C1=O)c1ccc(Cl)cc1	4	4	0	CHEMBL2432556	CHEMBL2432556	TRUE
O=C(Nc1sc2c(c1C(=O)Nc1ccccn1)CCCCC2)c1ccc(F)cc1Cl	O=C(Nc1sc2c(c1C(=O)Nc1ccccn1)CCCCC2)c1ccc(Cl)cc1Cl	3.69897	3.69897	0	CHEMBL3110996	CHEMBL3110996	TRUE
O=C(Nc1sc2c(c1C(=O)O)CCCCC2)c1ccc(F)cc1	O=C(Nc1sc2c(c1C(=O)O)CCCCC2)c1ccc(Cl)cc1	3.69897	3.69897	0	CHEMBL3110996	CHEMBL3110996	TRUE
CCOC(=O)c1c(NC(=O)c2ccc(F)cc2)sc2c1CCCCC2	CCOC(=O)c1c(NC(=O)c2ccc(Cl)cc2)sc2c1CCCCC2	3.69897	3.69897	0	CHEMBL3110996	CHEMBL3110996	TRUE
C=CCNc1nc(N)c(C(=O)c2ccc(F)cc2)s1	C=CCNc1nc(N)c(C(=O)c2ccc(Cl)cc2)s1	4	4	0	CHEMBL2380185	CHEMBL2380185	TRUE
NS(=O)(=O)c1ccc(CNC(=O)Cc2ccc(F)cc2)cc1	NS(=O)(=O)c1ccc(CNC(=O)Cc2ccc(Cl)cc2)cc1	6.96257	6.96257	0	CHEMBL2406031	CHEMBL2406031	TRUE
O=C(Cc1ccc(F)cc1)Nc1sc2c(c1C(=O)Nc1ccccn1)CCCCC2	O=C(Cc1ccc(Cl)cc1)Nc1sc2c(c1C(=O)Nc1ccccn1)CCCCC2	3.69897	3.69897	0	CHEMBL3110996	CHEMBL3110996	TRUE
O=C(CCc1ccc(F)cc1)Nc1sc2c(c1C(=O)Nc1ccccn1)CCCCC2	O=C(CCc1ccc(Cl)cc1)Nc1sc2c(c1C(=O)Nc1ccccn1)CCCCC2	3.69897	3.69897	0	CHEMBL3110996	CHEMBL3110996	TRUE
CCCCC(NC(=O)C(CCCCN)NC(=O)C(CCCNC(=N)N)NC(=O)c1ccc(C=C2SC(=S)N(Cc3ccc(F)cc3)C2=O)cc1)C(N)=O	CCCCC(NC(=O)C(CCCCN)NC(=O)C(CCCNC(=N)N)NC(=O)c1ccc(C=C2SC(=S)N(Cc3ccc(Cl)cc3)C2=O)cc1)C(N)=O	5	5	0	CHEMBL2447443	CHEMBL2447443	TRUE
O=C(C=Cc1cn(Cc2ccc(F)cc2)c2ccccc12)CC(=O)C(=O)O	O=C(C=Cc1cn(Cc2ccc(Cl)cc2)c2ccccc12)CC(=O)C(=O)O	4.39794	4.39794	0	CHEMBL2445054	CHEMBL2445054	TRUE
CCOC(=O)C(=O)CC(=O)C=Cc1cn(Cc2ccc(F)cc2)c2ccccc12	CCOC(=O)C(=O)CC(=O)C=Cc1cn(Cc2ccc(Cl)cc2)c2ccccc12	4.39794	4.39794	0	CHEMBL2445054	CHEMBL2445054	TRUE
Fc1ccc(Cn2cc(CSC(=S)N3CCCCC3)nn2)cc1	S=C(SCc1cn(Cc2ccc(Cl)cc2)nn1)N1CCCCC1	3.90309	3.90309	0	CHEMBL2443630	CHEMBL2443630	TRUE
Fc1ccc(Cn2cc(CSC(=S)N3CCOCC3)nn2)cc1	S=C(SCc1cn(Cc2ccc(Cl)cc2)nn1)N1CCOCC1	3.90309	3.90309	0	CHEMBL2443630	CHEMBL2443630	TRUE
COc1ccc2c(c1)C1CNC(=CC(=O)c3cccc(F)c3)C(=O)N1CC2	COc1ccc2c(c1)C1CNC(=CC(=O)c3cccc(Cl)c3)C(=O)N1CC2	4	4	0	CHEMBL2432556	CHEMBL2432556	TRUE
O=C(C=C1NCC2c3ccccc3CCN2C1=O)c1cccc(F)c1	O=C(C=C1NCC2c3ccccc3CCN2C1=O)c1cccc(Cl)c1	4	4	0	CHEMBL2432556	CHEMBL2432556	TRUE
CNC(=O)C=C1COc2cc(OS(=O)(=O)c3cccc(F)c3)ccc21	CNC(=O)C=C1COc2cc(OS(=O)(=O)c3cccc(Cl)c3)ccc21	7.38722	7.38722	0	CHEMBL2329971	CHEMBL2329971	TRUE
O=C(C=C1NCC2c3ccccc3CCN2C1=O)c1ccccc1F	O=C(C=C1NCC2c3ccccc3CCN2C1=O)c1ccccc1Cl	4	4	0	CHEMBL2432556	CHEMBL2432556	TRUE
O=C(Nc1sc2c(c1C(=O)O)CCCCC2)c1ccccc1F	O=C(Nc1sc2c(c1C(=O)O)CCCCC2)c1ccccc1Cl	3.69897	3.69897	0	CHEMBL3110996	CHEMBL3110996	TRUE
CCOC(=O)c1c(NC(=O)c2ccccc2F)sc2c1CCCCC2	CCOC(=O)c1c(NC(=O)c2ccccc2Cl)sc2c1CCCCC2	3.69897	3.69897	0	CHEMBL3110996	CHEMBL3110996	TRUE
CN1CCN(C(=S)SCc2cn(Cc3ccccc3F)nn2)CC1	CN1CCN(C(=S)SCc2cn(Cc3ccccc3Cl)nn2)CC1	3.90309	3.90309	0	CHEMBL2443630	CHEMBL2443630	TRUE
Cc1ccc(NC(=O)C(Cc2ccccc2)NC2=CC(=O)c3ccccc3C2=O)cc1F	Cc1ccc(NC(=O)C(Cc2ccccc2)NC2=CC(=O)c3ccccc3C2=O)cc1Cl	4.69897	4.69897	0	CHEMBL4381958	CHEMBL4381958	TRUE
C=CC(=O)N1CCN(c2nc(=O)n(-c3c(C)ncnc3C(C)C)c3nc(-c4c(O)cccc4F)c(F)cc23)C(C)C1	C=CC(=O)N1CCN(c2nc(=O)n(-c3c(C)ncnc3C(C)C)c3nc(-c4c(O)cccc4F)c(Cl)cc23)C(C)C1	4.30103	4.30103	0	CHEMBL4357261	CHEMBL4357261	TRUE
Oc1cc2c(cc1C(c1ccc(F)cc1)N1CCOCC1)OCO2	Oc1cc2c(cc1C(c1ccc(Cl)cc1)N1CCOCC1)OCO2	4.52288	4.52288	0	CHEMBL4729814	CHEMBL4729814	TRUE
NC(CC(=O)O)Cn1nnc(-c2ccc(Oc3ccc(F)cc3)cc2)n1	NC(CC(=O)O)Cn1nnc(-c2ccc(Oc3ccc(Cl)cc3)cc2)n1	8.52288	8.52288	0	CHEMBL4834652	CHEMBL4834652	TRUE
O=C1C=C(NC(Cc2ccccc2)C(=O)Nc2cccc(F)c2)C(=O)c2ccccc21	O=C1C=C(NC(Cc2ccccc2)C(=O)Nc2cccc(Cl)c2)C(=O)c2ccccc21	4.69897	4.69897	0	CHEMBL4381955	CHEMBL4381955	TRUE
Cc1cc(O)c(C(=O)N2CCC3(CCC3)C2)c(F)c1	Cc1cc(O)c(C(=O)N2CCC3(CCC3)C2)c(Cl)c1	5	5	0	CHEMBL4360952	CHEMBL4360952	TRUE
O=C(NCc1cc(F)cc(Cl)c1)C1(O)CCN(c2ccccc2)C1=O	O=C(NCc1cc(Cl)cc(Cl)c1)C1(O)CCN(c2ccccc2)C1=O	7.22185	7.22185	0	CHEMBL4397057	CHEMBL4397057	TRUE
COc1ccccc1Cc1cc(C)nn(CC(=O)Nc2ccc(Cl)cc2F)c1=O	COc1ccccc1Cc1cc(C)nn(CC(=O)Nc2ccc(Cl)cc2Cl)c1=O	4	4	0	CHEMBL4352683	CHEMBL4352683	TRUE
O=S(=O)(C=Cc1ccc(F)cc1)c1ccc(OCCCN2CCOCC2)cc1	O=S(=O)(C=Cc1ccc(Cl)cc1)c1ccc(OCCCN2CCOCC2)cc1	5	5	0	CHEMBL4331808	CHEMBL4331808	TRUE
CC(C)Oc1cnc2c(c1Cc1ccc(F)cc1)c(=O)n(CCCO)c(=O)n2C	CC(C)Oc1cnc2c(c1Cc1ccc(Cl)cc1)c(=O)n(CCCO)c(=O)n2C	7.85387	7.85387	0	CHEMBL4377078	CHEMBL4377078	TRUE
Cc1c(-c2cccc(F)c2)sc2c1c(=O)n(CCCO)c(=O)n2C	Cc1c(-c2cccc(Cl)c2)sc2c1c(=O)n(CCCO)c(=O)n2C	7.67778	7.67778	0	CHEMBL4377078	CHEMBL4377078	TRUE
O=S(=O)(C=Cc1cccc(F)c1)c1ccc(OCCCN2CCOCC2)cc1	O=S(=O)(C=Cc1cccc(Cl)c1)c1ccc(OCCCN2CCOCC2)cc1	5	5	0	CHEMBL4331808	CHEMBL4331808	TRUE
COc1cccc(Cc2cc(C)nn(C(C)C(=O)Nc3ccccc3F)c2=O)c1	COc1cccc(Cc2cc(C)nn(C(C)C(=O)Nc3ccccc3Cl)c2=O)c1	4	4	0	CHEMBL4352683	CHEMBL4352683	TRUE
O=C(CCCCCCn1cc(Nc2ncc(F)c(Nc3ccc(F)cc3)n2)cn1)NO	O=C(CCCCCCn1cc(Nc2ncc(Cl)c(Nc3ccc(F)cc3)n2)cn1)NO	8.52288	8.52288	0	CHEMBL4347598	CHEMBL4347598	TRUE
Cn1c(=O)n(CCCO)c(=O)c2c(Cc3ccc(Cl)cc3)c(Oc3cncc(F)c3)cnc21	Cn1c(=O)n(CCCO)c(=O)c2c(Cc3ccc(Cl)cc3)c(Oc3cncc(Cl)c3)cnc21	7.85387	7.85387	0	CHEMBL4377078	CHEMBL4377078	TRUE
CC1(c2cc(NC(=O)c3ncc(C#N)cc3F)ccc2F)N=C(N)COC1F	CC1(c2cc(NC(=O)c3ncc(C#N)cc3Cl)ccc2F)N=C(N)COC1F	5	5	0	CHEMBL4137009	CHEMBL4137009	TRUE
Cc1cc(Nc2cc(F)cc(F)c2)nc(N)n1	Cc1cc(Nc2cc(F)cc(Cl)c2)nc(N)n1	3.74473	3.74473	0	CHEMBL4037228	CHEMBL4037228	TRUE
CCOC(=O)C1=C(CN2CCOCC2C(=O)O)NC(c2nccs2)=NC1c1ccc(F)cc1Cl	CCOC(=O)C1=C(CN2CCOCC2C(=O)O)NC(c2nccs2)=NC1c1ccc(Cl)cc1Cl	4.52288	4.52288	0	CHEMBL4028623	CHEMBL4028623	TRUE
CN1C(=O)C(CCCNC(=N)N)NC(=O)C(Cc2ccc(F)cc2)NC(=O)C2CCCN2C(=O)C(Cc2ccc3ccccc3c2)NC(=O)C1CCCNC(N)=O	CN1C(=O)C(CCCNC(=N)N)NC(=O)C(Cc2ccc(Cl)cc2)NC(=O)C2CCCN2C(=O)C(Cc2ccc3ccccc3c2)NC(=O)C1CCCNC(N)=O	4.52288	4.52288	0	CHEMBL4049245	CHEMBL4049245	TRUE
O=C1CCC(N2Cc3cc(CNC(=O)Nc4ccc(F)cc4)ccc3C2=O)C(=O)N1	O=C1CCC(N2Cc3cc(CNC(=O)Nc4ccc(Cl)cc4)ccc3C2=O)C(=O)N1	8.52288	8.52288	0	CHEMBL4219355	CHEMBL4219355	TRUE
O=C(O)CNC(=O)c1ncc(-c2cccc(F)c2)cc1O	O=C(O)CNC(=O)c1ncc(-c2cccc(Cl)c2)cc1O	4.86328	4.86328	0	CHEMBL4149388	CHEMBL4149388	TRUE
CN(CC=Cc1cccc(F)c1)Cc1cccc2cc[nH]c12	CN(CC=Cc1cccc(Cl)c1)Cc1cccc2cc[nH]c12	6	6	0	CHEMBL4027654	CHEMBL4027654	TRUE
CN(CC=Cc1cccc(F)c1)Cc1coc2ccccc12	CN(CC=Cc1cccc(Cl)c1)Cc1coc2ccccc12	6	6	0	CHEMBL4027654	CHEMBL4027654	TRUE
Cc1cc(Nc2cccc(F)c2)nc(N)n1	Cc1cc(Nc2cccc(Cl)c2)nc(N)n1	3.74473	3.74473	0	CHEMBL4037228	CHEMBL4037228	TRUE
CN(CC=Cc1ccccc1F)Cc1cccc2cc[nH]c12	CN(CC=Cc1ccccc1Cl)Cc1cccc2cc[nH]c12	6	6	0	CHEMBL4027654	CHEMBL4027654	TRUE
COc1cc2nccc(Oc3ccc(NS(=O)(=O)c4ccccc4F)c(F)c3)c2cc1OC	COc1cc2nccc(Oc3ccc(NS(=O)(=O)c4ccccc4Cl)c(F)c3)c2cc1OC	6	6	0	CHEMBL4371349	CHEMBL4371349	TRUE
Cc1ccoc1C(=O)N1CCCn2nc(C(=O)Nc3ccc(F)cc3F)cc2C1	Cc1ccoc1C(=O)N1CCCn2nc(C(=O)Nc3ccc(F)cc3Cl)cc2C1	7.22185	7.22185	0	CHEMBL4010104	CHEMBL4010104	TRUE
Nc1ccccc1NC(=O)c1ccc(NC(=O)NCc2ccc(F)nc2)cc1	Nc1ccccc1NC(=O)c1ccc(NC(=O)NCc2ccc(Cl)nc2)cc1	5.69897	5.69897	0	CHEMBL4019742	CHEMBL4019742	TRUE
Cc1c(-c2ccc(N3CCCCC3)cc2)[nH]c2cc(F)ccc2c1=O	Cc1c(-c2ccc(N3CCCCC3)cc2)[nH]c2cc(Cl)ccc2c1=O	5	5	0	CHEMBL4050695	CHEMBL4050695	TRUE
COc1cnc2c(c1)C(=O)c1c-2n(CCCN2CCC(O)CC2)c(=O)c2cc(F)ccc12	COc1cnc2c(c1)C(=O)c1c-2n(CCCN2CCC(O)CC2)c(=O)c2cc(Cl)ccc12	3.95468	3.95468	0	CHEMBL4040007	CHEMBL4040007	TRUE
COc1cnc2c(c1)C(=O)c1c-2n(CCCN2CCCC2)c(=O)c2cc(F)ccc12	COc1cnc2c(c1)C(=O)c1c-2n(CCCN2CCCC2)c(=O)c2cc(Cl)ccc12	3.95468	3.95468	0	CHEMBL4040007	CHEMBL4040007	TRUE
COc1cnc2c(c1)C(=O)c1c-2n(CCCN2CCOCC2)c(=O)c2cc(F)ccc12	COc1cnc2c(c1)C(=O)c1c-2n(CCCN2CCOCC2)c(=O)c2cc(Cl)ccc12	3.95468	3.95468	0	CHEMBL4040007	CHEMBL4040007	TRUE
COc1cnc2c(c1)C(=O)c1c-2n(CCCNC(C)C)c(=O)c2cc(F)ccc12	COc1cnc2c(c1)C(=O)c1c-2n(CCCNC(C)C)c(=O)c2cc(Cl)ccc12	3.95468	3.95468	0	CHEMBL4040007	CHEMBL4040007	TRUE
CN(CC=Cc1cccc(F)c1)Cc1ccc2c(c1)CCO2	CN(CC=Cc1cccc(Cl)c1)Cc1ccc2c(c1)CCO2	6	6	0	CHEMBL4019654	CHEMBL4019654	TRUE
CN(CC=Cc1ccccc1F)Cc1ccc2c(c1)OCCC2	CN(CC=Cc1ccccc1Cl)Cc1ccc2c(c1)OCCC2	6	6	0	CHEMBL4019654	CHEMBL4019654	TRUE
NC(=O)c1cnc2c(F)cc(-c3cccnc3)cc2c1NC1CCOCC1	NC(=O)c1cnc2c(Cl)cc(-c3cccnc3)cc2c1NC1CCOCC1	4.52288	4.52288	0	CHEMBL4478168	CHEMBL4478168	TRUE
CCS(=O)(=O)N1CCN(C2(CNC(=O)c3ccc(F)cc3Cl)CCC(F)(F)CC2)CC1	CCS(=O)(=O)N1CCN(C2(CNC(=O)c3ccc(Cl)cc3Cl)CCC(F)(F)CC2)CC1	4.12494	4.12494	0	CHEMBL4429877	CHEMBL4429877	TRUE
COc1ccc(-c2c(CO)n(Cc3cccc(F)c3)c3ccc(OC(F)(F)F)cc23)cn1	COc1ccc(-c2c(CO)n(Cc3cccc(Cl)c3)c3ccc(OC(F)(F)F)cc23)cn1	5	5	0	CHEMBL4479528	CHEMBL4479528	TRUE
O=C(Nc1nc2ccccc2s1)C(c1ccccc1F)S(=O)(=O)O	O=C(Nc1nc2ccccc2s1)C(c1ccccc1Cl)S(=O)(=O)O	3.69897	3.69897	0	CHEMBL4719000	CHEMBL4719000	TRUE
COC(=O)Cn1c(=O)oc2c(C(=O)C=Cc3ccc(O)c(F)c3)cccc21	COC(=O)Cn1c(=O)oc2c(C(=O)C=Cc3ccc(O)c(Cl)c3)cccc21	4	4	0	CHEMBL5148714	CHEMBL5148714	TRUE
O=C(c1ccc(F)c(O)c1)N1CCC(Cc2cccc(Oc3ccc(C(F)(F)F)cn3)c2)CC1	O=C(c1ccc(Cl)c(O)c1)N1CCC(Cc2cccc(Oc3ccc(C(F)(F)F)cn3)c2)CC1	5	5	0	CHEMBL5166871	CHEMBL5166871	TRUE
O=C(CCCCCn1cc(Nc2ncc3ccn(Cc4ccc(F)cc4)c3n2)cn1)NO	O=C(CCCCCn1cc(Nc2ncc3ccn(Cc4ccc(Cl)cc4)c3n2)cn1)NO	7	7	0	CHEMBL5038796	CHEMBL5038796	TRUE
O=C(CCCCCCn1cc(Nc2ncc3ccn(Cc4ccc(F)cc4)c3n2)cn1)NO	O=C(CCCCCCn1cc(Nc2ncc3ccn(Cc4ccc(Cl)cc4)c3n2)cn1)NO	7	7	0	CHEMBL5038796	CHEMBL5038796	TRUE
C=CC(=O)Nc1cccc(F)c1Nc1n[nH]c2ccc(OC(C)c3c(Cl)cncc3Cl)cc12	C=CC(=O)Nc1cccc(Cl)c1Nc1n[nH]c2ccc(OC(C)c3c(Cl)cncc3Cl)cc12	5	5	0	CHEMBL5161314	CHEMBL5161314	TRUE
[truncated: 1,612 more rows]

## Sheet: Functional assays
Structure F	Structure Cl	pIC50 F	pIC50 Cl	Diff pIC50	Assay F	Assay Cl	true/false			F	Cl	Difference
Cc1ccoc1C(=O)Nc1ccc(N2C(=O)c3ccc(F)cc3C2=O)cc1F	Cc1ccoc1C(=O)Nc1ccc(N2C(=O)c3ccc(Cl)cc3C2=O)cc1F	4.71444	8.27003	-3.55558	CHEMBL3762431	CHEMBL3762431	TRUE		Mean	6.16297	6.20898	-0.046015
O=C(NC(=S)NNC(=O)c1ccccc1O)c1ccc(F)cc1	O=C(NC(=S)NNC(=O)c1ccccc1O)c1ccc(Cl)cc1	6.05552	9.00877	-2.95326	CHEMBL4424484	CHEMBL4424484	TRUE		Median	6.07572	6.1549	0
N#Cc1ccc(Nc2nccc(C(Cl)c3cccc(F)c3)n2)cc1	N#Cc1ccc(Nc2nccc(C(Cl)c3cccc(Cl)c3)n2)cc1	5.8671	8.30103	-2.43393	CHEMBL3292952	CHEMBL3292952	TRUE
O=C(Cn1cc(-c2ccc(F)cc2)nn1)Nc1nc2ccccc2s1	O=C(Cn1cc(-c2ccc(Cl)cc2)nn1)Nc1nc2ccccc2s1	4.52288	6.88606	-2.36318	CHEMBL4305726	CHEMBL4305726	TRUE
Cc1cc(OCC(=O)Nc2ccc(F)cc2)nc(Nc2ccc(C#N)cc2)n1	Cc1cc(OCC(=O)Nc2ccc(Cl)cc2)nc(Nc2ccc(C#N)cc2)n1	3.47986	5.58004	-2.10019	CHEMBL3399853	CHEMBL3399853	TRUE
Cc1cc(OCC(=O)Nc2ccc(F)cc2)nc(Nc2ccc(C#N)cc2)n1	Cc1cc(OCC(=O)Nc2ccc(Cl)cc2)nc(Nc2ccc(C#N)cc2)n1	3.47986	5.58004	-2.10019	CHEMBL3399853	CHEMBL3399853	TRUE
C[CH](NC(=O)Cn1nc2ccccn2c1=O)c1ccc(Cl)c(F)c1	C[CH](NC(=O)Cn1nc2ccccn2c1=O)c1ccc(Cl)c(Cl)c1	7	9	-2	CHEMBL4739806	CHEMBL4739806	TRUE
CCc1ccc(-c2nc3cc(NC(=O)c4cc([N+](=O)[O-])ccc4F)ccc3o2)cc1	CCc1ccc(-c2nc3cc(NC(=O)c4cc([N+](=O)[O-])ccc4Cl)ccc3o2)cc1	6.48149	8.46852	-1.98704	CHEMBL5113065	CHEMBL5113065	TRUE
O=C(c1csc(-c2cccc(F)c2Cl)n1)N1CCOCC1	O=C(c1csc(-c2cccc(Cl)c2Cl)n1)N1CCOCC1	5	6.92445	-1.92445	CHEMBL4013335	CHEMBL4013335	TRUE
O=C(Nc1ccc(OCCCN2CCOCC2)c(F)c1)c1cccc(-c2cccc(O)c2)c1	O=C(Nc1ccc(OCCCN2CCOCC2)c(Cl)c1)c1cccc(-c2cccc(O)c2)c1	3.72688	5.64782	-1.92093	CHEMBL3399478	CHEMBL3399478	TRUE
O=C(Nc1ccc(OCCCN2CCOCC2)c(F)c1)c1cccc(-c2cccc(O)c2)c1	O=C(Nc1ccc(OCCCN2CCOCC2)c(Cl)c1)c1cccc(-c2cccc(O)c2)c1	3.72688	5.64782	-1.92093	CHEMBL3399478	CHEMBL3399478	TRUE
N#Cc1cc(F)cc(-c2cc(-n3cccn3)ncn2)c1	N#Cc1cc(Cl)cc(-c2cc(-n3cccn3)ncn2)c1	6.4	8.29999	-1.89999	CHEMBL3606567	CHEMBL3606567	TRUE
CC(NC(=O)c1cc(F)cnc1Oc1ccc(F)cc1)c1ccc(C(=O)O)cc1	CC(NC(=O)c1cc(Cl)cnc1Oc1ccc(F)cc1)c1ccc(C(=O)O)cc1	6.84466	8.60995	-1.76528	CHEMBL3997107	CHEMBL3997107	TRUE
NC(=O)c1cccc2c1CCN2c1cc(Cc2cnc(F)c(F)c2)ccn1	NC(=O)c1cccc2c1CCN2c1cc(Cc2cnc(F)c(Cl)c2)ccn1	7.21042	8.95861	-1.74819	CHEMBL4806971	CHEMBL4806971	TRUE
O=C(O)c1cccc(Cc2c(-c3ccccc3)nn3cc(F)ccc23)n1	O=C(O)c1cccc(Cc2c(-c3ccccc3)nn3cc(Cl)ccc23)n1	6.42022	8.09691	-1.67669	CHEMBL4045460	CHEMBL4045460	TRUE
O=C(Nc1cncc(Oc2cncnc2)n1)c1cccc(F)c1	O=C(Nc1cncc(Oc2cncnc2)n1)c1cccc(Cl)c1	5.29	6.93554	-1.64554	CHEMBL3363386	CHEMBL3363386	TRUE
COC(c1nc(SC2CCCC2)[nH]c(=O)c1C)c1c(F)cccc1F	COC(c1nc(SC2CCCC2)[nH]c(=O)c1C)c1c(F)cccc1Cl	5.55284	7.1549	-1.60206	CHEMBL4372507	CHEMBL4372507	TRUE
O=C1CC2(C(=O)Nc3ccc(Cl)cc32)c2cnn(Cc3ccc(F)cc3)c2N1	O=C1CC2(C(=O)Nc3ccc(Cl)cc32)c2cnn(Cc3ccc(Cl)cc3)c2N1	5.37675	6.95861	-1.58186	CHEMBL4629182	CHEMBL4629182	TRUE
Nc1c(S(=O)(=O)[O-])cc(Nc2cc(F)ccc2C(=O)O)c2c1C(=O)c1ccccc1C2=O	Nc1c(S(=O)(=O)[O-])cc(Nc2cc(Cl)ccc2C(=O)O)c2c1C(=O)c1ccccc1C2=O	4	5.55909	-1.55909	CHEMBL4011248	CHEMBL4011248	TRUE
CCn1nc(C#Cc2cc(C(=O)Nc3ccc(CN4CCN(C)CC4)c(C(F)(F)F)c3)ccc2F)c2c(N)ncnc21	CCn1nc(C#Cc2cc(C(=O)Nc3ccc(CN4CCN(C)CC4)c(C(F)(F)F)c3)ccc2Cl)c2c(N)ncnc21	5.7587	7.284	-1.52529	CHEMBL3429863	CHEMBL3429863	TRUE
O=C(Nc1cncc(Oc2cncc(F)c2)n1)c1cccc(F)c1	O=C(Nc1cncc(Oc2cncc(F)c2)n1)c1cccc(Cl)c1	5.41794	6.93	-1.51206	CHEMBL3363386	CHEMBL3363386	TRUE
Fc1ccc(Cc2cc3c(nn2)CCNCC3)cc1	Clc1ccc(Cc2cc3c(nn2)CCNCC3)cc1	5	6.50864	-1.50864	CHEMBL4426952	CHEMBL4426952	TRUE
O=C(O)c1cc(F)ccc1S(=O)(=O)NCCCCN1C(=O)c2cccc3cccc(c23)C1=O	O=C(O)c1cc(Cl)ccc1S(=O)(=O)NCCCCN1C(=O)c2cccc3cccc(c23)C1=O	9.82391	11.2958	-1.47194	CHEMBL3363669	CHEMBL3363669	TRUE
O=C(OC1CN2CCC1CC2)N1CCc2ccccc2C1c1ccc(F)cc1	O=C(OC1CN2CCC1CC2)N1CCc2ccccc2C1c1ccc(Cl)cc1	5	6.4698	-1.4698	CHEMBL4823147	CHEMBL4823147	TRUE
CC(=O)c1ccc(OCc2cccc(Oc3ccc(-c4nn[nH]n4)cn3)c2)c(F)c1O	CC(=O)c1ccc(OCc2cccc(Oc3ccc(-c4nn[nH]n4)cn3)c2)c(Cl)c1O	5.96819	7.40561	-1.43742	CHEMBL3873874	CHEMBL3873874	TRUE
Cc1ccoc1C(=O)Nc1cnc(N2C(=O)c3cccc(F)c3C2=O)nc1	Cc1ccoc1C(=O)Nc1cnc(N2C(=O)c3cccc(Cl)c3C2=O)nc1	5.27	6.68194	-1.41194	CHEMBL3635102	CHEMBL3635102	TRUE
O=C(Nc1cccc(F)n1)c1cc(F)cc(Oc2cncnc2)c1	O=C(Nc1cccc(F)n1)c1cc(Cl)cc(Oc2cncnc2)c1	6.58838	8	-1.41162	CHEMBL2446782	CHEMBL2446782	TRUE
NC1=NC(c2cccc(F)c2)CO1	NC1=NC(c2cccc(Cl)c2)CO1	6.3098	7.67778	-1.36798	CHEMBL3783756	CHEMBL3783756	TRUE
Cc1nn(C)c(Oc2ccccc2F)c1C(=O)N1CCCCC1c1cccnc1	Cc1nn(C)c(Oc2ccccc2Cl)c1C(=O)N1CCCCC1c1cccnc1	6.47237	7.82391	-1.35154	CHEMBL2343388	CHEMBL2343388	TRUE
O=C(O)CCc1ccc2[nH]c(-c3ccccc3F)cc2c1	O=C(O)CCc1ccc2[nH]c(-c3ccccc3Cl)cc2c1	5.91829	7.26281	-1.34451	CHEMBL4144231	CHEMBL4144231	TRUE
C[CH](Nc1nc(N)nc(N)c1C#N)c1nn(-c2cccnc2)c2cc(F)ccc12	C[CH](Nc1nc(N)nc(N)c1C#N)c1nn(-c2cccnc2)c2cc(Cl)ccc12	4.52549	5.86646	-1.34097	CHEMBL5159604	CHEMBL5159604	TRUE
COc1ccc(C23c4ccccc4C(=O)N2CCN3C(=O)c2cc(F)c(F)c(F)c2)cc1F	COc1ccc(C23c4ccccc4C(=O)N2CCN3C(=O)c2cc(F)c(F)c(F)c2)cc1Cl	4.52288	5.85387	-1.33099	CHEMBL3380864	CHEMBL3380864	TRUE
CC(C)c1sc(N2CCN(C)CC2)nc1C(=O)Nc1ccc(F)cc1F	CC(C)c1sc(N2CCN(C)CC2)nc1C(=O)Nc1ccc(F)cc1Cl	5.923	7.23657	-1.31358	CHEMBL4427276	CHEMBL4427276	TRUE
Fc1cccc(-c2cc3n(n2)CCCC3)c1	Clc1cccc(-c2cc3n(n2)CCCC3)c1	5.80327	7.11351	-1.31024	CHEMBL2410241	CHEMBL2410241	TRUE
Cn1c(-c2ccc(F)cc2)cnc1NC(=O)c1ccc(F)cc1	Cn1c(-c2ccc(Cl)cc2)cnc1NC(=O)c1ccc(F)cc1	4	5.3098	-1.3098	CHEMBL5117906	CHEMBL5117906	TRUE
N[CH]1CCCCC/C=C\[CH]2C[C]2(C(=O)NS(=O)(=O)C2CC2)NC(=O)[CH]2C[CH](OC(=O)N3Cc4cccc(F)c4C3)CN2C1=O	N[CH]1CCCCC/C=C\[CH]2C[C]2(C(=O)NS(=O)(=O)C2CC2)NC(=O)[CH]2C[CH](OC(=O)N3Cc4cccc(Cl)c4C3)CN2C1=O	5.5157	6.82391	-1.30821	CHEMBL3122259	CHEMBL3122259	TRUE
COc1ccc2c(OCCC3NC(=O)N(C)CCCCC=CC4CC4(C(=O)NS(=O)(=O)C4CC4)NC3=O)cc(-c3nc(C(C)C)cs3)nc2c1F	COc1ccc2c(OCCC3NC(=O)N(C)CCCCC=CC4CC4(C(=O)NS(=O)(=O)C4CC4)NC3=O)cc(-c3nc(C(C)C)cs3)nc2c1Cl	5.82681	7.11634	-1.28952	CHEMBL3611341	CHEMBL3611341	TRUE
COc1ccc2c(OCCC3NC(=O)N(C)CCCCC=CC4CC4(C(=O)NS(=O)(=O)C4(C)CC4)NC3=O)cc(-c3nc(C(C)C)cs3)nc2c1F	COc1ccc2c(OCCC3NC(=O)N(C)CCCCC=CC4CC4(C(=O)NS(=O)(=O)C4(C)CC4)NC3=O)cc(-c3nc(C(C)C)cs3)nc2c1Cl	6.25571	7.54212	-1.28641	CHEMBL3611341	CHEMBL3611341	TRUE
O=C1CCCc2nc(Nc3cccc(F)c3)ncc21	O=C1CCCc2nc(Nc3cccc(Cl)c3)ncc21	5.6517	6.92082	-1.26912	CHEMBL2410491	CHEMBL2410491	TRUE
CC1(C)OC2=C(C(=O)C(=O)c3ccccc32)C1Sc1ccc(F)cc1	CC1(C)OC2=C(C(=O)C(=O)c3ccccc32)C1Sc1ccc(Cl)cc1	3.78331	5.03621	-1.25291	CHEMBL3595961	CHEMBL3595961	TRUE
CC1(C)OC2=C(C(=O)C(=O)c3ccccc32)C1Sc1ccc(F)cc1	CC1(C)OC2=C(C(=O)C(=O)c3ccccc32)C1Sc1ccc(Cl)cc1	3.78331	5.03621	-1.25291	CHEMBL3595961	CHEMBL3595961	TRUE
COc1cc(C(=O)c2c(-c3ccccc3)[nH]c3cc(F)ccc23)cc(OC)c1OC	COc1cc(C(=O)c2c(-c3ccccc3)[nH]c3cc(Cl)ccc23)cc(OC)c1OC	6.22185	7.45593	-1.23408	CHEMBL3599632	CHEMBL3599632	TRUE
Cc1ccc(NC(=O)c2ccc(F)c(C(F)(F)F)c2)cc1C#Cc1nn(C2CCN(C)CC2)c2ncnc(N)c12	Cc1ccc(NC(=O)c2ccc(Cl)c(C(F)(F)F)c2)cc1C#Cc1nn(C2CCN(C)CC2)c2ncnc(N)c12	6.2815	7.50864	-1.22714	CHEMBL4766120	CHEMBL4766120	TRUE
CCN(c1ccc(F)cc1F)S(=O)(=O)c1cc(Cl)ccc1F	CCN(c1ccc(F)cc1F)S(=O)(=O)c1cc(Cl)ccc1Cl	6.08619	7.284	-1.19781	CHEMBL4827555	CHEMBL4827555	TRUE
Cc1cc(NC(=O)Cn2cc(-c3ccc(F)cc3)nn2)no1	Cc1cc(NC(=O)Cn2cc(-c3ccc(Cl)cc3)nn2)no1	4.52288	5.71897	-1.19609	CHEMBL4305726	CHEMBL4305726	TRUE
O=C(Nc1nc(C(F)(F)F)cs1)c1cc(F)cc(Oc2cncnc2)c1	O=C(Nc1nc(C(F)(F)F)cs1)c1cc(Cl)cc(Oc2cncnc2)c1	5.49	6.68	-1.19	CHEMBL2446782	CHEMBL2446782	TRUE
CCN(c1ccc(F)cc1F)S(=O)(=O)c1cc(F)ccc1F	CCN(c1ccc(F)cc1F)S(=O)(=O)c1cc(F)ccc1Cl	5.46852	6.65758	-1.18906	CHEMBL4827555	CHEMBL4827555	TRUE
Cc1cc(C(=O)O)nn1Cc1cc(F)cc2sc(N3CC=CCC3)nc12	Cc1cc(C(=O)O)nn1Cc1cc(Cl)cc2sc(N3CC=CCC3)nc12	7.76955	8.95861	-1.18906	CHEMBL4035427	CHEMBL4035427	TRUE
COc1cc2ncnc(-c3c(-c4ccc(F)cc4)[nH]c4ccccc34)c2cc1OCCCN1CCOCC1	COc1cc2ncnc(-c3c(-c4ccc(Cl)cc4)[nH]c4ccccc34)c2cc1OCCCN1CCOCC1	6.52288	7.69897	-1.17609	CHEMBL4844822	CHEMBL4844822	TRUE
CCN1CCN(c2ccc(S(=O)(=O)Oc3cccc(F)c3)cc2)C1=O	CCN1CCN(c2ccc(S(=O)(=O)Oc3cccc(Cl)c3)cc2)C1=O	4	5.16749	-1.16749	CHEMBL4016263	CHEMBL4016263	TRUE
COc1ccc2c(OCC3CC4C(=O)N(C)CCCCC=CC5CC5(C(=O)NS(=O)(=O)C5(C)CC5)NC(=O)N34)cc(-c3nc(C(C)C)cs3)nc2c1F	COc1ccc2c(OCC3CC4C(=O)N(C)CCCCC=CC5CC5(C(=O)NS(=O)(=O)C5(C)CC5)NC(=O)N34)cc(-c3nc(C(C)C)cs3)nc2c1Cl	6.05963	7.22185	-1.16222	CHEMBL3363103	CHEMBL3363103	TRUE
CN1CCN(c2ccc(Nc3ncc4ncc(=O)n(-c5ccc(N)cc5)c4n3)cc2F)CC1	CN1CCN(c2ccc(Nc3ncc4ncc(=O)n(-c5ccc(N)cc5)c4n3)cc2Cl)CC1	5.84863	7.00877	-1.16014	CHEMBL4478228	CHEMBL4478228	TRUE
Nc1ncnc2c1c(-c1ccc(F)cc1)cn2[CH]1O[CH](CO)C[CH]1O	Nc1ncnc2c1c(-c1ccc(Cl)cc1)cn2[CH]1O[CH](CO)C[CH]1O	6.19382	7.3279	-1.13408	CHEMBL4383194	CHEMBL4383194	TRUE
Cc1ccc(NC(=O)c2cccc(F)c2)cc1C#Cc1nn(C2CCN(C)CC2)c2ncnc(N)c12	Cc1ccc(NC(=O)c2cccc(Cl)c2)cc1C#Cc1nn(C2CCN(C)CC2)c2ncnc(N)c12	6.09044	7.22185	-1.1314	CHEMBL4766120	CHEMBL4766120	TRUE
Nc1ncc2cc(NC(=O)c3ccc(F)cc3)ccc2n1	Nc1ncc2cc(NC(=O)c3ccc(Cl)cc3)ccc2n1	3.69897	4.82391	-1.12494	CHEMBL4374185	CHEMBL4374185	TRUE
CN1N=C2c3ccccc3OC(c3ccccc3)C2C1c1ccc(F)cc1	CN1N=C2c3ccccc3OC(c3ccccc3)C2C1c1ccc(Cl)cc1	4.01011	5.13077	-1.12066	CHEMBL3815778	CHEMBL3815778	TRUE
C[CH](NC(=O)Cn1nnc2ccccc2c1=O)c1ccc(F)cc1	CC(NC(=O)Cn1nnc2ccccc2c1=O)c1ccc(Cl)cc1	6	7.10237	-1.10237	CHEMBL4810043	CHEMBL4810043	TRUE
CCc1nc(Cl)c2n1CCN(C(C(=O)NC)c1ccccc1)C2CCc1ccc(C(F)(F)F)c(F)c1	CCc1nc(Cl)c2n1CCN(C(C(=O)NC)c1ccccc1)C2CCc1ccc(C(F)(F)F)c(Cl)c1	6.64397	7.74473	-1.10075	CHEMBL2400168	CHEMBL2400168	TRUE
COc1cccc(NC(=O)c2cc(F)cc(Oc3cncnc3)c2)n1	COc1cccc(NC(=O)c2cc(Cl)cc(Oc3cncnc3)c2)n1	6.18	7.27003	-1.09002	CHEMBL2446782	CHEMBL2446782	TRUE
Fc1ccc(C(c2nnnn2C2CCCCC2)N2CCc3c([nH]c4ccccc34)C2)cc1	Clc1ccc(C(c2nnnn2C2CCCCC2)N2CCc3c([nH]c4ccccc34)C2)cc1	4.60206	5.68194	-1.07988	CHEMBL4257684	CHEMBL4257684	TRUE
CC1(O)C(c2cc(F)c3c(N)ncnn23)OC(CO)C1O	CC1(O)C(c2cc(Cl)c3c(N)ncnn23)OC(CO)C1O	5.50864	6.58503	-1.07639	CHEMBL3386513	CHEMBL3386513	TRUE
Fc1cccc2c1nnn2CC1CC1	Clc1cccc2c1nnn2CC1CC1	5.97062	7.04576	-1.07514	CHEMBL4309066	CHEMBL4309066	TRUE
O=C(C=Cc1cccc(F)c1)N1N=C(c2ccncc2)OC1c1c[nH]c2ccccc12	O=C(C=Cc1cccc(Cl)c1)N1N=C(c2ccncc2)OC1c1c[nH]c2ccccc12	7.52288	8.59517	-1.07229	CHEMBL3784857	CHEMBL3784857	TRUE
CC(NC(=O)c1nn(-c2ccc(Cl)cc2Cl)c2c1CCCC2=Cc1ccc(F)cc1)c1ccccn1	CC(NC(=O)c1nn(-c2ccc(Cl)cc2Cl)c2c1CCCC2=Cc1ccc(Cl)cc1)c1ccccn1	5	6.06854	-1.06854	CHEMBL3863166	CHEMBL3863166	TRUE
CC(C)n1nc(Cc2cc(F)cc(F)c2)c2c(N)ncnc21	CC(C)n1nc(Cc2cc(F)cc(Cl)c2)c2c(N)ncnc21	5.68403	6.74473	-1.0607	CHEMBL2330479	CHEMBL2330479	TRUE
CCOC(=O)C1=C(CN2CCOCC2C(=O)O)NC(c2nccs2)=NC1c1ccc(F)cc1Cl	CCOC(=O)C1=C(CN2CCOC[CH]2C(=O)O)NC(c2nccs2)=N[CH]1c1ccc(Cl)cc1Cl	7.20761	8.24413	-1.03652	CHEMBL4028622	CHEMBL4028622	TRUE
CCNC(=O)[CH]1O[CH](n2cnc3c(N)nc(N4CCN(c5ccc(OCc6ccc(F)cc6)cc5)CC4)nc32)[CH](O)[CH]1O	CCNC(=O)[CH]1O[CH](n2cnc3c(N)nc(N4CCN(c5ccc(OCc6ccc(Cl)cc6)cc5)CC4)nc32)[CH](O)[CH]1O	5	6.03292	-1.03292	CHEMBL3419487	CHEMBL3419487	TRUE
O=C(c1csc(-c2cccc(Cl)c2F)n1)N1CCOCC1	O=C(c1csc(-c2cccc(Cl)c2Cl)n1)N1CCOCC1	5.89551	6.92445	-1.02894	CHEMBL4013335	CHEMBL4013335	TRUE
O=C(Nc1ccc(Cl)cn1)c1cc(F)cc(Oc2cncnc2)c1	O=C(Nc1ccc(Cl)cn1)c1cc(Cl)cc(Oc2cncnc2)c1	5.96658	6.99	-1.02342	CHEMBL2446782	CHEMBL2446782	TRUE
Cc1ocnc1C(=O)Nc1ccc(N2C(=O)c3cccc(F)c3C2=O)c(Cl)c1	Cc1ocnc1C(=O)Nc1ccc(N2C(=O)c3cccc(Cl)c3C2=O)c(Cl)c1	5	6.00745	-1.00745	CHEMBL3762433	CHEMBL3762433	TRUE
Cc1c(F)cccc1-n1c(N)nc2ccc(O)nc21	Cc1c(Cl)cccc1-n1c(N)nc2ccc(O)nc21	5.63264	6.63827	-1.00563	CHEMBL3721245	CHEMBL3721245	TRUE
COc1ccc(-c2cnc(NC(=O)c3cccc(F)c3)n2C)cc1	COc1ccc(-c2cnc(NC(=O)c3cccc(Cl)c3)n2C)cc1	4	5	-1	CHEMBL5117906	CHEMBL5117906	TRUE
COc1cc(C(=O)NS(=O)(=O)c2cccc(F)c2)ccc1Cc1cn(C)c2ccc(NC(=O)NC3CCCCC3)cc12	COc1cc(C(=O)NS(=O)(=O)c2cccc(Cl)c2)ccc1Cc1cn(C)c2ccc(NC(=O)NC3CCCCC3)cc12	7.89997	8.89997	-1	CHEMBL4256762	CHEMBL4256762	TRUE
O=C(c1cc(F)cc(F)c1)N1CCN2C(=O)c3ccccc3C12c1ccc(F)cc1	O=C(c1cc(F)cc(F)c1)N1CCN2C(=O)c3ccccc3C12c1ccc(Cl)cc1	5	6	-1	CHEMBL3107686	CHEMBL3107686	TRUE
CCOP(=O)(OCC)C(O)[CH](C[CH]1CCNC1=O)NC(=O)[CH](CC1CCCCC1)NC(=O)OCc1ccccc1F	CCOP(=O)(OCC)C(O)[CH](C[CH]1CCNC1=O)NC(=O)[CH](CC1CCCCC1)NC(=O)OCc1ccccc1Cl	5.69897	6.69897	-1	CHEMBL3429732	CHEMBL3429732	TRUE
O=C(O)c1cccc(COc2cccc(Cl)c2F)c1	O=C(O)c1cccc(COc2cccc(Cl)c2Cl)c1	6	7	-1	CHEMBL4808118	CHEMBL4808118	TRUE
C[CH](NC(=O)Cn1nc2ccccn2c1=O)c1ccc(F)cc1	C[CH](NC(=O)Cn1nc2ccccn2c1=O)c1ccc(Cl)cc1	8	9	-1	CHEMBL4739806	CHEMBL4739806	TRUE
Cc1cc(F)ccc1OCc1cccc(C(=O)O)c1	Cc1cc(Cl)ccc1OCc1cccc(C(=O)O)c1	6	7	-1	CHEMBL4808118	CHEMBL4808118	TRUE
CC(C)n1c(Cn2nc(-c3cccc(O)c3)c3c(N)ncnc32)cc2cccc(F)c2c1=O	CC(C)n1c(Cn2nc(-c3cccc(O)c3)c3c(N)ncnc32)cc2cccc(Cl)c2c1=O	6	7	-1	CHEMBL3880117	CHEMBL3880117	TRUE
Cc1cccc2cc(Cn3nc(-c4cccc(O)c4)c4c(N)ncnc43)n(-c3ccccc3F)c(=O)c12	Cc1cccc2cc(Cn3nc(-c4cccc(O)c4)c4c(N)ncnc43)n(-c3ccccc3Cl)c(=O)c12	6	7	-1	CHEMBL3880117	CHEMBL3880117	TRUE
Cc1cccc2cc(Cn3nc(-c4cn[nH]c4)c4c(N)ncnc43)n(-c3ccccc3F)c(=O)c12	Cc1cccc2cc(Cn3nc(-c4cn[nH]c4)c4c(N)ncnc43)n(-c3ccccc3Cl)c(=O)c12	6	7	-1	CHEMBL3880117	CHEMBL3880117	TRUE
Cc1cccc2cc(Cn3nc(I)c4c(N)ncnc43)n(-c3ccccc3F)c(=O)c12	Cc1cccc2cc(Cn3nc(I)c4c(N)ncnc43)n(-c3ccccc3Cl)c(=O)c12	5	6	-1	CHEMBL3880117	CHEMBL3880117	TRUE
COc1cc(Nc2ccnc3ccc(F)cc23)cc(OC)c1OC	COc1cc(Nc2ccnc3ccc(Cl)cc23)cc(OC)c1OC	5.284	6.284	-1	CHEMBL4726305	CHEMBL4726305	TRUE
COc1cc(Nc2ncnc3ccc(F)cc23)cc(OC)c1OC	COc1cc(Nc2ncnc3ccc(Cl)cc23)cc(OC)c1OC	5	6	-1	CHEMBL4726305	CHEMBL4726305	TRUE
CN1C[CH](CNC(=O)c2ccc(F)cc2)C[CH]2c3cccc4c3c(cn4C)C[CH]21	CN1C[CH](CNC(=O)c2ccc(Cl)cc2)C[CH]2c3cccc4c3c(cn4C)C[CH]21	4.90309	5.88606	-0.982967	CHEMBL3137177	CHEMBL3137177	TRUE
COc1ccc2c(OC3CC4C(=O)N(C)CCCCC=CC5CC5(C(=O)NS(=O)(=O)C5(C)CC5)NC(=O)N4C3)cc(-c3nc(C(C)C)cs3)nc2c1F	COc1ccc2c(OC3CC4C(=O)N(C)CCCCC=CC5CC5(C(=O)NS(=O)(=O)C5(C)CC5)NC(=O)N4C3)cc(-c3nc(C(C)C)cs3)nc2c1Cl	6.26922	7.25181	-0.982594	CHEMBL3636991	CHEMBL3636991	TRUE
COc1ccc(C(=O)Nc2ccc(OCCN3CCCC3)c(F)c2)c(-c2cccc(O)c2)c1O	COc1ccc(C(=O)Nc2ccc(OCCN3CCCC3)c(Cl)c2)c(-c2cccc(O)c2)c1O	4.93293	5.91364	-0.980711	CHEMBL3399478	CHEMBL3399478	TRUE
COc1ccc(C(=O)Nc2ccc(OCCN3CCCC3)c(F)c2)c(-c2cccc(O)c2)c1O	COc1ccc(C(=O)Nc2ccc(OCCN3CCCC3)c(Cl)c2)c(-c2cccc(O)c2)c1O	4.93293	5.91364	-0.980711	CHEMBL3399478	CHEMBL3399478	TRUE
CC(C)CC1(O)CCN(C(=O)Nc2cc(Oc3ccc(F)cc3)cc(Oc3ccc(C(=O)O)c(F)c3)c2)CC1	CC(C)CC1(O)CCN(C(=O)Nc2cc(Oc3ccc(F)cc3)cc(Oc3ccc(C(=O)O)c(Cl)c3)c2)CC1	7.46852	8.4437	-0.975176	CHEMBL3762854	CHEMBL3762854	TRUE
COc1ccc(C(C)(C)c2cnc(SCCOCc3c(F)cccc3F)n2-c2ccc(F)cc2)cc1OC	COc1ccc(C(C)(C)c2cnc(SCCOCc3c(F)cccc3Cl)n2-c2ccc(F)cc2)cc1OC	7.84164	8.79588	-0.954243	CHEMBL4121798	CHEMBL4121798	TRUE
O=C(CCC#Cc1ccc(O)cc1F)NC1=C(C(=O)O)CCCC1	O=C(CCC#Cc1ccc(O)cc1Cl)NC1=C(C(=O)O)CCCC1	7.09691	8.04576	-0.948847	CHEMBL4056812	CHEMBL4056812	TRUE
NCCN(C(=O)c1ccccc1F)c1ccc(Cl)cc1	NCCN(C(=O)c1ccccc1Cl)c1ccc(Cl)cc1	5.40894	6.35655	-0.947612	CHEMBL4002341	CHEMBL4002341	TRUE
Oc1ccc2c(c1)Cc1c(-c3ccccc3O)cc(-c3cccc(F)c3)nc1-2	Oc1ccc2c(c1)Cc1c(-c3ccccc3O)cc(-c3cccc(Cl)c3)nc1-2	5.50446	6.4437	-0.939242	CHEMBL4375832	CHEMBL4375832	TRUE
O=C(N[CH](Cc1c[nH]c2ccccc12)C(=O)Nc1ccncc1)c1ccc(N2CCN(c3cccc(F)c3)CC2)cc1F	O=C(N[CH](Cc1c[nH]c2ccccc12)C(=O)Nc1ccncc1)c1ccc(N2CCN(c3cccc(Cl)c3)CC2)cc1F	7.22915	8.16749	-0.938343	CHEMBL3366950	CHEMBL3366950	TRUE
O=C(NC1CCNCC1)c1n[nH]cc1NC(=O)c1c(F)cccc1F	O=C(NC1CCNCC1)c1n[nH]cc1NC(=O)c1c(F)cccc1Cl	4.64853	5.58403	-0.935493	CHEMBL4151772	CHEMBL4151772	TRUE
NC1=NC2(CCCCC2)NC(Nc2cccc(F)c2)=N1	NC1=NC2(CCCCC2)NC(Nc2cccc(Cl)c2)=N1	6.39426	7.32883	-0.934563	CHEMBL4269540	CHEMBL4269540	TRUE
O=C1Nc2ccc(Nc3ccc(F)cc3)cc2C1=Cc1ccc2c(c1)OCO2	O=C1Nc2ccc(Nc3ccc(Cl)cc3)cc2C1=Cc1ccc2c(c1)OCO2	4.58004	5.50864	-0.928594	CHEMBL4370938	CHEMBL4370938	TRUE
CC1=CCC2C(OC(c3ccc(F)cc3)CC2(C)O)C1O	CC1=CCC2C(OC(c3ccc(Cl)cc3)CC2(C)O)C1O	3.65956	4.58503	-0.925471	CHEMBL3860882	CHEMBL3860882	TRUE
CC1(C)[CH]2CC[C]1(C(=O)O/N=C(\N)Cc1ccc(F)cc1)C(=O)C2	CC1(C)[CH]2CC[C]1(C(=O)O/N=C(\N)Cc1ccc(Cl)cc1)C(=O)C2	3.89963	4.82391	-0.924279	CHEMBL5133197	CHEMBL5133197	TRUE
O=C(CCn1ccc2ccccc21)NCC/N=C/c1ccc(F)c(C(F)(F)F)c1	O=C(CCn1ccc2ccccc21)NCC/N=C/c1ccc(Cl)c(C(F)(F)F)c1	6.69897	7.61979	-0.920819	CHEMBL5116486	CHEMBL5116486	TRUE
Fc1ccc(C2=NN(c3nc(-c4ccc(C(F)(F)F)cc4)cs3)C(c3cccs3)C2)cc1	FC(F)(F)c1ccc(-c2csc(N3N=C(c4ccc(Cl)cc4)CC3c3cccs3)n2)cc1	5.87615	6.79588	-0.919732	CHEMBL3371860	CHEMBL3371860	TRUE
Fc1ccc(C2=NN(c3nc(-c4ccc(C(F)(F)F)cc4)cs3)C(c3cccs3)C2)cc1	FC(F)(F)c1ccc(-c2csc(N3N=C(c4ccc(Cl)cc4)CC3c3cccs3)n2)cc1	5.87615	6.79588	-0.919732	CHEMBL3371860	CHEMBL3371860	TRUE
COC(=O)C1=C(CN2CCOCC2)NC(c2nccs2)=N[C]1(C)c1ccc(F)c(F)c1	COC(=O)C1=C(CN2CCOCC2)NC(c2nccs2)=NC1(C)c1ccc(F)c(Cl)c1	4.18177	5.09151	-0.909741	CHEMBL4432094	CHEMBL4432094	TRUE
O=C1Cn2c(cc3cc(F)ccc32)C(=O)N1O	O=C1Cn2c(cc3cc(Cl)ccc32)C(=O)N1O	4.07676	4.97881	-0.902055	CHEMBL3807266	CHEMBL3807266	TRUE
Oc1c(-c2nnc(Cc3ccc(F)cc3)[nH]2)ncc2cccnc12	Oc1c(-c2nnc(Cc3ccc(Cl)cc3)[nH]2)ncc2cccnc12	5.6	6.5	-0.899998	CHEMBL4621667	CHEMBL4621667	TRUE
CN(C)c1ccc(N2C(=O)CN(Cc3ccccc3)C2=S)cc1F	CN(C)c1ccc(N2C(=O)CN(Cc3ccccc3)C2=S)cc1Cl	6.90309	7.79588	-0.89279	CHEMBL4193895	CHEMBL4193895	TRUE
COc1ccc(-c2cnc(NC(=O)c3ccccc3F)n2C)cc1	COc1ccc(-c2cnc(NC(=O)c3ccccc3Cl)n2C)cc1	4	4.88606	-0.886057	CHEMBL5117906	CHEMBL5117906	TRUE
CCN(c1cc2oc(F)cc2c(C(=O)NCc2c(OC)cc(C)[nH]c2=O)c1C)C1CCOCC1	CCN(c1cc2oc(Cl)cc2c(C(=O)NCc2c(OC)cc(C)[nH]c2=O)c1C)C1CCOCC1	6.79588	7.67778	-0.881901	CHEMBL4144879	CHEMBL4144879	TRUE
CNc1ccc(/C=C/c2c(F)cccc2F)cn1	CNc1ccc(/C=C/c2c(F)cccc2Cl)cn1	7.52143	8.39794	-0.876507	CHEMBL3378078	CHEMBL3378078	TRUE
NC(=O)c1c(NC(=O)c2ccccc2Cl)sc2c1CCN(Cc1ccccc1F)C2	NC(=O)c1c(NC(=O)c2ccccc2Cl)sc2c1CCN(Cc1ccccc1Cl)C2	4.66115	5.5376	-0.876457	CHEMBL4344500	CHEMBL4344500	TRUE
O=C(NO)c1ccccc1F	O=C(NO)c1ccccc1Cl	4.82391	5.69897	-0.875061	CHEMBL2439404	CHEMBL2439404	TRUE
CN(C)c1ccc(N2C(=O)CN(Cc3ccc(F)cc3Cl)C2=S)cc1F	CN(C)c1ccc(N2C(=O)CN(Cc3ccc(F)cc3Cl)C2=S)cc1Cl	7.82391	8.69897	-0.875061	CHEMBL4193895	CHEMBL4193895	TRUE
CCOC(=O)N1CCC(=CC#Cc2cccc(F)c2)CC1	CCOC(=O)N1CCC(=CC#Cc2cccc(Cl)c2)CC1	7.72816	8.60206	-0.873902	CHEMBL4413473	CHEMBL4413473	TRUE
O=C(Nc1cccc(C(F)(F)F)n1)c1cc(F)cc(Oc2cncnc2)c1	O=C(Nc1cccc(C(F)(F)F)n1)c1cc(Cl)cc(Oc2cncnc2)c1	5.64	6.51	-0.87	CHEMBL2446782	CHEMBL2446782	TRUE
CN(Cc1c(-c2cc(F)cc(Cl)c2)cnc2ncn(-c3cccc(O)c3)c(=O)c12)CC1CCCN1	CN(Cc1c(-c2cc(Cl)cc(Cl)c2)cnc2ncn(-c3cccc(O)c3)c(=O)c12)CC1CCCN1	7.59998	8.46852	-0.868541	CHEMBL4669860	CHEMBL4669860	TRUE
COc1cc(CNCc2ccncc2)ccc1OCc1ccc(F)cc1	COc1cc(CNCc2ccncc2)ccc1OCc1ccc(Cl)cc1	5.19382	6.05061	-0.85679	CHEMBL3372887	CHEMBL3372887	TRUE
Cc1ncnc2c1ccn2[CH]1O[CH]2[CH](Oc3ccc4cc(F)c(N)nc4c3)CC[C]2(O)[CH]1O	Cc1ncnc2c1ccn2[CH]1O[CH]2[CH](Oc3ccc4cc(Cl)c(N)nc4c3)CC[C]2(O)[CH]1O	6.76447	7.61979	-0.855317	CHEMBL4808436	CHEMBL4808436	TRUE
Fc1ccc(-c2n[nH]cc2N2CCNCC2)cc1	Clc1ccc(-c2n[nH]cc2N2CCNCC2)cc1	5.2	6.05159	-0.851587	CHEMBL4828349	CHEMBL4828349	TRUE
O=C(Nc1nc(C(F)F)cs1)c1cc(F)cc(Oc2cncnc2)c1	O=C(Nc1nc(C(F)F)cs1)c1cc(Cl)cc(Oc2cncnc2)c1	5.65758	6.50864	-0.851061	CHEMBL2446782	CHEMBL2446782	TRUE
CN(C)c1ccc(N2C(=O)CN(Cc3ccc(F)cc3F)C2=S)cc1F	CN(C)c1ccc(N2C(=O)CN(Cc3ccc(F)cc3F)C2=S)cc1Cl	7.55284	8.39794	-0.845098	CHEMBL4193895	CHEMBL4193895	TRUE
O=C(O)c1csc(C2CCC3C(CC(O)C3COc3ccccc3F)O2)n1	O=C(O)c1csc(C2CCC3C(CC(O)C3COc3ccccc3Cl)O2)n1	7.63827	8.48149	-0.843214	CHEMBL3808242	CHEMBL3808242	TRUE
O=C(NC1CCCC(NC(=O)c2cccc(F)c2)C1)c1cccc(F)c1	O=C(NC1CCCC(NC(=O)c2cccc(Cl)c2)C1)c1cccc(F)c1	6.22695	7.0655	-0.838556	CHEMBL2343304	CHEMBL2343304	TRUE
O=C(CSc1nnccc1-c1cccc2ccccc12)Nc1ccccc1F	O=C(CSc1nnccc1-c1cccc2ccccc12)Nc1ccccc1Cl	3.6187	4.45618	-0.837476	CHEMBL3135562	CHEMBL3135562	TRUE
Cn1c(-c2ccccc2F)cnc1NC(=O)c1ccc(F)cc1	Cn1c(-c2ccccc2Cl)cnc1NC(=O)c1ccc(F)cc1	4	4.82391	-0.823909	CHEMBL5117906	CHEMBL5117906	TRUE
CN1CCC(n2cc(-c3cnc(N4CCOC(Cn5nc(-c6ccc(F)c(F)c6)ccc5=O)C4)nc3)cn2)CC1	CN1CCC(n2cc(-c3cnc(N4CCOC(Cn5nc(-c6ccc(F)c(Cl)c6)ccc5=O)C4)nc3)cn2)CC1	5	5.82391	-0.823909	CHEMBL3389848	CHEMBL3389848	TRUE
O=c1cc(-c2ccc(F)cc2)c2cccc([N+](=O)[O-])c2[nH]1	O=c1cc(-c2ccc(Cl)cc2)c2cccc([N+](=O)[O-])c2[nH]1	4.55284	5.37675	-0.823909	CHEMBL3406369	CHEMBL3406369	TRUE
O=c1cc(-c2ccc(F)cc2)c2cccc([N+](=O)[O-])c2[nH]1	O=c1cc(-c2ccc(Cl)cc2)c2cccc([N+](=O)[O-])c2[nH]1	4.55284	5.37675	-0.823909	CHEMBL3406369	CHEMBL3406369	TRUE
OC(CN1CCN(c2ccccc2F)CC1)c1ccc(Br)cc1	OC(CN1CCN(c2ccccc2Cl)CC1)c1ccc(Br)cc1	4.78622	5.60889	-0.822672	CHEMBL3399742	CHEMBL3399742	TRUE
Cc1cc(C)c(CN2CCc3c(F)cc(O[CH]4CCOC4)c(Cl)c3C2=O)c(=O)[nH]1	Cc1cc(C)c(CN2CCc3c(Cl)cc(O[CH]4CCOC4)c(Cl)c3C2=O)c(=O)[nH]1	5.98885	6.80967	-0.820816	CHEMBL3858052	CHEMBL3858052	TRUE
O=C(Cc1ccccc1F)Nc1onc(-c2ccc(F)cc2)c1-c1ccncn1	O=C(Cc1ccccc1Cl)Nc1onc(-c2ccc(F)cc2)c1-c1ccncn1	6.9974	7.80967	-0.812266	CHEMBL3370279	CHEMBL3370279	TRUE
NC[CH](NC(=O)c1ccc(-c2ccc(F)cn2)[nH]1)c1nc(CO)cs1	NC[CH](NC(=O)c1ccc(-c2ccc(Cl)cn2)[nH]1)c1nc(CO)cs1	4.95861	5.76955	-0.810944	CHEMBL4404352	CHEMBL4404352	TRUE
Cc1cc(/C=C/C#N)ccc1Nc1ccc(F)c(Nc2ccc(F)cc2)n1	Cc1cc(/C=C/C#N)ccc1Nc1ccc(F)c(Nc2ccc(Cl)cc2)n1	6.39794	7.20066	-0.802719	CHEMBL3788480	CHEMBL3788480	TRUE
COc1nc(Cl)cnc1NS(=O)(=O)c1cccc(Cl)c1F	COc1nc(Cl)cnc1NS(=O)(=O)c1cccc(Cl)c1Cl	7.10002	7.89997	-0.799959	CHEMBL4134307	CHEMBL4134307	TRUE
CN(C)C(=O)[CH]1[CH](c2ccccc2)[C]2(c3ccc(F)cc3)Oc3cc(Cl)cnc3[C]2(O)[CH]1O	CN(C)C(=O)[CH]1[CH](c2ccccc2)[C]2(c3ccc(Cl)cc3)Oc3cc(Cl)cnc3[C]2(O)[CH]1O	6	6.79588	-0.79588	CHEMBL4616466	CHEMBL4616466	TRUE
Cc1cc(F)cc(-c2cnc3ncn(-c4cccc(O)c4)c(=O)c3c2CN(C)CC2CCCN2)c1	Cc1cc(Cl)cc(-c2cnc3ncn(-c4cccc(O)c4)c(=O)c3c2CN(C)CC2CCCN2)c1	8.13077	8.92082	-0.79005	CHEMBL4669860	CHEMBL4669860	TRUE
CS(=O)(=O)Cc1cccc(Nc2nccc(Oc3ccc4c(C(=O)Nc5ccc(F)cc5)cccc4c3)n2)c1	CS(=O)(=O)Cc1cccc(Nc2nccc(Oc3ccc4c(C(=O)Nc5ccc(Cl)cc5)cccc4c3)n2)c1	7.59176	8.37675	-0.784991	CHEMBL3745585	CHEMBL3745585	TRUE
O=C(O)CSCC(=O)Nc1ccc(-c2nc3cc(F)ccc3[nH]2)cc1	O=C(O)CSCC(=O)Nc1ccc(-c2nc3cc(Cl)ccc3[nH]2)cc1	4.22827	5.01233	-0.784068	CHEMBL3388394	CHEMBL3388394	TRUE
O=C(NO)c1ccc(CCCN2CCC(CNC3CC3c3ccc(-c4ccc(F)cc4)cc3)CC2)cc1	O=C(NO)c1ccc(CCCN2CCC(CNC3CC3c3ccc(-c4ccc(Cl)cc4)cc3)CC2)cc1	8.22185	9	-0.778151	CHEMBL4724381	CHEMBL4724381	TRUE
O=C(CCCCCCc1nc2ccc(F)cc2[nH]1)NO	O=C(CCCCCCc1nc2ccc(Cl)cc2[nH]1)NO	5.72125	6.49485	-0.773604	CHEMBL2417304	CHEMBL2417304	TRUE
Cc1[nH]c2cc([CH]3CCCCN3C(=O)c3cc(F)ccc3NS(C)(=O)=O)nn2c(=O)c1C	Cc1[nH]c2cc([CH]3CCCCN3C(=O)c3cc(Cl)ccc3NS(C)(=O)=O)nn2c(=O)c1C	7.09151	7.85387	-0.762357	CHEMBL3413799	CHEMBL3413799	TRUE
O=C(Nc1cccc(F)n1)c1cc(F)cc(Oc2cncnc2)c1	O=C(Nc1cccc(Cl)n1)c1cc(F)cc(Oc2cncnc2)c1	6.58838	7.34998	-0.761604	CHEMBL2446782	CHEMBL2446782	TRUE
O=C(Nc1ccc(OCCN2CCOCC2)c(F)c1)c1cccc(-c2cccc(O)c2)c1	O=C(Nc1ccc(OCCN2CCOCC2)c(Cl)c1)c1cccc(-c2cccc(O)c2)c1	4.07696	4.83714	-0.760174	CHEMBL3399478	CHEMBL3399478	TRUE
O=C(Nc1ccc(OCCN2CCOCC2)c(F)c1)c1cccc(-c2cccc(O)c2)c1	O=C(Nc1ccc(OCCN2CCOCC2)c(Cl)c1)c1cccc(-c2cccc(O)c2)c1	4.07696	4.83714	-0.760174	CHEMBL3399478	CHEMBL3399478	TRUE
Cc1ccoc1C(=O)Nc1ccc(N2C(=O)c3cccc(F)c3C2=O)nc1	Cc1ccoc1C(=O)Nc1ccc(N2C(=O)c3cccc(Cl)c3C2=O)nc1	6.70333	7.46005	-0.756711	CHEMBL3635102	CHEMBL3635102	TRUE
COc1ccc(-c2csc(N3N=C(c4ccc(F)cc4)CC3c3cccs3)n2)cc1	COc1ccc(-c2csc(N3N=C(c4ccc(Cl)cc4)CC3c3cccs3)n2)cc1	4.84894	5.60555	-0.756612	CHEMBL3371860	CHEMBL3371860	TRUE
COc1ccc(-c2csc(N3N=C(c4ccc(F)cc4)CC3c3cccs3)n2)cc1	COc1ccc(-c2csc(N3N=C(c4ccc(Cl)cc4)CC3c3cccs3)n2)cc1	4.84894	5.60555	-0.756612	CHEMBL3371860	CHEMBL3371860	TRUE
Cc1ccccc1-c1nn(-c2ccc(F)cc2)cc1CNCCN1CCN(C)CC1	Cc1ccccc1-c1nn(-c2ccc(Cl)cc2)cc1CNCCN1CCN(C)CC1	5.4318	6.18709	-0.755288	CHEMBL2445761	CHEMBL2445761	TRUE
O=C(Nc1ccccn1)c1cc(F)cc(Oc2cncnc2)c1	O=C(Nc1ccccn1)c1cc(Cl)cc(Oc2cncnc2)c1	7.02	7.76955	-0.749554	CHEMBL2446782	CHEMBL2446782	TRUE
CN(Cc1ccsc1)CC1CCN(CCc2ccc(F)cc2)CC1	CN(Cc1ccsc1)CC1CCN(CCc2ccc(Cl)cc2)CC1	4.77469	5.52288	-0.748188	CHEMBL5159907	CHEMBL5159907	TRUE
CC(C)n1nc(Cc2cccc(Cl)c2F)c2c(N)ncnc21	CC(C)n1nc(Cc2cccc(Cl)c2Cl)c2c(N)ncnc21	5.85387	6.60206	-0.748188	CHEMBL2330479	CHEMBL2330479	TRUE
C=CC(=O)N1CCN(c2nc(=O)n(-c3c(C)cccc3C(C)C)c3nc(-c4c(O)cccc4F)c(F)cc23)[CH](C)C1	C=CC(=O)N1CCN(c2nc(=O)n(-c3c(C)cccc3C(C)C)c3nc(-c4c(O)cccc4F)c(Cl)cc23)[CH](C)C1	7.95861	8.69897	-0.740363	CHEMBL4357260	CHEMBL4357260	TRUE
O=C(CCCCCCc1nc(-c2ccc(F)cc2)no1)C(F)(F)F	O=C(CCCCCCc1nc(-c2ccc(Cl)cc2)no1)C(F)(F)F	4	4.73236	-0.732359	CHEMBL3586880	CHEMBL3586880	TRUE
O=C(CCCCCCc1nc(-c2ccc(F)cc2)no1)C(F)(F)F	O=C(CCCCCCc1nc(-c2ccc(Cl)cc2)no1)C(F)(F)F	4	4.73236	-0.732359	CHEMBL3586880	CHEMBL3586880	TRUE
COc1ccn2c(C(C)=O)cc(C(=O)Nc3cc(F)cc(-c4cnn(C)c4)c3F)c2c1	COc1ccn2c(C(C)=O)cc(C(=O)Nc3cc(Cl)cc(-c4cnn(C)c4)c3F)c2c1	4.30103	5.03245	-0.731422	CHEMBL5156557	CHEMBL5156557	TRUE
CC(C)Nc1ccc(-c2ccn3c(CC4CC4)nnc3c2C(F)(F)F)cc1F	CC(C)Nc1ccc(-c2ccn3c(CC4CC4)nnc3c2C(F)(F)F)cc1Cl	7.02998	7.75995	-0.729971	CHEMBL4040508	CHEMBL4040508	TRUE
COc1ccc(C(C)(O)c2ncnc3cc(F)ccc23)cc1	COc1ccc(C(C)(O)c2ncnc3cc(Cl)ccc23)cc1	5.33068	6.06048	-0.729798	CHEMBL4619194	CHEMBL4619194	TRUE
C=CC(=O)N1CCN(c2nc(=O)n(-c3c(C(C)C)ccnc3C)c3nc(-c4c(O)cccc4F)c(F)cc23)[CH](C)C1	C=CC(=O)N1CCN(c2nc(=O)n(-c3c(C(C)C)ccnc3C)c3nc(-c4c(O)cccc4F)c(Cl)cc23)[CH](C)C1	7.79588	8.52288	-0.726999	CHEMBL4357260	CHEMBL4357260	TRUE
Cc1ccnc(N2CCC[CH](C(=O)NCCc3ccc(F)cc3)C2)n1	Cc1ccnc(N2CCC[CH](C(=O)NCCc3ccc(Cl)cc3)C2)n1	6.49485	7.22185	-0.726999	CHEMBL3239420	CHEMBL3239420	TRUE
O=C(O)CCc1ccc2[nH]c(-c3cccc(Cl)c3F)cc2c1	O=C(O)CCc1ccc2[nH]c(-c3cccc(Cl)c3Cl)cc2c1	7.60206	8.32057	-0.718512	CHEMBL4808633	CHEMBL4808633	TRUE
Cc1c(CC(=O)NCC2CC2)c2cc(F)ccc2n1CCN1CCOCC1	Cc1c(CC(=O)NCC2CC2)c2cc(Cl)ccc2n1CCN1CCOCC1	5.50864	6.22621	-0.717575	CHEMBL4374200	CHEMBL4374200	TRUE
Nc1ncnc2c1c(-c1ccc(F)c(Cl)c1)cn2[CH]1O[CH](CO)C[CH]1O	Nc1ncnc2c1c(-c1ccc(Cl)c(Cl)c1)cn2[CH]1O[CH](CO)C[CH]1O	6.52288	7.22915	-0.706269	CHEMBL4383194	CHEMBL4383194	TRUE
COc1cccc(NC(C(=O)c2c[nH]c3cccc(F)c23)c2ccccc2)c1	COc1cccc(NC(C(=O)c2c[nH]c3cccc(Cl)c23)c2ccccc2)c1	6.91364	7.61979	-0.706149	CHEMBL4200978	CHEMBL4200978	TRUE
CCS(=O)(=O)Nc1ccc(NC(=O)c2cc(C(F)(F)F)cc(C(F)(F)F)c2)cc1F	CCS(=O)(=O)Nc1ccc(NC(=O)c2cc(C(F)(F)F)cc(C(F)(F)F)c2)cc1Cl	5.05651	5.76195	-0.705448	CHEMBL4481933	CHEMBL4481933	TRUE
COc1ccc(Cc2ccnc(N3CCc4c(C(N)=O)cccc43)c2)cc1F	COc1ccc(Cc2ccnc(N3CCc4c(C(N)=O)cccc43)c2)cc1Cl	8.25414	8.95861	-0.704463	CHEMBL4806971	CHEMBL4806971	TRUE
CN(C/C=C/c1ccc(F)cc1)Cc1cccc2ccoc12	CN(C/C=C/c1ccc(Cl)cc1)Cc1cccc2ccoc12	7.50585	8.20761	-0.701763	CHEMBL3817517	CHEMBL3817517	TRUE
O=C1/C(=C/c2ccccc2F)CCc2ccc(O)cc21	O=C1/C(=C/c2ccccc2Cl)CCc2ccc(O)cc21	5.86967	6.56864	-0.69897	CHEMBL5106200	CHEMBL5106200	TRUE
Cc1[nH]c(C)c(-c2ccc(-c3ccc(C(F)(F)F)cc3F)nc2)c(=O)c1Cl	Cc1[nH]c(C)c(-c2ccc(-c3ccc(C(F)(F)F)cc3Cl)nc2)c(=O)c1Cl	8	8.69897	-0.69897	CHEMBL4048940	CHEMBL4048940	TRUE
COC(=O)N1CCN(C(=O)Cc2ccc(F)c(F)c2)[CH]2[CH](N3CC[CH](O)C3)CCC[CH]21	COC(=O)N1CCN(C(=O)Cc2ccc(F)c(Cl)c2)[CH]2[CH](N3CC[CH](O)C3)CCC[CH]21	7.95861	8.65758	-0.69897	CHEMBL4009152	CHEMBL4009152	TRUE
COc1cc(Nc2ncnc3cc(-c4ccc(F)cc4)sc23)cc(OC)c1OC	COc1cc(Nc2ncnc3cc(-c4ccc(Cl)cc4)sc23)cc(OC)c1OC	6.34679	7.04576	-0.69897	CHEMBL4370284	CHEMBL4370284	TRUE
CC1(C)[CH](OCc2ccc(F)cc2)CC[C]2(C)[CH]1CC[C]1(C)[CH]2C(=O)C=C2[CH]3C[C](C)(C(=O)O)CC[C]3(C)CC[C]21C	CC1(C)[CH](OCc2ccc(Cl)cc2)CC[C]2(C)[CH]1CC[C]1(C)[CH]2C(=O)C=C2[CH]3C[C](C)(C(=O)O)CC[C]3(C)CC[C]21C	4	4.69897	-0.69897	CHEMBL3636278	CHEMBL3636278	TRUE
O=C(O)c1cccc(COc2ccc(F)cc2C(F)(F)F)c1	O=C(O)c1cccc(COc2ccc(Cl)cc2C(F)(F)F)c1	6.30103	7	-0.69897	CHEMBL4808118	CHEMBL4808118	TRUE
Cc1ccoc1C(=O)Nc1ccc(N2Cc3c(F)cccc3C2=O)c(Cl)c1	Cc1ccoc1C(=O)Nc1ccc(N2Cc3c(Cl)cccc3C2=O)c(Cl)c1	6.05651	6.74999	-0.693489	CHEMBL3789901	CHEMBL3789901	TRUE
NC(=O)c1c(NC(=O)c2ccccc2Cl)sc2c1CCN(C(=S)Nc1ccccc1F)C2	NC(=O)c1c(NC(=O)c2ccccc2Cl)sc2c1CCN(C(=S)Nc1ccccc1Cl)C2	4.89997	5.59346	-0.693486	CHEMBL4344501	CHEMBL4344501	TRUE
COc1cccc(-c2cn3cc(-c4ccc(F)cc4)ccc3n2)c1	COc1cccc(-c2cn3cc(-c4ccc(Cl)cc4)ccc3n2)c1	6.45593	7.14752	-0.691588	CHEMBL4405768	CHEMBL4405768	TRUE
O=C(c1ccc(C(F)(F)F)cc1)N1CCN2C(=O)c3ccccc3C12c1ccc(F)cc1	O=C(c1ccc(C(F)(F)F)cc1)N1CCN2C(=O)c3ccccc3C12c1ccc(Cl)cc1	5	5.69	-0.69	CHEMBL3107686	CHEMBL3107686	TRUE
CS(=O)(=O)c1ccc2c(c1)CCN2c1ncnc2c(C3CCN(c4ncc(F)cn4)CC3)coc12	CS(=O)(=O)c1ccc2c(c1)CCN2c1ncnc2c(C3CCN(c4ncc(Cl)cn4)CC3)coc12	6.6968	7.37675	-0.679947	CHEMBL4056480	CHEMBL4056480	TRUE
COc1ccc(C(=O)c2ccc(F)cc2)cc1O	COc1ccc(C(=O)c2ccc(Cl)cc2)cc1O	4.69897	5.37882	-0.679854	CHEMBL5157866	CHEMBL5157866	TRUE
CC1(C)C(=O)N(c2ccc(NCCNC3CCOCC3)cc2)c2cc(Cl)ccc2-c2cc(F)cnc21	CC1(C)C(=O)N(c2ccc(NCCNC3CCOCC3)cc2)c2cc(Cl)ccc2-c2cc(Cl)cnc21	6.09691	6.76955	-0.672641	CHEMBL4620800	CHEMBL4620800	TRUE
CC(C)OC(=O)C(C)NP(=O)(OCC1OC(n2ccc(=O)[nH]c2=O)C(F)(F)C1O)Oc1ccccc1	CC(C)OC(=O)C(C)NP(=O)(OCC1OC(n2ccc(=O)[nH]c2=O)C(F)(Cl)C1O)Oc1ccccc1	6.54363	7.21467	-0.671036	CHEMBL4610250	CHEMBL4610250	TRUE
Fc1ccccc1-c1n[nH]cc1N1CCNCC1	Clc1ccccc1-c1n[nH]cc1N1CCNCC1	5.26	5.92922	-0.669224	CHEMBL4828349	CHEMBL4828349	TRUE
Cn1c(=O)c2ccc(-c3cccc(S(N)(=O)=O)c3)cc2n2nc(-c3ccc(F)cc3)cc12	Cn1c(=O)c2ccc(-c3cccc(S(N)(=O)=O)c3)cc2n2nc(-c3ccc(Cl)cc3)cc12	5.4034	6.07212	-0.668714	CHEMBL3295851	CHEMBL3295851	TRUE
Nc1ncnc2c1c(-c1ccc(F)c(F)c1)cn2[CH]1O[CH](CO)C[CH]1O	Nc1ncnc2c1c(-c1ccc(Cl)c(F)c1)cn2[CH]1O[CH](CO)C[CH]1O	6.48149	7.14874	-0.667256	CHEMBL4383194	CHEMBL4383194	TRUE
COc1cc(C(=O)NC2CC3CCCC(C2)N3CC(=O)Nc2ccccc2F)cc(OC)c1OC	COc1cc(C(=O)NC2CC3CCCC(C2)N3CC(=O)Nc2ccccc2Cl)cc(OC)c1OC	5.18709	5.85387	-0.666785	CHEMBL4611268	CHEMBL4611268	TRUE
O=C(NCCN1CCCC1)c1cc(N2CCC(N3CCOCC3)CC2)nc2ccc(F)cc12	O=C(NCCN1CCCC1)c1cc(N2CCC(N3CCOCC3)CC2)nc2ccc(Cl)cc12	6.16749	6.82391	-0.656418	CHEMBL4680973	CHEMBL4680973	TRUE
Nc1c(S(=O)(=O)[O-])cc(Nc2ccc(Oc3ccc(F)cc3)cc2)c2c1C(=O)c1ccccc1C2=O	Nc1c(S(=O)(=O)[O-])cc(Nc2ccc(Oc3ccc(Cl)cc3)cc2)c2c1C(=O)c1ccccc1C2=O	5.77211	6.42829	-0.656178	CHEMBL4011248	CHEMBL4011248	TRUE
COc1cc(C=C2C(=O)Nc3ccc(F)cc32)ccc1OCCN1CCOCC1	COc1cc(C=C2C(=O)Nc3ccc(Cl)cc32)ccc1OCCN1CCOCC1	4.69897	5.3536	-0.654626	CHEMBL4431957	CHEMBL4431957	TRUE
C[CH](NC(=O)c1c(Cc2ccc(F)cc2)sc2c1CCOC2)c1ccc(C(=O)O)cc1	C[CH](NC(=O)c1c(Cc2ccc(Cl)cc2)sc2c1CCOC2)c1ccc(C(=O)O)cc1	8.34679	9	-0.653213	CHEMBL5168387	CHEMBL5168387	TRUE
O=C[CH](C[CH]1CCNC1=O)NC(=O)[CH](CC1CCCCC1)NC(=O)OCc1cccc(F)c1	O=C[CH](C[CH]1CCNC1=O)NC(=O)[CH](CC1CCCCC1)NC(=O)OCc1cccc(Cl)c1	7.04576	7.69897	-0.653213	CHEMBL3429732	CHEMBL3429732	TRUE
CC(C)c1sc(N2CCN(C)CC2)nc1C(=O)Nc1ccccc1F	CC(C)c1sc(N2CCN(C)CC2)nc1C(=O)Nc1ccccc1Cl	6.58503	7.23657	-0.651545	CHEMBL4427276	CHEMBL4427276	TRUE
Cc1ccc(Oc2ccc(-c3ccn4c(CC5CC5)nnc4c3C)cc2F)c(C)n1	Cc1ccc(Oc2ccc(-c3ccn4c(CC5CC5)nnc4c3C)cc2Cl)c(C)n1	7.11003	7.75995	-0.649924	CHEMBL4040508	CHEMBL4040508	TRUE
CS(=O)(=O)N1CCN(C(=O)Cc2ccc(Cl)c(F)c2)[CH]2[CH](N3CC[CH](O)C3)CCC[CH]21	CS(=O)(=O)N1CCN(C(=O)Cc2ccc(Cl)c(Cl)c2)[CH]2[CH](N3CC[CH](O)C3)CCC[CH]21	8.09691	8.74473	-0.647817	CHEMBL4009152	CHEMBL4009152	TRUE
Cc1ccccc1N1C[CH](C)n2nc(COc3ccc(F)cn3)cc2C1=O	Cc1ccccc1N1C[CH](C)n2nc(COc3ccc(Cl)cn3)cc2C1=O	5	5.64207	-0.642065	CHEMBL3620961	CHEMBL3620961	TRUE
COc1ccc(C(C)(O)c2ncnc3ccc(F)cc23)cc1	COc1ccc(C(C)(O)c2ncnc3ccc(Cl)cc23)cc1	6.45593	7.09691	-0.640978	CHEMBL4619194	CHEMBL4619194	TRUE
O=C(c1ccc(OC(F)(F)F)cc1)N1CCN2C(=O)c3ccccc3C12c1ccc(F)cc1	O=C(c1ccc(OC(F)(F)F)cc1)N1CCN2C(=O)c3ccccc3C12c1ccc(Cl)cc1	5	5.63827	-0.638272	CHEMBL3107686	CHEMBL3107686	TRUE
CCS(=O)(=O)Nc1ccc(NC(=O)c2cccc(C(F)(F)F)c2)cc1F	CCS(=O)(=O)Nc1ccc(NC(=O)c2cccc(C(F)(F)F)c2)cc1Cl	4.46967	5.10735	-0.637677	CHEMBL4481933	CHEMBL4481933	TRUE
NC(=O)c1c(NC(=O)c2ccccc2F)sc2c1CCN(C(=S)Nc1ccccc1Cl)C2	NC(=O)c1c(NC(=O)c2ccccc2Cl)sc2c1CCN(C(=S)Nc1ccccc1Cl)C2	4.95585	5.59346	-0.637607	CHEMBL4344501	CHEMBL4344501	TRUE
COC(=O)N1CCN(C(=O)Cc2ccc(Cl)c(F)c2)[CH]2[CH](N3CC[CH](O)C3)CCC[CH]21	COC(=O)N1CCN(C(=O)Cc2ccc(Cl)c(Cl)c2)[CH]2[CH](N3CC[CH](O)C3)CCC[CH]21	8.40894	9.04576	-0.636822	CHEMBL4009152	CHEMBL4009152	TRUE
ON=Cc1c(Cl)ncnc1NCc1ccc(F)cc1	ON=Cc1c(Cl)ncnc1NCc1ccc(Cl)cc1	8.6073	9.24413	-0.636822	CHEMBL4340631	CHEMBL4340631	TRUE
CCN(c1ccc(F)cc1F)S(=O)(=O)c1cc(F)ccc1Cl	CCN(c1ccc(F)cc1F)S(=O)(=O)c1cc(Cl)ccc1Cl	6.65758	7.284	-0.626419	CHEMBL4827555	CHEMBL4827555	TRUE
Fc1ccc(C=Nc2nc3ccccc3s2)cc1	Clc1ccc(C=Nc2nc3ccccc3s2)cc1	5.82857	6.45223	-0.623659	CHEMBL4045523	CHEMBL4045523	TRUE
Cn1c2nc3ccccc3c-2c(NCCCN)c2cc(F)ccc21	Cn1c2nc3ccccc3c-2c(NCCCN)c2cc(Cl)ccc21	7.30452	7.92812	-0.6236	CHEMBL2327114	CHEMBL2327114	TRUE
OC[CH]1CCCN1c1nc(NCCc2ccc(F)cc2)c2ccccc2n1	OC[CH]1CCCN1c1nc(NCCc2ccc(Cl)cc2)c2ccccc2n1	5.67162	6.29243	-0.620809	CHEMBL4429041	CHEMBL4429041	TRUE
O=C(Nc1cc2c(Nc3ccc(F)c(Cl)c3)ncnc2cc1OCCCN1CCOCC1)c1cccc([N+](=O)[O-])c1F	O=C(Nc1cc2c(Nc3ccc(F)c(Cl)c3)ncnc2cc1OCCCN1CCOCC1)c1cccc([N+](=O)[O-])c1Cl	5.95861	6.57675	-0.618147	CHEMBL4721179	CHEMBL4721179	TRUE
CCN(c1ccc(F)cc1F)S(=O)(=O)c1cc(F)ccc1F	CCN(c1ccc(F)cc1F)S(=O)(=O)c1cc(Cl)ccc1F	5.46852	6.08619	-0.617665	CHEMBL4827555	CHEMBL4827555	TRUE
Cc1cc(Nc2cc(F)cc(F)c2)nc(N)n1	Cc1cc(Nc2cc(F)cc(Cl)c2)nc(N)n1	4.1549	4.76955	-0.614649	CHEMBL4037229	CHEMBL4037229	TRUE
Cc1ccc(-c2ccc(-c3nc4ccccc4c(C(=O)O)c3C)cc2)c(F)n1	Cc1ccc(-c2ccc(-c3nc4ccccc4c(C(=O)O)c3C)cc2)c(Cl)n1	4.50031	5.11351	-0.613196	CHEMBL4224225	CHEMBL4224225	TRUE
O=C(Nc1cccc(C(F)F)n1)c1cc(F)cc(Oc2cncnc2)c1	O=C(Nc1cccc(C(F)F)n1)c1cc(Cl)cc(Oc2cncnc2)c1	6.82681	7.43997	-0.61316	CHEMBL2446782	CHEMBL2446782	TRUE
Cc1c(CC(=O)O)c2cccnc2n1S(=O)(=O)c1ccc(F)c(C#N)c1	Cc1c(CC(=O)O)c2cccnc2n1S(=O)(=O)c1ccc(Cl)c(C#N)c1	6.77469	7.38722	-0.612525	CHEMBL3881173	CHEMBL3881173	TRUE
Cc1n[nH]c(C)c1S(=O)(=O)N1CCC(=C(F)c2ccc(F)cc2F)CC1	Cc1n[nH]c(C)c1S(=O)(=O)N1CCC(=C(F)c2ccc(Cl)cc2F)CC1	5.78781	6.39794	-0.610128	CHEMBL3880380	CHEMBL3880380	TRUE
COc1cc(OCc2cccc(-c3ccc(F)cn3)c2)c2cc(-c3cn4nc(OC)sc4n3)oc2c1	COc1cc(OCc2cccc(-c3ccc(Cl)cn3)c2)c2cc(-c3cn4nc(OC)sc4n3)oc2c1	8.81531	9.42022	-0.604908	CHEMBL3721050	CHEMBL3721050	TRUE
CCN(CC)c1ccc(CCNC(=O)c2cc3cc(F)ccc3[nH]2)cc1	CCN(CC)c1ccc(CCNC(=O)c2cc3cc(Cl)ccc3[nH]2)cc1	6.49757	7.10237	-0.6048	CHEMBL3406966	CHEMBL3406966	TRUE
CCN(CC)c1ccc(CCNC(=O)c2cc3cc(F)ccc3[nH]2)cc1	CCN(CC)c1ccc(CCNC(=O)c2cc3cc(Cl)ccc3[nH]2)cc1	6.49757	7.10237	-0.6048	CHEMBL3406966	CHEMBL3406966	TRUE
C[CH]1CC[CH](c2nc3cccc(F)c3c(=O)n2-c2cccnc2)N1c1nc(N)nc(N)c1C#N	C[CH]1CC[CH](c2nc3cccc(Cl)c3c(=O)n2-c2cccnc2)N1c1nc(N)nc(N)c1C#N	6.92082	7.52288	-0.60206	CHEMBL5125279	CHEMBL5125279	TRUE
COc1cc2ncnc(-c3c(-c4cccc(F)c4)[nH]c4ccccc34)c2cc1OCCCN1CCOCC1	COc1cc2ncnc(-c3c(-c4cccc(Cl)c4)[nH]c4ccccc34)c2cc1OCCCN1CCOCC1	6.09691	6.69897	-0.60206	CHEMBL4844822	CHEMBL4844822	TRUE
CC1OC2(CCN(CCc3ccccc3)CC2)CN(c2ccccc2F)C1=O	CC1OC2(CCN(CCc3ccccc3)CC2)CN(c2ccccc2Cl)C1=O	8.39794	9	-0.60206	CHEMBL4356649	CHEMBL4356649	TRUE
CN1CCN(C)/C(=N/c2cc(F)c(C#N)cc2C(=O)Nc2ccccc2)C1	CN1CCN(C)/C(=N/c2cc(Cl)c(C#N)cc2C(=O)Nc2ccccc2)C1	6.39794	7	-0.60206	CHEMBL3388462	CHEMBL3388462	TRUE
COc1cc(Sc2c(-c3ccccc3)[nH]c3cc(F)ccc23)cc(OC)c1OC	COc1cc(Sc2c(-c3ccccc3)[nH]c3cc(Cl)ccc23)cc(OC)c1OC	7.09691	7.69897	-0.60206	CHEMBL3599632	CHEMBL3599632	TRUE
Cn1c2c(c3ccccc31)CCC(=O)N(c1ccc(F)cc1)C2C(=O)NC1CCCCC1	Cn1c2c(c3ccccc31)CCC(=O)N(c1ccc(Cl)cc1)C2C(=O)NC1CCCCC1	4.31876	4.92082	-0.60206	CHEMBL3390104	CHEMBL3390104	TRUE
COc1cccc(Cc2cc(C)nn(C(C)C(=O)Nc3ccc(F)cc3)c2=O)c1	COc1cccc(Cc2cc(C)nn(C(C)C(=O)Nc3ccc(Cl)cc3)c2=O)c1	4	4.6	-0.6	CHEMBL4352682	CHEMBL4352682	TRUE
CN(Cc1c(-c2cc(F)cc(F)c2)cnc2ncn(-c3cccc(O)c3)c(=O)c12)CC1CCCN1	CN(Cc1c(-c2cc(F)cc(Cl)c2)cnc2ncn(-c3cccc(O)c3)c(=O)c12)CC1CCCN1	7	7.59998	-0.59998	CHEMBL4669860	CHEMBL4669860	TRUE
O=C(NCc1ccc(F)c(F)c1)c1nc(-c2ccc(F)cc2)[nH]c(=O)c1O	O=C(NCc1ccc(F)c(Cl)c1)c1nc(-c2ccc(F)cc2)[nH]c(=O)c1O	5.28651	5.88606	-0.599547	CHEMBL3373173	CHEMBL3373173	TRUE
O=C1/C(=C/c2cccc(F)c2)CCc2ccc(O)cc21	O=C1/C(=C/c2cccc(Cl)c2)CCc2ccc(O)cc21	6.08092	6.67778	-0.596859	CHEMBL5106200	CHEMBL5106200	TRUE
Cc1c(CCC(=O)O)ccc(OCc2c(C(F)(F)F)ccn2-c2ccc(F)cc2)c1C	Cc1c(CCC(=O)O)ccc(OCc2c(C(F)(F)F)ccn2-c2ccc(Cl)cc2)c1C	6.46092	7.05552	-0.594593	CHEMBL4188758	CHEMBL4188758	TRUE
C=CC(=O)Nc1cc(Nc2ncc3ncn(-c4ccccc4F)c3n2)c(OC)cc1N(C)CCN(C)C	C=CC(=O)Nc1cc(Nc2ncc3ncn(-c4ccccc4Cl)c3n2)c(OC)cc1N(C)CCN(C)C	5.17263	5.767	-0.594373	CHEMBL4221416	CHEMBL4221416	TRUE
COc1ccc(C(=O)Nc2ccc(OCCN(C)C)c(F)c2)c(-c2cccc(O)c2)c1O	COc1ccc(C(=O)Nc2ccc(OCCN(C)C)c(Cl)c2)c(-c2cccc(O)c2)c1O	3.4565	4.05066	-0.594156	CHEMBL3399479	CHEMBL3399479	TRUE
COc1ccc(C(=O)Nc2ccc(OCCN(C)C)c(F)c2)c(-c2cccc(O)c2)c1O	COc1ccc(C(=O)Nc2ccc(OCCN(C)C)c(Cl)c2)c(-c2cccc(O)c2)c1O	3.4565	4.05066	-0.594156	CHEMBL3399479	CHEMBL3399479	TRUE
NCCN(C(=O)c1ccc(Cl)cc1Cl)c1ccc(F)cc1	NCCN(C(=O)c1ccc(Cl)cc1Cl)c1ccc(Cl)cc1	5.91721	6.50864	-0.591424	CHEMBL4002341	CHEMBL4002341	TRUE
N#CC1=C(N)Oc2c(oc(CO)cc2=O)C12C(=O)Nc1ccc(F)cc12	N#CC1=C(N)Oc2c(oc(CO)cc2=O)C12C(=O)Nc1ccc(Cl)cc12	3.69897	4.28904	-0.590067	CHEMBL2380020	CHEMBL2380020	TRUE
Fc1cc(-c2ccn3c(CC4CC4)nnc3c2C(F)(F)F)ccc1NC1CC1	FC(F)(F)c1c(-c2ccc(NC3CC3)c(Cl)c2)ccn2c(CC3CC3)nnc12	7.51999	8.11003	-0.590033	CHEMBL4040508	CHEMBL4040508	TRUE
NCCNc1nc(-c2ccc(F)cc2)nc2ccccc12	NCCNc1nc(-c2ccc(Cl)cc2)nc2ccccc12	4.60206	5.18709	-0.585027	CHEMBL5105113	CHEMBL5105113	TRUE
O=C(NCc1cccc(F)c1)c1nc(-c2ccc(F)cc2)[nH]c(=O)c1O	O=C(NCc1cccc(Cl)c1)c1nc(-c2ccc(F)cc2)[nH]c(=O)c1O	5.1343	5.71897	-0.584663	CHEMBL3373173	CHEMBL3373173	TRUE
Cc1ccc(C(=O)N2CCN3C(=O)c4ccccc4C23c2ccc(F)cc2)cc1	Cc1ccc(C(=O)N2CCN3C(=O)c4ccccc4C23c2ccc(Cl)cc2)cc1	5	5.58	-0.58	CHEMBL3107686	CHEMBL3107686	TRUE
CC(=O)NCC1OC(n2cnc3c(N)nc(F)nc32)C(O)C1O	CC(=O)NCC1OC(n2cnc3c(N)nc(Cl)nc32)C(O)C1O	3.52288	4.10237	-0.579494	CHEMBL3999945	CHEMBL3999945	TRUE
CCS(=O)(=O)Nc1ccc(NC(=O)c2ccc(Cl)c([N+](=O)[O-])c2)cc1F	CCS(=O)(=O)Nc1ccc(NC(=O)c2ccc(Cl)c([N+](=O)[O-])c2)cc1Cl	5.07624	5.65561	-0.57937	CHEMBL4481933	CHEMBL4481933	TRUE
O=C(c1ccc(-c2cc(Nc3ccccc3Cl)ncn2)cc1)N1CCN(C(=O)c2ccccc2F)CC1	O=C(c1ccc(-c2cc(Nc3ccccc3Cl)ncn2)cc1)N1CCN(C(=O)c2ccccc2Cl)CC1	4.09313	4.66959	-0.57646	CHEMBL3379075	CHEMBL3379075	TRUE
CCOC(=O)C1=C(N)Oc2c(oc(CO)cc2=O)C12C(=O)Nc1ccc(F)cc12	CCOC(=O)C1=C(N)Oc2c(oc(CO)cc2=O)C12C(=O)Nc1ccc(Cl)cc12	3.69897	4.27491	-0.575935	CHEMBL2380020	CHEMBL2380020	TRUE
Cc1ccc(C(=O)NCc2cccnc2)cc1NS(=O)(=O)c1ccc(F)cc1	Cc1ccc(C(=O)NCc2cccnc2)cc1NS(=O)(=O)c1ccc(Cl)cc1	5.45593	6.03152	-0.575585	CHEMBL5154328	CHEMBL5154328	TRUE
C=C[CH]1C[C]1(NC(=O)[CH]1C[CH](Oc2nccc3c(F)cccc23)CN1C(=O)[CH](NC(=O)OC(C)(C)C)C(C)(C)C)C(=O)NS(=O)(=O)C1CC1	C=C[CH]1C[C]1(NC(=O)[CH]1C[CH](Oc2nccc3c(Cl)cccc23)CN1C(=O)[CH](NC(=O)OC(C)(C)C)C(C)(C)C)C(=O)NS(=O)(=O)C1CC1	7.02687	7.60206	-0.575188	CHEMBL3128634	CHEMBL3128634	TRUE
COc1ccc(-c2cc(=O)oc3ccc(F)cc23)cc1O	COc1ccc(-c2cc(=O)oc3ccc(Cl)cc23)cc1O	5.82391	6.39794	-0.574031	CHEMBL4002263	CHEMBL4002263	TRUE
O=C(N1CCN(c2ncnc3[nH]nc(Br)c23)CC1)C1(c2ccc(F)cc2)CCNCC1	O=C(N1CCN(c2ncnc3[nH]nc(Br)c23)CC1)C1(c2ccc(Cl)cc2)CCNCC1	4.43652	5.00877	-0.572255	CHEMBL4259696	CHEMBL4259696	TRUE
CN(C)CCNc1cc(/C=C/c2cccs2)nc2ccc(F)cc12	CN(C)CCNc1cc(/C=C/c2cccs2)nc2ccc(Cl)cc12	6.95507	7.52724	-0.572175	CHEMBL4671338	CHEMBL4671338	TRUE
O=C(O)C1CN(Cc2ccc(OCc3cccc(C(F)(F)F)c3)c(F)c2)C1	O=C(O)C1CN(Cc2ccc(OCc3cccc(C(F)(F)F)c3)c(Cl)c2)C1	6.39686	6.96257	-0.565718	CHEMBL3744617	CHEMBL3744617	TRUE
CCOC(=O)c1sc(NC(=O)Cn2cc(-c3ccc(F)cc3)nn2)nc1C	CCOC(=O)c1sc(NC(=O)Cn2cc(-c3ccc(Cl)cc3)nn2)nc1C	6.18046	6.74473	-0.564271	CHEMBL4305726	CHEMBL4305726	TRUE
CN1CCN(c2ccc(S(=O)(=O)Oc3cccc(F)c3)cc2)C1=O	CN1CCN(c2ccc(S(=O)(=O)Oc3cccc(Cl)c3)cc2)C1=O	5.23657	5.79588	-0.559308	CHEMBL4016264	CHEMBL4016264	TRUE
Cc1c2c(nn1CC(=O)NCc1ccccc1F)-c1ccccc1S(=O)(=O)N2C	Cc1c2c(nn1CC(=O)NCc1ccccc1Cl)-c1ccccc1S(=O)(=O)N2C	4.24033	4.7986	-0.558271	CHEMBL3405885	CHEMBL3405885	TRUE
Cc1n[nH]c(C)c1S(=O)(=O)N1CCC(=C(F)c2ccc(F)c(Cl)c2)CC1	Cc1n[nH]c(C)c1S(=O)(=O)N1CCC(=C(F)c2ccc(Cl)c(Cl)c2)CC1	5.72584	6.284	-0.558155	CHEMBL3880380	CHEMBL3880380	TRUE
COc1ccc(CC2COC(=O)C2Cc2ccc(F)cc2)cc1OC	COc1ccc(CC2COC(=O)C2Cc2ccc(Cl)cc2)cc1OC	5.08092	5.63827	-0.55735	CHEMBL4623565	CHEMBL4623565	TRUE
Nc1nc2cc(O[CH]3CC[C]4(O)[CH]3O[CH](n3ccc5c(N)ncnc53)[CH]4O)ccc2cc1F	Nc1nc2cc(O[CH]3CC[C]4(O)[CH]3O[CH](n3ccc5c(N)ncnc53)[CH]4O)ccc2cc1Cl	7.56864	8.12494	-0.556303	CHEMBL4808436	CHEMBL4808436	TRUE
CCNc1ccc2c(=O)c3cccc(F)c3oc2c1	CCNc1ccc2c(=O)c3cccc(Cl)c3oc2c1	6.21467	6.76955	-0.554881	CHEMBL5142775	CHEMBL5142775	TRUE
Fc1cccc(-c2n[nH]cc2N2CCCNCC2)c1	Clc1cccc(-c2n[nH]cc2N2CCCNCC2)c1	5.61172	6.16368	-0.551955	CHEMBL4828349	CHEMBL4828349	TRUE
CCC(=C(c1ccc(C=CC(=O)O)cc1)c1cc2ccccc2[nH]1)c1ccc(F)cc1Cl	CCC(=C(c1ccc(C=CC(=O)O)cc1)c1cc2ccccc2[nH]1)c1ccc(Cl)cc1Cl	7.40894	7.95861	-0.549672	CHEMBL4703593	CHEMBL4703593	TRUE
Cn1c2c(c3ccccc31)CCC(=O)N(c1ccc(F)cc1)C2C(=O)NC(C)(C)C	Cn1c2c(c3ccccc31)CCC(=O)N(c1ccc(Cl)cc1)C2C(=O)NC(C)(C)C	4.33724	4.88606	-0.548814	CHEMBL3390104	CHEMBL3390104	TRUE
O=C1N/C(=N\c2nnc(-c3ccc(F)cc3)s2)S/C1=C\c1c(Cl)cccc1Cl	O=C1N/C(=N\c2nnc(-c3ccc(Cl)cc3)s2)S/C1=C\c1c(Cl)cccc1Cl	4.70333	5.25181	-0.548477	CHEMBL5109345	CHEMBL5109345	TRUE
Cc1ncc(Cn2cc(CSc3nnc(-c4ccccc4F)o3)nn2)c(N)n1	Cc1ncc(Cn2cc(CSc3nnc(-c4ccccc4Cl)o3)nn2)c(N)n1	5.0942	5.64207	-0.547861	CHEMBL3779025	CHEMBL3779025	TRUE
O=C(N[CH](CC1CCCCC1)C(=O)N[CH](C[CH]1CCNC1=O)C(=O)C(=O)NC1CC1)OCc1cccc(F)c1	O=C(N[CH](CC1CCCCC1)C(=O)N[CH](C[CH]1CCNC1=O)C(=O)C(=O)NC1CC1)OCc1cccc(Cl)c1	6.52288	7.07058	-0.547702	CHEMBL3429732	CHEMBL3429732	TRUE
CC1=CCC2C(OC(c3ccc(F)cc3)CC2(C)F)C1O	CC1=CCC2C(OC(c3ccc(Cl)cc3)CC2(C)F)C1O	3.46852	4.01323	-0.544707	CHEMBL3860882	CHEMBL3860882	TRUE
O=C(O)CCc1ccc(OCc2coc(-c3cccc(F)c3)n2)cc1	O=C(O)CCc1ccc(OCc2coc(-c3cccc(Cl)c3)n2)cc1	6.25181	6.79588	-0.544068	CHEMBL3602370	CHEMBL3602370	TRUE
COc1cccc(NC(C(=O)c2c[nH]c3cc(F)ccc23)c2ccccc2)c1	COc1cccc(NC(C(=O)c2c[nH]c3cc(Cl)ccc23)c2ccccc2)c1	7.34679	7.88606	-0.539269	CHEMBL4200978	CHEMBL4200978	TRUE
CC1(COc2ccc(F)cc2)CCn2cc([N+](=O)[O-])nc2O1	CC1(COc2ccc(Cl)cc2)CCn2cc([N+](=O)[O-])nc2O1	6.34679	6.88606	-0.539269	CHEMBL4679936	CHEMBL4679936	TRUE
CN(Cc1ccsc1)CC1CCN(CCc2cccc(F)c2)CC1	CN(Cc1ccsc1)CC1CCN(CCc2cccc(Cl)c2)CC1	5.16115	5.69897	-0.537819	CHEMBL5159907	CHEMBL5159907	TRUE
Oc1cccc(-c2cc(-c3ccc(F)cc3)nc3c2Cc2cc(O)ccc2-3)c1	Oc1cccc(-c2cc(-c3ccc(Cl)cc3)nc3c2Cc2cc(O)ccc2-3)c1	5.42713	5.96257	-0.535445	CHEMBL4375833	CHEMBL4375833	TRUE
C=C1CC[CH]2[CH](/C=C(\C)C(=O)[C]3(O)C[CH](C)[CH](O)[CH]3[CH]1OC(=O)c1cn(CC)nc1-c1ccc(F)cc1)C2(C)C	C=C1CC[CH]2[CH](/C=C(\C)C(=O)[C]3(O)C[CH](C)[CH](O)[CH]3[CH]1OC(=O)c1cn(CC)nc1-c1ccc(Cl)cc1)C2(C)C	4.69897	5.23359	-0.534617	CHEMBL5157857	CHEMBL5157857	TRUE
Cc1c(CC(=O)NC2CC2)c2cc(F)ccc2n1CCN1CCOCC1	Cc1c(CC(=O)NC2CC2)c2cc(Cl)ccc2n1CCN1CCOCC1	5.38722	5.92082	-0.533603	CHEMBL4374200	CHEMBL4374200	TRUE
O=C1CNc2nc(Nc3ccc(F)cc3)ncc2N1	O=C1CNc2nc(Nc3ccc(Cl)cc3)ncc2N1	4	4.53284	-0.532836	CHEMBL4058570	CHEMBL4058570	TRUE
CCn1ncc2c(F)cc(C(=O)Nc3nnc(C4CC4)s3)cc21	CCn1ncc2c(Cl)cc(C(=O)Nc3nnc(C4CC4)s3)cc21	7.20971	7.74232	-0.532607	CHEMBL3802312	CHEMBL3802312	TRUE
Cc1cc(C#N)cc(C)c1Nc1ccc(F)c(Nc2ccc(F)cc2)n1	Cc1cc(C#N)cc(C)c1Nc1ccc(F)c(Nc2ccc(Cl)cc2)n1	7.29243	7.82391	-0.531479	CHEMBL3788480	CHEMBL3788480	TRUE
Oc1cc2c(cc1O)C(c1ccccc1)N(C(=S)NCCc1ccc(F)cc1)CC2	Oc1cc2c(cc1O)C(c1ccccc1)N(C(=S)NCCc1ccc(Cl)cc1)CC2	4.76955	5.30103	-0.531479	CHEMBL4372565	CHEMBL4372565	TRUE
C[CH]1CN(c2ccc(F)cc2)C(=O)c2cc(COc3ccc(F)cn3)nn21	C[CH]1CN(c2ccc(F)cc2)C(=O)c2cc(COc3ccc(Cl)cn3)nn21	5	5.53	-0.53	CHEMBL3620961	CHEMBL3620961	TRUE
NCCN(C(=O)c1cccc(F)c1)c1ccc(Cl)cc1	NCCN(C(=O)c1cccc(Cl)c1)c1ccc(Cl)cc1	5.39469	5.92082	-0.526124	CHEMBL4002341	CHEMBL4002341	TRUE
CCN(Cc1ccccc1F)C(=O)C1CCN(S(=O)(=O)c2ccc3cn[nH]c3c2)CC1	CCN(Cc1ccccc1Cl)C(=O)C1CCN(S(=O)(=O)c2ccc3cn[nH]c3c2)CC1	5.67	6.19382	-0.52382	CHEMBL3370062	CHEMBL3370062	TRUE
O=C(Nc1ncc(-c2ccccc2)o1)c1ccc(F)cc1	O=C(Nc1ncc(-c2ccccc2)o1)c1ccc(Cl)cc1	5.95861	6.48149	-0.522879	CHEMBL5117906	CHEMBL5117906	TRUE
Cc1ncnc2c1ccn2[CH]1O[CH]2[CH](Cc3ccc4cc(F)c(N)nc4c3)CC[C]2(O)[CH]1O	Cc1ncnc2c1ccn2[CH]1O[CH]2[CH](Cc3ccc4cc(Cl)c(N)nc4c3)CC[C]2(O)[CH]1O	7.63827	8.16115	-0.522879	CHEMBL4808436	CHEMBL4808436	TRUE
COc1cc(C(=O)c2c(-c3ccccc3)[nH]c3c(F)cccc23)cc(OC)c1OC	COc1cc(C(=O)c2c(-c3ccccc3)[nH]c3c(Cl)cccc23)cc(OC)c1OC	7.52288	8.04576	-0.522879	CHEMBL3599632	CHEMBL3599632	TRUE
O=C(Nc1nc2ccc(F)cc2s1)N(CCC(c1ccccc1)c1ccccc1)CCN1CCOCC1	O=C(Nc1nc2ccc(Cl)cc2s1)N(CCC(c1ccccc1)c1ccccc1)CCN1CCOCC1	6.69897	7.22185	-0.522879	CHEMBL2378664	CHEMBL2378664	TRUE
CCCC[CH](NC(C)=O)C(=O)N[CH]1CC(=O)NCCCC[CH](C(N)=O)NC(=O)[CH](Cc2c[nH]c3c(F)cccc23)NC(=O)[CH](CCCNC(=N)N)NC(=O)[CH](Cc2ccc3ccccc3c2)NC(=O)[CH](Cc2cnc[nH]2)NC1=O	CCCC[CH](NC(C)=O)C(=O)N[CH]1CC(=O)NCCCC[CH](C(N)=O)NC(=O)[CH](Cc2c[nH]c3c(Cl)cccc23)NC(=O)[CH](CCCNC(=N)N)NC(=O)[CH](Cc2ccc3ccccc3c2)NC(=O)[CH](Cc2cnc[nH]2)NC1=O	6.57001	7.09151	-0.521509	CHEMBL4775170	CHEMBL4775170	TRUE
Cc1ccc(Oc2ccc(-c3ccn4c(CC5CC5)nnc4c3Cl)cc2F)c(C)n1	Cc1ccc(Oc2ccc(-c3ccn4c(CC5CC5)nnc4c3Cl)cc2Cl)c(C)n1	7.38998	7.91009	-0.520116	CHEMBL4040508	CHEMBL4040508	TRUE
Cc1c(-c2ccc(-c3cccnc3F)cc2)nc2ccccc2c1C(=O)O	Cc1c(-c2ccc(-c3cccnc3Cl)cc2)nc2ccccc2c1C(=O)O	4.67162	5.19111	-0.519494	CHEMBL4224226	CHEMBL4224226	TRUE
Cc1c(-c2ccc(-c3cccnc3F)cc2)nc2ccc(F)cc2c1C(=O)O	Cc1c(-c2ccc(-c3cccnc3Cl)cc2)nc2ccc(F)cc2c1C(=O)O	4.62709	5.14388	-0.516788	CHEMBL4224225	CHEMBL4224225	TRUE
CS(=O)(=O)N1CCN(C(=O)Cc2ccc(F)c(Cl)c2)[CH]2[CH](N3CC[CH](O)C3)CCC[CH]21	CS(=O)(=O)N1CCN(C(=O)Cc2ccc(Cl)c(Cl)c2)[CH]2[CH](N3CC[CH](O)C3)CCC[CH]21	8.22915	8.74473	-0.51558	CHEMBL4009152	CHEMBL4009152	TRUE
NS(=O)(=O)Oc1ccc(C(=O)NC23CC4CC(CC(C4)C2)C3)cc1F	NS(=O)(=O)Oc1ccc(C(=O)NC23CC4CC(CC(C4)C2)C3)cc1Cl	5.46852	5.98297	-0.514446	CHEMBL4617988	CHEMBL4617988	TRUE
CCS(=O)(=O)Nc1ccc(NC(=O)c2ccc(Cl)cc2)cc1F	CCS(=O)(=O)Nc1ccc(NC(=O)c2ccc(Cl)cc2)cc1Cl	4.20412	4.71851	-0.514392	CHEMBL4481933	CHEMBL4481933	TRUE
CN(Cc1ccsc1)CC1CCN(Cc2ccccc2F)CC1	CN(Cc1ccsc1)CC1CCN(Cc2ccccc2Cl)CC1	5.05552	5.56864	-0.513119	CHEMBL5159907	CHEMBL5159907	TRUE
COP(=O)(Nc1cc(-c2ccc(F)cc2)sc1C(=O)O)c1ccc(C)cc1C	COP(=O)(Nc1cc(-c2ccc(Cl)cc2)sc1C(=O)O)c1ccc(C)cc1C	5.66959	6.18046	-0.51087	CHEMBL4432407	CHEMBL4432407	TRUE
O=C(Nc1cccc(Cl)n1)c1cc(F)cc(Oc2cncnc2)c1	O=C(Nc1cccc(Cl)n1)c1cc(Cl)cc(Oc2cncnc2)c1	7.34998	7.86012	-0.510137	CHEMBL2446782	CHEMBL2446782	TRUE
Cn1c(=O)c(F)cn(Cc2ccccc2OCC(=O)Nc2ccccc2Cl)c1=O	Cn1c(=O)c(Cl)cn(Cc2ccccc2OCC(=O)Nc2ccccc2Cl)c1=O	4.51884	5.02826	-0.509416	CHEMBL3399537	CHEMBL3399537	TRUE
Cn1c(=O)c(F)cn(Cc2ccccc2OCC(=O)Nc2ccccc2Cl)c1=O	Cn1c(=O)c(Cl)cn(Cc2ccccc2OCC(=O)Nc2ccccc2Cl)c1=O	4.51884	5.02826	-0.509416	CHEMBL3399537	CHEMBL3399537	TRUE
CC1(CNc2ccc(F)cc2)CCn2cc([N+](=O)[O-])nc2O1	CC1(CNc2ccc(Cl)cc2)CCn2cc([N+](=O)[O-])nc2O1	6.03152	6.5376	-0.506085	CHEMBL4679936	CHEMBL4679936	TRUE
Nc1nc(-c2ccc(F)cc2)cc(-c2ccc(C3NC(=O)c4ccccc4N3)cc2)n1	Nc1nc(-c2ccc(Cl)cc2)cc(-c2ccc(C3NC(=O)c4ccccc4N3)cc2)n1	5.00745	5.51286	-0.505415	CHEMBL2383147	CHEMBL2383147	TRUE
Cc1cc(F)cc(N2C=Nc3cc(C)c(-c4cccc(O)c4)cc3C2C(=O)N(C)CC2CCCN2)c1	Cc1cc(Cl)cc(N2C=Nc3cc(C)c(-c4cccc(O)c4)cc3C2C(=O)N(C)CC2CCCN2)c1	9	9.50004	-0.500038	CHEMBL4669432	CHEMBL4669432	TRUE
O=C(Nc1cncc(Oc2cncc(F)c2)n1)c1cc(F)cc(F)c1	O=C(Nc1cncc(Oc2cncc(F)c2)n1)c1cc(F)cc(Cl)c1	4.5	5	-0.5	CHEMBL3363386	CHEMBL3363386	TRUE
COc1cc(N2C(=O)CN(Cc3ccc(F)cc3F)C2=S)ccc1N(C)C	COc1cc(N2C(=O)CN(Cc3ccc(F)cc3Cl)C2=S)ccc1N(C)C	8.22185	8.72125	-0.499398	CHEMBL4193895	CHEMBL4193895	TRUE
O=S(=O)(c1cccc(F)c1)c1nnn2c1nc(N1CCOCC1)c1sccc12	O=S(=O)(c1cccc(Cl)c1)c1nnn2c1nc(N1CCOCC1)c1sccc12	6.07058	6.56864	-0.498055	CHEMBL2317095	CHEMBL2317095	TRUE
O=C(O)c1ccc(CNC(=O)c2cc(F)ccc2Oc2ccc(F)cc2)cc1	O=C(O)c1ccc(CNC(=O)c2cc(Cl)ccc2Oc2ccc(F)cc2)cc1	6.49894	6.99568	-0.496738	CHEMBL3997107	CHEMBL3997107	TRUE
O=C(O)[C]1(Cc2cccc(Nc3nccs3)n2)CC[CH](Oc2cccc(F)c2F)CC1	O=C(O)[C]1(Cc2cccc(Nc3nccs3)n2)CC[CH](Oc2cccc(Cl)c2F)CC1	5.4034	5.89963	-0.496227	CHEMBL3882308	CHEMBL3882308	TRUE
Cc1c(-c2ccc(-c3cccnc3F)cc2)nc2ccc(Cl)cc2c1C(=O)O	Cc1c(-c2ccc(-c3cccnc3Cl)cc2)nc2ccc(Cl)cc2c1C(=O)O	4.83268	5.32514	-0.492456	CHEMBL4224225	CHEMBL4224225	TRUE
OCC1CCCCN1c1nc(NCCc2ccccc2F)c2ccccc2n1	OCC1CCCCN1c1nc(NCCc2ccccc2Cl)c2ccccc2n1	5.83565	6.3279	-0.492255	CHEMBL4429041	CHEMBL4429041	TRUE
CC(C)OC(=O)[CH](C)NP(=O)(OC[C]1(F)O[CH](n2ccc(=O)[nH]c2=O)[C](C)(F)[CH]1O)Oc1ccccc1	CC(C)OC(=O)[CH](C)NP(=O)(OC[C]1(F)O[CH](n2ccc(=O)[nH]c2=O)[C](C)(Cl)[CH]1O)Oc1ccccc1	6.50864	7	-0.491362	CHEMBL4394400	CHEMBL4394400	TRUE
Fc1ccc(-c2n[nH]cc2N2CCCNCC2)cc1	Clc1ccc(-c2n[nH]cc2N2CCCNCC2)cc1	5.1399	5.63	-0.490098	CHEMBL4828349	CHEMBL4828349	TRUE
COc1ccc(F)cc1[CH]1C[CH]1CNCc1ccccc1F	COc1ccc(F)cc1[CH]1C[CH]1CNCc1ccccc1Cl	5.79	6.28	-0.489998	CHEMBL4013756	CHEMBL4013756	TRUE
Cc1cc(Nc2cc(F)cc(Cl)c2)nc(N)n1	Cc1cc(Nc2cc(Cl)cc(Cl)c2)nc(N)n1	4.76955	5.25181	-0.482261	CHEMBL4037229	CHEMBL4037229	TRUE
C=C(C(=O)OC)C(O)c1ccc(F)cc1	C=C(C(=O)OC)C(O)c1ccc(Cl)cc1	3.21467	3.69514	-0.480473	CHEMBL4432403	CHEMBL4432403	TRUE
O=C(Nc1nc2ccc(F)cc2s1)c1cc(-c2ccc(F)cc2)n2nc(-c3ccccc3)cc2n1	O=C(Nc1nc2ccc(Cl)cc2s1)c1cc(-c2ccc(F)cc2)n2nc(-c3ccccc3)cc2n1	4.53003	5.01011	-0.480075	CHEMBL2388122	CHEMBL2388122	TRUE
Cc1ccc(Oc2ccc(-c3ccn4c(CC5CC5)nnc4c3C(F)(F)F)cc2F)c(C)n1	Cc1ccc(Oc2ccc(-c3ccn4c(CC5CC5)nnc4c3C(F)(F)F)cc2Cl)c(C)n1	8.05998	8.54	-0.480023	CHEMBL4040508	CHEMBL4040508	TRUE
Cn1c(-c2ccccc2)cnc1NC(=O)c1ccc(F)cc1	Cn1c(-c2ccccc2)cnc1NC(=O)c1ccc(Cl)cc1	4.4437	4.92082	-0.477121	CHEMBL5117906	CHEMBL5117906	TRUE
CCOc1nc(NC(=O)C(C)(C)NC(=O)c2ccc3c(C4CCCC4)c(-c4ccc(F)cn4)n(C)c3c2)cnc1C=CC(=O)O	CCOc1nc(NC(=O)C(C)(C)NC(=O)c2ccc3c(C4CCCC4)c(-c4ccc(Cl)cn4)n(C)c3c2)cnc1C=CC(=O)O	7.74473	8.22185	-0.477121	CHEMBL3412083	CHEMBL3412083	TRUE
CCCS(=O)(=O)Nc1ccc(F)c(-c2cc3cnc4[nH]ncc4c3cc2OC)c1F	CCCS(=O)(=O)Nc1ccc(F)c(-c2cc3cnc4[nH]ncc4c3cc2OC)c1Cl	6.86012	7.3279	-0.467781	CHEMBL3755450	CHEMBL3755450	TRUE
CCCc1csc(NC(=O)c2cc(F)cc(Oc3cncnc3)c2)n1	CCCc1csc(NC(=O)c2cc(Cl)cc(Oc3cncnc3)c2)n1	6.62001	7.08619	-0.46618	CHEMBL2446782	CHEMBL2446782	TRUE
C=CC(=O)Nc1cccc(CNc2nc(Nc3ccc(N4CCN(C)CC4)cc3OC)ncc2F)c1	C=CC(=O)Nc1cccc(CNc2nc(Nc3ccc(N4CCN(C)CC4)cc3OC)ncc2Cl)c1	5.0511	5.51613	-0.465029	CHEMBL3603331	CHEMBL3603331	TRUE
Cc1ccc(S(=O)(=O)N2CCc3cc(C(=O)NCCN(Cc4ccc(F)cc4)C(C)C)ccc3C2)cc1	Cc1ccc(S(=O)(=O)N2CCc3cc(C(=O)NCCN(Cc4ccc(Cl)cc4)C(C)C)ccc3C2)cc1	7.53611	8	-0.463893	CHEMBL3590953	CHEMBL3590953	TRUE
Cc1ccc(S(=O)(=O)N2CCc3cc(C(=O)NCCN(Cc4ccc(F)cc4)C(C)C)ccc3C2)cc1	Cc1ccc(S(=O)(=O)N2CCc3cc(C(=O)NCCN(Cc4ccc(Cl)cc4)C(C)C)ccc3C2)cc1	7.53611	8	-0.463893	CHEMBL3590953	CHEMBL3590953	TRUE
Cc1nn2c(-c3nc4cc(F)ccc4[nH]3)c(-c3ccccc3)nc2s1	Cc1nn2c(-c3nc4cc(Cl)ccc4[nH]3)c(-c3ccccc3)nc2s1	4.8041	5.26761	-0.463506	CHEMBL3627178	CHEMBL3627178	TRUE
CCCOc1ccc(F)cc1[CH]1C[CH]1CN	CCCOc1ccc(Cl)cc1[CH]1C[CH]1CN	6.52871	6.98716	-0.458454	CHEMBL3419954	CHEMBL3419954	TRUE
CN1CCN(Cc2ccc(NC(=O)Nc3ccc4ncnc(Nc5ccc(F)c(F)c5)c4c3)cc2)CC1	CN1CCN(Cc2ccc(NC(=O)Nc3ccc4ncnc(Nc5ccc(F)c(Cl)c5)c4c3)cc2)CC1	5	5.45842	-0.458421	CHEMBL3745458	CHEMBL3745458	TRUE
COc1cc2nccc(Oc3ccc(NC(=O)c4cnc(Cl)cc4Nc4ccc(F)cc4)cc3)c2cc1OC	COc1cc2nccc(Oc3ccc(NC(=O)c4cnc(Cl)cc4Nc4ccc(Cl)cc4)cc3)c2cc1OC	5.16622	5.62342	-0.457207	CHEMBL4387127	CHEMBL4387127	TRUE
O=C(C[CH](CC1CCCC1)C(=O)N1CC2(CC2)C[CH]1c1nc(-c2ccc(C(F)(F)F)cc2F)no1)NO	O=C(C[CH](CC1CCCC1)C(=O)N1CC2(CC2)C[CH]1c1nc(-c2ccc(C(F)(F)F)cc2Cl)no1)NO	5	5.45717	-0.457175	CHEMBL4619396	CHEMBL4619396	TRUE
OCCN1CCN(c2nc(Nc3ccc(F)cc3)c3ccccc3n2)CC1	OCCN1CCN(c2nc(Nc3ccc(Cl)cc3)c3ccccc3n2)CC1	4.67244	5.12901	-0.456574	CHEMBL3610647	CHEMBL3610647	TRUE
Cc1ccnc(NC(c2ccc3cccnc3c2O)c2c(F)cccc2Cl)c1	Cc1ccnc(NC(c2ccc3cccnc3c2O)c2c(Cl)cccc2Cl)c1	4.68613	5.14267	-0.456535	CHEMBL4729814	CHEMBL4729814	TRUE
O=C(Nc1ccc(F)c(-c2nc3cc(F)cnc3[nH]2)c1)c1ccco1	O=C(Nc1ccc(F)c(-c2nc3cc(Cl)cnc3[nH]2)c1)c1ccco1	6.69897	7.1549	-0.455932	CHEMBL3119135	CHEMBL3119135	TRUE
CN(C)c1ccc(/C=C/c2c(F)cccc2F)nc1	CN(C)c1ccc(/C=C/c2c(F)cccc2Cl)nc1	7.23732	7.69037	-0.453048	CHEMBL3378078	CHEMBL3378078	TRUE
O=C(Nc1ccc(NCc2ccc(F)cc2)cc1Cl)c1cc(Cl)ccc1O	O=C(Nc1ccc(NCc2ccc(Cl)cc2)cc1Cl)c1cc(Cl)ccc1O	5.46852	5.92082	-0.452298	CHEMBL4704510	CHEMBL4704510	TRUE
CN(C)c1ccc(/C=C/c2c(F)cccc2F)cn1	CN(C)c1ccc(/C=C/c2c(F)cccc2Cl)cn1	7.87615	8.3279	-0.451754	CHEMBL3378078	CHEMBL3378078	TRUE
Cn1cc(C=C2C(=O)Nc3ccccc32)c2cc(Nc3nccc(-c4ccc(F)cc4)n3)ccc21	Cn1cc(C=C2C(=O)Nc3ccccc32)c2cc(Nc3nccc(-c4ccc(Cl)cc4)n3)ccc21	4.78463	5.23508	-0.45045	CHEMBL3813411	CHEMBL3813411	TRUE
O=C1C(=O)N(CC(CO)N[CH]2C(=O)N(c3ccc(Cl)cc3)[CH]2/C=C/c2ccccc2)c2ccc(F)cc21	O=C1C(=O)N(CC(CO)N[CH]2C(=O)N(c3ccc(Cl)cc3)[CH]2/C=C/c2ccccc2)c2ccc(Cl)cc21	4.56146	5.01189	-0.45043	CHEMBL3226283	CHEMBL3226283	TRUE
COC(=O)N1CCN(C(=O)Cc2ccc(F)c(F)c2)[CH]2[CH](N3CC[CH](O)C3)CCC[CH]21	COC(=O)N1CCN(C(=O)Cc2ccc(Cl)c(F)c2)[CH]2[CH](N3CC[CH](O)C3)CCC[CH]21	7.95861	8.40894	-0.450328	CHEMBL4009152	CHEMBL4009152	TRUE
O=c1c(O)c(-c2ccc(O)c(O)c2)oc2c(CNCc3cccc(F)c3)c(O)cc(O)c12	O=c1c(O)c(-c2ccc(O)c(O)c2)oc2c(CNCc3cccc(Cl)c3)c(O)cc(O)c12	6.20761	6.65758	-0.449969	CHEMBL3376036	CHEMBL3376036	TRUE
NC(=S)NN=CCSc1ccc(F)cc1	NC(=S)NN=CCSc1ccc(Cl)cc1	5.22988	5.67985	-0.449969	CHEMBL3790032	CHEMBL3790032	TRUE
NS(=O)(=O)c1ccc(-n2c(SCC(=O)Nc3ccc(F)cc3)nc3c(I)cc(I)cc3c2=O)cc1	NS(=O)(=O)c1ccc(-n2c(SCC(=O)Nc3ccc(Cl)cc3)nc3c(I)cc(I)cc3c2=O)cc1	3.80184	4.24803	-0.44619	CHEMBL4821288	CHEMBL4821288	TRUE
O=C(NCC12CC(CN1Cc1ccccc1)C2)c1ccc(Br)c(F)c1	O=C(NCC12CC(CN1Cc1ccccc1)C2)c1ccc(Br)c(Cl)c1	5	5.4437	-0.443697	CHEMBL4731972	CHEMBL4731972	TRUE
O=C(Cc1ccc(O)c(F)c1)N1CC(CNc2ccc(F)cc2)C2(C1)CN(c1ccc(F)cc1)C2	O=C(Cc1ccc(O)c(Cl)c1)N1CC(CNc2ccc(F)cc2)C2(C1)CN(c1ccc(F)cc1)C2	6.4437	6.88606	-0.442359	CHEMBL4737829	CHEMBL4737829	TRUE
NCCCCNc1nc(-c2ccc(F)cc2)nc2ccccc12	NCCCCNc1nc(-c2ccc(Cl)cc2)nc2ccccc12	4.48812	4.92082	-0.432702	CHEMBL5105113	CHEMBL5105113	TRUE
CC(NS(=O)(=O)c1ccc(-c2c(C#N)c3cc(F)cnc3n2C2CCC2)nc1)C(F)(F)F	CC(NS(=O)(=O)c1ccc(-c2c(C#N)c3cc(Cl)cnc3n2C2CCC2)nc1)C(F)(F)F	7.33724	7.76955	-0.432309	CHEMBL3396886	CHEMBL3396886	TRUE
C=CC(=O)Nc1cccc(Nc2nc(Nc3ccc(OCCCP(=O)(OCC)OCC)cc3)ncc2F)c1	C=CC(=O)Nc1cccc(Nc2nc(Nc3ccc(OCCCP(=O)(OCC)OCC)cc3)ncc2Cl)c1	4.78516	5.21681	-0.431655	CHEMBL3874810	CHEMBL3874810	TRUE
O=C(c1ccc(Cl)c([N+](=O)[O-])c1)N1CCN(c2ccccc2F)CC1	O=C(c1ccc(Cl)c([N+](=O)[O-])c1)N1CCN(c2ccccc2Cl)CC1	5.10023	5.53062	-0.430386	CHEMBL4705347	CHEMBL4705347	TRUE
O=C(NCCc1cccc(F)c1)Nc1ccc(Cl)cc1	O=C(NCCc1cccc(Cl)c1)Nc1ccc(Cl)cc1	5.82	6.25	-0.430001	CHEMBL5043705	CHEMBL5043705	TRUE
CN(C(=O)c1ccc(F)cc1)c1ccc2[nH]c(-c3n[nH]c4ccccc34)cc2n1	CN(C(=O)c1ccc(Cl)cc1)c1ccc2[nH]c(-c3n[nH]c4ccccc34)cc2n1	5.91721	6.34679	-0.429573	CHEMBL3406318	CHEMBL3406318	TRUE
CN(C(=O)c1ccc(F)cc1)c1ccc2[nH]c(-c3n[nH]c4ccccc34)cc2n1	CN(C(=O)c1ccc(Cl)cc1)c1ccc2[nH]c(-c3n[nH]c4ccccc34)cc2n1	5.91721	6.34679	-0.429573	CHEMBL3406318	CHEMBL3406318	TRUE
O=C(O)CCc1c(C(=O)O)[nH]c2cc(F)ccc12	O=C(O)CCc1c(C(=O)O)[nH]c2cc(Cl)ccc12	5	5.42946	-0.429457	CHEMBL4200085	CHEMBL4200085	TRUE
CCn1c(=O)/c(=C2\Sc3cc(Cl)ccc3N2C)s/c1=C\c1scc[n+]1Cc1ccc(F)cc1	CCn1c(=O)/c(=C2\Sc3cc(Cl)ccc3N2C)s/c1=C\c1scc[n+]1Cc1ccc(Cl)cc1	5.95861	6.38722	-0.428609	CHEMBL4137415	CHEMBL4137415	TRUE
Nc1cc(-c2ccccc2)ccc1Cn1cncc1CNc1ccc(F)c(F)c1	Nc1cc(-c2ccccc2)ccc1Cn1cncc1CNc1ccc(F)c(Cl)c1	8.49485	8.92082	-0.425969	CHEMBL2444665	CHEMBL2444665	TRUE
CCc1nn2cc(-c3nc4cc(F)ccc4o3)nc2s1	CCc1nn2cc(-c3nc4cc(Cl)ccc4o3)nc2s1	6.44249	6.86838	-0.425889	CHEMBL3734174	CHEMBL3734174	TRUE
O=C(O)C1CN(Cc2ccc(OCc3cccc(C(F)(F)F)c3)cc2F)C1	O=C(O)C1CN(Cc2ccc(OCc3cccc(C(F)(F)F)c3)cc2Cl)C1	6.16749	6.59176	-0.424269	CHEMBL3744617	CHEMBL3744617	TRUE
Cc1ccc(S(=O)(=O)Nc2cc(F)cc(C(=O)NCc3cccnc3)c2)cc1	Cc1ccc(S(=O)(=O)Nc2cc(Cl)cc(C(=O)NCc3cccnc3)c2)cc1	6.04576	6.46852	-0.422764	CHEMBL5154328	CHEMBL5154328	TRUE
O=C(NCCc1ccc(F)cc1)C1CCN(C(=O)c2cc3ccccc3n2Cc2ccc(Cl)cc2)CC1	O=C(NCCc1ccc(Cl)cc1)C1CCN(C(=O)c2cc3ccccc3n2Cc2ccc(Cl)cc2)CC1	4.66959	5.09151	-0.421929	CHEMBL3090145	CHEMBL3090145	TRUE
CN(C)c1ccc(CNC(=O)[CH]2CNC[CH]2c2ccc(C(F)(F)F)cc2F)cc1	CN(C)c1ccc(CNC(=O)[CH]2CNC[CH]2c2ccc(C(F)(F)F)cc2Cl)cc1	6.05061	6.46852	-0.417911	CHEMBL4392025	CHEMBL4392025	TRUE
CC(=NNC(=O)C1CC1c1ccccc1)c1ccc(F)cc1	CC(=NNC(=O)C1CC1c1ccccc1)c1ccc(Cl)cc1	7.284	7.69897	-0.414973	CHEMBL2439189	CHEMBL2439189	TRUE
Nc1nc2cc(C[CH]3CC[C]4(O)[CH]3O[CH](n3ccc5c(N)ncnc53)[CH]4O)ccc2cc1F	Nc1nc2cc(C[CH]3CC[C]4(O)[CH]3O[CH](n3ccc5c(N)ncnc53)[CH]4O)ccc2cc1Cl	8.08092	8.49485	-0.413928	CHEMBL4808436	CHEMBL4808436	TRUE
Cc1ncnc(C)c1C(=O)NCCC(C)N1CCC(N2C(=O)N(C3CCCCC3)CC2c2cccc(F)c2)CC1	Cc1ncnc(C)c1C(=O)NCCC(C)N1CCC(N2C(=O)N(C3CCCCC3)CC2c2cccc(Cl)c2)CC1	7.82391	8.23657	-0.412663	CHEMBL2439743	CHEMBL2439743	TRUE
C=CC(=O)Nc1cccc(Nc2nc(Nc3ccc(CP(=O)(OCC)OCC)cc3)ncc2F)c1	C=CC(=O)Nc1cccc(Nc2nc(Nc3ccc(CP(=O)(OCC)OCC)cc3)ncc2Cl)c1	4.45717	4.86967	-0.412492	CHEMBL3874810	CHEMBL3874810	TRUE
Oc1ccc(-c2cc(-c3cccc(F)c3)nc3c2Cc2c(O)cccc2-3)cc1	Oc1ccc(-c2cc(-c3cccc(Cl)c3)nc3c2Cc2c(O)cccc2-3)cc1	5.32331	5.73518	-0.411876	CHEMBL4375830	CHEMBL4375830	TRUE
CNC(=O)c1c(-c2ccc(F)cc2)oc2ccc(-c3cc(C(=O)NC4(c5ccccc5)CC4)ccc3F)cc12	CNC(=O)c1c(-c2ccc(F)cc2)oc2ccc(-c3cc(C(=O)NC4(c5ccccc5)CC4)ccc3Cl)cc12	7.79588	8.20761	-0.411728	CHEMBL4015582	CHEMBL4015582	TRUE
Fc1cccc(-c2n[nH]cc2N2CCNCC2)c1	Clc1cccc(-c2n[nH]cc2N2CCNCC2)c1	5.63	6.04144	-0.411436	CHEMBL4828349	CHEMBL4828349	TRUE
CC1CCCCC1NC(=O)c1ccc(F)c(F)c1	CC1CCCCC1NC(=O)c1ccc(F)c(Cl)c1	5.35952	5.76955	-0.410033	CHEMBL3720941	CHEMBL3720941	TRUE
C[CH](c1ccc(C(=O)NCCC(=O)O)cc1)N1C(=O)C(c2cccc(F)c2)=N[C]12CC[CH](C(C)(C)C)CC2	C[CH](c1ccc(C(=O)NCCC(=O)O)cc1)N1C(=O)C(c2cccc(Cl)c2)=N[C]12CC[CH](C(C)(C)C)CC2	5	5.40894	-0.408935	CHEMBL3242201	CHEMBL3242201	TRUE
CCOc1nc(NC(=O)C(C)(C)NC(=O)c2ccc3c(C4CCCC4)c(-c4ccc(F)cn4)n(C)c3c2)ccc1C=CC(=O)O	CCOc1nc(NC(=O)C(C)(C)NC(=O)c2ccc3c(C4CCCC4)c(-c4ccc(Cl)cn4)n(C)c3c2)ccc1C=CC(=O)O	7.63827	8.04576	-0.407485	CHEMBL3412639	CHEMBL3412639	TRUE
O=C(O)CCCCC(=O)Nc1ccc(-c2nc3cc(F)ccc3[nH]2)cc1	O=C(O)CCCCC(=O)Nc1ccc(-c2nc3cc(Cl)ccc3[nH]2)cc1	4	4.40671	-0.406714	CHEMBL3388394	CHEMBL3388394	TRUE
COc1cc(OC)cc(C(C#N)=Cc2ccccc2F)c1	COc1cc(OC)cc(C(C#N)=Cc2ccccc2Cl)c1	4.13912	4.54561	-0.406489	CHEMBL3873715	CHEMBL3873715	TRUE
Cn1ccnc1C(=O)Nc1ccc(N2C(=O)c3ccc(F)cc3C2=O)c(Cl)c1	Cn1ccnc1C(=O)Nc1ccc(N2C(=O)c3ccc(Cl)cc3C2=O)c(Cl)c1	6.17198	6.57675	-0.404769	CHEMBL3762431	CHEMBL3762431	TRUE
CC1(C)CN(c2ccccc2NC(=O)Nc2ccc(OC(F)(F)F)cc2)c2c(O)ccc(-c3ccc(F)cc3)c21	CC1(C)CN(c2ccccc2NC(=O)Nc2ccc(OC(F)(F)F)cc2)c2c(O)ccc(-c3ccc(Cl)cc3)c21	9.48149	9.88606	-0.404571	CHEMBL3365972	CHEMBL3365972	TRUE
Fc1ccc(-c2ccc(Cn3nnc4ccccc43)cc2)c(F)c1	Fc1cc(Cl)ccc1-c1ccc(Cn2nnc3ccccc32)cc1	7.14874	7.55284	-0.4041	CHEMBL4309066	CHEMBL4309066	TRUE
Cc1cc(C#N)cc(C)c1Oc1cc(Nc2ccc(F)cc2)nc2ccnn12	Cc1cc(C#N)cc(C)c1Oc1cc(Nc2ccc(Cl)cc2)nc2ccnn12	4.47366	4.87615	-0.402488	CHEMBL3240112	CHEMBL3240112	TRUE
CC(C)C12OC1C1OC13C1(OC1CC1(F)C4=C(CCC13C)C(=O)OC4)C2=O	CC(C)C12OC1C1OC13C1(OC1CC1(Cl)C4=C(CCC13C)C(=O)OC4)C2=O	6.36754	6.76955	-0.402008	CHEMBL3378374	CHEMBL3378374	TRUE
CC(=O)NCc1cccc(Cn2nc(NS(=O)(=O)c3ccc(Cl)s3)c3c(F)cccc32)c1	CC(=O)NCc1cccc(Cn2nc(NS(=O)(=O)c3ccc(Cl)s3)c3c(Cl)cccc32)c1	7.10002	7.50004	-0.400023	CHEMBL2330056	CHEMBL2330056	TRUE
Cc1cc(COc2ccc(F)cc2)nc(-c2ccccn2)n1	Cc1cc(COc2ccc(Cl)cc2)nc(-c2ccccn2)n1	6.2	6.6	-0.399999	CHEMBL3744105	CHEMBL3744105	TRUE
CN(C)C(=O)N[CH]1CC[CH](CCN2CCc3cccc(F)c3C2)CC1	CN(C)C(=O)N[CH]1CC[CH](CCN2CCc3cccc(Cl)c3C2)CC1	7.56992	7.96981	-0.39988	CHEMBL4394473	CHEMBL4394473	TRUE
CCn1c(CO)nn(-c2nc(O[CH](C)C(F)(F)F)c(C(=O)Nc3c(C)ccnc3F)cc2F)c1=O	CCn1c(CO)nn(-c2nc(O[CH](C)C(F)(F)F)c(C(=O)Nc3c(C)ccnc3Cl)cc2F)c1=O	8.30103	8.69897	-0.39794	CHEMBL5141995	CHEMBL5141995	TRUE
O=C(NCc1cc(F)cc(F)c1)[C]1(O)CCN(c2ccccc2)C1=O	O=C(NCc1cc(F)cc(Cl)c1)[C]1(O)CCN(c2ccccc2)C1=O	6.60206	7	-0.39794	CHEMBL4397058	CHEMBL4397058	TRUE
CN1CCC(Nc2ccc3ncc(-c4ccc(Nc5ncc(F)cc5F)cc4)n3n2)CC1	CN1CCC(Nc2ccc3ncc(-c4ccc(Nc5ncc(Cl)cc5F)cc4)n3n2)CC1	6.69897	7.09691	-0.39794	CHEMBL3265826	CHEMBL3265826	TRUE
Cc1cccc(NC(=O)c2nc(C)n(-c3ccc(F)c(Cl)c3)c2C)n1	Cc1cccc(NC(=O)c2nc(C)n(-c3ccc(Cl)c(Cl)c3)c2C)n1	7.83863	8.23657	-0.39794	CHEMBL2350953	CHEMBL2350953	TRUE
COC(=O)NC(C(=O)N1CCCC1c1ncc(-c2ccc3c(c2)OC(c2cccc(F)c2)n2c-3cc3cc(-c4cnc(C5CCCN5C(=O)C(NC(=O)OC)C(C)C)[nH]4)ccc32)[nH]1)C(C)C	COC(=O)NC(C(=O)N1CCCC1c1ncc(-c2ccc3c(c2)OC(c2cccc(Cl)c2)n2c-3cc3cc(-c4cnc(C5CCCN5C(=O)C(NC(=O)OC)C(C)C)[nH]4)ccc32)[nH]1)C(C)C	9	9.39794	-0.39794	CHEMBL3825587	CHEMBL3825587	TRUE
COc1ccc(C2(C)CCCc3nc(SCc4c(F)cccc4F)n(-c4ccc(F)cc4)c32)cc1OC	COc1ccc(C2(C)CCCc3nc(SCc4c(F)cccc4Cl)n(-c4ccc(F)cc4)c32)cc1OC	7.60206	8	-0.39794	CHEMBL4000086	CHEMBL4000086	TRUE
Cc1cc(C)c(Cn2cc(C(=O)C3=C(O)C(=O)OC3)c3cc(F)ccc32)c(C)c1	Cc1cc(C)c(Cn2cc(C(=O)C3=C(O)C(=O)OC3)c3cc(Cl)ccc32)c(C)c1	4.31016	4.70268	-0.392519	CHEMBL3242248	CHEMBL3242248	TRUE
CC(C)(C)OC(=O)N[CH]1CCCCC/C=C\[CH]2C[C]2(C(=O)O)NC(=O)[CH]2C[CH](OC(=O)N3Cc4cccc(F)c4C3)CN2C1=O	CC(C)(C)OC(=O)N[CH]1CCCCC/C=C\[CH]2C[C]2(C(=O)O)NC(=O)[CH]2C[CH](OC(=O)N3Cc4cccc(Cl)c4C3)CN2C1=O	5.89688	6.28735	-0.39047	CHEMBL3122259	CHEMBL3122259	TRUE
O=C(NCc1ccc(F)cc1)[CH]1[CH]2C=C[CH]([CH]1C(=O)NCCCCN1CCCC1)C21CC1	O=C(NCc1ccc(Cl)cc1)[CH]1[CH]2C=C[CH]([CH]1C(=O)NCCCCN1CCCC1)C21CC1	6.7986	7.18709	-0.388484	CHEMBL3734553	CHEMBL3734553	TRUE
COC(=O)N1CCN(C(=O)Cc2ccc(F)c(Cl)c2)[CH]2[CH](N3CC[CH](O)C3)CCC[CH]21	COC(=O)N1CCN(C(=O)Cc2ccc(Cl)c(Cl)c2)[CH]2[CH](N3CC[CH](O)C3)CCC[CH]21	8.65758	9.04576	-0.38818	CHEMBL4009152	CHEMBL4009152	TRUE
O=C(Nc1cc(F)cc(C(F)(F)F)c1)N1CCC(O)(c2ccc(F)cc2)CC1	O=C(Nc1cc(F)cc(C(F)(F)F)c1)N1CCC(O)(c2ccc(Cl)cc2)CC1	5.02228	5.40894	-0.386659	CHEMBL3619044	CHEMBL3619044	TRUE
CC(=NNC(=O)C1CC1c1ccc(C(C)(C)C)cc1)c1ccc(F)cc1	CC(=NNC(=O)C1CC1c1ccc(C(C)(C)C)cc1)c1ccc(Cl)cc1	7.79588	8.18046	-0.384576	CHEMBL2439189	CHEMBL2439189	TRUE
CCCNNC(=O)c1ccc(CNC(=O)c2cc3cc(F)ccc3[nH]2)cc1	CCCNNC(=O)c1ccc(CNC(=O)c2cc3cc(Cl)ccc3[nH]2)cc1	7.03977	7.42412	-0.384353	CHEMBL5043887	CHEMBL5043887	TRUE
CC12COS(=O)(=O)CC1=C(c1ccc(F)cc1)C(=O)O2	CC12COS(=O)(=O)CC1=C(c1ccc(Cl)cc1)C(=O)O2	5.92082	6.30103	-0.380211	CHEMBL3269981	CHEMBL3269981	TRUE
CC(C)S(=O)(=O)c1c(Cl)ccc(NC2=NC(=O)C(c3ccc(F)cc3)N2)c1O	CC(C)S(=O)(=O)c1c(Cl)ccc(NC2=NC(=O)C(c3ccc(Cl)cc3)N2)c1O	5.65956	6.03858	-0.379023	CHEMBL4715191	CHEMBL4715191	TRUE
O=[N+]([O-])CC(c1ccccc1F)c1c(-c2ccccc2)[nH]c2ccccc12	O=[N+]([O-])CC(c1ccccc1Cl)c1c(-c2ccccc2)[nH]c2ccccc12	7.36653	7.74473	-0.378196	CHEMBL4672178	CHEMBL4672178	TRUE
OCC1CCCCN1c1nc(NCCc2cccc(F)c2)c2ccccc2n1	OCC1CCCCN1c1nc(NCCc2cccc(Cl)c2)c2ccccc2n1	5.72584	6.10237	-0.376531	CHEMBL4429041	CHEMBL4429041	TRUE
COc1cccc(F)c1-c1nc(CN2CCC(C(=O)NCCCN3C[CH](C)C[CH](C)C3)CC2)c(C)o1	COc1cccc(Cl)c1-c1nc(CN2CCC(C(=O)NCCCN3C[CH](C)C[CH](C)C3)CC2)c(C)o1	6.23882	6.61439	-0.37557	CHEMBL4039792	CHEMBL4039792	TRUE
C=CC(=O)N1CC[CH](N2C(=O)N(c3ccccc3)Cc3cnc(Nc4ccc(N5CCN(C)CC5)c(F)c4)nc32)C1	C=CC(=O)N1CC[CH](N2C(=O)N(c3ccccc3)Cc3cnc(Nc4ccc(N5CCN(C)CC5)c(Cl)c4)nc32)C1	6.67572	7.05061	-0.374892	CHEMBL3088812	CHEMBL3088812	TRUE
COc1ccc(N2C(=O)CN(Cc3ccc(F)cc3F)C2=S)cc1OC	COc1ccc(N2C(=O)CN(Cc3ccc(F)cc3Cl)C2=S)cc1OC	7.48149	7.85387	-0.372386	CHEMBL4193895	CHEMBL4193895	TRUE
CS(=O)(=O)Nc1ccc(NC(=O)c2cc(C(F)(F)F)cc(C(F)(F)F)c2)cc1F	CS(=O)(=O)Nc1ccc(NC(=O)c2cc(C(F)(F)F)cc(C(F)(F)F)c2)cc1Cl	4.62562	4.99654	-0.370921	CHEMBL4481933	CHEMBL4481933	TRUE
O=C(N1CCN(c2cccc(F)c2)CC1)n1c2ccccc2c(=O)c2ccccc21	O=C(N1CCN(c2cccc(Cl)c2)CC1)n1c2ccccc2c(=O)c2ccccc21	7.05061	7.42022	-0.369606	CHEMBL4687993	CHEMBL4687993	TRUE
O=C(Nc1cc(F)c(F)c(F)c1)c1cc(S(=O)(=O)N2CCOCC2)c(Cl)cc1Cl	O=C(Nc1cc(F)c(Cl)c(F)c1)c1cc(S(=O)(=O)N2CCOCC2)c(Cl)cc1Cl	4.85387	5.22185	-0.367977	CHEMBL3998930	CHEMBL3998930	TRUE
Cc1ccc(-c2nc(N)c3nn(Cc4ccccc4F)cc3n2)o1	Cc1ccc(-c2nc(N)c3nn(Cc4ccccc4Cl)cc3n2)o1	6.451	6.81816	-0.36716	CHEMBL3802558	CHEMBL3802558	TRUE
CCCCC1(O)C(=O)Nc2ccc(Nc3ccc(F)cc3)cc21	CCCCC1(O)C(=O)Nc2ccc(Nc3ccc(Cl)cc3)cc21	5.18709	5.55284	-0.365755	CHEMBL4370938	CHEMBL4370938	TRUE
CC(C)CN1C(=O)c2ccccc2[CH](C(=O)Nc2cc(F)cc(C#N)c2)[CH]1c1cccs1	CC(C)CN1C(=O)c2ccccc2[CH](C(=O)Nc2cc(Cl)cc(C#N)c2)[CH]1c1cccs1	7.23657	7.60206	-0.365488	CHEMBL4429066	CHEMBL4429066	TRUE
Cc1ccc(S(=O)(=O)N2CCc3cc(C(=O)NCCN(Cc4ccc(F)cc4)C(C)(C)C)ccc3C2)cc1	Cc1ccc(S(=O)(=O)N2CCc3cc(C(=O)NCCN(Cc4ccc(Cl)cc4)C(C)(C)C)ccc3C2)cc1	8.4318	8.79588	-0.364082	CHEMBL3590953	CHEMBL3590953	TRUE
Cc1ccc(S(=O)(=O)N2CCc3cc(C(=O)NCCN(Cc4ccc(F)cc4)C(C)(C)C)ccc3C2)cc1	Cc1ccc(S(=O)(=O)N2CCc3cc(C(=O)NCCN(Cc4ccc(Cl)cc4)C(C)(C)C)ccc3C2)cc1	8.4318	8.79588	-0.364082	CHEMBL3590953	CHEMBL3590953	TRUE
COc1cc(OC)cc(C(C#N)=Cc2ccc(F)cc2)c1	COc1cc(OC)cc(C(C#N)=Cc2ccc(Cl)cc2)c1	4	4.36341	-0.363412	CHEMBL3873713	CHEMBL3873713	TRUE
O=C(NCC12CC(CN1Cc1ccccc1)C2)c1ccc(F)c(Br)c1	O=C(NCC12CC(CN1Cc1ccccc1)C2)c1ccc(Cl)c(Br)c1	4.92082	5.284	-0.363178	CHEMBL4731972	CHEMBL4731972	TRUE
Cc1c(C(=O)Nc2ccc(Oc3ccnc4[nH]ccc34)cc2)nnn1-c1ccc(F)c(F)c1	Cc1c(C(=O)Nc2ccc(Oc3ccnc4[nH]ccc34)cc2)nnn1-c1ccc(F)c(Cl)c1	5.64589	6.00877	-0.362882	CHEMBL3778976	CHEMBL3778976	TRUE
CCS(=O)(=O)Nc1cccc(-c2cc(=O)n(-c3ccc(F)c(Cl)c3)nc2C)c1	CCS(=O)(=O)Nc1cccc(-c2cc(=O)n(-c3ccc(Cl)c(Cl)c3)nc2C)c1	4.5743	4.93667	-0.362364	CHEMBL2399206	CHEMBL2399206	TRUE
CC(C)(C)c1cc(NC(=O)C2CCC(=O)N2c2ccc(F)cc2)on1	CC(C)(C)c1cc(NC(=O)C2CCC(=O)N2c2ccc(Cl)cc2)on1	7.85387	8.21467	-0.360798	CHEMBL3373564	CHEMBL3373564	TRUE
C=CC(=O)Nc1cccc(Nc2nc(Nc3ccc(C=Cc4cc(C)cc(C)c4)cc3)ncc2F)c1	C=CC(=O)Nc1cccc(Nc2nc(Nc3ccc(C=Cc4cc(C)cc(C)c4)cc3)ncc2Cl)c1	4.89245	5.25259	-0.360137	CHEMBL4025988	CHEMBL4025988	TRUE
C#Cc1nc(C(=O)N2CCN(c3ccc(F)cc3)CC2)cs1	C#Cc1nc(C(=O)N2CCN(c3ccc(Cl)cc3)CC2)cs1	7.19382	7.55284	-0.359022	CHEMBL5142939	CHEMBL5142939	TRUE
COc1ccc(-c2ccccc2F)cc1C12CC3CC(CC(C3)C1)C2	COc1ccc(-c2ccccc2Cl)cc1C12CC3CC(CC(C3)C1)C2	4.30103	4.65956	-0.358526	CHEMBL4716307	CHEMBL4716307	TRUE
O=C(O)C(Cc1ccc(F)cc1)=NO	O=C(O)C(Cc1ccc(Cl)cc1)=NO	2.40121	2.75945	-0.358241	CHEMBL3804624	CHEMBL3804624	TRUE
O=C(O)c1ccc(CNC(=O)c2cc(F)cnc2Oc2ccc(F)cc2)cc1	O=C(O)c1ccc(CNC(=O)c2cc(Cl)cnc2Oc2ccc(F)cc2)cc1	6.24033	6.59517	-0.354834	CHEMBL3997107	CHEMBL3997107	TRUE
O=C(Nc1ccn(S(=O)(=O)Cc2ccc(F)cc2F)c1)c1ccccn1	O=C(Nc1ccn(S(=O)(=O)Cc2ccc(F)cc2Cl)c1)c1ccccn1	6.72125	7.07572	-0.354474	CHEMBL3810852	CHEMBL3810852	TRUE
COc1ccc(CCNC(=O)Nc2ccc(F)cc2)cc1	COc1ccc(CCNC(=O)Nc2ccc(Cl)cc2)cc1	6.04576	6.39794	-0.352183	CHEMBL3592312	CHEMBL3592312	TRUE
CCCCN(c1nc2c(C(=O)O)cccc2o1)C(C)c1ccc(-c2cc(F)ccc2-c2nc(=O)o[nH]2)cc1	CCCCN(c1nc2c(C(=O)O)cccc2o1)C(C)c1ccc(-c2cc(Cl)ccc2-c2nc(=O)o[nH]2)cc1	8.56864	8.92082	-0.352183	CHEMBL4727805	CHEMBL4727805	TRUE
COc1ccc(CCNC(=O)Nc2ccc(F)cc2)cc1	COc1ccc(CCNC(=O)Nc2ccc(Cl)cc2)cc1	6.04576	6.39794	-0.352183	CHEMBL3592312	CHEMBL3592312	TRUE
COc1cc2nccc(Oc3ccc(NC(=O)c4cnc(Cl)cc4Nc4ccccc4F)cc3)c2cc1OC	COc1cc2nccc(Oc3ccc(NC(=O)c4cnc(Cl)cc4Nc4ccccc4Cl)cc3)c2cc1OC	5.09151	5.4437	-0.352183	CHEMBL4387127	CHEMBL4387127	TRUE
COc1cc(OC)c2c(C)c(Cc3ccc(F)cc3)c(=O)[nH]c2c1	COc1cc(OC)c2c(C)c(Cc3ccc(Cl)cc3)c(=O)[nH]c2c1	6.3279	6.67778	-0.349879	CHEMBL3721046	CHEMBL3721046	TRUE
CN(C)CCNc1cc(/C=C/c2ccco2)nc2ccc(F)cc12	CN(C)CCNc1cc(/C=C/c2ccco2)nc2ccc(Cl)cc12	7.08302	7.4318	-0.348778	CHEMBL4671338	CHEMBL4671338	TRUE
CCOC(=O)C1=C(C(=O)OCC)C2CSC(CS1)N2Cc1ccc(F)cc1	CCOC(=O)C1=C(C(=O)OCC)C2CSC(CS1)N2Cc1ccc(Cl)cc1	4.74958	5.09691	-0.34733	CHEMBL4373929	CHEMBL4373929	TRUE
NS(=O)(=O)c1ccc2c(c1)C(=O)C(=O)N2Cc1c(F)cccc1F	NS(=O)(=O)c1ccc2c(c1)C(=O)C(=O)N2Cc1c(F)cccc1Cl	4.39794	4.74473	-0.346787	CHEMBL5047316	CHEMBL5047316	TRUE
O=C(Nc1nc(CF)cs1)c1cc(F)cc(Oc2cncnc2)c1	O=C(Nc1nc(CF)cs1)c1cc(Cl)cc(Oc2cncnc2)c1	6.66354	7.01002	-0.346476	CHEMBL2446782	CHEMBL2446782	TRUE
COc1nn2cc(-c3cc4ccc(F)cc4o3)nc2s1	COc1nn2cc(-c3cc4ccc(Cl)cc4o3)nc2s1	8.10127	8.44612	-0.344842	CHEMBL3734174	CHEMBL3734174	TRUE
O=C(c1nnc(-c2ccc(F)cc2)o1)N1CCC(Oc2ccc(CN3CCCC3)cc2)CC1	O=C(c1nnc(-c2ccc(Cl)cc2)o1)N1CCC(Oc2ccc(CN3CCCC3)cc2)CC1	7.35655	7.69897	-0.342423	CHEMBL3791470	CHEMBL3791470	TRUE
O=C(Nc1ccc(OCCN2CCCCC2)c(F)c1)c1cccc(-c2cccc(O)c2)c1	O=C(Nc1ccc(OCCN2CCCCC2)c(Cl)c1)c1cccc(-c2cccc(O)c2)c1	4.66817	5.01055	-0.342382	CHEMBL3399479	CHEMBL3399479	TRUE
O=C(Nc1ccc(OCCN2CCCCC2)c(F)c1)c1cccc(-c2cccc(O)c2)c1	O=C(Nc1ccc(OCCN2CCCCC2)c(Cl)c1)c1cccc(-c2cccc(O)c2)c1	4.66817	5.01055	-0.342382	CHEMBL3399479	CHEMBL3399479	TRUE
COc1ccc2c3c1O[CH]1[CH](N(C)C(=O)/C=C/c4ccoc4)CC[C]4(O)[CH](C2)N(S(=O)(=O)c2cccc(F)c2)CC[C]314	COc1ccc2c3c1O[CH]1[CH](N(C)C(=O)/C=C/c4ccoc4)CC[C]4(O)[CH](C2)N(S(=O)(=O)c2cccc(Cl)c2)CC[C]314	8.11919	8.45967	-0.340484	CHEMBL3993332	CHEMBL3993332	TRUE
CN(Cc1ccsc1)CC1CCN(Cc2ccc(F)cc2)CC1	CN(Cc1ccsc1)CC1CCN(Cc2ccc(Cl)cc2)CC1	4.88941	5.22915	-0.339738	CHEMBL5159907	CHEMBL5159907	TRUE
Oc1cccc(-c2cc(-c3ccccc3F)nc3c2Cc2cccc(O)c2-3)c1	Oc1cccc(-c2cc(-c3ccccc3Cl)nc3c2Cc2cccc(O)c2-3)c1	5.07935	5.41794	-0.338582	CHEMBL4375830	CHEMBL4375830	TRUE
COc1cc(F)c(F)cc1C1CC1CN	COc1cc(F)c(Cl)cc1C1CC1CN	6.29158	6.63001	-0.338426	CHEMBL3773632	CHEMBL3773632	TRUE
COc1cc(C(=O)c2ccn(-c3cccc(F)c3)c2)cc(OC)c1OC	COc1cc(C(=O)c2ccn(-c3cccc(Cl)c3)c2)cc(OC)c1OC	5.88606	6.22185	-0.335792	CHEMBL3372545	CHEMBL3372545	TRUE
COc1cc(C(=O)NC2CC3CCCC(C2)N3CC(=O)Nc2ccc(F)cc2)cc(OC)c1OC	COc1cc(C(=O)NC2CC3CCCC(C2)N3CC(=O)Nc2ccc(Cl)cc2)cc(OC)c1OC	4.51286	4.84771	-0.33485	CHEMBL4611268	CHEMBL4611268	TRUE
CCc1ccc(-c2nc3c(c(C)nn3-c3ccccc3)c(-c3ccccc3F)c2C#N)cc1	CCc1ccc(-c2nc3c(c(C)nn3-c3ccccc3)c(-c3ccccc3Cl)c2C#N)cc1	6.10624	6.44009	-0.333855	CHEMBL4671169	CHEMBL4671169	TRUE
Fc1cc(-c2ccn3c(CC4CC4)nnc3c2Cl)ccc1NC1CC1	Clc1cc(-c2ccn3c(CC4CC4)nnc3c2Cl)ccc1NC1CC1	7.19997	7.53003	-0.33006	CHEMBL4040508	CHEMBL4040508	TRUE
CCCC(CCC)NC(=O)Nc1ccccc1F	CCCC(CCC)NC(=O)Nc1ccccc1Cl	6.10237	6.4318	-0.329425	CHEMBL3720907	CHEMBL3720907	TRUE
COc1cc(F)c(-c2c(C)nn3c(C(F)(F)F)cc(C)nc23)cc1F	COc1cc(F)c(-c2c(C)nn3c(C(F)(F)F)cc(C)nc23)cc1Cl	5.99	6.31876	-0.328757	CHEMBL4140826	CHEMBL4140826	TRUE
CN(Cc1ccsc1)CC1CCN(CCCc2ccccc2F)CC1	CN(Cc1ccsc1)CC1CCN(CCCc2ccccc2Cl)CC1	4.9393	5.26761	-0.328304	CHEMBL5159907	CHEMBL5159907	TRUE
N#Cc1ccc(Nc2nccc(OCC(=O)Nc3ccc(F)cc3)n2)cc1	N#Cc1ccc(Nc2nccc(OCC(=O)Nc3ccc(Cl)cc3)n2)cc1	3.46342	3.7914	-0.327981	CHEMBL3399852	CHEMBL3399852	TRUE
N#Cc1ccc(Nc2nccc(OCC(=O)Nc3ccc(F)cc3)n2)cc1	N#Cc1ccc(Nc2nccc(OCC(=O)Nc3ccc(Cl)cc3)n2)cc1	3.46342	3.7914	-0.327981	CHEMBL3399852	CHEMBL3399852	TRUE
Oc1cccc(-c2cc(-c3cccc(F)c3)nc3c2Cc2c(O)cccc2-3)c1	Oc1cccc(-c2cc(-c3cccc(Cl)c3)nc3c2Cc2c(O)cccc2-3)c1	5.15243	5.48017	-0.327745	CHEMBL4375833	CHEMBL4375833	TRUE
O=C1CSC(c2c(F)cccc2Cl)N1c1ccccn1	O=C1CSC(c2c(Cl)cccc2Cl)N1c1ccccn1	5.67778	6.00436	-0.326584	CHEMBL3295869	CHEMBL3295869	TRUE
COc1cc(C(=O)NC2CC3CCCC(C2)N3Cc2nc3c(F)cccc3s2)cc(OC)c1OC	COc1cc(C(=O)NC2CC3CCCC(C2)N3Cc2nc3c(Cl)cccc3s2)cc(OC)c1OC	5.72125	6.04576	-0.324511	CHEMBL4611268	CHEMBL4611268	TRUE
O=C(/C=C/c1cn(Cc2ccc(F)cc2)c2ccccc12)CC(=O)C(=O)O	O=C(/C=C/c1cn(Cc2ccc(Cl)cc2)c2ccccc12)CC(=O)C(=O)O	4.39794	4.72125	-0.323306	CHEMBL2445049	CHEMBL2445049	TRUE
Cc1c(Cl)cccc1NC(=O)c1nnn(-c2ccccc2F)c1C	Cc1c(Cl)cccc1NC(=O)c1nnn(-c2ccccc2Cl)c1C	5.18709	5.50864	-0.321552	CHEMBL3802538	CHEMBL3802538	TRUE
O=c1[nH]c(=O)n(C2OC(COP(=O)(O)CP(=O)(O)O)C(O)C2O)cc1F	O=c1[nH]c(=O)n(C2OC(COP(=O)(O)CP(=O)(O)O)C(O)C2O)cc1Cl	6.6925	7.01323	-0.320724	CHEMBL4823007	CHEMBL4823007	TRUE
O=C1OCC(Cc2ccccc2)C1Cc1cccc(F)c1	O=C1OCC(Cc2ccccc2)C1Cc1cccc(Cl)c1	4.12494	4.4437	-0.318759	CHEMBL4058420	CHEMBL4058420	TRUE
COc1ccc([CH](C)NC(=O)Cn2nnc3c(F)cccc3c2=O)cc1	COc1ccc([CH](C)NC(=O)Cn2nnc3c(Cl)cccc3c2=O)cc1	7.56864	7.88606	-0.31742	CHEMBL4742409	CHEMBL4742409	TRUE
Cc1cc(Nc2ncc(F)c(Nc3cn(C)nc3S(=O)(=O)C(C)C)n2)c(OC2CC2)cc1C1CCN(C)CC1	Cc1cc(Nc2ncc(Cl)c(Nc3cn(C)nc3S(=O)(=O)C(C)C)n2)c(OC2CC2)cc1C1CCN(C)CC1	7.09151	7.40894	-0.31742	CHEMBL3791913	CHEMBL3791913	TRUE
Cn1c(C[S+]([O-])c2ccc(F)cc2)c(C(=O)OC(C)(C)C)c2cc(O)ccc21	Cn1c(C[S+]([O-])c2ccc(Cl)cc2)c(C(=O)OC(C)(C)C)c2cc(O)ccc21	4.76955	5.08619	-0.316635	CHEMBL3870016	CHEMBL3870016	TRUE
CCn1nnc([CH]2O[CH](n3cnc4c(NCc5cccc(F)c5)nc(Cl)nc43)[CH](O)[CH]2O)n1	CCn1nnc([CH]2O[CH](n3cnc4c(NCc5cccc(Cl)c5)nc(Cl)nc43)[CH](O)[CH]2O)n1	6.6216	6.93554	-0.31394	CHEMBL4052146	CHEMBL4052146	TRUE
Fc1ccc(NCc2coc(/C=C/c3ccc(C(F)(F)F)cc3)n2)cc1	FC(F)(F)c1ccc(/C=C/c2nc(CNc3ccc(Cl)cc3)co2)cc1	4.81816	5.13194	-0.313787	CHEMBL5122918	CHEMBL5122918	TRUE
O=C(CSc1nc(Nc2ccccc2)c2ccccc2n1)Nc1ccc(F)cc1	O=C(CSc1nc(Nc2ccccc2)c2ccccc2n1)Nc1ccc(Cl)cc1	4.78146	5.09474	-0.313279	CHEMBL4809810	CHEMBL4809810	TRUE
Cc1cccc(F)c1-c1nc(CN2CCC(C(=O)NCCCN3C[CH](C)C[CH](C)C3)CC2)c(C)o1	Cc1cccc(Cl)c1-c1nc(CN2CCC(C(=O)NCCCN3C[CH](C)C[CH](C)C3)CC2)c(C)o1	6.64589	6.95861	-0.312716	CHEMBL4039792	CHEMBL4039792	TRUE
CC(c1ccc(F)cc1)N1CCC(n2c(=O)[nH]c3ccccc32)CC1	CC(c1ccc(Cl)cc1)N1CCC(n2c(=O)[nH]c3ccccc32)CC1	6.42366	6.73518	-0.311524	CHEMBL4201554	CHEMBL4201554	TRUE
O=S(=O)(c1ccc(F)c(F)c1)c1cnc2cc(F)ccc2c1-c1ccc(F)cc1	O=S(=O)(c1ccc(F)c(Cl)c1)c1cnc2cc(F)ccc2c1-c1ccc(F)cc1	7.36653	7.67778	-0.311249	CHEMBL4008950	CHEMBL4008950	TRUE
CC(C)(C)CN1CCC2(CC1)CN(c1ccccc1NC(=O)Nc1ccc(OC(F)(F)F)cc1)c1c(O)ccc(F)c12	CC(C)(C)CN1CCC2(CC1)CN(c1ccccc1NC(=O)Nc1ccc(OC(F)(F)F)cc1)c1c(O)ccc(Cl)c12	6.03621	6.34679	-0.310575	CHEMBL3292932	CHEMBL3292932	TRUE
O=C(Nc1ccc(Oc2ccnc3[nH]ccc23)cc1)c1cc(-c2ccc(F)cc2)ncn1	O=C(Nc1ccc(Oc2ccnc3[nH]ccc23)cc1)c1cc(-c2ccc(Cl)cc2)ncn1	4.7997	5.10958	-0.309882	CHEMBL3776882	CHEMBL3776882	TRUE
C[CH]1C(C(F)(F)F)=NN(c2ccc(OC3CCN(c4cc(Cl)ccc4F)CC3)cc2)[CH]1CC(=O)O	C[CH]1C(C(F)(F)F)=NN(c2ccc(OC3CCN(c4cc(Cl)ccc4Cl)CC3)cc2)[CH]1CC(=O)O	6.29243	6.60206	-0.30963	CHEMBL4023129	CHEMBL4023129	TRUE
Cc1cc(NCc2cncn2Cc2ccc(-c3ccccc3)cc2F)ccc1F	Cc1cc(NCc2cncn2Cc2ccc(-c3ccccc3)cc2Cl)ccc1F	7.27572	7.58503	-0.309303	CHEMBL2444665	CHEMBL2444665	TRUE
N#Cc1ccc(NC(=O)c2cc(F)ccc2O)cc1	N#Cc1ccc(NC(=O)c2cc(Cl)ccc2O)cc1	5.84771	6.1549	-0.30719	CHEMBL4386826	CHEMBL4386826	TRUE
O=C(Nc1cc(F)ccn1)c1cc(Cl)cc(Oc2cncnc2)c1	O=C(Nc1cc(Cl)ccn1)c1cc(Cl)cc(Oc2cncnc2)c1	6.46725	6.77001	-0.302766	CHEMBL2446782	CHEMBL2446782	TRUE
O=C(NCc1ccc(F)cc1)c1nn(CCO)c2c1CN(Cc1c[nH]c3ccccc13)CC2	O=C(NCc1ccc(Cl)cc1)c1nn(CCO)c2c1CN(Cc1c[nH]c3ccccc13)CC2	4.9393	5.24109	-0.301786	CHEMBL4380602	CHEMBL4380602	TRUE
CN(C)CCCNc1nc(-c2ccc(F)cc2)nc2ccccc12	CN(C)CCCNc1nc(-c2ccc(Cl)cc2)nc2ccccc12	4.88606	5.18709	-0.30103	CHEMBL5105113	CHEMBL5105113	TRUE
CN(c1nnc(-c2c(O)cc(-c3cn[nH]c3)cc2F)s1)C1CC(C)(C)NC(C)(C)C1	CN(c1nnc(-c2c(O)cc(-c3cn[nH]c3)cc2Cl)s1)C1CC(C)(C)NC(C)(C)C1	8.22185	8.52288	-0.30103	CHEMBL4808915	CHEMBL4808915	TRUE
O=C(N[CH]1CCC[CH](Nc2nc(-c3c[nH]c4ncc(F)cc34)ncc2F)C1)N1CCOCC1	O=C(N[CH]1CCC[CH](Nc2nc(-c3c[nH]c4ncc(Cl)cc34)ncc2F)C1)N1CCOCC1	8.39794	8.69897	-0.30103	CHEMBL3369821	CHEMBL3369821	TRUE
Cc1ccc(OCc2cccc(C(=O)O)c2)c(F)c1	Cc1ccc(OCc2cccc(C(=O)O)c2)c(Cl)c1	6	6.30103	-0.30103	CHEMBL4808118	CHEMBL4808118	TRUE
O=S(=O)(c1ccc(Cl)cc1)N1CCCc2ccc(Oc3cc(-c4nc(C5CC5)no4)cc(F)n3)cc21	O=S(=O)(c1ccc(Cl)cc1)N1CCCc2ccc(Oc3cc(-c4nc(C5CC5)no4)cc(Cl)n3)cc21	7	7.30103	-0.30103	CHEMBL3118588	CHEMBL3118588	TRUE
CC(C)(C)S(=O)(=O)Nc1ccc(-c2c(C(N)=O)c3cc(F)c(OC(F)F)cc3n2C2CCCCC2)c(F)c1	CC(C)(C)S(=O)(=O)Nc1ccc(-c2c(C(N)=O)c3cc(F)c(OC(F)F)cc3n2C2CCCCC2)c(Cl)c1	8.69897	9	-0.30103	CHEMBL3755877	CHEMBL3755877	TRUE
CC1=C(C=CC2=NN(c3ccccc3)C(c3ccc(F)cc3)C2)C(C)(C)CCC1	CC1=C(C=CC2=NN(c3ccccc3)C(c3ccc(Cl)cc3)C2)C(C)(C)CCC1	4.39794	4.69897	-0.30103	CHEMBL2340911	CHEMBL2340911	TRUE
CC1=C(c2nc(-c3ccc(F)cc3)cs2)C(c2cccc(O)c2)NC(=O)N1	CC1=C(c2nc(-c3ccc(Cl)cc3)cs2)C(c2cccc(O)c2)NC(=O)N1	5.42022	5.72125	-0.30103	CHEMBL4043720	CHEMBL4043720	TRUE
CC(C)(COc1ccn2c(CC3CC3)nnc2c1C(F)(F)F)c1ccc(F)cc1	CC(C)(COc1ccn2c(CC3CC3)nnc2c1C(F)(F)F)c1ccc(Cl)cc1	7.95861	8.25964	-0.30103	CHEMBL3876529	CHEMBL3876529	TRUE
Cc1cc(-c2sc(Cc3cccc(F)c3)nc2C)ccc1C(N)=O	Cc1cc(-c2sc(Cc3cccc(Cl)c3)nc2C)ccc1C(N)=O	6.58503	6.88606	-0.30103	CHEMBL4034862	CHEMBL4034862	TRUE
CN(C)c1ccc(N2C(=O)CN(Cc3ccc(F)cc3F)C2=S)cc1Cl	CN(C)c1ccc(N2C(=O)CN(Cc3ccc(F)cc3Cl)C2=S)cc1Cl	8.39794	8.69897	-0.30103	CHEMBL4193895	CHEMBL4193895	TRUE
COc1nn(C)cc1C(=O)Nc1cc(C#N)cnc1N1CCN(Cc2c(F)cc(F)cc2F)CC1	COc1nn(C)cc1C(=O)Nc1cc(C#N)cnc1N1CCN(Cc2c(F)cc(Cl)cc2F)CC1	6.8	7.10002	-0.300017	CHEMBL4418470	CHEMBL4418470	TRUE
Cc1cc(C)c(NS(=O)(=O)c2ccc(F)cc2)c(C)c1	Cc1cc(C)c(NS(=O)(=O)c2ccc(Cl)cc2)c(C)c1	5.2	5.5	-0.299999	CHEMBL3364891	CHEMBL3364891	TRUE
Cc1cc(COc2cccc(F)c2)nc(-c2ccccn2)n1	Cc1cc(COc2cccc(Cl)c2)nc(-c2ccccn2)n1	6.1	6.4	-0.299998	CHEMBL3744105	CHEMBL3744105	TRUE
COc1ccc(S(=O)(=O)Nc2c(C)cc(F)cc2C)cc1	COc1ccc(S(=O)(=O)Nc2c(C)cc(Cl)cc2C)cc1	6	6.3	-0.299998	CHEMBL3364891	CHEMBL3364891	TRUE
Cc1cc(/C=C/C#N)cc(C)c1Oc1nc(NC2CCN(Cc3ccc(C(N)=O)cc3)CC2)ncc1-c1ccnc(F)c1	Cc1cc(/C=C/C#N)cc(C)c1Oc1nc(NC2CCN(Cc3ccc(C(N)=O)cc3)CC2)ncc1-c1ccnc(Cl)c1	8.08302	8.383	-0.29998	CHEMBL4835284	CHEMBL4835284	TRUE
COc1cc(C(=O)NC2CC3CCCC(C2)N3CC(=O)Nc2cccc(F)c2)cc(OC)c1OC	COc1cc(C(=O)NC2CC3CCCC(C2)N3CC(=O)Nc2cccc(Cl)c2)cc(OC)c1OC	5.07058	5.36653	-0.29595	CHEMBL4611268	CHEMBL4611268	TRUE
CNC(=O)c1cc(Oc2ccc(C3=NNC(c4ccc(F)cc4Cl)C3)cc2)ccn1	CNC(=O)c1cc(Oc2ccc(C3=NNC(c4ccc(Cl)cc4Cl)C3)cc2)ccn1	4.8636	5.15927	-0.29567	CHEMBL4179081	CHEMBL4179081	TRUE
Cc1cc(NC2CCc3cc(F)ccc3C2)n2nc(C(C)(F)F)nc2n1	Cc1cc(NC2CCc3cc(Cl)ccc3C2)n2nc(C(C)(F)F)nc2n1	8.12494	8.42022	-0.295278	CHEMBL4706783	CHEMBL4706783	TRUE
Cn1cc(SCc2nnc(SCc3cccc(Cl)c3F)n2-c2c(Cl)cccc2Cl)c2ccccc21	Cn1cc(SCc2nnc(SCc3cccc(Cl)c3Cl)n2-c2c(Cl)cccc2Cl)c2ccccc21	5.37572	5.66959	-0.293868	CHEMBL5146928	CHEMBL5146928	TRUE
CCn1c(=O)/c(=C2\Sc3cc(Cl)ccc3N2C)s/c1=C\c1scc[n+]1Cc1cccc(F)c1	CCn1c(=O)/c(=C2\Sc3cc(Cl)ccc3N2C)s/c1=C\c1scc[n+]1Cc1cccc(Cl)c1	6	6.29243	-0.29243	CHEMBL4137415	CHEMBL4137415	TRUE
O=C(NO)c1ccc(C(=O)Nc2n[nH]c3cc(-c4ccccc4F)ccc23)cc1	O=C(NO)c1ccc(C(=O)Nc2n[nH]c3cc(-c4ccccc4Cl)ccc23)cc1	4.34679	4.63827	-0.291485	CHEMBL4187414	CHEMBL4187414	TRUE
O=S(=O)(c1ccc(F)c(F)c1)c1cnc2cc(F)ccc2c1-c1ccc(F)cc1	O=S(=O)(c1ccc(F)c(F)c1)c1cnc2cc(F)ccc2c1-c1ccc(Cl)cc1	7.36653	7.65758	-0.291046	CHEMBL4008950	CHEMBL4008950	TRUE
O=C1OCC(Cc2ccccc2)C1Cc1ccccc1F	O=C1OCC(Cc2ccccc2)C1Cc1ccccc1Cl	4.14267	4.4318	-0.289131	CHEMBL4058420	CHEMBL4058420	TRUE
O=C1NC(c2cncc(C#CC3CC(F)(F)C3)c2)C(c2ccc(F)cc2)O1	O=C1NC(c2cncc(C#CC3CC(F)(F)C3)c2)C(c2ccc(Cl)cc2)O1	7.45593	7.74473	-0.288796	CHEMBL3869979	CHEMBL3869979	TRUE
Nc1ccccc1NC(=O)c1ccc(NC(=S)NCc2ccc(F)nc2)cc1	Nc1ccccc1NC(=O)c1ccc(NC(=S)NCc2ccc(Cl)nc2)cc1	4.09151	4.37675	-0.285236	CHEMBL4019745	CHEMBL4019745	TRUE
O=C(N1CCN(c2ncnc3[nH]nc(Cl)c23)CC1)C1(c2ccc(F)cc2)CCNCC1	O=C(N1CCN(c2ncnc3[nH]nc(Cl)c23)CC1)C1(c2ccc(Cl)cc2)CCNCC1	4.42713	4.7122	-0.28507	CHEMBL4259696	CHEMBL4259696	TRUE
Cc1cnc(C(=O)Nc2cc(F)cc3cccnc23)cn1	Cc1cnc(C(=O)Nc2cc(Cl)cc3cccnc23)cn1	5	5.284	-0.283997	CHEMBL5165389	CHEMBL5165389	TRUE
O=C(Nc1ccccc1F)N[CH]1CC[CH](Oc2ccc(F)cc2)CC1	O=C(Nc1ccccc1Cl)N[CH]1CC[CH](Oc2ccc(F)cc2)CC1	4.75696	5.04096	-0.283997	CHEMBL3101113	CHEMBL3101113	TRUE
O=C(NC(NC(=S)Nc1ccc(F)cc1)C(Cl)(Cl)Cl)OCc1ccccc1	O=C(NC(NC(=S)Nc1ccc(Cl)cc1)C(Cl)(Cl)Cl)OCc1ccccc1	4.93181	5.21467	-0.282856	CHEMBL4678161	CHEMBL4678161	TRUE
COc1ccc2c(c1)CCC1=C2N=c2sc(=Cc3c[nH]c4ccc(Br)cc34)c(=O)n2C1c1ccc(F)cc1	COc1ccc2c(c1)CCC1=C2N=c2sc(=Cc3c[nH]c4ccc(Br)cc34)c(=O)n2C1c1ccc(Cl)cc1	4.65561	4.93742	-0.28181	CHEMBL3371517	CHEMBL3371517	TRUE
COc1ccc2c(c1)CCC1=C2N=c2sc(=Cc3c(C)[nH]c4ccccc34)c(=O)n2C1c1ccc(F)cc1	COc1ccc2c(c1)CCC1=C2N=c2sc(=Cc3c(C)[nH]c4ccccc34)c(=O)n2C1c1ccc(Cl)cc1	4.13212	4.41162	-0.279496	CHEMBL3371517	CHEMBL3371517	TRUE
O=C(C=Cc1ccccc1F)NCC12CC(CN1Cc1ccccc1)C2	O=C(C=Cc1ccccc1Cl)NCC12CC(CN1Cc1ccccc1)C2	4.95861	5.23657	-0.277965	CHEMBL4731972	CHEMBL4731972	TRUE
CC(Cc1cc(F)c(OCc2c(C(F)(F)F)ccn2-c2ccc(F)cc2)c(F)c1)C(=O)O	CC(Cc1cc(F)c(OCc2c(C(F)(F)F)ccn2-c2ccc(Cl)cc2)c(F)c1)C(=O)O	6.26201	6.5376	-0.275589	CHEMBL4188758	CHEMBL4188758	TRUE
Cc1[nH]c(C)c(-c2ccc(-c3ccccc3F)nc2)c(=O)c1Cl	Cc1[nH]c(C)c(-c2ccc(-c3ccccc3Cl)nc2)c(=O)c1Cl	7.3098	7.58503	-0.275223	CHEMBL4048940	CHEMBL4048940	TRUE
O=C(Nc1sc2c(c1C(=O)O)CCCCC2)c1ccc(F)cc1	O=C(Nc1sc2c(c1C(=O)O)CCCCC2)c1ccc(Cl)cc1	4.09151	4.36653	-0.275017	CHEMBL3110995	CHEMBL3110995	TRUE
CCC(=C(c1ccc(C=CC(=O)O)cc1)c1ccc2[nH]ncc2c1F)c1ccccc1	CCC(=C(c1ccc(C=CC(=O)O)cc1)c1ccc2[nH]ncc2c1Cl)c1ccccc1	8.52288	8.79588	-0.273001	CHEMBL3637453	CHEMBL3637453	TRUE
O=S(=O)(Cc1nc(-c2ccc(F)nc2)c2sccc2n1)c1cccc(Cl)c1	O=S(=O)(Cc1nc(-c2ccc(Cl)nc2)c2sccc2n1)c1cccc(Cl)c1	5.22185	5.49485	-0.273001	CHEMBL3387003	CHEMBL3387003	TRUE
CN(C)c1ccc(N2C(=O)CN(Cc3ccc(F)cc3F)C2=S)cc1F	CN(C)c1ccc(N2C(=O)CN(Cc3ccc(F)cc3Cl)C2=S)cc1F	7.55284	7.82391	-0.271067	CHEMBL4193895	CHEMBL4193895	TRUE
Cc1noc(C)c1-c1ccc2nc(N3CCN(CCN(C)C)CC3)nc(NCc3cccc(F)c3)c2c1	Cc1noc(C)c1-c1ccc2nc(N3CCN(CCN(C)C)CC3)nc(NCc3cccc(Cl)c3)c2c1	5.91009	6.18046	-0.270361	CHEMBL4264628	CHEMBL4264628	TRUE
O=c1[nH]c(=NOCc2cccc(F)c2)ccn1C1OC(COP(=O)(O)CP(=O)(O)O)C(O)C1O	O=c1[nH]c(=NOCc2cccc(Cl)c2)ccn1C1OC(COP(=O)(O)CP(=O)(O)O)C(O)C1O	5.56864	5.83863	-0.269996	CHEMBL4823003	CHEMBL4823003	TRUE
CCn1c2c(c(=O)n(Cc3ccc(Br)cc3)c1=O)CN(Cc1cccc(F)c1)CC2	CCn1c2c(c(=O)n(Cc3ccc(Br)cc3)c1=O)CN(Cc1cccc(Cl)c1)CC2	4.40894	4.67778	-0.268845	CHEMBL4334343	CHEMBL4334343	TRUE
Cc1cc(/C=C/C#N)cc(C)c1Oc1nc(NC2CCN(Cc3ccc(S(N)(=O)=O)cc3)CC2)ncc1-c1ccnc(F)c1	Cc1cc(/C=C/C#N)cc(C)c1Oc1nc(NC2CCN(Cc3ccc(S(N)(=O)=O)cc3)CC2)ncc1-c1ccnc(Cl)c1	7.41117	7.67985	-0.268685	CHEMBL4835285	CHEMBL4835285	TRUE
N#Cc1c(N2CCC(c3ccc(F)cc3)CC2)ccn(CC2CC2)c1=O	N#Cc1c(N2CCC(c3ccc(Cl)cc3)CC2)ccn(CC2CC2)c1=O	7.05061	7.31876	-0.268149	CHEMBL3378785	CHEMBL3378785	TRUE
C=CCOc1ccc(F)cc1C(=O)c1cccnc1	C=CCOc1ccc(Cl)cc1C(=O)c1cccnc1	4	4.26761	-0.267606	CHEMBL3390685	CHEMBL3390685	TRUE
Cn1cc(SCc2nnc(SCc3ccc(Cl)cc3F)n2-c2c(Cl)cccc2Cl)c2ccccc21	Cn1cc(SCc2nnc(SCc3ccc(Cl)cc3Cl)n2-c2c(Cl)cccc2Cl)c2ccccc21	4.94119	5.20831	-0.267115	CHEMBL5146928	CHEMBL5146928	TRUE
COc1cc2ncnc(Nc3cccc(F)c3)c2cc1OCCCN1CCNCCNCCNCC1	COc1cc2ncnc(Nc3cccc(Cl)c3)c2cc1OCCCN1CCNCCNCCNCC1	4.30103	4.56703	-0.266001	CHEMBL4329615	CHEMBL4329615	TRUE
CCCN(C)c1nc(C(OC)c2c(F)cccc2F)c(C)c(=O)[nH]1	CCCN(C)c1nc(C(OC)c2c(F)cccc2Cl)c(C)c(=O)[nH]1	6.74473	7.00877	-0.264046	CHEMBL4372505	CHEMBL4372505	TRUE
Fc1cc(-c2cc3c(N4CC5CCC(C4)N5)ncnc3s2)ccc1Cl	Clc1ccc(-c2cc3c(N4CC5CCC(C4)N5)ncnc3s2)cc1Cl	4.88606	5.14874	-0.262685	CHEMBL5161421	CHEMBL5161421	TRUE
Cc1nn(-c2ccccc2)c2nc(-c3ccc(F)cc3)c(C#N)c(-c3ccccc3O)c12	Cc1nn(-c2ccccc2)c2nc(-c3ccc(Cl)cc3)c(C#N)c(-c3ccccc3O)c12	6.34486	6.6073	-0.262441	CHEMBL4671169	CHEMBL4671169	TRUE
OCC1CCCCN1c1nc(NCCc2ccc(F)cc2)c2ccccc2n1	OCC1CCCCN1c1nc(NCCc2ccc(Cl)cc2)c2ccccc2n1	6.50864	6.76955	-0.260913	CHEMBL4429041	CHEMBL4429041	TRUE
Cc1ncc([N+](=O)[O-])n1CCOC(=O)NC(Nc1nc2ccc(F)cc2s1)C(F)(F)Cl	Cc1ncc([N+](=O)[O-])n1CCOC(=O)NC(Nc1nc2ccc(Cl)cc2s1)C(F)(F)Cl	4.09323	4.35203	-0.258796	CHEMBL5042297	CHEMBL5042297	TRUE
Cc1cc(O)cc(C)c1CC(N)C(=O)NC(CCCNC(=N)N)C(=O)NC(Cc1ccc(F)cc1)C(=O)NCC(N)=O	Cc1cc(O)cc(C)c1CC(N)C(=O)NC(CCCNC(=N)N)C(=O)NC(Cc1ccc(Cl)cc1)C(=O)NCC(N)=O	8.53018	8.78781	-0.257634	CHEMBL4124268	CHEMBL4124268	TRUE
O=C1Nc2ccc(F)cc2C12c1c(c3ccccc3oc1=O)Oc1c2c(=O)oc2ccccc12	O=C1Nc2ccc(Cl)cc2C12c1c(c3ccccc3oc1=O)Oc1c2c(=O)oc2ccccc12	4	4.25571	-0.255707	CHEMBL4427839	CHEMBL4427839	TRUE
O=S(=O)(c1ccc(F)cc1)N1CCCc2ccc(Oc3cc(-c4nc(C5CC5)no4)cc(Cl)n3)cc21	O=S(=O)(c1ccc(Cl)cc1)N1CCCc2ccc(Oc3cc(-c4nc(C5CC5)no4)cc(Cl)n3)cc21	7.04576	7.30103	-0.255273	CHEMBL3118588	CHEMBL3118588	TRUE
O=C(Nc1ccc(Oc2ccnc3[nH]ccc23)cc1)c1cn(-c2ccc(F)cc2)c2ccccc2c1=O	O=C(Nc1ccc(Oc2ccnc3[nH]ccc23)cc1)c1cn(-c2ccc(Cl)cc2)c2ccccc2c1=O	6.34679	6.60206	-0.255273	CHEMBL4604020	CHEMBL4604020	TRUE
O=C(O)CCc1ccc(OCc2nnc(C(=O)Nc3ccc(F)cc3)s2)cc1	O=C(O)CCc1ccc(OCc2nnc(C(=O)Nc3ccc(Cl)cc3)s2)cc1	5.17783	5.43297	-0.255142	CHEMBL3807104	CHEMBL3807104	TRUE
O=C(O)c1csc(C2CCC3C(CC(O)C3COc3ccc(F)cc3)O2)n1	O=C(O)c1csc(C2CCC3C(CC(O)C3COc3ccc(Cl)cc3)O2)n1	8.1549	8.40894	-0.254033	CHEMBL3808242	CHEMBL3808242	TRUE
CCOc1nc(-c2cc3ccccc3o2)cc(-c2ccc(F)cc2)c1C#N	CCOc1nc(-c2cc3ccccc3o2)cc(-c2ccc(Cl)cc2)c1C#N	3.4023	3.65561	-0.253303	CHEMBL3794879	CHEMBL3794879	TRUE
COc1ccc(C(C)(O)c2ncnc3c(F)cccc23)cc1	COc1ccc(C(C)(O)c2ncnc3c(Cl)cccc23)cc1	6.36653	6.61979	-0.253257	CHEMBL4619194	CHEMBL4619194	TRUE
O=C1C=CCCN1C(=O)C=Cc1ccc(F)cc1	O=C1C=CCCN1C(=O)C=Cc1ccc(Cl)cc1	5.16749	5.42022	-0.252725	CHEMBL4233055	CHEMBL4233055	TRUE
O=C(NNC(=O)c1cc(I)cc(I)c1O)c1ccc(F)cc1	O=C(NNC(=O)c1cc(I)cc(I)c1O)c1ccc(Cl)cc1	4.06053	4.31292	-0.252386	CHEMBL4813023	CHEMBL4813023	TRUE
CC(=O)Nc1ccc(S(=O)(=O)NC(Cc2ccccc2)c2nc3ccccc3c(=O)n2N=Cc2ccccc2F)cc1	CC(=O)Nc1ccc(S(=O)(=O)NC(Cc2ccccc2)c2nc3ccccc3c(=O)n2N=Cc2ccccc2Cl)cc1	8.89279	9.14267	-0.249877	CHEMBL4335874	CHEMBL4335874	TRUE
CC(c1ccc(-c2cc(F)ccc2-c2nc(=O)o[nH]2)cc1)N(CC1CC1)c1nc2c(C(=O)O)cccc2o1	CC(c1ccc(-c2cc(Cl)ccc2-c2nc(=O)o[nH]2)cc1)N(CC1CC1)c1nc2c(C(=O)O)cccc2o1	8.63827	8.88606	-0.247784	CHEMBL4727805	CHEMBL4727805	TRUE
O=C(CCCCCCn1cc(Nc2ncc(Cl)c(Nc3ccc(F)cc3)n2)cn1)NO	O=C(CCCCCCn1cc(Nc2ncc(Cl)c(Nc3ccc(Cl)cc3)n2)cn1)NO	6.67778	6.92082	-0.243038	CHEMBL4347589	CHEMBL4347589	TRUE
O=C(Nc1ccc2oc(-c3ccccc3F)nc2c1)c1cc([N+](=O)[O-])ccc1Cl	O=C(Nc1ccc2oc(-c3ccccc3Cl)nc2c1)c1cc([N+](=O)[O-])ccc1Cl	5.3098	5.55284	-0.243038	CHEMBL2329694	CHEMBL2329694	TRUE
Nc1nccc(Oc2ccc(NC(=O)c3cc4ccccc4n(-c4ccc(F)c(F)c4)c3=O)cc2F)c1Cl	Nc1nccc(Oc2ccc(NC(=O)c3cc4ccccc4n(-c4ccc(F)c(Cl)c4)c3=O)cc2F)c1Cl	6.1796	6.42136	-0.241759	CHEMBL4432474	CHEMBL4432474	TRUE
COc1cc(OCc2cccc(-c3ccc(F)nc3)c2)c2cc(-c3cn4nc(OC)sc4n3)oc2c1	COc1cc(OCc2cccc(-c3ccc(Cl)nc3)c2)c2cc(-c3cn4nc(OC)sc4n3)oc2c1	8.88941	9.13077	-0.241358	CHEMBL3721050	CHEMBL3721050	TRUE
[truncated: 1,267 more rows]

## Sheet: Solubility
Structure F	Structure Cl	Solubility F	Solubility Cl	Diff Solubility	Assay F	Assay Cl	true/false			F	Cl	Difference
[truncated: 247 more rows]

## Sheet: CC50
Cc1cc(OCC(=O)Nc2ccc(F)cc2)nc(Nc2ccc(C#N)cc2)n1	Cc1cc(OCC(=O)Nc2ccc(Cl)cc2)nc(Nc2ccc(C#N)cc2)n1	3.47986	5.58004	-2.10019	CHEMBL3399854	CHEMBL3399854	TRUE			F	Cl	Difference
[truncated: 585 more rows]

[truncated: 10 more sheets: log D, AUC, cmax, Plasma clearance rate, vdss, Plasma t12, Permeability, Metabolic % stability, Metabolic cl, Metabolic t12]
